# Supplementary material for: Asymmetric addition of hydrazones as alkyl carbanion equivalents with aryl imines in water
Source: Royal Society of Chemistry journal article supplement (doi:10.1039/d3qo00475a), 2023-01-01
Supplement: d3qo00475a1.pdf [file d3qo00475a1.pdf]

## Supporting Information

# Asymmetric addition of hydrazones as alkyl carbanion equivalents with aryl imines in water

Yi-Zhan Wang,<sup>a,b</sup> Shao-Dong Liu,<sup>a,b</sup> Liang Cheng,<sup>a,b</sup> Li Liu,<sup>a,b,\*</sup> and Chao-Jun Li<sup>c,\*</sup>

<sup>a</sup> Beijing National Laboratory for Molecular Sciences (BNLMS), CAS Key Laboratory of Molecular Recognition and Function, CAS Research/Education Center for Excellence in Molecular Sciences, Institute of Chemistry, Chinese Academy of Sciences, Beijing 100190, China.

<sup>b</sup> University of Chinese Academy of Sciences, Beijing 100049, China

<sup>c</sup> Department of Chemistry, and FQRNT Centre for Green Chemistry and Catalysis, McGill University, 801 Sherbrooke Street West, Montreal, Quebec H3A 0B8, Canada.

E-mail: lliu@iccas.ac.cn; cj.li@mcgill.ca

| Table of Contents |                                                                               |        |
|-------------------|-------------------------------------------------------------------------------|--------|
| I.                | General information                                                           | 2      |
| II                | Optimization of conditions for the model reaction of <b>1a</b> with <b>2a</b> | 2      |
| III.              | Experimental Procedures                                                       | 3-4    |
| IV.               | Characterization Data                                                         | 5-22   |
| V.                | Assignment of the Absolute Configuration                                      | 23-24  |
| VI.               | NMR Spectra                                                                   | 25-62  |
| VII.              | HPLC Spectra                                                                  | 63-101 |
| VIII.             | References                                                                    | 102    |

## I. General information

All reagents and solvents were purchased from commercial sources (Energy Chemical, TCI, Acros, Alfa and J&K) and used without further purification unless otherwise stated. The  $^1\text{H}$  and  $^{13}\text{C}$  NMR spectra were recorded on Bruker Avance 300 ( $^1\text{H}$ , 300 MHz), Bruker Avance 400 ( $^1\text{H}$ , 400 MHz;  $^{13}\text{C}$ , 101 MHz) and Bruker Avance III HD 500MHz ( $^1\text{H}$ , 500 MHz;  $^{13}\text{C}$ , 126 MHz) spectrometers. All chemical shifts ( $\delta$ ) were given in ppm. Data were reported as follows: chemical shift, integration, multiplicity (s = single, d = doublet, t = triplet, q = quartet, m = multiplet) and coupling constants (Hz). Flash column chromatography was performed using H silica gel. For thin-layer chromatography (TLC), silica gel plates (HSGF 254) were used and compounds were visualized by irradiation with UV light. Infrared (IR) spectra were recorded on Nicolet 6700 instrument. High-resolution mass spectra (HRMS) were recorded by a Thermo Fisher Scientific Exactive Orbitrap mass spectrometer. HPLC analysis was carried out on an Agilent 1260 Infinity system with Daicel CHIRALPAK® or Daicel CHIRALCEL® columns. Organic solutions were concentrated under reduced pressure on the Heidolph rotary evaporator. Optical rotations were measured on a Rudolph Autopol VI polarimeter.

## II. Table S1. Optimization of conditions for the model reaction of 1a with 2a

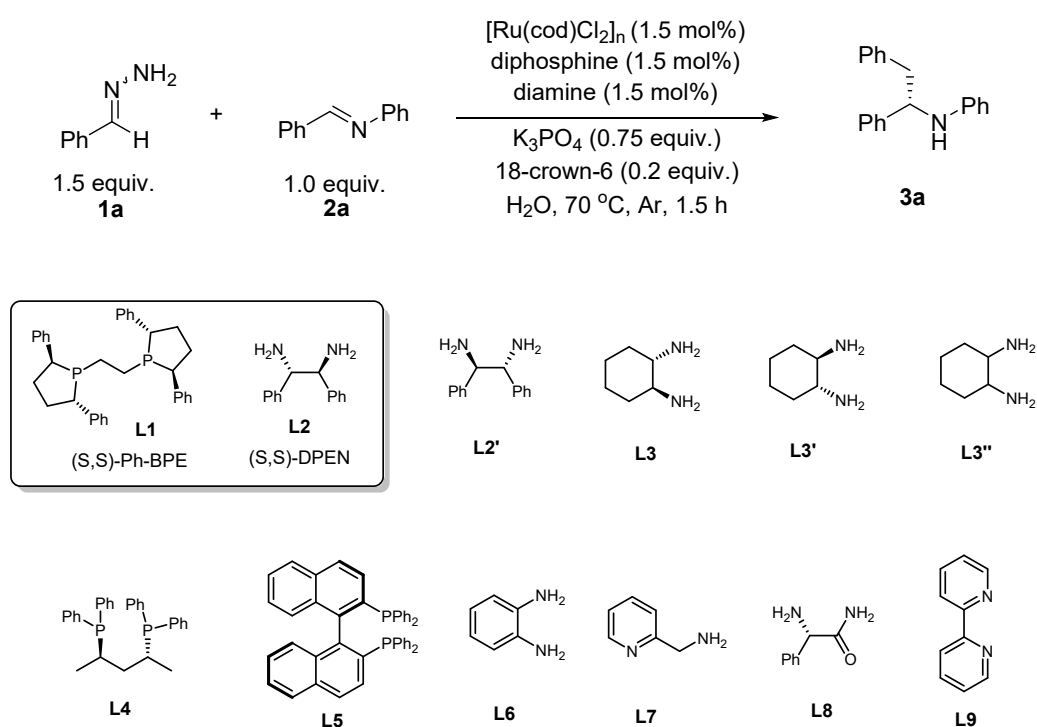

| Entry | Diphosphine | Diamine | Yield | e.e. |
|-------|-------------|---------|-------|------|
| 1     | L1          | L2      | 54%   | 78%  |
| 2     | L1          | -       | 14%   | 8%   |
| 3     | -           | L2      | 17%   | 10%  |
| 4     | L1          | L2'     | 33%   | 50%  |
| 5     | L1          | L3      | 56%   | 72%  |
| 6     | L1          | L3'     | 34%   | 26%  |
| 7     | L1          | L3''    | 33%   | 46%  |
| 8     | L1          | L6      | 45%   | 15%  |
| 9     | L1          | L7      | 26%   | 66%  |
| 10    | L1          | L8      | 24%   | 11%  |
| 11    | L1          | L9      | 35%   | 20%  |
| 12    | L4          | L2      | 29%   | 17%  |
| 13    | L5          | L2      | 17%   | 14%  |

### III. Experimental Procedure

#### i. General procedure A (asymmetric addition reaction)

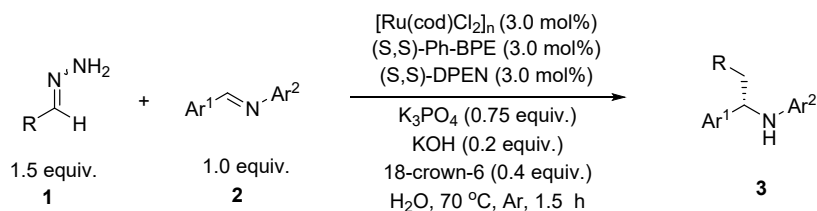

A Schlenk tube (10 mL) equipped with a magnetic stir bar was charged with  $[\text{Ru}(\text{cod})\text{Cl}_2]_n$  (1.7 mg, 0.006 mmol, 3.0 mol%), (S,S)-Ph-BPE (3.1 mg, 0.006 mmol, 3.0 mol%), (S,S)-DPEN (1.3 mg, 0.006 mmol, 3.0 mol%),  $\text{K}_3\text{PO}_4$  (31.8 mg, 0.15 mmol, 0.75 equiv.), 18-crown-6 (21.1 mg, 0.08 mmol, 0.4 equiv.), KOH (2.24 mg, 0.04 mmol, 0.2 equiv.), imine (0.2 mmol, 1.0 equiv.) and hydrazone (0.3 mmol, 1.5 equiv.). The reaction system was then protected with argon atmosphere. Then, distilled water (0.2 mL) was added to the reaction system and heated to 70 °C. The reaction mixture was stirred at 70 °C for 1.5 hours. After cooling to room temperature, 3 mL water was added. The reaction mixture was extracted with ethyl acetate (3x5 mL). The combined organic layers were washed with water (5 mL) and then dried over  $\text{Na}_2\text{SO}_4$ . The organic layers were concentrated and the resulting residue was purified by preparative TLC on silica gel to afford the product.

#### ii. General procedure B (Racemic addition reaction) <sup>1</sup>

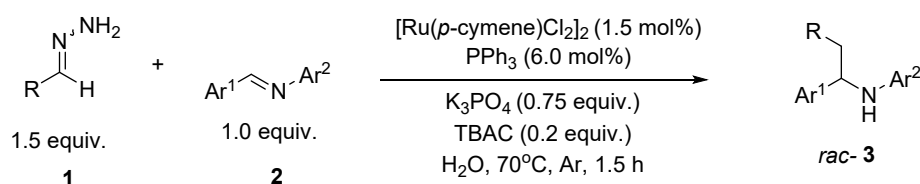

A Schlenk tube (10 mL) equipped with a magnetic stir bar was charged with  $[\text{Ru}(p\text{-cymene})\text{Cl}_2]_2$  (1.8 mg, 0.003 mmol, 1.5 mol%),  $\text{PPh}_3$  (3.1 mg, 0.012 mmol, 6.0 mol%),  $\text{K}_3\text{PO}_4$  (31.8 mg, 0.15 mmol, 0.75 equiv.), TBAC (11.1 mg, 0.04 mmol, 0.2 equiv.), imine (0.2 mmol, 1.0 equiv.) and hydrazone (0.3 mmol, 1.5 equiv.). The reaction system was then protected with argon atmosphere. Then, distilled water (0.2 mL) was added. The mixture was heated to 70 °C, and stirred for 1.5 hours. After cooling to room temperature, 3 mL water was added. The reaction mixture was extracted with ethyl acetate (3x5 mL). The combined organic layers were washed with water (5 mL) and then dried over  $\text{Na}_2\text{SO}_4$ . The organic layers were concentrated and the resulting residue was purified by preparative TLC on silica gel to afford the racemic product.

#### iii. Derivatization reaction: Removal of protective groups in **3au** <sup>2</sup>

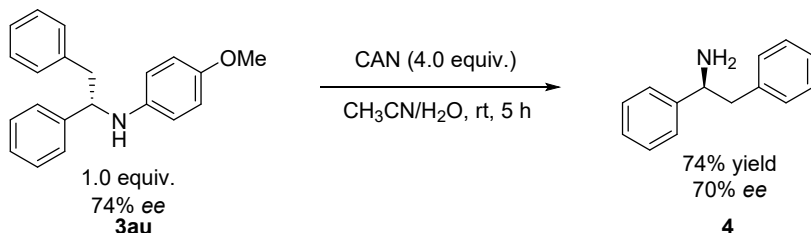

A solution of CAN (0.4 mmol) in  $\text{H}_2\text{O}$  (0.125 mL) was added to a stirred solution of the corresponding protected amine **3au** or *rac*-**3au** (0.1 mmol) in  $\text{CH}_3\text{CN}/\text{H}_2\text{O}$  (0.5 mL). The reaction mixture was stirred for 2 h. Afterwards  $\text{CH}_2\text{Cl}_2$  (1 mL) was added and the organic phase separated. A 10% solution of NaOH (2 mL) was added to the aqueous phase which was then extracted with EtOAc (2 x 25 mL). The combined organic phases were dried ( $\text{MgSO}_4$ ) and the solvent removed under reduced pressure. The residue was purified by preparative TLC on silica gel to afford the corresponding pure amine.<sup>3</sup>

#### iv. Procedure of deuterium labelling study

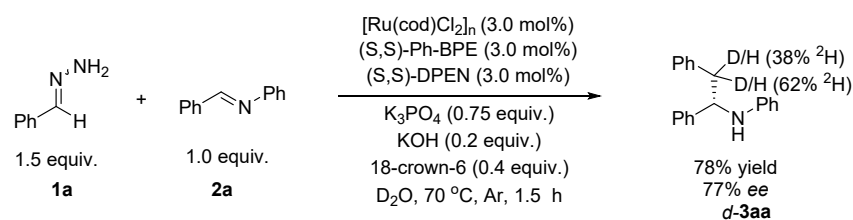

A Schlenk tube (10 mL) equipped with a magnetic stir bar was charged with  $[\text{Ru}(\text{cod})\text{Cl}_2]_n$  (1.7 mg, 0.006 mmol, 3.0 mol%), (S,S)-Ph-BPE (3.1 mg, 0.006 mmol, 3.0 mol%), (S,S)-DPEN (1.3 mg, 0.006 mmol, 3.0 mol%),  $\text{K}_3\text{PO}_4$  (31.8 mg, 0.15 mmol, 0.75 equiv.), 18-crown-6 (21.1 mg, 0.08 mmol, 0.4 equiv.), KOH (2.24 mg, 0.04 mmol, 0.2 equiv.), N-benzylideneaniline (36.2 mg, 0.2 mmol, 1.0 equiv.) and benzylidenehydrazine (34  $\mu\text{L}$ , 0.3 mmol, 1.5 equiv.). The reaction system was then protected with argon atmosphere. Then, deuterium oxide (0.2 mL) was added and heated to 70  $^\circ\text{C}$ . The reaction mixture was stirred at 70  $^\circ\text{C}$  for 1.5 hours. After cooling to room temperature, 3 mL water was added. The reaction mixture was extracted with ethyl acetate (3x5 mL). The combined organic layers were washed with water (5 mL) and then dried over  $\text{Na}_2\text{SO}_4$ . The organic layers were concentrated and the resulting residue was purified by preparative TLC on silica gel to afford the product.

#### v. Preparation of Hydrazones

A mixture of carbonyl compounds (5.0 mmol, 1 equiv) and hydrazine monohydrate (0.34 mL, 6.0 mmol, 85 wt. %, 1.2 equiv) in THF (11 mL) solution was stirred at room temperature for 30 min. The solvent was removed *in vacuo* to provide the desired hydrazone. The crude hydrazone was used directly without further purification.<sup>4</sup>

#### vi. Preparation of imines

A mixture of the aromatic aldehyde (3.0 mmol, 1.0 equiv), aniline (3.0 mmol, 1.0 equiv) and  $\text{MgSO}_4$  (0.84 mmol, 0.28 equiv) in THF (1 mL) solution was stirred at room temperature for 5 h. The mixture was dissolved in dichloromethane, then filtered through a pad of celite and rinsed with dichloromethane. The solid hydrated  $\text{MgSO}_4$  was filtered off and the filtrate was concentrated under reduce pressure. The crude imine was used directly without further purification.<sup>5</sup>

#### vii. Preparation of cyclic imine

To the argon purged glass vial containing 2-amino phenol (119.9 mg, 1.1 mmol) in polyethylene glycol (400 MW, 2.0 mL) were added potassium carbonate (138.2 mg, 1.0 mmol) and 2- fluorobenzaldehyde (124.1 mg, 1.0 mmol), and stirred at 100  $^\circ\text{C}$  for 13 h during which the reaction was monitored by means of Thin Layer Chromatography. The reaction mixture was extracted with ether (3x6 mL). The combined ether layers were washed with water and brine, dried over anhydrous sodium sulfate, and concentrated under reduced pressure. The crude cyclic imine was used directly without further purification.<sup>6</sup>

#### IV. Characterization Data

##### (S)-N-(1,2-diphenylethyl)aniline (**3aa**)

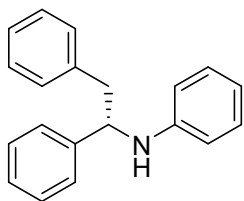

Following the general reaction procedure A, **3aa** was obtained from the benzaldehyde hydrazone (**1a**, 34  $\mu$ L, 0.3 mmol, 1.5 equiv.) and *N*-benzylideneaniline (**2a**, 36.2 mg, 0.2 mmol, 1.0 equiv.), as a colorless solid (44.7 mg, 82%, 91:9 er), mp. 58-60 °C.

$R_f$  = 0.71 (Petroleum ether/Dichloromethane = 1:1).

**FT-IR** (neat,  $\text{cm}^{-1}$ ) 3026, 1601, 1508, 1317, 1275, 750, 699.

**$^1\text{H}$  NMR** (300 MHz,  $\text{CDCl}_3$ )  $\delta$  7.37-7.16 (m, 8H), 7.16-7.08 (m, 2H), 7.04 (dd,  $J$  = 8.4, 7.4 Hz, 2H), 6.62 (t,  $J$  = 7.3 Hz, 1H), 6.51-6.38 (m, 2H), 4.58 (t,  $J$  = 8.5 Hz, 1H), 4.11 (s, 1H), 3.13 (dd,  $J$  = 13.9, 5.7 Hz, 1H), 3.01 (dd,  $J$  = 14.0, 8.2 Hz, 1H).

**$^{13}\text{C}$  NMR** (101 MHz,  $\text{CDCl}_3$ )  $\delta$  147.4, 143.6, 137.8, 129.4, 129.2, 128.71, 128.67, 127.2, 126.9, 126.6, 117.6, 113.8, 59.4, 45.3.

**HRMS**(ESI,  $m/z$ ), calcd for  $\text{C}_{20}\text{H}_{20}\text{N}^+$  [ $\text{M}+\text{H}$ ] $^+$ , 274.1590; found, 274.1586.

**HPLC analysis:** Chiracel OD-H, *n*-Hexane:*i*-PrOH = 98:2, 1.0 mL/min, UV = 254 nm. Retention time (min): 8.8 (minor) and 11.2 (major).

$[\alpha]_D^{20}$  = -35.33 ( $c$  = 1.0,  $\text{CHCl}_3$ , 91:9 er).

##### (S)-N-(2-(3-methoxyphenyl)-1-phenylethyl)aniline (**3ba**)

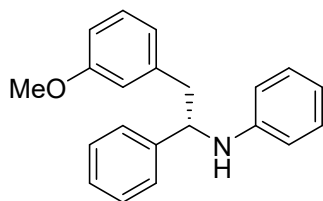

Following the general reaction procedure A, **3ba** was obtained from the (3-methoxybenzylidene)hydrazine (**1e**, 45.0 mg, 0.3 mmol, 1.5 equiv.) and *N*-benzylideneaniline (**2a**, 36.2 mg, 0.2 mmol, 1.0 equiv.), as a yellow oil (39.8 mg, 66%, 87:13 er).

$R_f$  = 0.61 (Petroleum ether/Dichloromethane = 1:1).

**FT-IR** (neat,  $\text{cm}^{-1}$ ) 3406, 3053, 3027, 2919, 1600, 1506, 1262, 1153, 1052, 750, 692.

**$^1\text{H}$  NMR** (300 MHz,  $\text{CDCl}_3$ )  $\delta$  7.37-7.25 (m, 4H), 7.25-7.13 (m, 2H), 7.04 (t,  $J$  = 7.9 Hz, 2H), 6.75 (dd,  $J$  = 12.4, 4.5 Hz, 2H), 6.66-6.57 (m, 2H), 6.45 (d,  $J$  = 7.7 Hz, 2H), 4.57 (dd,  $J$  = 7.7, 6.0 Hz, 1H), 4.12 (s, 1H), 3.71 (s, 3H), 3.11 (dd,  $J$  = 13.9, 5.7 Hz, 1H), 2.98 (dd,  $J$  = 13.9, 8.1 Hz, 1H).

**$^{13}\text{C}$  NMR** (101 MHz,  $\text{CDCl}_3$ )  $\delta$  159.8, 147.4, 143.6, 139.3, 129.6, 129.1, 128.7, 127.2, 126.6, 121.7, 117.6, 115.0, 113.8, 112.4, 59.3, 55.3, 45.3.

**HRMS**(ESI,  $m/z$ ), calcd for  $\text{C}_{21}\text{H}_{22}\text{ON}^+$  [ $\text{M}+\text{H}$ ] $^+$ , 304.1696; found, 304.1693.

**HPLC analysis:** Chiracel OD-H, *n*-Hexane:*i*-PrOH = 98:2, 1.0 mL/min, UV = 254 nm. Retention time (min): 11.1 (minor) and 24.9 (major).

$[\alpha]_D^{20}$  = -47.75 ( $c$  = 1.0,  $\text{CHCl}_3$ , 87:13 er).

##### (S)-N-(2-(4-methoxyphenyl)-1-phenylethyl)aniline (**3ca**)

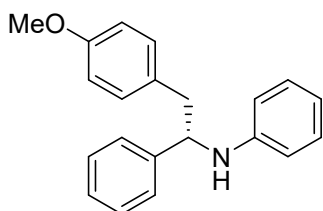

Following the general reaction procedure A, **3ca** was obtained from the (4-methoxybenzylidene)hydrazine (**1d**, 45.0 mg, 0.3 mmol, 1.5 equiv.) and *N*-benzylideneaniline (**2a**, 36.2 mg, 0.2 mmol, 1.0 equiv.), as a white solid (28.5 mg, 47%, 86:14 er), mp. 125-127 °C.

$R_f$  = 0.54 (Petroleum ether/Dichloromethane = 1:1).

**FT-IR** (neat,  $\text{cm}^{-1}$ ) 3042, 2919, 1603, 1507, 1248, 1178, 1301, 750, 700.

**$^1\text{H}$  NMR** (400 MHz,  $\text{CDCl}_3$ )  $\delta$  7.35-7.16 (m, 5H), 7.03 (dd,  $J$  = 14.6, 8.0 Hz, 4H), 6.80 (d,  $J$  = 8.5 Hz, 2H), 6.62 (t,  $J$  = 7.3 Hz, 1H), 6.45 (d,  $J$  = 7.9 Hz, 2H), 4.53 (dd,  $J$  = 7.8, 6.0 Hz, 1H), 4.13 (s, 1H), 3.78 (s, 3H), 3.07 (dd,  $J$  = 14.0, 5.8 Hz, 1H), 2.95 (dd,  $J$  = 14.0, 8.0 Hz, 1H).

**$^{13}\text{C}$  NMR** (101 MHz,  $\text{CDCl}_3$ )  $\delta$  158.6, 147.4, 143.6, 130.3, 129.8, 129.1, 128.7, 127.2, 126.6, 117.6, 114.1, 113.9, 59.5, 55.4, 44.4.

**HRMS**(ESI,  $m/z$ ), calcd for  $\text{C}_{21}\text{H}_{22}\text{ON}^+$  [ $\text{M}+\text{H}$ ] $^+$ , 304.1696; found, 304.1692.

**HPLC analysis:** Chiracel OD-H, *n*-Hexane:*i*-PrOH = 98:2, 1.0 mL/min, UV = 254 nm. Retention time (min): 11.5 (minor) and 14.6 (major).

$[\alpha]_D^{20}$  = -45.99 ( $c$  = 1.0,  $\text{CHCl}_3$ , 86:14 er).

#### (*S*)-*N*-(2-(2,3-dimethoxyphenyl)-1-phenylethyl)aniline (**3da**)

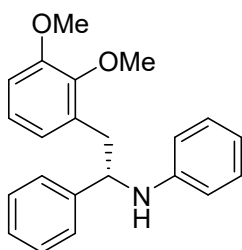

Following the general reaction procedure A, **3da** was obtained from the (2,3-dimethoxybenzylidene)hydrazine (**1i**, 54.0 mg, 0.3 mmol, 1.5 equiv.) and *N*-benzylideneaniline (**2a**, 36.2 mg, 0.2 mmol, 1.0 equiv.), as a yellow oil (54.6 mg, 82%, 91:9 er).

$R_f$  = 0.58 (Petroleum ether/Dichloromethane = 1:1).

**FT-IR** (neat,  $\text{cm}^{-1}$ ) 3393, 3025, 2933, 1601, 1507, 1481, 1267, 1078, 1006, 748, 692.

**$^1\text{H}$  NMR** (400 MHz,  $\text{CDCl}_3$ )  $\delta$  7.40 (d,  $J$  = 7.4 Hz, 2H), 7.31 (t,  $J$  = 7.5 Hz, 2H), 7.23 (dd,  $J$  = 12.2, 4.9 Hz, 1H), 7.01 (t,  $J$  = 7.9 Hz, 2H), 6.93 (t,  $J$  = 7.9 Hz, 1H), 6.84-6.75 (m, 1H), 6.67 (d,  $J$  = 7.6 Hz, 1H), 6.56 (t,  $J$  = 7.3 Hz, 1H), 6.44 (d,  $J$  = 7.8 Hz, 2H), 4.88 (s, 1H), 4.51 (dd,  $J$  = 9.1, 4.6 Hz, 1H), 3.86 (s, 6H), 3.09 (dd,  $J$  = 13.6, 9.1 Hz, 1H), 2.99 (dd,  $J$  = 13.7, 4.6 Hz, 1H).

**$^{13}\text{C}$  NMR** (101 MHz,  $\text{CDCl}_3$ )  $\delta$  152.9, 147.8, 147.5, 144.3, 132.3, 129.0, 128.7, 127.1, 126.5, 124.2, 122.9, 116.9, 113.4, 111.3, 60.8, 60.1, 55.9, 39.9.

**HRMS**(ESI,  $m/z$ ), calcd for  $\text{C}_{22}\text{H}_{24}\text{O}_2\text{N}^+$  [ $\text{M}+\text{H}$ ] $^+$ , 334.1802; found, 334.1796.

**HPLC analysis:** Chiracel OD-H, *n*-Hexane:*i*-PrOH = 99:1, 1.0 mL/min, UV = 254 nm. Retention time (min): 9.8 (minor) and 11.1 (major).

$[\alpha]_D^{20}$  = -42.16 ( $c$  = 1.0,  $\text{CHCl}_3$ , 91:9 er).

#### (*S*)-*N*-(2-(3,4-dimethoxyphenyl)-1-phenylethyl)aniline (**3ea**)

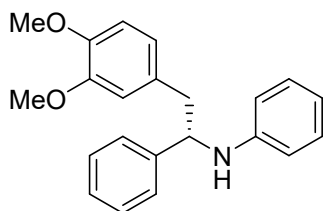

Following the general reaction procedure A, **3ea** was obtained from the (3,4-dimethoxybenzylidene)hydrazine (**1j**, 54.0 mg, 0.3 mmol, 1.5 equiv.) and *N*-benzylideneaniline (**2a**, 36.2 mg, 0.2 mmol, 1.0 equiv.), as a yellow oil (34.7 mg, 52%, 89:11 er).

$R_f$  = 0.39 (Petroleum ether/Dichloromethane = 1:1).

**FT-IR** (neat,  $\text{cm}^{-1}$ ) 3390, 2933, 1602, 1516, 1261, 1028, 750.

**$^1\text{H NMR}$**  (300 MHz,  $\text{CDCl}_3$ )  $\delta$  7.28 (t,  $J$  = 6.0 Hz, 4H), 7.26-7.20 (m, 1H), 7.05 (t,  $J$  = 7.9 Hz, 2H), 6.77 (d,  $J$  = 8.1 Hz, 1H), 6.73-6.57 (m, 2H), 6.51-6.38 (m, 3H), 4.55 (t,  $J$  = 6.7 Hz, 1H), 4.13 (s, 1H), 3.85 (s, 3H), 3.71 (s, 3H), 3.07 (dd,  $J$  = 13.9, 6.0 Hz, 1H), 2.98 (dd,  $J$  = 13.8, 7.5 Hz, 1H).

**$^{13}\text{C NMR}$**  (101 MHz,  $\text{CDCl}_3$ )  $\delta$  148.9, 148.0, 147.4, 143.5, 130.1, 129.2, 128.7, 127.1, 126.7, 121.5, 117.6, 113.8, 112.6, 111.3, 59.3, 56.0, 55.8, 44.7.

**HRMS**(ESI,  $m/z$ ), calcd for  $\text{C}_{22}\text{H}_{24}\text{O}_2\text{N}^+$  [ $\text{M}+\text{H}$ ] $^+$ , 334.1802; found, 334.1800.

**HPLC analysis:** Chiracel OD-H, *n*-Hexane:*i*-PrOH = 98:2, 1.0 mL/min, UV = 254 nm. Retention time (min): 21.8 (minor) and 36.5 (major).

$[\alpha]_D^{20}$  = -46.20 ( $c$  = 1.0,  $\text{CHCl}_3$ , 89:11 er).

#### (*S*)-*N*-(2-(3,5-dimethoxyphenyl)-1-phenylethyl)aniline (**3fa**)

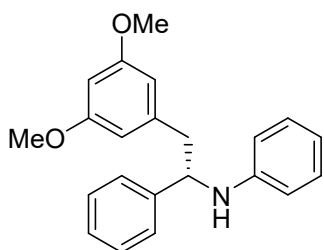

Following the general reaction procedure A, **3fa** was obtained from the (3,5-dimethoxybenzylidene)hydrazine (**1h**, 54.0 mg, 0.3 mmol, 1.5 equiv.) and *N*-benzylideneaniline (**2a**, 36.2 mg, 0.2 mmol, 1.0 equiv.), as a yellow oil (43.9 mg, 66%, 88:12 er).

$R_f$  = 0.58 (Petroleum ether/Dichloromethane = 1:1).

**FT-IR** (neat,  $\text{cm}^{-1}$ ) 3735, 2933, 1603, 1507, 1205, 1150, 1068, 832, 750, 700.

**$^1\text{H NMR}$**  (300 MHz,  $\text{CDCl}_3$ )  $\delta$  7.39-7.17 (m, 5H), 7.04 (t,  $J$  = 7.9 Hz, 2H), 6.62 (t,  $J$  = 7.3 Hz, 1H), 6.46 (d,  $J$  = 7.7 Hz, 2H), 6.32 (t,  $J$  = 2.1 Hz, 1H), 6.25 (d,  $J$  = 2.1 Hz, 2H), 4.63-4.49 (m, 1H), 4.14 (s, 1H), 3.71 (s, 6H), 3.07 (dd,  $J$  = 13.8, 5.6 Hz, 1H), 2.94 (dd,  $J$  = 13.8, 8.1 Hz, 1H).

**$^{13}\text{C NMR}$**  (126 MHz,  $\text{CDCl}_3$ )  $\delta$  161.0, 147.4, 143.5, 140.0, 129.1, 128.7, 127.2, 126.6, 117.6, 113.8, 107.4, 98.9, 59.2, 55.4, 45.6.

**HRMS**(ESI,  $m/z$ ), calcd for  $\text{C}_{22}\text{H}_{24}\text{O}_2\text{N}^+$  [ $\text{M}+\text{H}$ ] $^+$ , 334.1802; found, 334.1798.

**HPLC analysis:** Chiracel OD-H, *n*-Hexane:*i*-PrOH = 95:5, 1.0 mL/min, UV = 254 nm. Retention time (min): 8.5 (minor) and 22.3 (major).

$[\alpha]_D^{20}$  = -33.56 ( $c$  = 1.0,  $\text{CHCl}_3$ , 88:12 er).

#### (*S*)-*N*-(1-phenyl-2-(3,4,5-trimethoxyphenyl)ethyl)aniline (**3ga**)

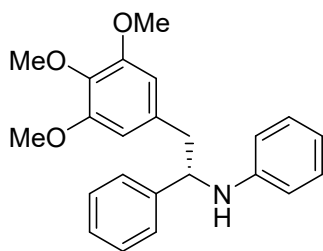

Following the general reaction procedure A, **3ga** was obtained from the (3,4,5-trimethoxybenzylidene)hydrazine (**1l**, 63.0 mg, 0.3 mmol, 1.5 equiv.) and *N*-benzylideneaniline (**2a**, 36.2 mg, 0.2 mmol, 1.0 equiv.), as a brown oil (44.4 mg, 61%, 89:11 er).

$R_f = 0.29$  (Petroleum ether/Dichloromethane = 1:1).

**FT-IR** (neat,  $\text{cm}^{-1}$ ) 3389, 3001, 2937, 2838, 1601, 1506, 1454, 1423, 1322, 1242, 1128, 1007, 750, 701.

**$^1\text{H NMR}$**  (300 MHz,  $\text{CDCl}_3$ )  $\delta$  7.30 (d,  $J = 4.3$  Hz, 4H), 7.26-7.20 (m, 1H), 7.06 (t,  $J = 7.9$  Hz, 2H), 6.64 (t,  $J = 7.3$  Hz, 1H), 6.48 (d,  $J = 7.8$  Hz, 2H), 6.24 (s, 2H), 4.57 (t,  $J = 6.6$  Hz, 1H), 4.14 (s, 1H), 3.82 (s, 3H), 3.74 (s, 6H), 3.07 (dd,  $J = 13.8, 6.0$  Hz, 1H), 2.97 (dd,  $J = 13.7, 7.4$  Hz, 1H).

**$^{13}\text{C NMR}$**  (101 MHz,  $\text{CDCl}_3$ )  $\delta$  153.2, 147.3, 143.3, 136.9, 133.2, 129.2, 128.7, 127.2, 126.7, 117.7, 113.8, 106.5, 61.0, 59.2, 56.2, 45.4.

**HRMS**(ESI,  $m/z$ ), calcd for  $\text{C}_{23}\text{H}_{26}\text{O}_3\text{N}^+ [\text{M}+\text{H}]^+$ , 364.1907; found, 364.1901.

**HPLC analysis:** Chiracel OD-H, *n*-Hexane:*i*-PrOH = 98:2, 1.0 mL/min, UV = 254 nm. Retention time (min): 23.3 (minor) and 48.9 (major).

$[\alpha]_D^{20} = -30.22$  ( $c = 1.0$ ,  $\text{CHCl}_3$ , 89:11 er).

#### (*S*)-*N*-(2-(4-methoxy-3-methylphenyl)-1-phenylethyl)aniline (**3ha**)

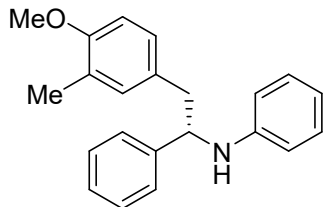

Following the general reaction procedure A, **3ha** was obtained from the (4-methoxy-3-methylbenzylidene)hydrazine (**1p**, 49.2 mg, 0.3 mmol, 1.5 equiv.) and *N*-benzylideneaniline (**2a**, 36.2 mg, 0.2 mmol, 1.0 equiv.), as a brown oil (25.3 mg, 40%, 90:10 er).

$R_f = 0.67$  (Petroleum ether/Dichloromethane = 1:1).

**FT-IR** (neat,  $\text{cm}^{-1}$ ) 3412, 2918, 2853, 2369, 1602, 1506, 1255, 1134, 1031, 749, 699.

**$^1\text{H NMR}$**  (400 MHz,  $\text{CDCl}_3$ )  $\delta$  7.37-7.26 (m, 4H), 7.22 (d,  $J = 6.6$  Hz, 1H), 7.03 (t,  $J = 7.8$  Hz, 2H), 6.90 (d,  $J = 7.4$  Hz, 2H), 6.71 (d,  $J = 8.2$  Hz, 1H), 6.61 (t,  $J = 7.3$  Hz, 1H), 6.44 (d,  $J = 8.0$  Hz, 2H), 4.51 (dd,  $J = 8.2, 5.6$  Hz, 1H), 4.06 (d,  $J = 66.8$  Hz, 1H), 3.80 (s, 3H), 3.05 (dd,  $J = 14.0, 5.4$  Hz, 1H), 2.88 (dd,  $J = 14.0, 8.5$  Hz, 1H), 2.16 (s, 3H).

**$^{13}\text{C NMR}$**  (101 MHz,  $\text{CDCl}_3$ )  $\delta$  156.8, 147.5, 143.8, 131.7, 129.3, 129.1, 128.7, 127.5, 127.1, 126.8, 126.6, 117.6, 113.9, 110.1, 59.5, 55.5, 44.6, 16.3.

**HRMS**(ESI,  $m/z$ ), calcd for  $\text{C}_{22}\text{H}_{24}\text{ON}^+ [\text{M}+\text{H}]^+$ , 318.1852; found, 318.1850.

**HPLC analysis:** Chiracel OD-H, *n*-Hexane:*i*-PrOH = 97:3, 1.0 mL/min, UV = 254 nm. Retention time (min): 7.2 (minor) and 9.4 (major).

$[\alpha]_D^{20} = -69.16$  ( $c = 1.0$ ,  $\text{CHCl}_3$ , 90:10 er).

#### (*S*)-*N*-(2-(3-ethoxy-4-methoxyphenyl)-1-phenylethyl)aniline (**3ia**)



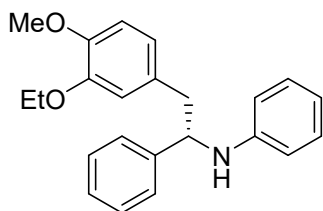

Following the general reaction procedure A, **3ia** was obtained from the (3-ethoxy-4-methoxybenzylidene)hydrazine (**1n**, 58.2 mg, 0.3 mmol, 1.5 equiv.) and *N*-benzylideneaniline (**2a**, 36.2 mg, 0.2 mmol, 1.0 equiv.), as a white solid (55.5 mg, 80%, 90:10 er), mp. 116-119 °C.

$R_f$  = 0.48 (Petroleum ether/Dichloromethane = 1:1).

**FT-IR** (neat,  $\text{cm}^{-1}$ ) 3389, 2918, 1602, 1506, 1260, 1139, 1029, 750, 700.

**$^1\text{H NMR}$**  (400 MHz,  $\text{CDCl}_3$ )  $\delta$  7.29 (d,  $J$  = 4.3 Hz, 4H), 7.22 (dd,  $J$  = 8.5, 4.2 Hz, 1H), 7.04 (dd,  $J$  = 8.3, 7.5 Hz, 2H), 6.77 (d,  $J$  = 8.1 Hz, 1H), 6.67 (dd,  $J$  = 8.1, 1.8 Hz, 1H), 6.62 (t,  $J$  = 7.3 Hz, 1H), 6.47 (dd,  $J$  = 11.0, 4.8 Hz, 3H), 4.54 (t,  $J$  = 6.7 Hz, 1H), 4.12 (s, 1H), 3.97-3.88 (m, 2H), 3.84 (s, 3H), 3.06 (dd,  $J$  = 13.9, 6.0 Hz, 1H), 2.96 (dd,  $J$  = 13.9, 7.6 Hz, 1H), 1.38 (t,  $J$  = 7.0 Hz, 3H).

**$^{13}\text{C NMR}$**  (101 MHz,  $\text{CDCl}_3$ )  $\delta$  148.3, 148.3, 147.5, 143.5, 130.1, 129.2, 128.7, 127.1, 126.7, 121.5, 117.6, 114.2, 113.8, 111.6, 64.3, 59.3, 56.1, 44.7, 14.9.

**HRMS**(ESI,  $m/z$ ), calcd for  $\text{C}_{23}\text{H}_{26}\text{O}_2\text{N}^+ [\text{M}+\text{H}]^+$ , 348.1958; found, 348.1952.

**HPLC analysis:** Chiracel OD-H, *n*-Hexane:*i*-PrOH = 94:6, 1.0 mL/min, UV = 254 nm. Retention time (min): 10.4 (minor) and 15.3 (major).

$[\alpha]_D^{20}$  = -48.64 ( $c$  = 1.0,  $\text{CHCl}_3$ , 90:10 er).

#### (*S*)-*N*-(2-(4-fluorophenyl)-1-phenylethyl)aniline (**3ja**)

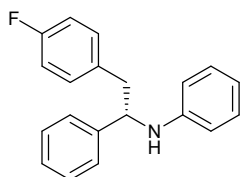

Following the general reaction procedure A, **3ja** was obtained from the (3-ethoxy-4-methoxybenzylidene)hydrazine (**1n**, 41.4 mg, 0.3 mmol, 1.5 equiv.) and *N*-benzylideneaniline (**2a**, 36.2 mg, 0.2 mmol, 1.0 equiv.), as a yellow oil (7.4 mg, 13%, 77:23 er).

$R_f$  = 0.69 (Petroleum ether/Dichloromethane = 1:1).

**FT-IR** (neat,  $\text{cm}^{-1}$ ) 3410, 3048, 2851, 1598, 1506, 1316, 1152, 844, 700.

**$^1\text{H NMR}$**  (400 MHz,  $\text{CDCl}_3$ )  $\delta$  7.33-7.20 (m, 5H), 7.16-6.99 (m, 4H), 6.94 (t,  $J$  = 8.6 Hz, 2H), 6.63 (t,  $J$  = 7.3 Hz, 1H), 6.47 (d,  $J$  = 7.7 Hz, 2H), 4.55 (t,  $J$  = 6.9 Hz, 1H), 4.08 (s, 1H), 3.05 (qd,  $J$  = 14.0, 7.0 Hz, 2H).

**$^{13}\text{C NMR}$**  (126 MHz,  $\text{CDCl}_3$ )  $\delta$  161.9 (d,  $J_{\text{C-F}}$  = 245.7 Hz), 147.3, 143.2, 133.5, 130.8 (d,  $J_{\text{C-F}}$  = 7.7 Hz), 129.2, 128.7, 127.3, 126.7, 117.8, 115.4 (d,  $J_{\text{C-F}}$  = 21.2 Hz), 113.8, 59.5, 44.3.

**$^{19}\text{F NMR}$**  (377 MHz,  $\text{CDCl}_3$ )  $\delta$  -116.2.

**HRMS**(ESI,  $m/z$ ), calcd for  $\text{C}_{20}\text{H}_{19}\text{NF}^+ [\text{M}+\text{H}]^+$ , 292.1496; found, 292.1507.

**HPLC analysis:** Chiracel OD-H, *n*-Hexane:*i*-PrOH = 98:2, 1.0 mL/min, UV = 254 nm. Retention time (min): 13.4 (minor) and 14.7 (major).

$[\alpha]_D^{20}$  = -32.04 ( $c$  = 1.0,  $\text{CHCl}_3$ , 77:23 er).

#### (*S*)-*N*-(2-(3-chloro-4-methoxyphenyl)-1-phenylethyl)aniline (**3ka**)

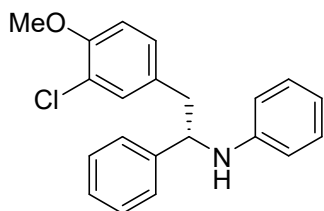

Following the general reaction procedure A, **3ka** was obtained from the (3-chloro-4-methoxybenzylidene)hydrazine (**1f**, 55.2 mg, 0.3 mmol, 1.5 equiv.) and *N*-benzylideneaniline (**2a**, 36.2 mg, 0.2 mmol, 1.0 equiv.), as a colorless oil (14.8 mg, 22%, 92:8 er).

$R_f = 0.58$  (Petroleum ether/Dichloromethane = 1:1).

**FT-IR** (neat,  $\text{cm}^{-1}$ ) 3566, 2335, 1603, 1507, 1265, 745.

**$^1\text{H NMR}$**  (500 MHz,  $\text{CDCl}_3$ )  $\delta$  7.37-7.26 (m, 4H), 7.26-7.19 (m, 1H), 7.10 (d,  $J = 1.6$  Hz, 1H), 7.06 (t,  $J = 7.8$  Hz, 2H), 6.93 (dd,  $J = 8.3, 1.5$  Hz, 1H), 6.80 (d,  $J = 8.4$  Hz, 1H), 6.63 (t,  $J = 7.3$  Hz, 1H), 6.47 (d,  $J = 8.0$  Hz, 2H), 4.60-4.44 (m, 1H), 4.07 (s, 1H), 3.87 (s, 3H), 3.03 (dd,  $J = 14.0, 5.9$  Hz, 1H), 2.94 (dd,  $J = 14.0, 7.9$  Hz, 1H).

**$^{13}\text{C NMR}$**  (126 MHz,  $\text{CDCl}_3$ )  $\delta$  153.9, 147.2, 143.1, 131.1, 130.9, 129.2, 128.8, 128.5, 127.3, 126.6, 122.4, 117.8, 113.8, 112.2, 59.3, 56.3, 44.0.

**HRMS**(ESI,  $m/z$ ), calcd for  $\text{C}_{21}\text{H}_{21}\text{ONCl}^+$  [ $\text{M}+\text{H}$ ] $^+$ , 338.1306; found, 338.1302.

**HPLC analysis:** Chiracel OD-H, *n*-Hexane:*i*-PrOH = 95:5, 1.0 mL/min, UV = 254 nm. Retention time (min): 11.9 (minor) and 16.8 (major).

$[\alpha]_D^{20} = -87.36$  ( $c = 1.0$ ,  $\text{CHCl}_3$ , 92:8 er).

#### (*S*)-*N*-(2-(2-chloro-3-methoxyphenyl)-1-phenylethyl)aniline (**3la**)

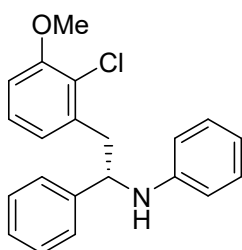

Following the general reaction procedure A, **3la** was obtained from the (2-chloro-3-methoxybenzylidene)hydrazine (**1g**, 55.2 mg, 0.3 mmol, 1.5 equiv.) and *N*-benzylideneaniline (**2a**, 36.2 mg, 0.2 mmol, 1.0 equiv.), as a yellow oil (34.4 mg, 51%, 90:10 er).

$R_f = 0.57$  (Petroleum ether/Dichloromethane = 1:1).

**FT-IR** (neat,  $\text{cm}^{-1}$ ) 3421, 3051, 1602, 1503, 1265, 1074, 744, 701.

**$^1\text{H NMR}$**  (400 MHz,  $\text{CDCl}_3$ )  $\delta$  7.39 (d,  $J = 7.4$  Hz, 2H), 7.31 (t,  $J = 7.5$  Hz, 2H), 7.26-7.20 (m, 1H), 7.11 (t,  $J = 7.9$  Hz, 1H), 7.02 (t,  $J = 7.8$  Hz, 2H), 6.81 (d,  $J = 8.0$  Hz, 1H), 6.75 (d,  $J = 7.6$  Hz, 1H), 6.60 (t,  $J = 7.3$  Hz, 1H), 6.45 (d,  $J = 8.2$  Hz, 2H), 4.69 (dd,  $J = 8.6, 5.6$  Hz, 1H), 4.27 (s, 1H), 3.89 (s, 3H), 3.22 (dd,  $J = 14.4, 5.8$  Hz, 1H), 3.19-3.12 (m, 1H).

**$^{13}\text{C NMR}$**  (101 MHz,  $\text{CDCl}_3$ )  $\delta$  155.4, 147.3, 143.7, 137.6, 129.0, 128.6, 127.2, 127.0, 126.3, 123.1, 122.8, 117.4, 113.6, 110.5, 58.1, 56.3, 43.1.

**HRMS**(ESI,  $m/z$ ), calcd for  $\text{C}_{21}\text{H}_{21}\text{ONCl}^+$  [ $\text{M}+\text{H}$ ] $^+$ , 338.1306; found, 338.1300.

**HPLC analysis:** Chiracel OD-H, *n*-Hexane:*i*-PrOH = 98:2, 1.0 mL/min, UV = 254 nm. Retention time (min): 13.4 (minor) and 17.6 (major).

$[\alpha]_D^{20} = -50.76$  ( $c = 1.0$ ,  $\text{CHCl}_3$ , 90:10 er).

#### (*S*)-*N*-(2-(furan-2-yl)-1-phenylethyl)aniline (**3ma**)

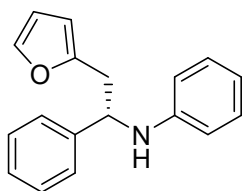

Following the general reaction procedure A, **3ma** was obtained from the (furan-2-ylmethylene)hydrazine (**1s**, 33.0 mg, 0.3 mmol, 1.5 equiv.) and *N*-benzylideneaniline (**2a**, 36.2 mg, 0.2 mmol, 1.0 equiv.), as a colorless oil (20.6 mg, 39%, 87:13 er).

$R_f$  = 0.67 (Petroleum ether/Dichloromethane = 1:1).

**FT-IR** (neat,  $\text{cm}^{-1}$ ) 3412, 3027, 2919, 2851, 1602, 1504, 1317, 1007, 750, 699.

**$^1\text{H NMR}$**  (400 MHz,  $\text{CDCl}_3$ )  $\delta$  7.43-7.26 (m, 5H), 7.23 (s, 1H), 7.10-7.01 (m, 2H), 6.64 (t,  $J$  = 7.3 Hz, 1H), 6.49 (d,  $J$  = 7.7 Hz, 2H), 6.31-6.22 (m, 1H), 6.02 (d,  $J$  = 3.0 Hz, 1H), 4.63 (dd,  $J$  = 8.4, 5.2 Hz, 1H), 4.30 (s, 1H), 3.13 (dd,  $J$  = 15.2, 5.1 Hz, 1H), 3.04 (dd,  $J$  = 15.2, 8.4 Hz, 1H).

**$^{13}\text{C NMR}$**  (101 MHz,  $\text{CDCl}_3$ )  $\delta$  152.2, 147.4, 143.3, 142.0, 129.2, 128.8, 127.3, 126.4, 117.7, 113.8, 110.5, 107.6, 57.7, 37.5.

**HRMS**(ESI,  $m/z$ ), calcd for  $\text{C}_{18}\text{H}_{18}\text{ON}^+$  [ $\text{M}+\text{H}$ ] $^+$ , 264.1383; found, 264.1379.

**HPLC analysis**: Chiracel OD-H, *n*-Hexane:*i*-PrOH = 98:2, 1.0 mL/min, UV = 254 nm. Retention time (min): 7.7 (minor) and 8.8 (major).

$[\alpha]_D^{20}$  = -22.24 ( $c$  = 1.0,  $\text{CHCl}_3$ , 87:13 er).

### (*S*)-*N*-(1-phenyl-2-(thiophen-2-yl)ethyl)aniline (**3na**)

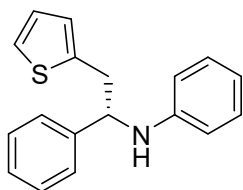

Following the general reaction procedure A, **3na** was obtained from the (thiophen-2-ylmethylene)hydrazine (**1r**, 37.8 mg, 0.3 mmol, 1.5 equiv.) and *N*-benzylideneaniline (**2a**, 36.2 mg, 0.2 mmol, 1.0 equiv.), as a yellow oil (19.4 mg, 35%, 86:14 er).

$R_f$  = 0.76 (Petroleum ether/Dichloromethane = 1:1).

**FT-IR** (neat,  $\text{cm}^{-1}$ ) 3403, 2922, 2851, 1601, 1504, 1317, 750, 692.

**$^1\text{H NMR}$**  (300 MHz,  $\text{CDCl}_3$ )  $\delta$  7.40-7.22 (m, 5H), 7.14 (d,  $J$  = 4.4 Hz, 1H), 7.07 (t,  $J$  = 7.9 Hz, 2H), 6.91 (dd,  $J$  = 5.0, 3.5 Hz, 1H), 6.78 (d,  $J$  = 2.9 Hz, 1H), 6.65 (t,  $J$  = 7.3 Hz, 1H), 6.49 (d,  $J$  = 7.8 Hz, 2H), 4.59 (dd,  $J$  = 7.8, 5.6 Hz, 1H), 4.17 (s, 1H), 3.34 (dd,  $J$  = 14.9, 5.4 Hz, 1H), 3.25 (dd,  $J$  = 15.0, 8.1 Hz, 1H).

**$^{13}\text{C NMR}$**  (101 MHz,  $\text{CDCl}_3$ )  $\delta$  147.3, 143.1, 140.2, 129.2, 128.8, 127.4, 127.0, 126.6, 126.3, 124.6, 117.8, 113.8, 59.5, 39.1.

**HRMS**(ESI,  $m/z$ ), calcd for  $\text{C}_{18}\text{H}_{18}\text{NS}^+$  [ $\text{M}+\text{H}$ ] $^+$ , 280.1155; found, 280.1152.

**HPLC analysis**: Chiracel OD-H, *n*-Hexane:*i*-PrOH = 98:2, 1.0 mL/min, UV = 254 nm. Retention time (min): 9.1 (minor) and 11.0 (major).

$[\alpha]_D^{20}$  = -25.58 ( $c$  = 1.0,  $\text{CHCl}_3$ , 86:14 er).

### (*S*)-*N*-(1-phenylheptyl)aniline (**3oa**)

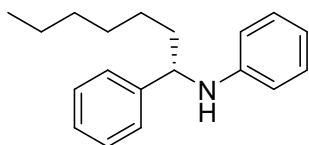

Following the general reaction procedure A, **3oa** was obtained from the heptylidenehydrazine (**1y**, 30.0 mg, 0.3 mmol, 1.5 equiv.) and *N*-benzylideneaniline (**2a**, 36.2 mg, 0.2 mmol, 1.0 equiv.), as a colorless oil (4.7 mg, 9%, 66:34 er).

$R_f$  = 0.65 (Petroleum ether/Dichloromethane = 1:1).

**FT-IR** (neat,  $\text{cm}^{-1}$ ) 3595, 2922, 2357, 1622, 1276, 1260, 750.

**<sup>1</sup>H NMR** (500 MHz, CDCl<sub>3</sub>) δ 7.31 (dt, *J* = 15.0, 7.4 Hz, 4H), 7.21 (t, *J* = 6.9 Hz, 1H), 7.07 (t, *J* = 7.8 Hz, 2H), 6.62 (t, *J* = 7.2 Hz, 1H), 6.50 (d, *J* = 7.9 Hz, 2H), 4.28 (t, *J* = 6.8 Hz, 1H), 4.06 (s, 1H), 1.83-1.72 (m, 2H), 1.39 (d, *J* = 14.0 Hz, 1H), 1.32-1.23 (m, 7H), 0.86 (t, *J* = 6.8 Hz, 4H).

**<sup>13</sup>C NMR** (126 MHz, CDCl<sub>3</sub>) δ 147.7, 144.5, 129.2, 128.7, 127.0, 126.5, 117.2, 113.4, 58.4, 39.2, 31.9, 29.3, 26.5, 22.7, 14.2.

**HRMS**(ESI, *m/z*), calcd for C<sub>19</sub>H<sub>24</sub>N<sup>+</sup> [M-H]<sup>+</sup>, 266.1903; found, 266.1898.

**HPLC analysis:** Chiracel OD-H, *n*-Hexane:*i*-PrOH = 98:2, 1.0 mL/min, UV = 254 nm. Retention time (min): 5.4 (minor) and 6.3 (major).

[α]<sub>D</sub><sup>20</sup> = -42.35 (c = 1.0, CHCl<sub>3</sub>, 66:34 er).

### (*S*)-*N*-(1-(4-fluorophenyl)-2-phenylethyl)aniline (**3ab**)

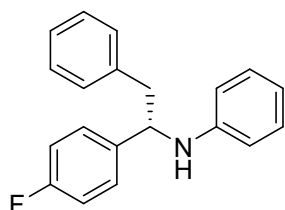

Following the general reaction procedure A, **3ab** was obtained from the benzaldehyde hydrazone (**1a**, 34 μL, 0.3 mmol, 1.5 equiv.) and 1-(4-fluorophenyl)-*N*-phenylmethanimine (**2f**, 39.8 mg, 0.2 mmol, 1.0 equiv.), as a yellow oil (47.1 mg, 81%, 90:10 er).

*R*<sub>f</sub> = 0.79 (Petroleum ether/Dichloromethane = 1:1).

**FT-IR** (neat, cm<sup>-1</sup>) 3412, 3052, 3027, 2922, 2851, 1600, 1506, 1316, 1265, 1220, 1154, 832, 750, 692.

**<sup>1</sup>H NMR** (400 MHz, CDCl<sub>3</sub>) δ 7.31-7.17 (m, 5H), 7.11-7.01 (m, 4H), 6.97 (t, *J* = 8.7 Hz, 2H), 6.63 (t, *J* = 7.3 Hz, 1H), 6.43 (d, *J* = 7.8 Hz, 2H), 4.56 (t, *J* = 6.9 Hz, 1H), 4.10 (s, 1H), 3.07 (dd, *J* = 13.9, 6.1 Hz, 1H), 3.00 (dd, *J* = 13.9, 7.9 Hz, 1H).

**<sup>13</sup>C NMR** (101 MHz, CDCl<sub>3</sub>) δ 162.0 (d, *J*<sub>C-F</sub> = 244.7 Hz), 147.2, 139.1 (d, *J*<sub>C-F</sub> = 3.0 Hz), 137.5, 129.3 (d, *J*<sub>C-F</sub> = 17.8 Hz), 128.7, 128.1, 128.0, 127.0, 117.8, 115.5 (d, *J*<sub>C-F</sub> = 21.4 Hz), 113.8, 58.8, 45.4.

**<sup>19</sup>F NMR** (377 MHz, CDCl<sub>3</sub>) δ -115.9.

**HRMS**(ESI, *m/z*), calcd for C<sub>20</sub>H<sub>19</sub>NF<sup>+</sup> [M+H]<sup>+</sup>, 292.1496; found, 292.1495.

**HPLC analysis:** Chiracel OD-H, *n*-Hexane:*i*-PrOH = 97:3, 1.0 mL/min, UV = 254 nm. Retention time (min): 9.7 (minor) and 13.5 (major).

[α]<sub>D</sub><sup>20</sup> = -57.12 (c = 1.0, CHCl<sub>3</sub>, 90:10 er).

### (*S*)-*N*-(1-(4-bromophenyl)-2-phenylethyl)aniline (**3ac**)

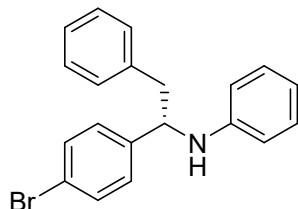

Following the general reaction procedure A, **3ac** was obtained from the benzaldehyde hydrazone (**1a**, 34 μL, 0.3 mmol, 1.5 equiv.) and 1-(4-bromophenyl)-*N*-phenylmethanimine (**2h**, 51.8 mg, 0.2 mmol, 1.0 equiv.), as a yellowish oil (61.8 mg, 88%, 90:10 er).

*R*<sub>f</sub> = 0.67 (Petroleum ether/Dichloromethane = 1:1).

**FT-IR** (neat, cm<sup>-1</sup>) 3412, 3052, 3026, 2919, 1601, 1506, 1029, 749, 692.

**<sup>1</sup>H NMR** (500 MHz, CDCl<sub>3</sub>) δ 7.41 (d, *J* = 8.1 Hz, 2H), 7.25 (dq, *J* = 14.9, 7.3 Hz, 3H), 7.17 (d, *J* = 8.1 Hz, 2H), 7.09 (d, *J* = 7.2 Hz, 2H), 7.05 (t, *J* = 7.6 Hz, 2H), 6.64 (t, *J* = 7.3 Hz, 1H), 6.41 (d, *J* = 7.8 Hz, 2H), 4.53 (t, *J* = 6.1 Hz, 1H), 4.09 (s, 1H), 3.08 (dd, *J* = 13.9, 5.8 Hz, 1H), 2.99 (dd, *J* = 13.8, 8.0 Hz, 1H).

**<sup>13</sup>C NMR** (126 MHz, CDCl<sub>3</sub>) δ 147.1, 142.6, 137.3, 131.8, 129.3, 129.2, 128.8, 128.4, 127.0, 120.9, 117.9, 113.8, 58.9, 45.2.

**HRMS**(ESI, *m/z*), calcd for C<sub>20</sub>H<sub>19</sub>NBr<sup>+</sup> [M+H]<sup>+</sup>, 352.0695; found, 352.0694.

**HPLC analysis:** Chiracel OD-H, *n*-Hexane:*i*-PrOH = 97:3, 1.0 mL/min, UV = 254 nm. Retention time (min): 10.9 (minor) and 14.7 (major).

$[\alpha]_D^{20} = -44.98$  (c = 1.0, CHCl<sub>3</sub>, 90:10 er).

**(S)-N-(1-(4-iodophenyl)-2-phenylethyl)aniline (3ad)**

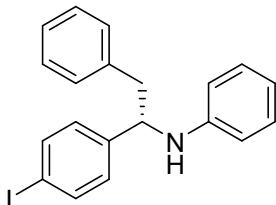

Following the general reaction procedure A, **3ad** was obtained from the benzaldehyde hydrazone (**1a**, 34  $\mu$ L, 0.3 mmol, 1.5 equiv.) and 1-(4-iodophenyl)-*N*-phenylmethanimine (**2i**, 61.4 mg, 0.2 mmol, 1.0 equiv.), as a yellowish oil (50.3 mg, 63%, 86:14 er).

$R_f = 0.63$  (Petroleum ether/Dichloromethane = 1:1).

**FT-IR** (neat, cm<sup>-1</sup>) 3407, 3051, 3025, 2922, 1601, 1506, 1318, 1265, 1005, 749, 692.

**<sup>1</sup>H NMR** (400 MHz, CDCl<sub>3</sub>)  $\delta$  7.61 (d,  $J = 8.3$  Hz, 2H), 7.26 (dt,  $J = 10.5, 6.9$  Hz, 3H), 7.16-6.95 (m, 6H), 6.64 (t,  $J = 7.3$  Hz, 1H), 6.41 (d,  $J = 7.8$  Hz, 2H), 4.58-4.44 (m, 1H), 4.09 (s, 1H), 3.08 (dd,  $J = 13.9, 5.9$  Hz, 1H), 2.98 (dd,  $J = 13.9, 8.1$  Hz, 1H).

**<sup>13</sup>C NMR** (101 MHz, CDCl<sub>3</sub>)  $\delta$  147.1, 143.4, 137.8, 137.3, 129.3, 129.2, 128.8, 128.7, 127.0, 117.9, 113.8, 92.4, 59.0, 45.2.

**HRMS**(ESI,  $m/z$ ), calcd for C<sub>20</sub>H<sub>19</sub>NI<sup>+</sup> [M+H]<sup>+</sup>, 400.0557; found, 400.0556.

**HPLC analysis:** Chiracel OD-H, *n*-Hexane:*i*-PrOH = 95:5, 1.0 mL/min, UV = 254 nm. Retention time (min): 10.5 (minor) and 13.8 (major).

$[\alpha]_D^{20} = -37.48$  (c = 1.0, CHCl<sub>3</sub>, 86:14 er).

**(S)-N-(2-phenyl-1-(4-(trifluoromethyl)phenyl)ethyl)aniline (3ae)**

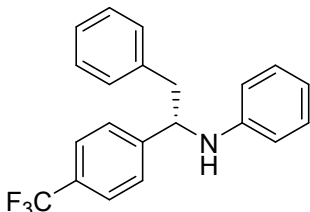

Following the general reaction procedure A, **3ae** was obtained from the benzaldehyde hydrazone (**1a**, 34  $\mu$ L, 0.3 mmol, 1.5 equiv.) and *N*-phenyl-1-(4-(trifluoromethyl)phenyl)methanimine (**2p**, 49.8 mg, 0.2 mmol, 1.0 equiv.), as a colorless oil (57.2 mg, 84%, 91:9 er).

$R_f = 0.80$  (Petroleum ether/Dichloromethane = 1:1).

**FT-IR** (neat, cm<sup>-1</sup>) 3412, 3027, 2921, 1602, 1506, 1419, 1325, 1121, 1066, 749, 692.

**<sup>1</sup>H NMR** (400 MHz, CDCl<sub>3</sub>)  $\delta$  7.55 (d,  $J = 8.1$  Hz, 2H), 7.43 (d,  $J = 8.1$  Hz, 2H), 7.26 (dt,  $J = 6.8, 6.0$  Hz, 3H), 7.10 (d,  $J = 6.9$  Hz, 2H), 7.05 (t,  $J = 7.9$  Hz, 2H), 6.65 (t,  $J = 7.3$  Hz, 1H), 6.41 (d,  $J = 7.9$  Hz, 2H), 4.63 (t,  $J = 6.7$  Hz, 1H), 4.14 (s, 1H), 3.12 (dd,  $J = 14.0, 5.8$  Hz, 1H), 3.01 (dd,  $J = 13.9, 8.2$  Hz, 1H).

**<sup>13</sup>C NMR** (101 MHz, CDCl<sub>3</sub>)  $\delta$  147.8, 147.0, 137.1, 129.7, 129.3, 129.2, 128.9, 127.2, 127.0, 125.73 (q,  $J_{C-F} = 3.8$  Hz), 123.0, 118.1, 113.8, 59.1, 45.1.

**<sup>19</sup>F NMR** (377 MHz, CDCl<sub>3</sub>)  $\delta$  -62.3.

**HRMS**(ESI,  $m/z$ ), calcd for C<sub>21</sub>H<sub>19</sub>NF<sub>3</sub><sup>+</sup> [M+H]<sup>+</sup>, 342.1464; found, 342.1461.

**HPLC analysis:** Chiracel OD-H, *n*-Hexane:*i*-PrOH = 98:2, 1.0 mL/min, UV = 254 nm. Retention time (min): 13.8 (minor) and 19.4 (major).

$[\alpha]_D^{20} = -57.75$  (c = 1.0, CHCl<sub>3</sub>, 91:9 er).

**(S)-N-(2-phenyl-1-(4-(trifluoromethoxy)phenyl)ethyl)aniline (3af)**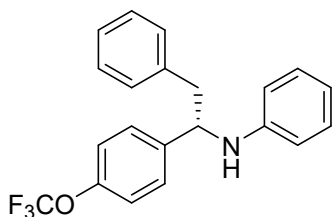

Following the general reaction procedure A, **3af** was obtained from the benzaldehyde hydrazone (**1a**, 34  $\mu$ L, 0.3 mmol, 1.5 equiv.) and *N*-phenyl-1-(4-(trifluoromethoxy)phenyl)methanimine (**2q**, 53.0 mg, 0.2 mmol, 1.0 equiv.), as a yellow oil (57.8 mg, 81%, 89:11 er).

$R_f$  = 0.76 (Petroleum ether/Dichloromethane = 1:1).

**FT-IR** (neat,  $\text{cm}^{-1}$ ) 3412, 3053, 1602, 1506, 1260, 1164, 749, 692.

**$^1\text{H}$  NMR** (500 MHz,  $\text{CDCl}_3$ )  $\delta$  7.33 (d,  $J$  = 8.4 Hz, 2H), 7.30-7.20 (m, 3H), 7.14 (d,  $J$  = 8.2 Hz, 2H), 7.11-7.01 (m, 4H), 6.65 (t,  $J$  = 7.2 Hz, 1H), 6.43 (d,  $J$  = 8.1 Hz, 2H), 4.58 (s, 1H), 4.11 (s, 1H), 3.09 (dd,  $J$  = 13.9, 5.7 Hz, 1H), 3.00 (dd,  $J$  = 13.9, 8.2 Hz, 1H).

**$^{13}\text{C}$  NMR** (126 MHz,  $\text{CDCl}_3$ )  $\delta$  148.3, 147.1, 142.3, 137.3, 129.3, 129.2, 128.8, 127.9, 127.1, 121.2, 120.6 (d,  $J_{\text{C-F}}$  = 256.8 Hz), 118.0, 113.8, 58.8, 45.3.

**$^{19}\text{F}$  NMR** (377 MHz,  $\text{CDCl}_3$ )  $\delta$  -57.8.

**HRMS**(ESI,  $m/z$ ), calcd for  $\text{C}_{21}\text{H}_{19}\text{ONF}_3^+$  [ $\text{M}+\text{H}$ ] $^+$ , 358.1413; found, 358.1410.

**HPLC analysis:** Chiracel OD-H, *n*-Hexane:*i*-PrOH = 98:2, 1.0 mL/min, UV = 254 nm. Retention time (min): 10.8 (minor) and 15.6 (major).

$[\alpha]_D^{20}$  = -54.50 (c = 1.0,  $\text{CHCl}_3$ , 89:11 er).

**(S)-N-(1-(4-methoxyphenyl)-2-phenylethyl)aniline (3ag)**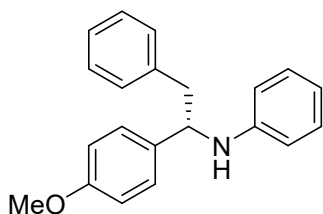

Following the general reaction procedure A, **3ag** was obtained from the benzaldehyde hydrazone (**1a**, 34  $\mu$ L, 0.3 mmol, 1.5 equiv.) and 1-(4-methoxyphenyl)-*N*-phenylmethanimine (**2b**, 42.2 mg, 0.2 mmol, 1.0 equiv.), as a colorless oil (26.7 mg, 44%, 88:12 er).

$R_f$  = 0.64 (Petroleum ether/Dichloromethane = 1:1).

**FT-IR** (neat,  $\text{cm}^{-1}$ ) 3404, 2922, 2834, 1601, 1507, 1245, 1178, 1031, 828, 749, 692.

**$^1\text{H}$  NMR** (400 MHz,  $\text{CDCl}_3$ )  $\delta$  7.29-7.14 (m, 5H), 7.10 (d,  $J$  = 7.0 Hz, 2H), 7.05 (t,  $J$  = 7.9 Hz, 2H), 6.83 (d,  $J$  = 8.6 Hz, 2H), 6.62 (t,  $J$  = 7.3 Hz, 1H), 6.46 (d,  $J$  = 7.9 Hz, 2H), 4.60-4.46 (m, 1H), 4.08 (s, 1H), 3.78 (s, 3H), 3.09 (dd,  $J$  = 13.9, 5.9 Hz, 1H), 3.00 (dd,  $J$  = 13.9, 7.9 Hz, 1H).

**$^{13}\text{C}$  NMR** (101 MHz,  $\text{CDCl}_3$ )  $\delta$  158.7, 147.5, 137.9, 135.5, 129.4, 129.1, 128.6, 127.6, 126.8, 117.6, 114.1, 113.8, 58.8, 55.4, 45.4.

**HRMS**(ESI,  $m/z$ ), calcd for  $\text{C}_{21}\text{H}_{22}\text{ON}^+$  [ $\text{M}+\text{H}$ ] $^+$ , 304.1696; found, 304.1695.

**HPLC analysis:** Chiracel OD-H, *n*-Hexane:*i*-PrOH = 96:4, 1.0 mL/min, UV = 254 nm. Retention time (min): 8.7 (minor) and 11.1 (major).

$[\alpha]_D^{20}$  = -60.82 (c = 1.0,  $\text{CHCl}_3$ , 88:12 er).

**(S)-N-(2-phenyl-1-(*p*-tolyl)ethyl)aniline (3ah)**

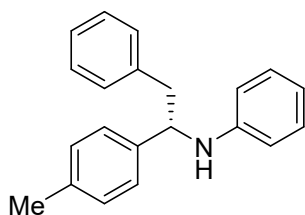

Following the general reaction procedure A, **3ah** was obtained from the benzaldehyde hydrazone (**1a**, 34  $\mu$ L, 0.3 mmol, 1.5 equiv.) and *N*-phenyl-1-(*p*-tolyl)methanimine (**2c**, 39.0 mg, 0.2 mmol, 1.0 equiv.), as a colorless oil (21.3 mg, 37%, 86:14 er).

$R_f$  = 0.71 (Petroleum ether/Dichloromethane = 1:1).

**FT-IR** (neat,  $\text{cm}^{-1}$ ) 3027, 2918, 1602, 1506, 749.

**$^1\text{H NMR}$**  (300 MHz,  $\text{CDCl}_3$ )  $\delta$  7.30-7.18 (m, 5H), 7.12 (dd,  $J$  = 10.1, 4.5 Hz, 4H), 7.04 (dd,  $J$  = 8.4, 7.5 Hz, 2H), 6.61 (t,  $J$  = 7.3 Hz, 1H), 6.45 (d,  $J$  = 7.7 Hz, 2H), 4.62-4.46 (m, 1H), 4.08 (s, 1H), 3.12 (dd,  $J$  = 14.0, 5.6 Hz, 1H), 2.99 (dd,  $J$  = 14.0, 8.2 Hz, 1H), 2.32 (s, 3H).

**$^{13}\text{C NMR}$**  (126 MHz,  $\text{CDCl}_3$ )  $\delta$  147.5, 140.6, 138.0, 136.7, 129.4, 129.3, 129.1, 128.7, 126.8, 126.5, 117.5, 113.8, 59.1, 45.3, 21.2.

**HRMS**(ESI,  $m/z$ ), calcd for  $\text{C}_{21}\text{H}_{22}\text{N}^+ [\text{M}+\text{H}]^+$ , 288.1747; found, 288.1746.

**HPLC analysis:** Chiracel OD-H, *n*-Hexane:*i*-PrOH = 98:2, 1.0 mL/min, UV = 254 nm. Retention time (min): 7.2 (minor) and 8.9 (major).

$[\alpha]_D^{20}$  = -43.08 ( $c$  = 1.0,  $\text{CHCl}_3$ , 86:14 er).

#### (*S*)-*N*-(2-phenyl-1-(2-(trifluoromethyl)phenyl)ethyl)aniline (**3ai**)

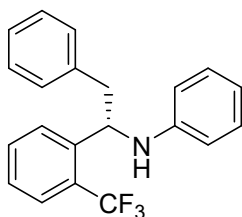

Following the general reaction procedure A, **3ai** was obtained from the benzaldehyde hydrazone (**1a**, 34  $\mu$ L, 0.3 mmol, 1.5 equiv.) and *N*-phenyl-1-(2-(trifluoromethyl)phenyl)methanimine (**2o**, 49.8 mg, 0.2 mmol, 1.0 equiv.), as a yellow oil (16.6 mg, 24%, 84:16 er).

$R_f$  = 0.78 (Petroleum ether/Dichloromethane = 1:1).

**FT-IR** (neat,  $\text{cm}^{-1}$ ) 2922, 2325, 1647, 1539, 1312, 750.

**$^1\text{H NMR}$**  (500 MHz,  $\text{CDCl}_3$ )  $\delta$  7.74 (t,  $J$  = 8.3 Hz, 2H), 7.48 (t,  $J$  = 7.5 Hz, 1H), 7.40-7.29 (m, 3H), 7.29-7.19 (m, 3H), 7.00 (t,  $J$  = 7.8 Hz, 2H), 6.61 (t,  $J$  = 7.3 Hz, 1H), 6.39 (d,  $J$  = 7.8 Hz, 2H), 5.03 (d,  $J$  = 9.6 Hz, 1H), 4.12 (s, 1H), 3.30 (d,  $J$  = 14.4 Hz, 1H), 2.70 (dd,  $J$  = 14.3, 10.2 Hz, 1H).

**$^{13}\text{C NMR}$**  (126 MHz,  $\text{CDCl}_3$ )  $\delta$  146.9, 143.5, 137.7, 132.7, 129.2, 129.1, 129.0, 127.6, 127.3 (dd,  $J_{\text{C-F}}$  = 24.0, 5.8 Hz), 126.4 (q,  $J_{\text{C-F}}$  = 6.0 Hz), 126.1, 123.9, 121.7, 118.0, 113.7, 55.1, 45.2.

**$^{19}\text{F NMR}$**  (377 MHz,  $\text{CDCl}_3$ )  $\delta$  -58.1.

**HRMS**(ESI,  $m/z$ ), calcd for  $\text{C}_{21}\text{H}_{19}\text{NF}_3^+ [\text{M}+\text{H}]^+$ , 342.1464; found, 342.1464.

**HPLC analysis:** Chiracel OD-H, *n*-Hexane:*i*-PrOH = 99.3:0.7, 1.0 mL/min, UV = 254 nm. Retention time (min): 6.0 (minor) and 7.0 (major).

$[\alpha]_D^{20}$  = -66.38 ( $c$  = 1.0,  $\text{CHCl}_3$ , 84:16 er).

#### (*S*)-*N*-(1-(3-fluorophenyl)-2-phenylethyl)aniline (**3aj**)

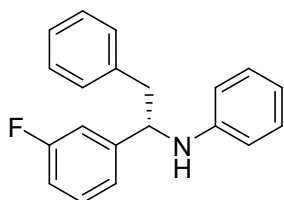

Following the general reaction procedure A, **3aj** was obtained from the benzaldehyde hydrazone (**1a**, 34  $\mu$ L, 0.3 mmol, 1.5 equiv.) and 1-(3-fluorophenyl)-*N*-phenylmethanimine (**2j**, 39.8 mg, 0.2 mmol, 1.0 equiv.), as a yellow oil (38.7 mg, 66%, 82:18 er).

$R_f = 0.75$  (Petroleum ether/Dichloromethane = 1:1).

**FT-IR** (neat,  $\text{cm}^{-1}$ ) 3412, 3053, 3027, 2921, 2851, 1602, 1506, 1316, 1263, 750, 692.

**$^1\text{H NMR}$**  (300 MHz,  $\text{CDCl}_3$ )  $\delta$  7.26 (dt,  $J = 9.5, 6.8$  Hz, 4H), 7.15-6.98 (m, 6H), 6.91 (td,  $J = 8.4, 2.0$  Hz, 1H), 6.64 (t,  $J = 7.3$  Hz, 1H), 6.44 (d,  $J = 7.9$  Hz, 2H), 4.57 (t,  $J = 6.6$  Hz, 1H), 4.10 (s, 1H), 3.11 (dd,  $J = 13.9, 5.7$  Hz, 1H), 3.00 (dd,  $J = 13.9, 8.2$  Hz, 1H).

**$^{13}\text{C NMR}$**  (126 MHz,  $\text{CDCl}_3$ )  $\delta$  163.3 (d,  $J_{\text{C-F}} = 245.8$  Hz), 147.1, 146.6 (d,  $J_{\text{C-F}} = 6.4$  Hz), 137.3, 130.2 (d,  $J_{\text{C-F}} = 8.1$  Hz), 129.3 (d,  $J_{\text{C-F}} = 13.2$  Hz), 128.8, 127.0, 122.3, 122.2, 117.9, 114.1 (d,  $J_{\text{C-F}} = 21.3$  Hz), 113.8, 113.4 (d,  $J_{\text{C-F}} = 21.8$  Hz), 59.0 (d,  $J_{\text{C-F}} = 1.5$  Hz), 45.2.

**$^{19}\text{F NMR}$**  (377 MHz,  $\text{CDCl}_3$ )  $\delta$  -112.9.

**HRMS**(ESI,  $m/z$ ), calcd for  $\text{C}_{20}\text{H}_{19}\text{NF}^+ [\text{M}+\text{H}]^+$ , 292.1496; found, 292.1494.

**HPLC analysis:** Chiracel OD-H, *n*-Hexane:*i*-PrOH = 97:3, 1.0 mL/min, UV = 254 nm. Retention time (min): 10.2 (minor) and 14.2 (major).

$[\alpha]_D^{20} = -47.66$  ( $c = 1.0$ ,  $\text{CHCl}_3$ , 82:18 er).

#### (*S*)-*N*-(1-(3-bromophenyl)-2-phenylethyl)aniline (**3ak**)

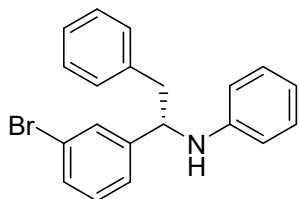

Following the general reaction procedure A, **3ak** was obtained from the benzaldehyde hydrazone (**1a**, 34  $\mu$ L, 0.3 mmol, 1.5 equiv.) and 1-(3-bromophenyl)-*N*-phenylmethanimine (**2k**, 51.8 mg, 0.2 mmol, 1.0 equiv.), as a yellowish oil (52.6 mg, 75%, 83:17 er).

$R_f = 0.69$  (Petroleum ether/Dichloromethane = 1:1).

**FT-IR** (neat,  $\text{cm}^{-1}$ ) 3420, 3052, 3026, 1601, 1506, 1264, 749, 693.

**$^1\text{H NMR}$**  (400 MHz,  $\text{CDCl}_3$ )  $\delta$  7.49 (s, 1H), 7.36 (d,  $J = 7.8$  Hz, 1H), 7.32-7.20 (m, 4H), 7.16 (t,  $J = 7.7$  Hz, 1H), 7.11 (d,  $J = 7.0$  Hz, 2H), 7.06 (t,  $J = 7.9$  Hz, 2H), 6.65 (t,  $J = 7.3$  Hz, 1H), 6.43 (d,  $J = 8.0$  Hz, 2H), 4.51 (d,  $J = 8.3$  Hz, 1H), 4.09 (s, 1H), 3.10 (dd,  $J = 14.0, 5.6$  Hz, 1H), 2.98 (dd,  $J = 14.0, 8.4$  Hz, 1H).

**$^{13}\text{C NMR}$**  (101 MHz,  $\text{CDCl}_3$ )  $\delta$  147.1, 146.3, 137.3, 130.4, 130.3, 129.6, 129.3, 129.2, 128.8, 127.1, 125.3, 122.9, 118.0, 113.8, 59.1, 45.3.

**HRMS**(ESI,  $m/z$ ), calcd for  $\text{C}_{20}\text{H}_{19}\text{NBr}^+ [\text{M}+\text{H}]^+$ , 352.0695; found, 352.0694.

**HPLC analysis:** Chiracel OD-H, *n*-Hexane:*i*-PrOH = 95:5, 1.0 mL/min, UV = 254 nm. Retention time (min): 9.2 (minor) and 12.2 (major).

$[\alpha]_D^{20} = -49.36$  ( $c = 1.0$ ,  $\text{CHCl}_3$ , 83:17 er).

#### (*S*)-*N*-(1-(3-chloro-4-fluorophenyl)-2-phenylethyl)aniline (**3al**)



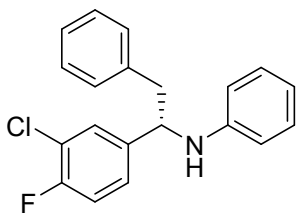

Following the general reaction procedure A, **3al** was obtained from the benzaldehyde hydrazone (**1a**, 34  $\mu\text{L}$ , 0.3 mmol, 1.5 equiv.) and 1-(3-chloro-4-fluorophenyl)-*N*-phenylmethanimine (**2l**, 46.6 mg, 0.2 mmol, 1.0 equiv.), as a yellow oil (46.8 mg, 72%, 86:14 er).

$R_f$  = 0.71 (Petroleum ether/Dichloromethane = 1:1).

**FT-IR** (neat,  $\text{cm}^{-1}$ ) 3411, 3027, 2919, 1602, 1506, 1317, 1260, 749, 692.

**$^1\text{H NMR}$**  (300 MHz,  $\text{CDCl}_3$ )  $\delta$  7.35 (dd,  $J$  = 7.0, 2.0 Hz, 1H), 7.32-7.20 (m, 3H), 7.16-6.98 (m, 6H), 6.66 (t,  $J$  = 7.3 Hz, 1H), 6.41 (d,  $J$  = 7.7 Hz, 2H), 4.51 (t,  $J$  = 6.7 Hz, 1H), 4.09 (s, 1H), 3.06 (dd,  $J$  = 13.9, 6.0 Hz, 1H), 2.98 (dd,  $J$  = 13.9, 8.0 Hz, 1H).

**$^{13}\text{C NMR}$**  (126 MHz,  $\text{CDCl}_3$ )  $\delta$  157.2 (d,  $J_{\text{C-F}}$  = 247.8 Hz), 146.9, 140.8 (d,  $J_{\text{C-F}}$  = 3.6 Hz), 137.0, 129.1, 129.2, 128.8, 128.6, 127.2, 126.2 (d,  $J_{\text{C-F}}$  = 7.1 Hz), 121.2 (d,  $J_{\text{C-F}}$  = 17.8 Hz), 118.1, 116.7 (d,  $J_{\text{C-F}}$  = 21.1 Hz), 113.8, 58.6, 45.3.

**$^{19}\text{F NMR}$**  (377 MHz,  $\text{CDCl}_3$ )  $\delta$  -117.9.

**HRMS**(ESI,  $m/z$ ), calcd for  $\text{C}_{20}\text{H}_{18}\text{NClF}^+ [\text{M}+\text{H}]^+$ , 326.1106; found, 326.1105.

**HPLC analysis**: Chiracel OD-H, *n*-Hexane:*i*-PrOH = 97:3, 1.0 mL/min, UV = 254 nm. Retention time (min): 14.5 (minor) and 19.4 (major).

$[\alpha]_D^{20}$  = -67.72 ( $c$  = 1.0,  $\text{CHCl}_3$ , 86:14 er).

#### (*S*)-*N*-(1-(naphthalen-2-yl)-2-phenylethyl)aniline (**3am**)

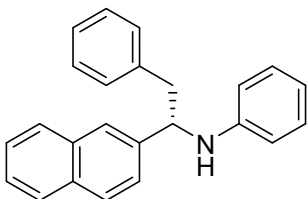

Following the general reaction procedure A, **3am** was obtained from the benzaldehyde hydrazone (**1a**, 34  $\mu\text{L}$ , 0.3 mmol, 1.5 equiv.) and 1-(naphthalen-2-yl)-*N*-phenylmethanimine (**2w**, 46.2 mg, 0.2 mmol, 1.0 equiv.), as a yellowish green solid (47.1 mg, 73%, 92:8 er), mp. 99-101  $^\circ\text{C}$ .

$R_f$  = 0.68 (Petroleum ether/Dichloromethane = 1:1).

**FT-IR** (neat,  $\text{cm}^{-1}$ ) 3408, 3051, 2918, 2851, 1601, 1506, 1316, 1265, 815, 747, 692, 478.

**$^1\text{H NMR}$**  (300 MHz,  $\text{CDCl}_3$ )  $\delta$  7.78 (dd,  $J$  = 14.7, 7.1 Hz, 4H), 7.54-7.36 (m, 3H), 7.32-7.18 (m, 3H), 7.18-7.08 (m, 2H), 7.02 (t,  $J$  = 7.9 Hz, 2H), 6.60 (t,  $J$  = 7.3 Hz, 1H), 6.48 (d,  $J$  = 7.7 Hz, 2H), 4.82-4.66 (m, 1H), 4.20 (s, 1H), 3.22 (dd,  $J$  = 14.0, 5.6 Hz, 1H), 3.07 (dd,  $J$  = 14.0, 8.3 Hz, 1H).

**$^{13}\text{C NMR}$**  (126 MHz,  $\text{CDCl}_3$ )  $\delta$  147.4, 141.2, 137.7, 133.7, 133.0, 129.4, 129.2, 128.7, 128.5, 128.0, 127.8, 126.9, 126.1, 125.7, 125.3, 124.9, 117.7, 113.9, 59.6, 45.3.

**HRMS**(ESI,  $m/z$ ), calcd for  $\text{C}_{24}\text{H}_{22}\text{N}^+ [\text{M}+\text{H}]^+$ , 324.1747; found, 324.1745.

**HPLC analysis**: Chiracel OD-H, *n*-Hexane:*i*-PrOH = 98:2, 1.0 mL/min, UV = 254 nm. Retention time (min): 12.2 (minor) and 16.2 (major).

$[\alpha]_D^{20}$  = -61.42 ( $c$  = 1.0,  $\text{CHCl}_3$ , 92:8 er).

#### (*S*)-*N*-(2-phenyl-1-(thiophen-2-yl)ethyl)aniline (**3an**)

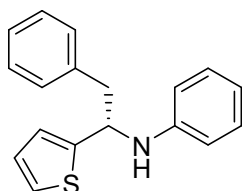

Following the general reaction procedure A, **3an** was obtained from the benzaldehyde hydrazone (**1a**, 34  $\mu$ L, 0.3 mmol, 1.5 equiv.) and *N*-phenyl-1-(thiophen-2-yl)methanimine (**2r**, 37.4 mg, 0.2 mmol, 1.0 equiv.), as a yellowish oil (42.7 mg, 77%, 91:9 er).

$R_f$  = 0.75 (Petroleum ether/Dichloromethane = 1:1).

**FT-IR** (neat,  $\text{cm}^{-1}$ ) 3403, 3026, 2921, 2851, 1601, 1506, 1312, 1265, 749, 692.

**$^1\text{H}$  NMR** (400 MHz,  $\text{CDCl}_3$ )  $\delta$  7.24 (dd,  $J$  = 16.6, 5.1 Hz, 4H), 7.11 (dd,  $J$  = 18.2, 7.7 Hz, 4H), 6.90 (dd,  $J$  = 4.7, 3.4 Hz, 1H), 6.85 (s, 1H), 6.68 (t,  $J$  = 6.8 Hz, 1H), 6.57 (d,  $J$  = 6.9 Hz, 2H), 4.90 (s, 1H), 4.10 (s, 1H), 3.19 (s, 1H), 3.18 (s, 1H).

**$^{13}\text{C}$  NMR** (101 MHz,  $\text{CDCl}_3$ )  $\delta$  148.6, 147.1, 137.5, 129.4, 129.3, 128.7, 127.0, 126.9, 123.94, 123.90, 118.2, 113.9, 55.6, 45.3.

**HRMS**(ESI,  $m/z$ ), calcd for  $\text{C}_{18}\text{H}_{18}\text{NS}^+ [\text{M}+\text{H}]^+$ , 280.1155; found, 280.1155.

**HPLC analysis**: Chiracel OD-H, *n*-Hexane:*i*-PrOH = 98:2, 1.0 mL/min, UV = 254 nm. Retention time (min): 10.8 (minor) and 12.2 (major).

$[\alpha]_D^{20}$  = -39.20 ( $c$  = 1.0,  $\text{CHCl}_3$ , 91:9 er).

#### (*S*)-*N*-(2-phenyl-1-(thiophen-3-yl)ethyl)aniline (**3ao**)

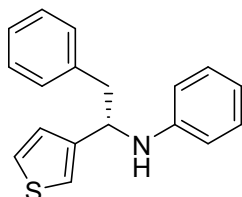

Following the general reaction procedure A, **3ao** was obtained from the benzaldehyde hydrazone (**1a**, 34  $\mu$ L, 0.3 mmol, 1.5 equiv.) and *N*-phenyl-1-(thiophen-3-yl)methanimine (**2s**, 37.4 mg, 0.2 mmol, 1.0 equiv.), as a colorless oil (39.1 mg, 70%, 89:11 er).

$R_f$  = 0.70 (Petroleum ether/Dichloromethane = 1:1).

**FT-IR** (neat,  $\text{cm}^{-1}$ ) 3406, 3051, 3025, 2922, 1601, 1503, 1316, 1264, 844, 827, 749, 692.

**$^1\text{H}$  NMR** (500 MHz,  $\text{CDCl}_3$ )  $\delta$  7.30-7.18 (m, 4H), 7.08 (d,  $J$  = 6.1 Hz, 4H), 7.06-6.97 (m, 2H), 6.65 (t,  $J$  = 7.2 Hz, 1H), 6.52 (d,  $J$  = 7.9 Hz, 2H), 4.73 (t,  $J$  = 6.5 Hz, 1H), 4.03 (s, 1H), 3.14 (dd,  $J$  = 14.8, 7.2 Hz, 1H), 3.12-3.05 (m, 1H).

**$^{13}\text{C}$  NMR** (126 MHz,  $\text{CDCl}_3$ )  $\delta$  147.4, 144.8, 137.7, 129.4, 129.2, 128.6, 126.8, 126.3, 126.1, 121.1, 117.8, 113.7, 55.4, 44.0.

**HRMS**(ESI,  $m/z$ ), calcd for  $\text{C}_{18}\text{H}_{18}\text{NS}^+ [\text{M}+\text{H}]^+$ , 280.1155; found, 280.1155.

**HPLC analysis**: Chiracel OD-H, *n*-Hexane:*i*-PrOH = 96:4, 1.0 mL/min, UV = 254 nm. Retention time (min): 8.8 (minor) and 10.7 (major).

$[\alpha]_D^{20}$  = -9.49 ( $c$  = 1.0,  $\text{CHCl}_3$ , 89:11 er).

#### (*S*)-*N*-(1-(furan-2-yl)-2-phenylethyl)aniline (**3ap**)

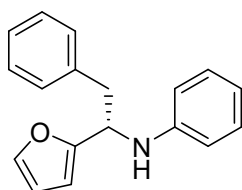

Following the general reaction procedure A, **3ap** was obtained from the benzaldehyde hydrazone (**1a**, 34  $\mu$ L, 0.3 mmol, 1.5 equiv.) and 1-(furan-2-yl)-*N*-phenylmethanimine (**2t**, 34.2 mg, 0.2 mmol, 1.0 equiv.), as a yellow oil (36.2 mg, 69%, 91:9 er).

$R_f$  = 0.65 (Petroleum ether/Dichloromethane = 1:1).

**FT-IR** (neat,  $\text{cm}^{-1}$ ) 3027, 1602, 1507, 1264, 1010, 749, 691.

**<sup>1</sup>H NMR** (500 MHz, CDCl<sub>3</sub>) δ 7.36 (s, 1H), 7.22 (dq, *J* = 14.4, 7.1 Hz, 3H), 7.12 (t, *J* = 7.9 Hz, 2H), 7.05 (d, *J* = 7.1 Hz, 2H), 6.69 (t, *J* = 7.3 Hz, 1H), 6.58 (d, *J* = 7.8 Hz, 2H), 6.30-6.18 (m, 1H), 6.03 (d, *J* = 2.4 Hz, 1H), 4.75 (t, *J* = 5.9 Hz, 1H), 3.95 (s, 1H), 3.24-3.19 (m, 1H), 3.17 (dd, *J* = 12.8, 5.6 Hz, 1H).

**<sup>13</sup>C NMR** (126 MHz, CDCl<sub>3</sub>) δ 155.3, 147.0, 141.6, 137.4, 129.4, 129.3, 128.5, 126.8, 118.1, 113.8, 110.4, 106.9, 53.2, 41.0.

**HRMS**(ESI, *m/z*), calcd for C<sub>18</sub>H<sub>18</sub>ON<sup>+</sup> [M+H]<sup>+</sup>, 264.1383; found, 264.1383.

**HPLC analysis:** Chiracel OD-H, *n*-Hexane:*i*-PrOH = 99:1, 1.0 mL/min, UV = 254 nm. Retention time (min): 8.8 (minor) and 9.9 (major).

[α]<sub>D</sub><sup>20</sup> = -33.03 (c = 1.0, CHCl<sub>3</sub>, 91:9 er).

### (*S*)-*N*-(1-(furan-3-yl)-2-phenylethyl)aniline (**3aq**)

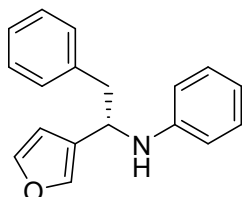

Following the general reaction procedure A, **3aq** was obtained from the benzaldehyde hydrazone (**1a**, 34 μL, 0.3 mmol, 1.5 equiv.) and 1-(furan-3-yl)-*N*-phenylmethanimine (**2u**, 34.2 mg, 0.2 mmol, 1.0 equiv.), as a yellow oil (32.6 mg, 62%, 91:9 er).

*R*<sub>f</sub> = 0.64 (Petroleum ether/Dichloromethane = 1:1).

**FT-IR** (neat, cm<sup>-1</sup>) 3419, 3027, 2923, 1602, 1506, 1312, 1267, 749, 692.

**<sup>1</sup>H NMR** (500 MHz, CDCl<sub>3</sub>) δ 7.34 (d, *J* = 1.1 Hz, 1H), 7.26 (t, *J* = 7.3 Hz, 2H), 7.23-7.16 (m, 2H), 7.12 (t, *J* = 8.1 Hz, 4H), 6.68 (t, *J* = 7.2 Hz, 1H), 6.57 (d, *J* = 8.0 Hz, 2H), 6.30 (s, 1H), 4.63 (t, *J* = 6.4 Hz, 1H), 3.88 (s, 1H), 3.10 (dd, *J* = 13.5, 6.6 Hz, 1H), 3.08-3.02 (m, 1H).

**<sup>13</sup>C NMR** (126 MHz, CDCl<sub>3</sub>) δ 147.3, 143.3, 139.8, 137.7, 129.5, 129.3, 128.6, 127.6, 126.8, 117.8, 113.8, 109.2, 51.4, 43.1.

**HRMS**(ESI, *m/z*), calcd for C<sub>18</sub>H<sub>18</sub>ON<sup>+</sup> [M+H]<sup>+</sup>, 264.1383; found, 264.1383.

**HPLC analysis:** Chiracel OD-H, *n*-Hexane:*i*-PrOH = 96:4, 1.0 mL/min, UV = 254 nm. Retention time (min): 8.6 (minor) and 10.0 (major).

[α]<sub>D</sub><sup>20</sup> = -12.57 (c = 1.0, CHCl<sub>3</sub>, 91:9 er).

### (*S*)-*N*-(1-([1,1'-biphenyl]-4-yl)-2-phenylethyl)aniline (**3ar**)

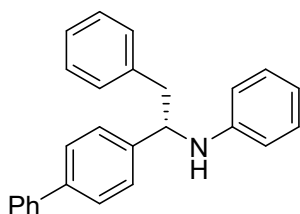

Following the general reaction procedure A, **3ar** was obtained from the benzaldehyde hydrazone (**1a**, 34 μL, 0.3 mmol, 1.5 equiv.) and 1-([1,1'-biphenyl]-4-yl)-*N*-phenylmethanimine (**2x**, 51.4 mg, 0.2 mmol, 1.0 equiv.), as a white solid (39.1 mg, 56%, 93:7 er), mp. 173-174 °C.

*R*<sub>f</sub> = 0.75 (Petroleum ether/Dichloromethane = 1:1).

**FT-IR** (neat, cm<sup>-1</sup>) 3415, 3053, 3026, 2922, 1600, 1506, 1318, 1274, 764, 749, 694.

**<sup>1</sup>H NMR** (400 MHz, CDCl<sub>3</sub>) δ 7.58 (d, *J* = 7.7 Hz, 2H), 7.54 (d, *J* = 8.2 Hz, 2H), 7.41 (dd, *J* = 16.5, 7.9 Hz, 4H), 7.35-7.25 (m, 3H), 7.25-7.19 (m, 1H), 7.15 (d, *J* = 7.0 Hz, 2H), 7.06 (t, *J* = 7.9 Hz, 2H), 6.63 (t, *J* = 7.3 Hz, 1H), 6.48 (d, *J* = 7.8 Hz, 2H), 4.63 (dd, *J* = 7.9, 5.9 Hz, 1H), 4.14 (s, 1H), 3.17 (dd, *J* = 14.0, 5.6 Hz, 1H), 3.04 (dd, *J* = 14.0, 8.3 Hz, 1H).

**<sup>13</sup>C NMR** (101 MHz, CDCl<sub>3</sub>) δ 147.4, 142.7, 141.0, 140.0, 137.8, 129.4, 129.2, 128.9, 128.7, 127.4, 127.3, 127.2, 127.0, 126.9, 117.7, 113.8, 59.1, 45.3.

**HRMS**(ESI, *m/z*), calcd for C<sub>26</sub>H<sub>24</sub>N<sup>+</sup> [M+H]<sup>+</sup>, 350.1903; found, 350.1901.

**HPLC analysis:** Chiracel OD-H, *n*-Hexane:*i*-PrOH = 97:3, 1.0 mL/min, UV = 254 nm. Retention time (min): 11.0 (minor) and 13.7 (major).

$[\alpha]_D^{20} = -36.88$  ( $c = 1.0$ , CHCl<sub>3</sub>, 93:7 er).

**(S)-11-benzyl-10,11-dihydrodibenzo[*b,f*][1,4]oxazepine (3as)**

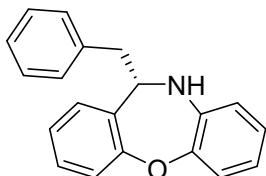

Following the general reaction procedure A, **3as** was obtained from the benzaldehyde hydrazone (**1a**, 34  $\mu$ L, 0.3 mmol, 1.5 equiv.) and dibenzo[*b,f*][1,4]oxazepine (**2aa**, 39.0 mg, 0.2 mmol, 1.0 equiv.), as a white solid (18.9 mg, 33%, 83:17 er), mp. 176-177 °C.

$R_f = 0.56$  (Petroleum ether/Dichloromethane = 1:1).

**FT-IR** (neat, cm<sup>-1</sup>) 2919, 1506, 1490, 1266, 745.

**<sup>1</sup>H NMR** (400 MHz, CDCl<sub>3</sub>)  $\delta$  7.35-7.27 (m, 2H), 7.27-7.22 (m, 2H), 7.22-7.15 (m, 3H), 7.15-7.09 (m, 2H), 7.05 (td,  $J = 7.4, 1.2$  Hz, 1H), 6.88-6.79 (m, 1H), 6.73-6.64 (m, 1H), 6.45 (dd,  $J = 7.9, 1.4$  Hz, 1H), 4.56 (dd,  $J = 9.9, 4.9$  Hz, 1H), 3.95 (s, 1H), 3.42 (dd,  $J = 13.5, 10.0$  Hz, 1H), 3.30 (dd,  $J = 13.5, 5.0$  Hz, 1H).

**<sup>13</sup>C NMR** (101 MHz, CDCl<sub>3</sub>)  $\delta$  157.3, 144.1, 138.9, 137.5, 133.7, 129.5, 129.2, 128.8, 127.6, 126.7, 124.6, 124.4, 121.9, 121.3, 119.2, 118.9, 59.5, 41.7.

**HRMS**(ESI,  $m/z$ ), calcd for C<sub>20</sub>H<sub>18</sub>ON<sup>+</sup> [M+H]<sup>+</sup>, 288.1383; found, 288.1380.

**HPLC analysis:** Chiracel OD-H, *n*-Hexane:*i*-PrOH = 97:3, 1.0 mL/min, UV = 254 nm. Retention time (min): 9.2 (minor) and 10.5 (major).

$[\alpha]_D^{20} = -117.33$  ( $c = 1.0$ , CHCl<sub>3</sub>, 83:17 er).<sup>7</sup>

**(S,E)-N-(1,4-diphenylbut-3-en-2-yl)aniline (3at)**

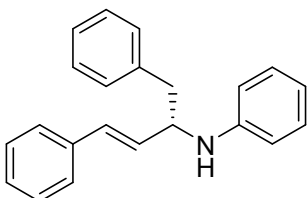

Following the general reaction procedure A, **3at** was obtained from the benzaldehyde hydrazone (**1a**, 34  $\mu$ L, 0.3 mmol, 1.5 equiv.) and *N*,3-diphenylprop-2-en-1-imine (**2y**, 41.4 mg, 0.2 mmol, 1.0 equiv.), as a yellow oil (18.5 mg, 31%, 78:22 er).

$R_f = 0.58$  (Petroleum ether/Dichloromethane = 1:1).

**FT-IR** (neat, cm<sup>-1</sup>) 3566, 1601, 1502, 1265, 745, 692.

**<sup>1</sup>H NMR** (400 MHz, CDCl<sub>3</sub>)  $\delta$  7.30 (dd,  $J = 12.3, 5.0$  Hz, 6H), 7.24-7.18 (m, 4H), 7.14 (t,  $J = 7.9$  Hz, 2H), 6.68 (t,  $J = 7.3$  Hz, 1H), 6.63 (d,  $J = 7.8$  Hz, 2H), 6.54 (d,  $J = 16.0$  Hz, 1H), 6.19 (dd,  $J = 15.9, 6.0$  Hz, 1H), 4.28 (q,  $J = 6.2$  Hz, 1H), 3.80 (s, 1H), 3.03 (dd,  $J = 11.7, 4.4$  Hz, 1H), 2.98 (dd,  $J = 11.7, 4.8$  Hz, 1H).

**<sup>13</sup>C NMR** (101 MHz, CDCl<sub>3</sub>)  $\delta$  147.5, 137.7, 137.1, 131.5, 130.6, 129.6, 129.3, 128.67, 128.65, 127.5, 126.8, 126.5, 117.7, 113.8, 56.6, 42.5.

**HRMS**(ESI,  $m/z$ ), calcd for C<sub>22</sub>H<sub>22</sub>N<sup>+</sup> [M+H]<sup>+</sup>, 300.1747; found, 300.1745.

**HPLC analysis:** Chiracel OD-H, *n*-Hexane:*i*-PrOH = 97:3, 1.0 mL/min, UV = 254 nm. Retention time (min): 11.7 (minor) and 14.5 (major).

$[\alpha]_D^{20} = -10.48$  ( $c = 1.0$ , CHCl<sub>3</sub>, 78:22 er).

**(S)-N-(1,2-diphenylethyl)-4-methoxyaniline (3au)**

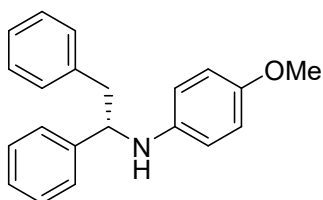

Following the general reaction procedure A, **3au** was obtained from the benzaldehyde hydrazone (**1a**, 34  $\mu$ L, 0.3 mmol, 1.5 equiv.) and *N*-(4-methoxyphenyl)-1-phenylmethanimine (**2z**, 42.2 mg, 0.2 mmol, 1.0 equiv.), as a yellow oil (9.7 mg, 16%, 87:13 er).

$R_f$  = 0.45 (Petroleum ether/Ethyl acetate = 5:1).

**FT-IR** (neat,  $\text{cm}^{-1}$ ) 2918, 2322, 1714, 1507, 1260, 750.

**$^1\text{H NMR}$**  (500 MHz,  $\text{CDCl}_3$ )  $\delta$  7.35-7.16 (m, 8H), 7.12 (d,  $J$  = 7.1 Hz, 2H), 6.63 (d,  $J$  = 8.9 Hz, 2H), 6.40 (d,  $J$  = 8.9 Hz, 2H), 4.50 (dd,  $J$  = 7.9, 5.9 Hz, 1H), 3.87 (s, 1H), 3.65 (s, 3H), 3.11 (dd,  $J$  = 13.9, 5.5 Hz, 1H), 2.98 (dd,  $J$  = 13.9, 8.3 Hz, 1H).

**$^{13}\text{C NMR}$**  (126 MHz,  $\text{CDCl}_3$ )  $\delta$  152.2, 143.8, 141.7, 138.0, 129.3, 128.67, 128.65, 127.1, 126.8, 126.6, 115.0, 114.8, 60.2, 55.8, 45.4.

**HRMS**(ESI,  $m/z$ ), calcd for  $\text{C}_{21}\text{H}_{22}\text{ON}^+$  [ $\text{M}+\text{H}$ ] $^+$ , 304.1696; found, 304.1691.

**HPLC analysis:** Chiracel OD-H, *n*-Hexane:*i*-PrOH = 90:10, 1.0 mL/min, UV = 254 nm. Retention time (min): 7.1 (major) and 9.4 (minor).

$[\alpha]_D^{20}$  = -69.64 ( $c$  = 1.0,  $\text{CHCl}_3$ , 87:13 er).

#### (*S*)-4-chloro-*N*-(1,2-diphenylethyl)aniline (**3av**)

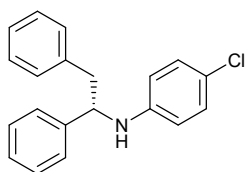

Following the general reaction procedure A, **3av** was obtained from the benzaldehyde hydrazone (**1a**, 34  $\mu$ L, 0.3 mmol, 1.5 equiv.) and *N*-(4-methoxyphenyl)-1-phenylmethanimine (**2z**, 43.0 mg, 0.2 mmol, 1.0 equiv.), as a yellow oil (25.8 mg, 42%, 88:12 er).

$R_f$  = 0.76 (Petroleum ether/Dichloromethane = 1:1).

**FT-IR** (neat,  $\text{cm}^{-1}$ ) 3410, 3026, 2918, 1601, 1512, 1265, 750, 699.

**$^1\text{H NMR}$**  (500 MHz,  $\text{CDCl}_3$ )  $\delta$  7.26 (dt,  $J$  = 8.8, 6.2 Hz, 8H), 7.16-7.04 (m, 2H), 7.04-6.89 (m, 2H), 6.43-6.25 (m, 2H), 4.54 (dd,  $J$  = 7.8, 5.9 Hz, 1H), 4.12 (s, 1H), 3.13 (dd,  $J$  = 14.0, 5.7 Hz, 1H), 2.99 (dd,  $J$  = 14.0, 8.2 Hz, 1H).

**$^{13}\text{C NMR}$**  (126 MHz,  $\text{CDCl}_3$ )  $\delta$  145.88, 142.99, 137.57, 129.31, 128.98, 128.79, 128.73, 127.38, 126.96, 126.55, 122.35, 114.92, 59.49, 45.17.

**HRMS**(ESI,  $m/z$ ), calcd for  $\text{C}_{20}\text{H}_{19}\text{NCl}^+$  [ $\text{M}+\text{H}$ ] $^+$ , 308.1201; found, 308.1199.

**HPLC analysis:** Chiracel OD-H, *n*-Hexane:*i*-PrOH = 98:2, 1.0 mL/min, UV = 254 nm. Retention time (min): 10.2 (major) and 12.8 (minor).

$[\alpha]_D^{20}$  = -59.04 ( $c$  = 1.0,  $\text{CHCl}_3$ , 88:12 er).

#### (*S*)-1,2-diphenylethan-1-amine (**4**)

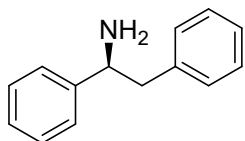

Following the general reaction procedure of Removal of protective groups in **3au**, **4** was obtained from the (*S*)-*N*-(1,2-diphenylethyl)-4-methoxyaniline (**3au**, 30.3 mg, 0.1 mmol, 1.0 equiv.), as a yellow oil (14.5 mg, 74%, 85:15 er).

$R_f$  = 0.17 (Petroleum ether/Ethyl acetate = 1:1).

**FT-IR** (neat,  $\text{cm}^{-1}$ ) 2367, 2328, 1942, 1265, 744, 699.

**<sup>1</sup>H NMR** (500 MHz, CDCl<sub>3</sub>) δ 7.34 (q, *J* = 7.6 Hz, 4H), 7.26 (dt, *J* = 19.4, 7.5 Hz, 4H), 7.17 (d, *J* = 7.3 Hz, 2H), 4.19 (dd, *J* = 8.4, 5.1 Hz, 1H), 3.01 (dd, *J* = 13.3, 4.7 Hz, 1H), 2.84 (dd, *J* = 13.1, 9.0 Hz, 1H).

**<sup>13</sup>C NMR** (126 MHz, CDCl<sub>3</sub>) δ 145.6, 139.2, 129.5, 128.6, 127.3, 126.59, 126.53, 57.7, 46.6.

**HRMS**(ESI, *m/z*), calcd for C<sub>14</sub>H<sub>16</sub>N<sup>+</sup> [M+H]<sup>+</sup>, 198.1277; found, 198.1276.

**HPLC analysis:** Chiracel OD-H, *n*-Hexane:*i*-PrOH:Diethylamine = 89.9:10:0.1, 1.0 mL/min, UV = 220 nm. Retention time (min): 8.3 (major) and 11.9 (minor).

[α]<sub>D</sub><sup>20</sup> = +7.06 (c = 1.0, CHCl<sub>3</sub>, 85:15 er).

**(S)-N-(1,2-diphenylethyl-2-*d*)aniline (*d*-3a)**

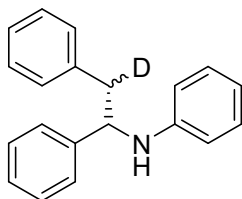

Following the general reaction procedure of deuterium labeling study, ***d*-3a** was obtained from the benzaldehyde hydrazone (**1a**, 34 μL, 0.3 mmol, 1.5 equiv.) and *N*-benzylideneaniline (**2a**, 36.2 mg, 0.2 mmol, 1.0 equiv.), as a colorless solid (42.5 mg, 78%, 89:11 er), mp. 58-60 °C.

R<sub>f</sub> = 0.71 (Petroleum ether/Dichloromethane = 1:1).

**FT-IR** (neat, cm<sup>-1</sup>) 3420, 3052, 3027, 1602, 1506, 1317, 1265, 749, 699.

**<sup>1</sup>H NMR** (300 MHz, CDCl<sub>3</sub>) δ 7.31 (dd, *J* = 7.0, 4.7 Hz, 4H), 7.28-7.18 (m, 4H), 7.15-7.08 (m, 2H), 7.08-6.98 (m, 2H), 6.62 (t, *J* = 7.3 Hz, 1H), 6.52-6.40 (m, 2H), 4.57 (d, *J* = 7.9 Hz, 1H), 4.17 (s, 1H), 3.11 (d, *J* = 5.7 Hz, 0.38H), 3.00 (d, *J* = 8.2 Hz, 0.62H).

**<sup>13</sup>C NMR** (126 MHz, CDCl<sub>3</sub>) δ 147.4, 143.5, 143.3, 140.4, 129.2, 128.7, 127.3, 126.6, 120.9, 117.7, 113.7, 111.3, 58.0, 34.3.

**HRMS**(ESI, *m/z*), calcd for C<sub>20</sub>H<sub>19</sub>DN<sup>+</sup> [M+H]<sup>+</sup>, 275.1653; found, 275.1649.

**HPLC analysis:** Chiracel OD-H, *n*-Hexane:*i*-PrOH = 98:2, 1.0 mL/min, UV = 254 nm. Retention time (min): 8.3 (minor) and 10.5 (major).

[α]<sub>D</sub><sup>20</sup> = -32.86 (c = 1.0, CHCl<sub>3</sub>, 89:11 er).

## V. Assignment of Absolute Configuration

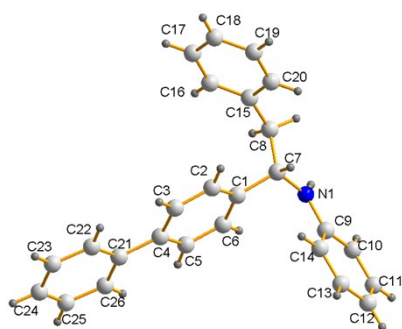

Crystal data and structure refinement for **3ar** (CCDC: 2122656)

### Identification code **3ar**

Empirical formula C<sub>26</sub> H<sub>23</sub> N

Formula weight 349.450

Temperature 169.99 K

Wavelength 1.54184 Å

Crystal system Orthorhombic

Space group P 21 21 21

Unit cell dimensions a = 5.7298(1) Å  $\alpha = 90.000^\circ$  .

b = 17.2063(3) Å  $\beta = 90.000^\circ$  .

c = 19.1047(4) Å  $\gamma = 90.000^\circ$  .

Volume 1883.51(6) Å<sup>3</sup>

Z 4

Density (calculated) 1.233 Mg/m<sup>3</sup>

Absorption coefficient 0.000 mm<sup>-1</sup>

F(000) 744.00

Crystal size 0.300 x 0.200 x 0.100 mm<sup>3</sup>

Theta range for data collection 2.3127 to 75.2141° .

Index ranges -6 ≤ h ≤ 5, -21 ≤ k ≤ 21, -23 ≤ l ≤ 23

Reflections collected 10768

Independent reflections 3711 [R(int) = 0.0420]

Completeness to theta = 66.97° 100.00 %

Absorption correction spherical harmonics

Max. and min. transmission 1.00000 and 0.54811

Refinement method Full-matrix least-squares on F<sup>2</sup>

Data / restraints / parameters 3711 / 0 / 244

Goodness-of-fit on F<sup>2</sup> 0.535(999)

Final R indices [I > 4σ(I)] R1 = 0.0419, wR2 = 0.1073

R indices (all data) R1 = 0.0474, wR2 = 0.1066

Absolute structure parameter 0.00

Extinction coefficient n/a

Largest diff. peak and hole 0.14 and -0.18 e.Å<sup>-3</sup>

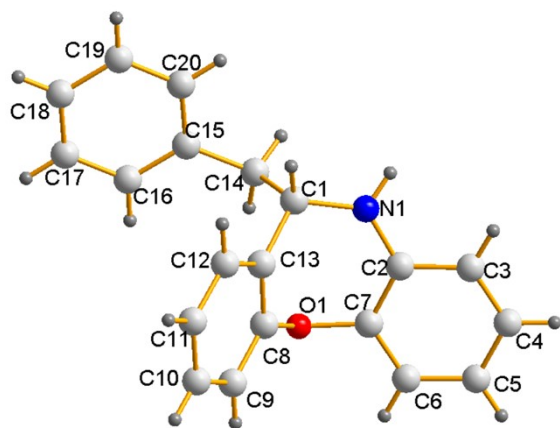

Crystal data and structure refinement for **3as** (CCDC: 2122657)

Identification code **3as**

Empirical formula C<sub>20</sub> H<sub>17</sub> N O

Formula weight 287.350

Temperature 169.97(13) K

Wavelength 1.54184 Å

Crystal system Monoclinic

Space group P 1 2<sub>1</sub>/c 1

Unit cell dimensions a = 14.4749(4) Å α = 90.000° .

b = 5.5880(1) Å β = 103.172(3)° .

c = 18.3790(5) Å γ = 90.000° .

Volume 1447.5(1) Å<sup>3</sup>

Z 4

Density (calculated) 1.319 Mg/m<sup>3</sup>

Absorption coefficient 0.000 mm<sup>-1</sup>

F(000) 608.0

Crystal size 0.300 x 0.100 x 0.050 mm<sup>3</sup>

Theta range for data collection 2.4690 to 75.3063° .

Index ranges -17 ≤ h ≤ 17, -6 ≤ k ≤ 6, -22 ≤ l ≤ 22

Reflections collected 17557

Independent reflections 2904 [R(int) = 0.0381]

Completeness to theta = 66.97° 99.93 %

Absorption correction spherical harmonics

Max. and min. transmission 1.00000 and 0.68492

Refinement method Full-matrix least-squares on F<sup>2</sup>

Data / restraints / parameters 2904 / 0 / 199

Goodness-of-fit on F<sup>2</sup> 0.535(999)

Final R indices [I > 4σ(I)] R1 = 0.0471, wR2 = 0.1239

R indices (all data) R1 = 0.0550, wR2 = 0.1239

Absolute structure parameter 0.02

Extinction coefficient n/a

Largest diff. peak and hole 0.42 and -0.23 e.Å<sup>-3</sup>



## VI. NMR Spectra

**(S)-N-(1,2-diphenylethyl)aniline (3aa)**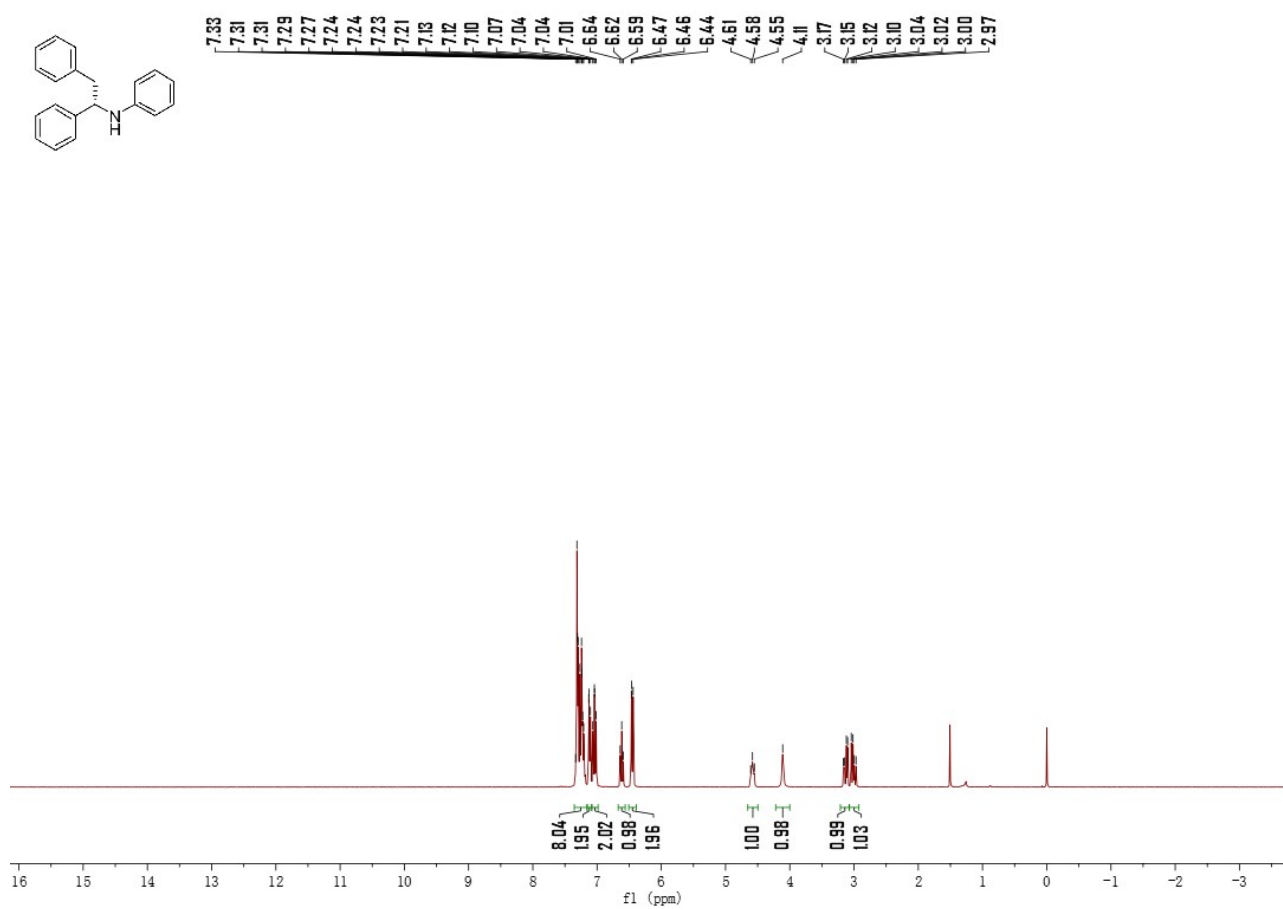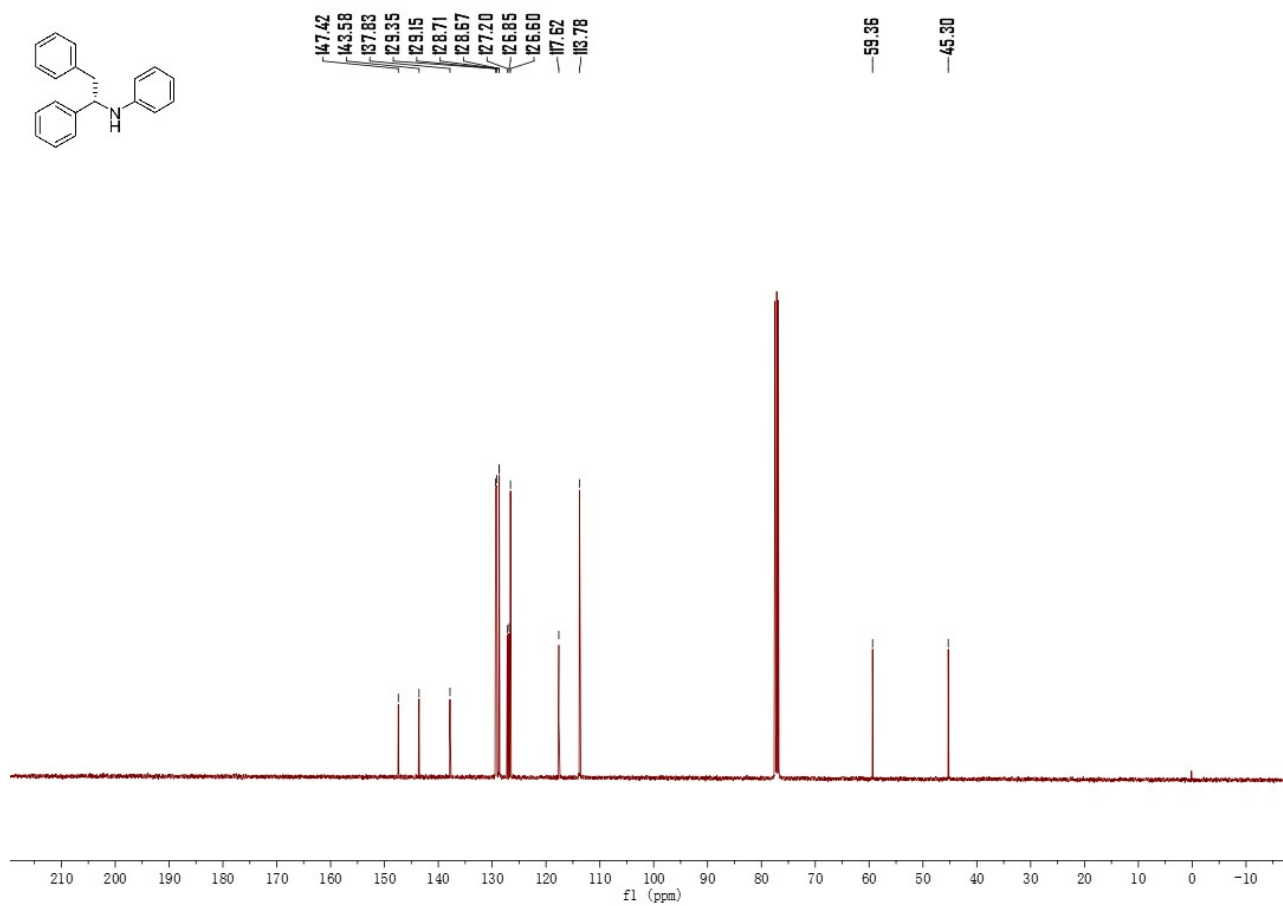

**(S)-N-(2-(3-methoxyphenyl)-1-phenylethyl)aniline (3ba)**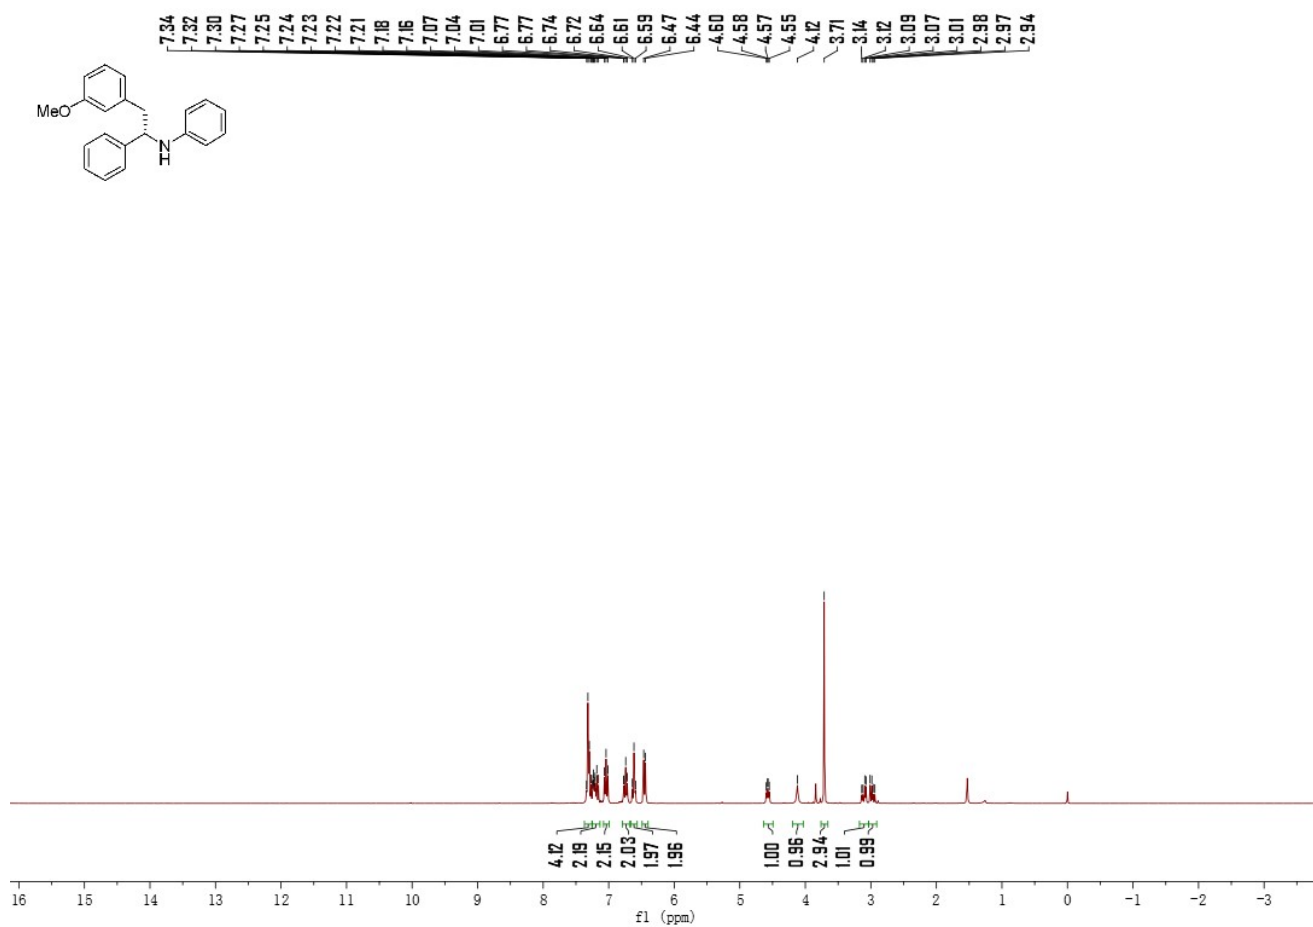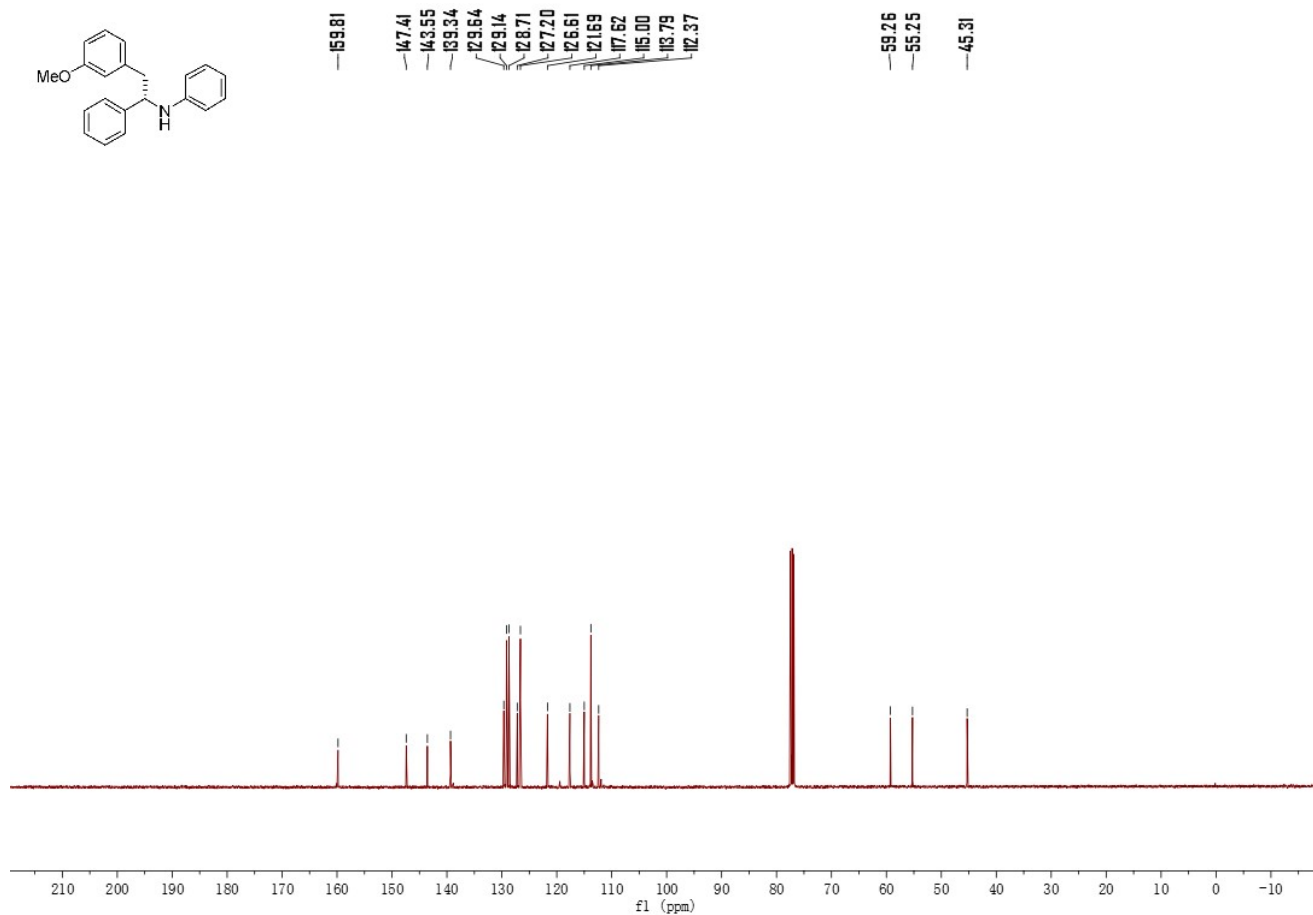

**(S)-N-(2-(4-methoxyphenyl)-1-phenylethyl)aniline (3ca)**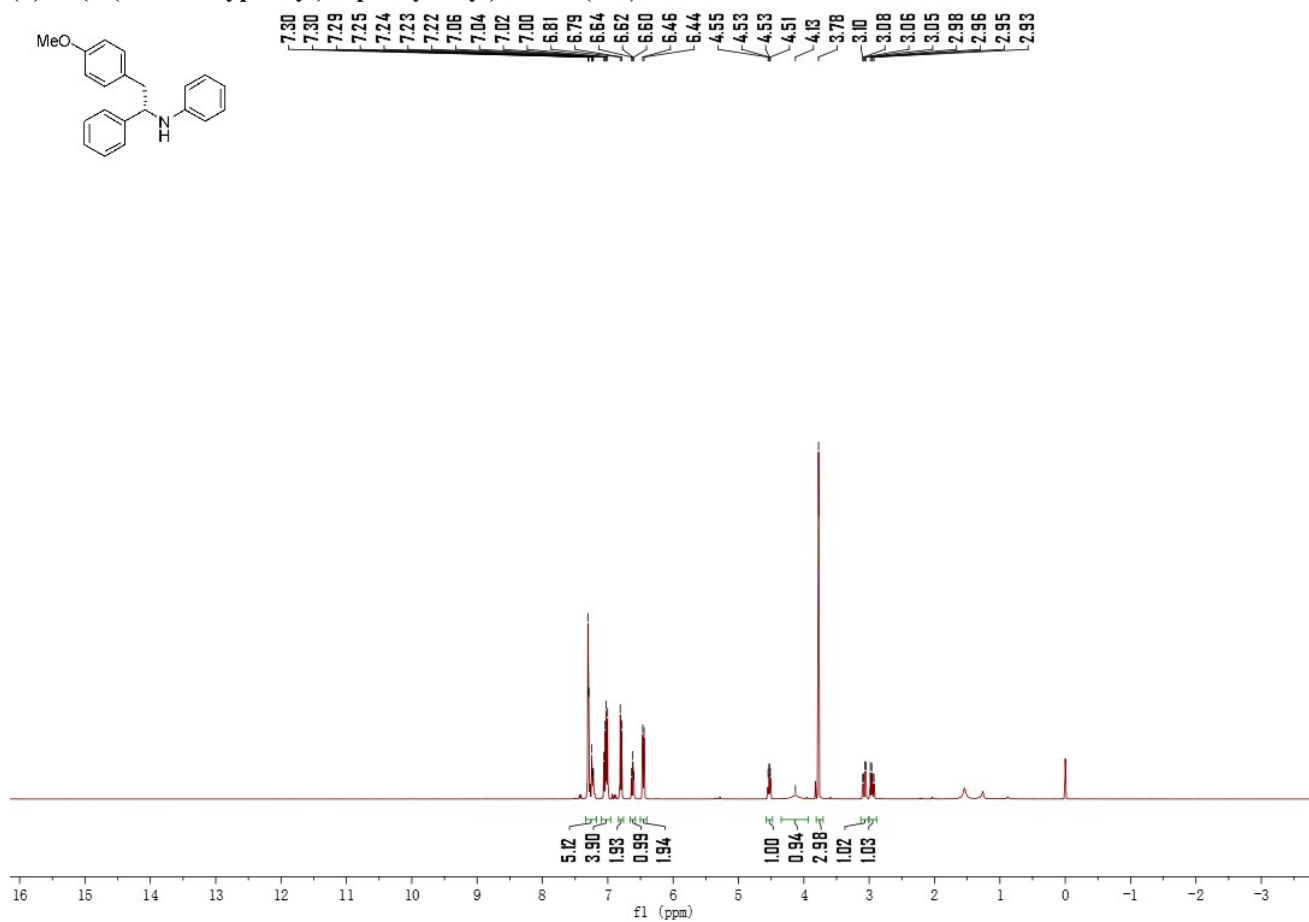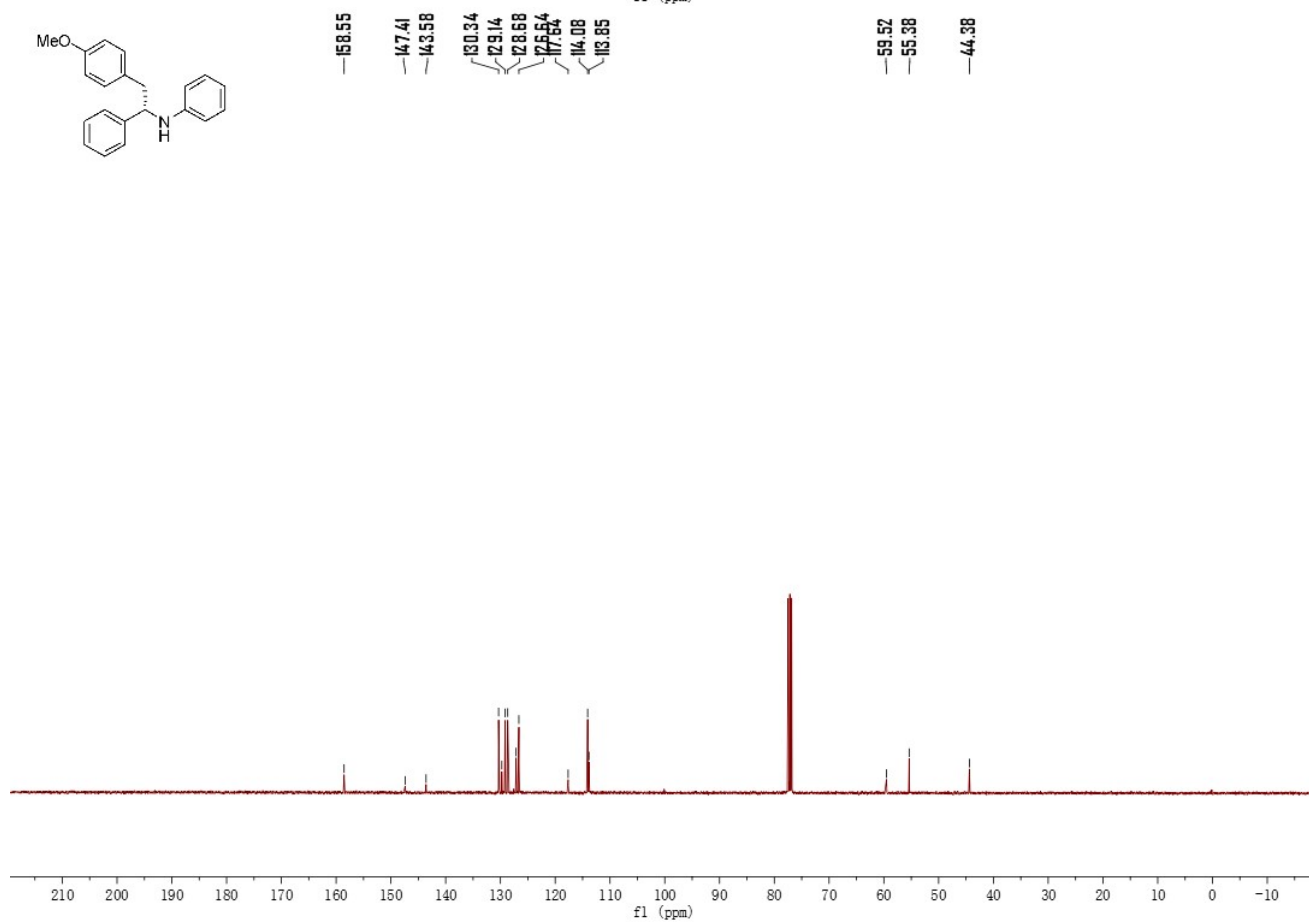

**(S)-N-(2-(2,3-dimethoxyphenyl)-1-phenylethyl)aniline (3da)**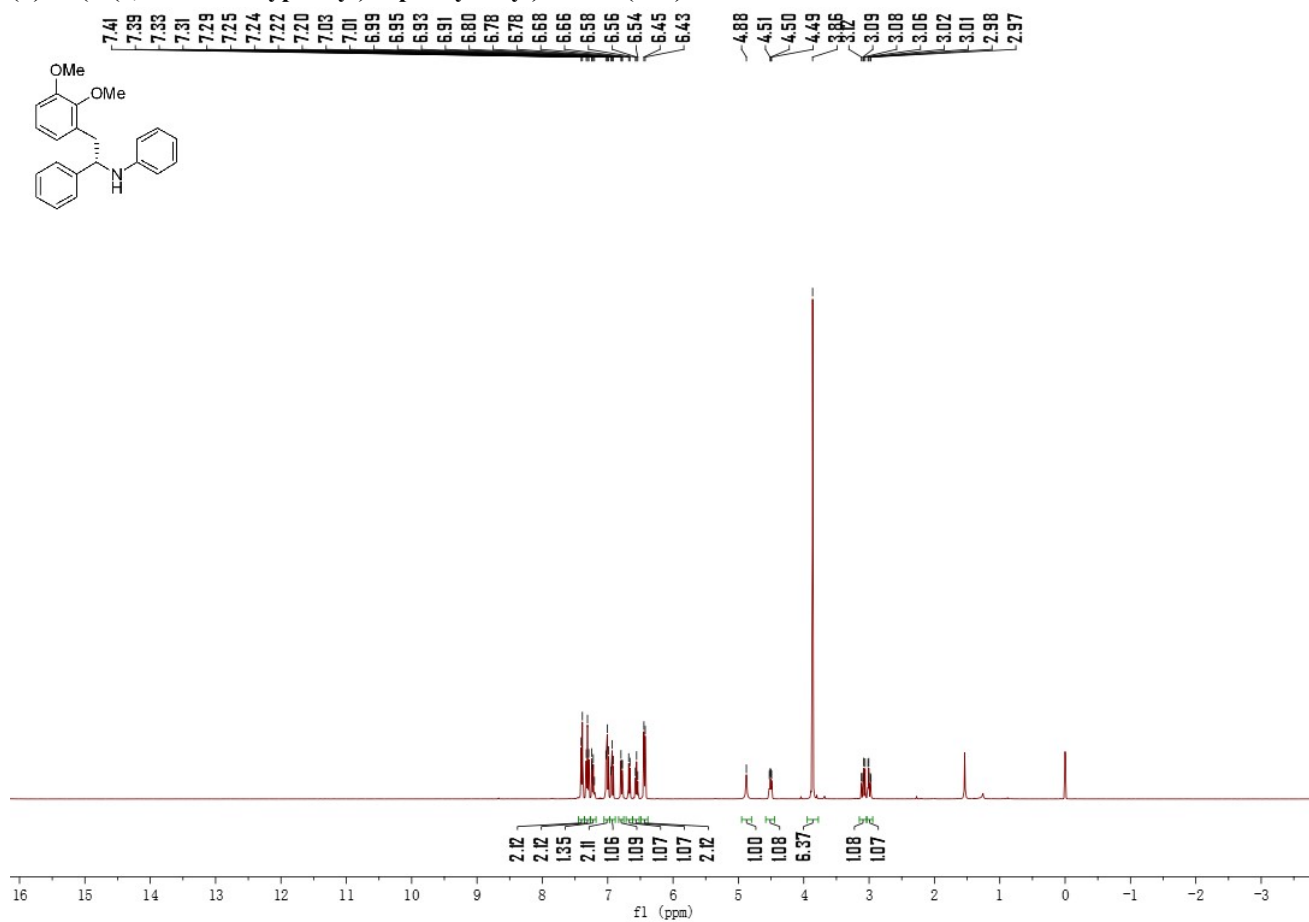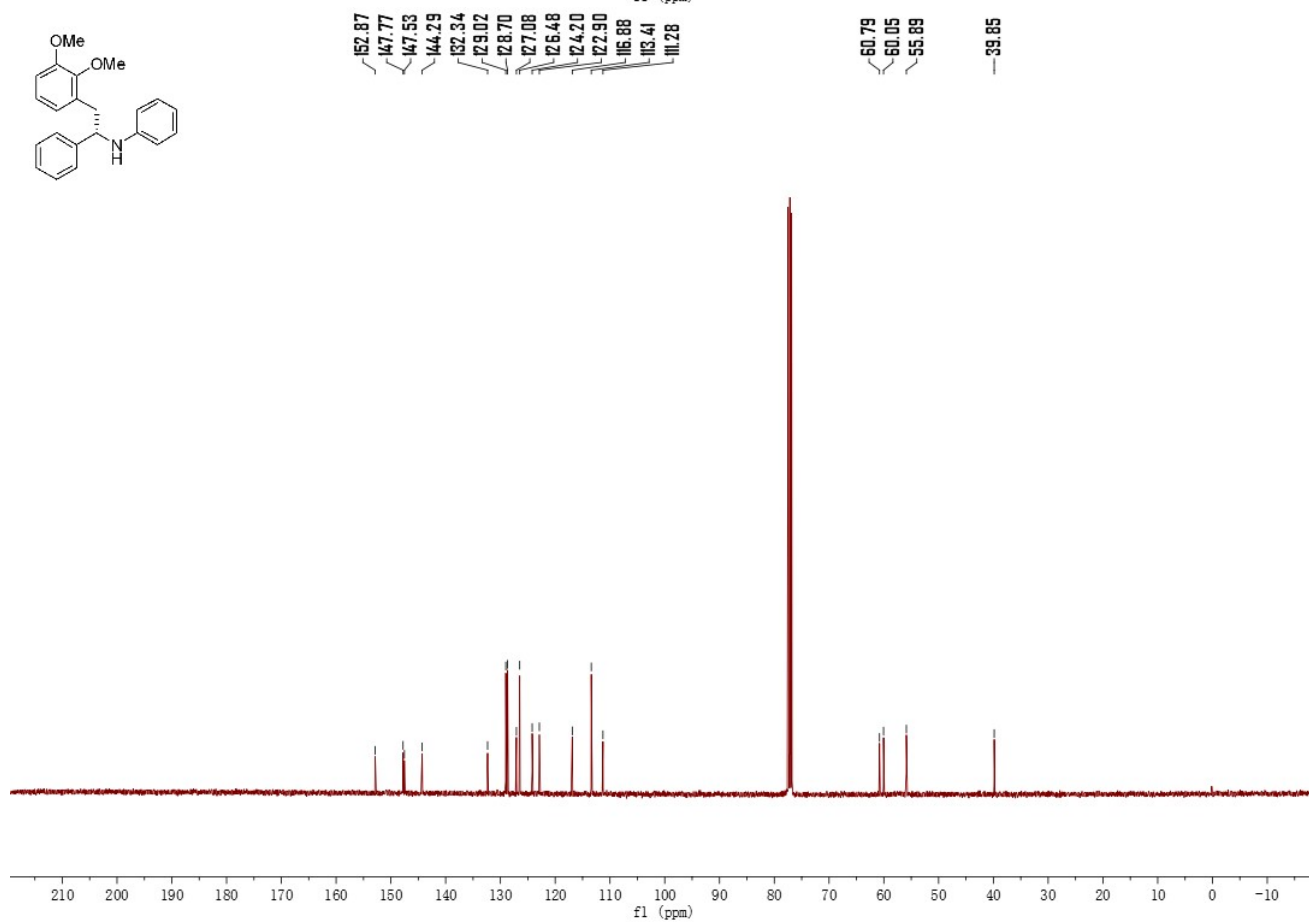

**(S)-N-(2-(3,4-dimethoxyphenyl)-1-phenylethyl)aniline (3ea)**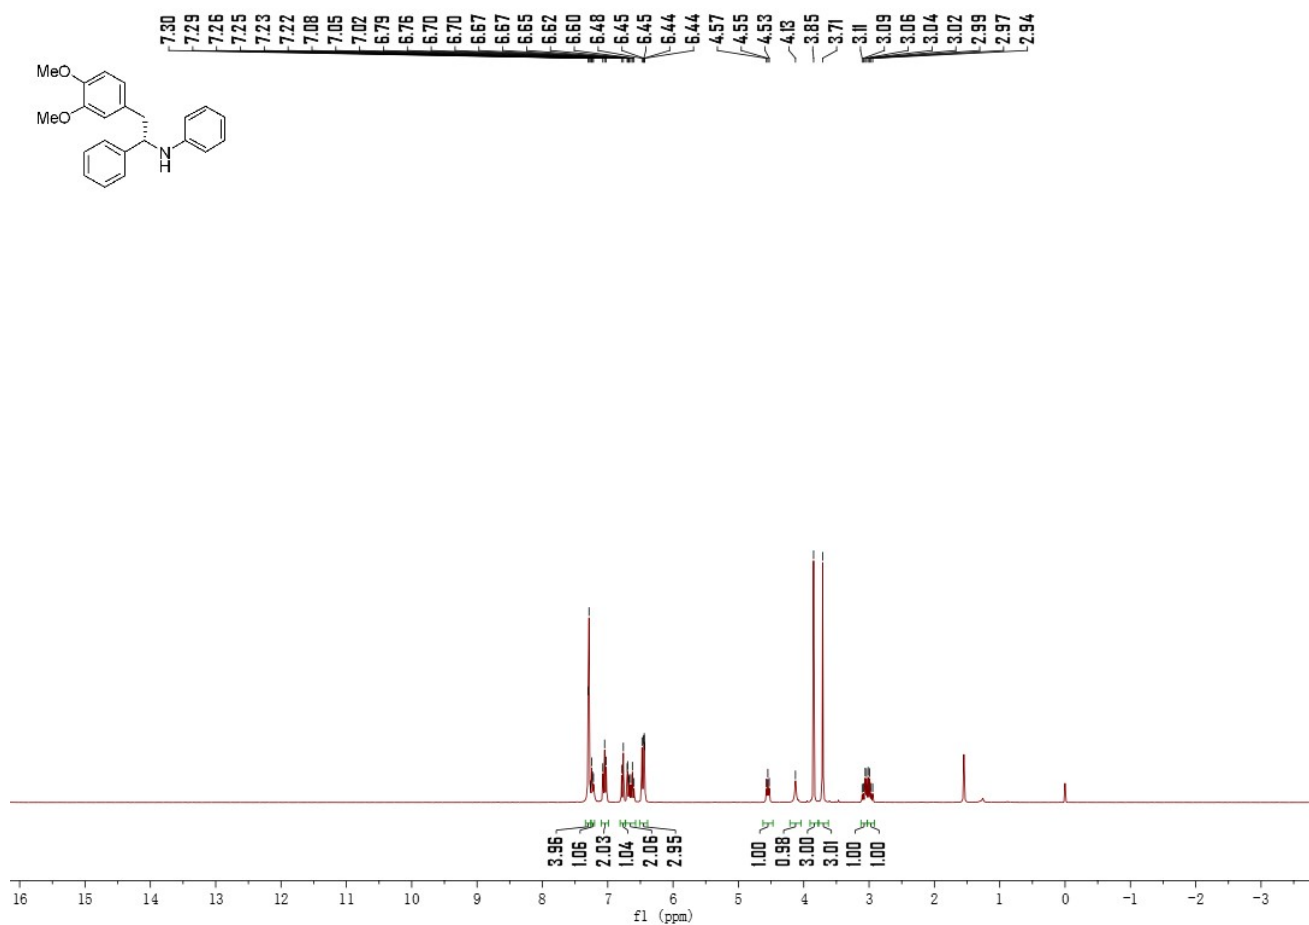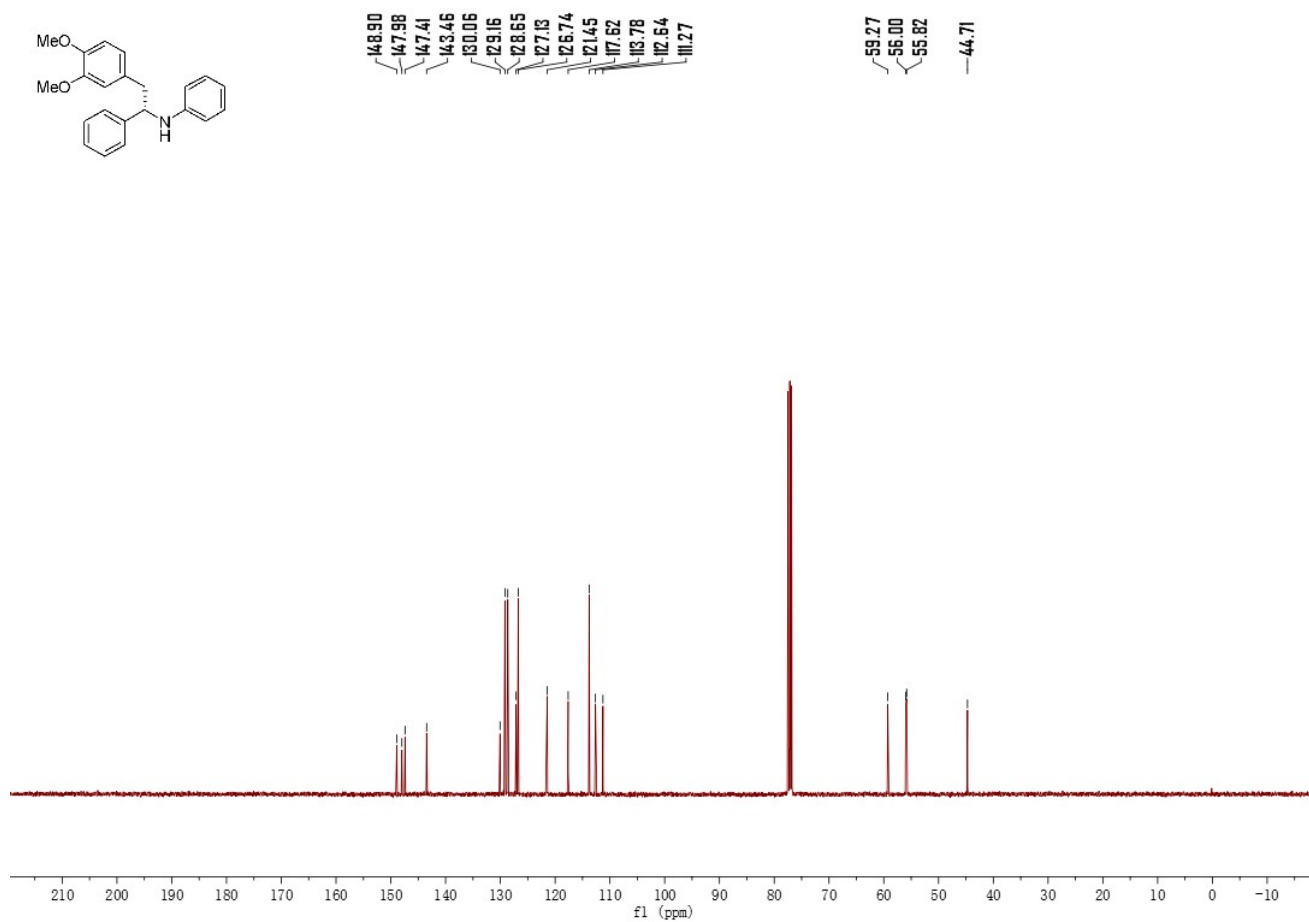

**(S)-N-(2-(3,5-dimethoxyphenyl)-1-phenylethyl)aniline (3fa)**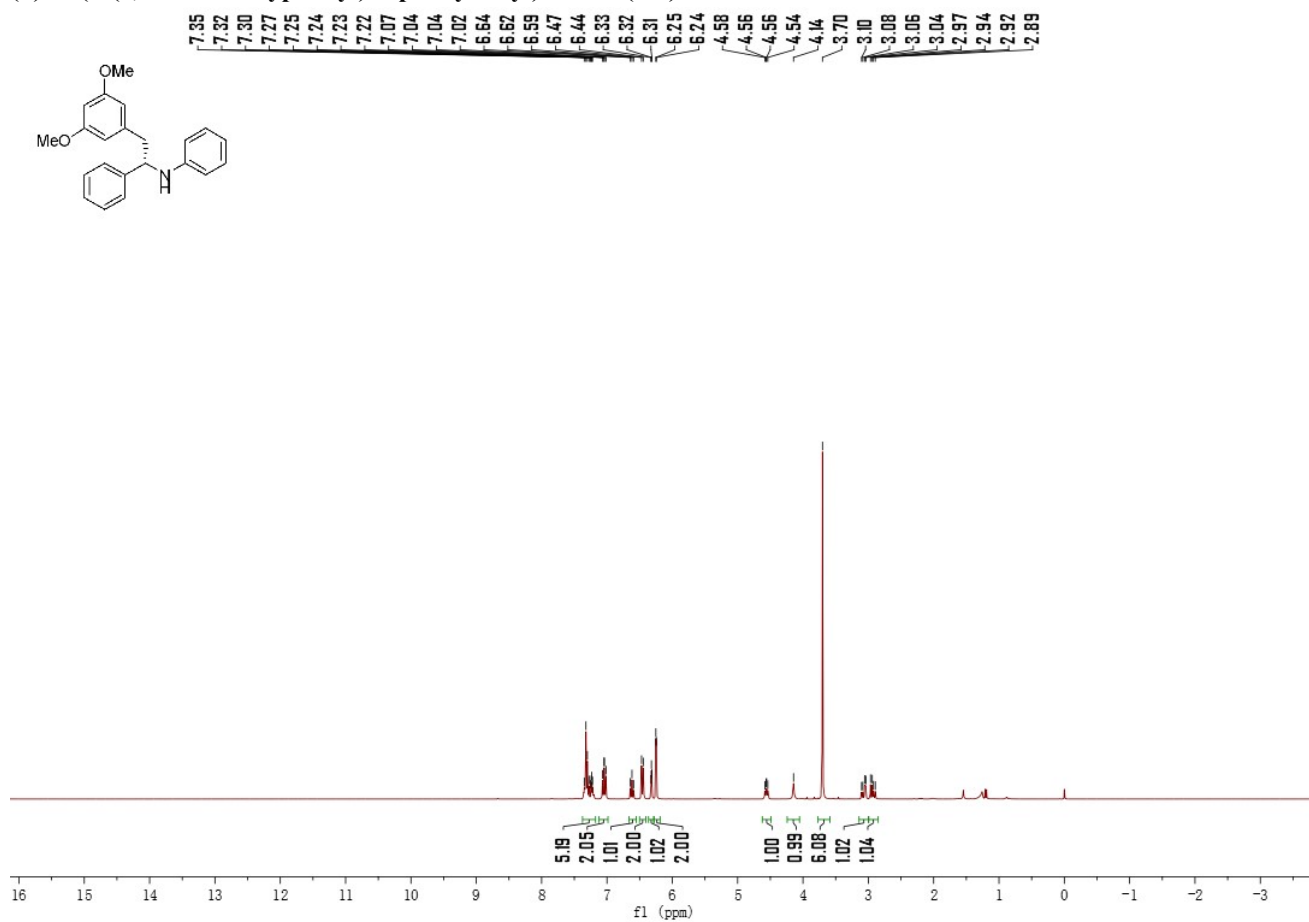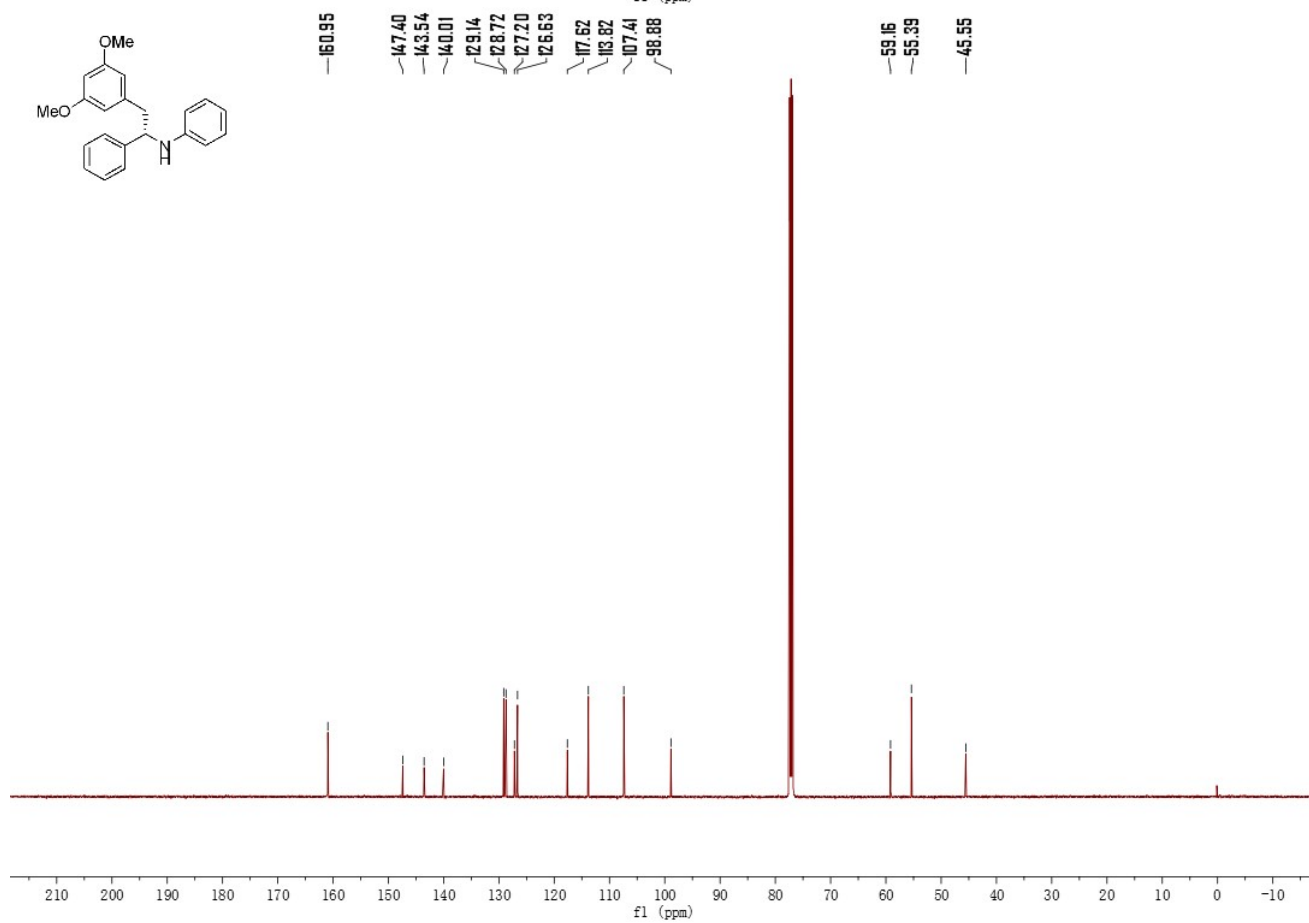

**(S)-N-(1-phenyl-2-(3,4,5-trimethoxyphenyl)ethyl)aniline (3ga)**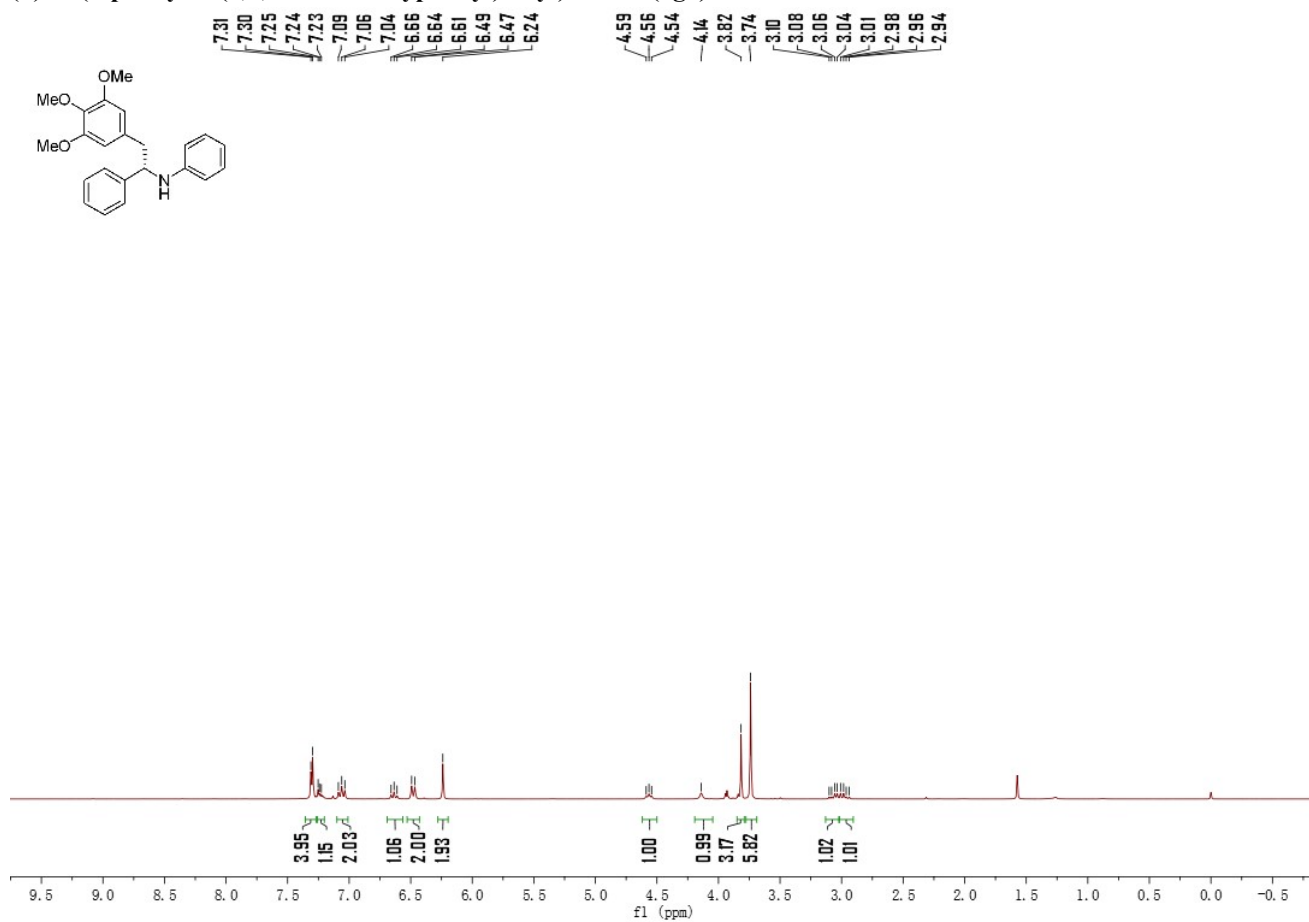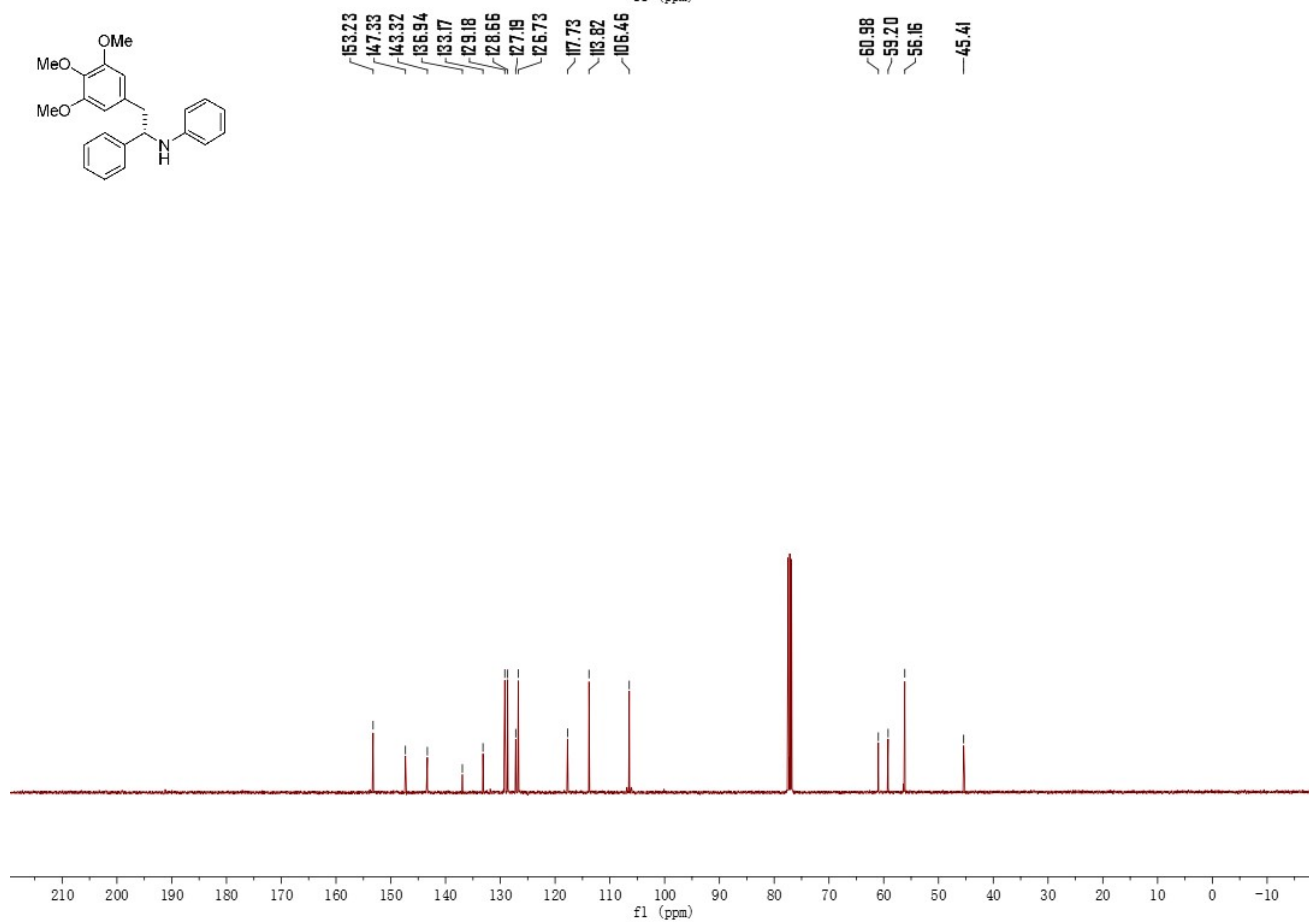

**(S)-N-(2-(4-methoxy-3-methylphenyl)-1-phenylethyl)aniline (3ha)**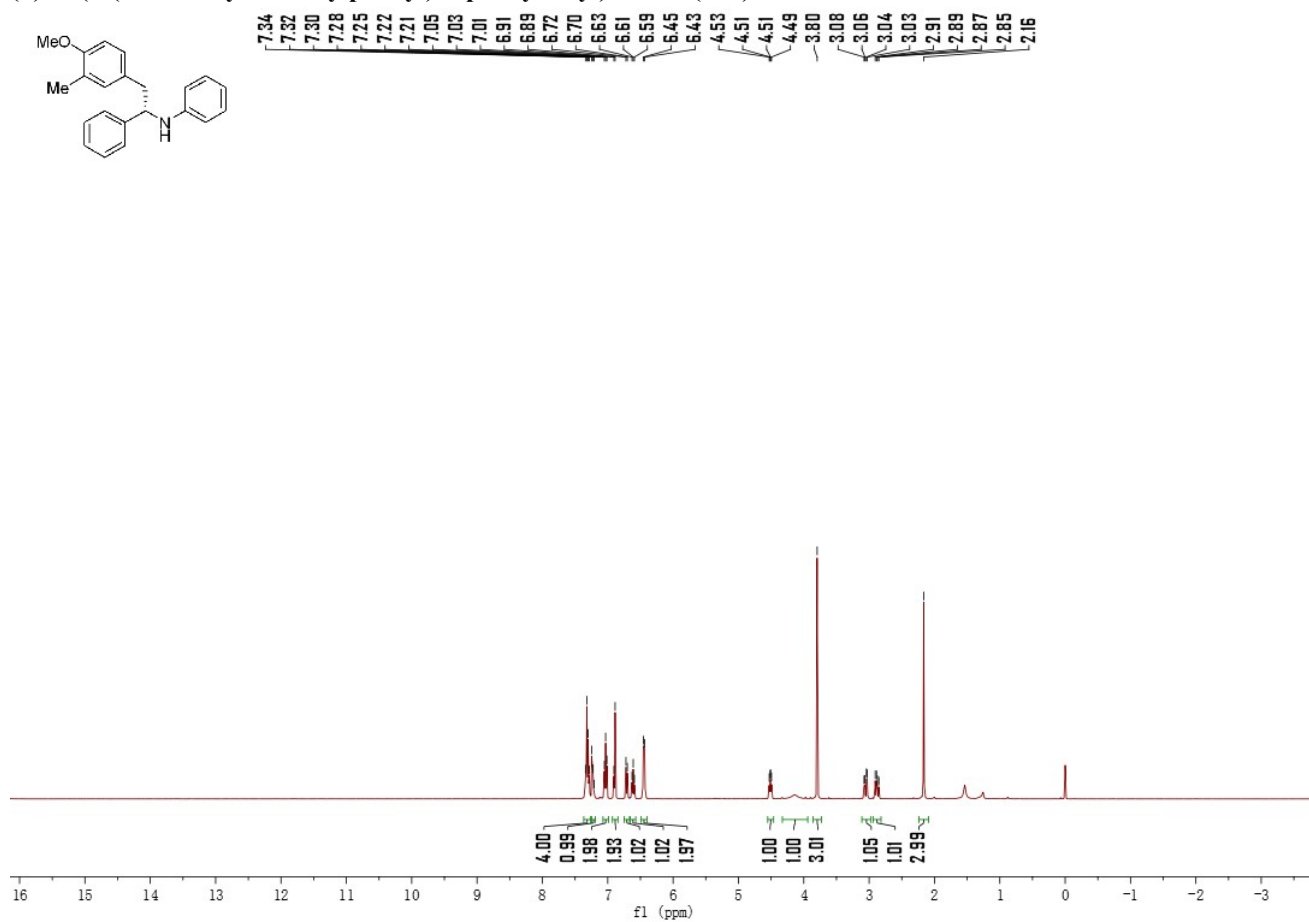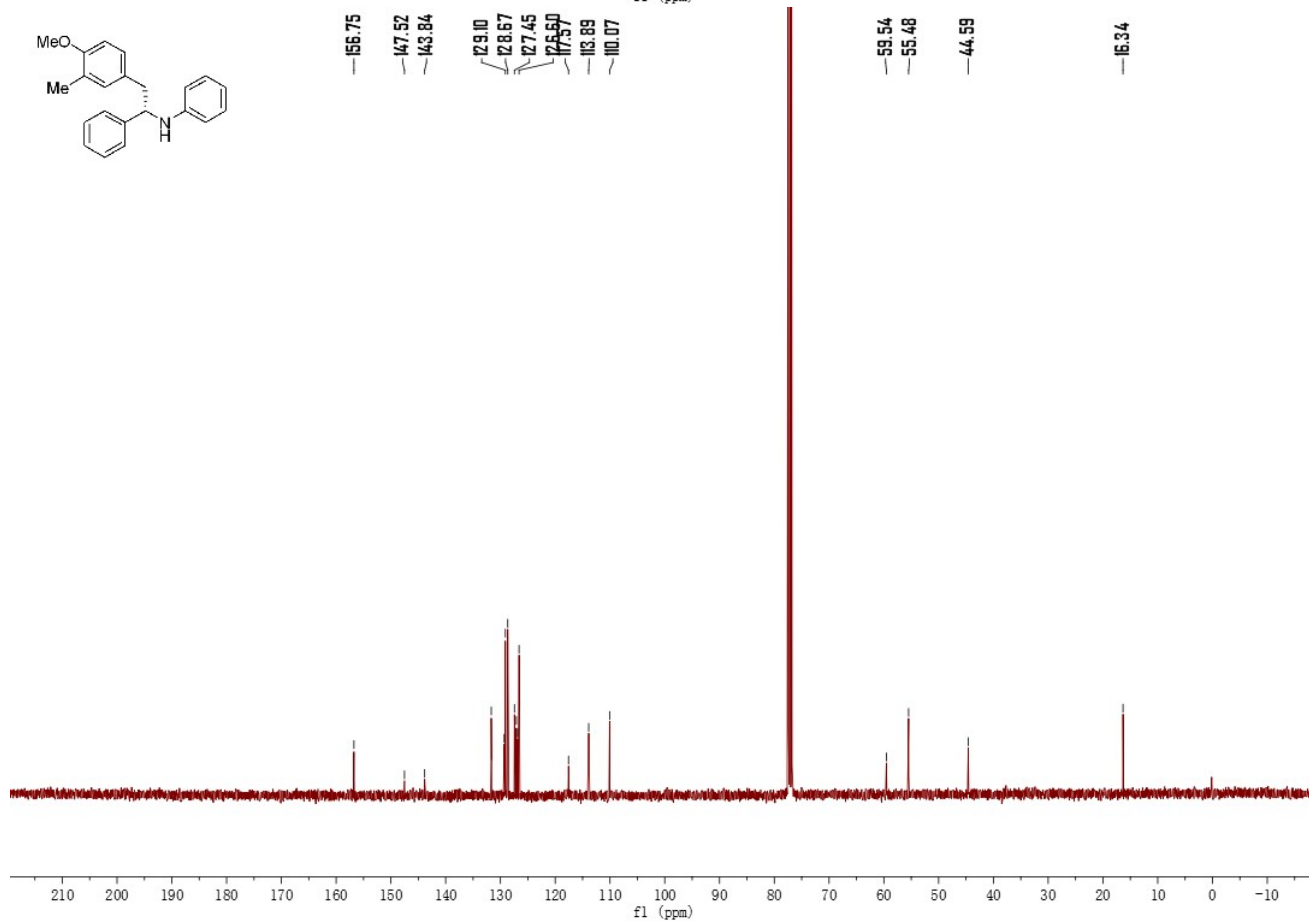**(S)-N-(2-(3-ethoxy-4-methoxyphenyl)-1-phenylethyl)aniline (3ia)**



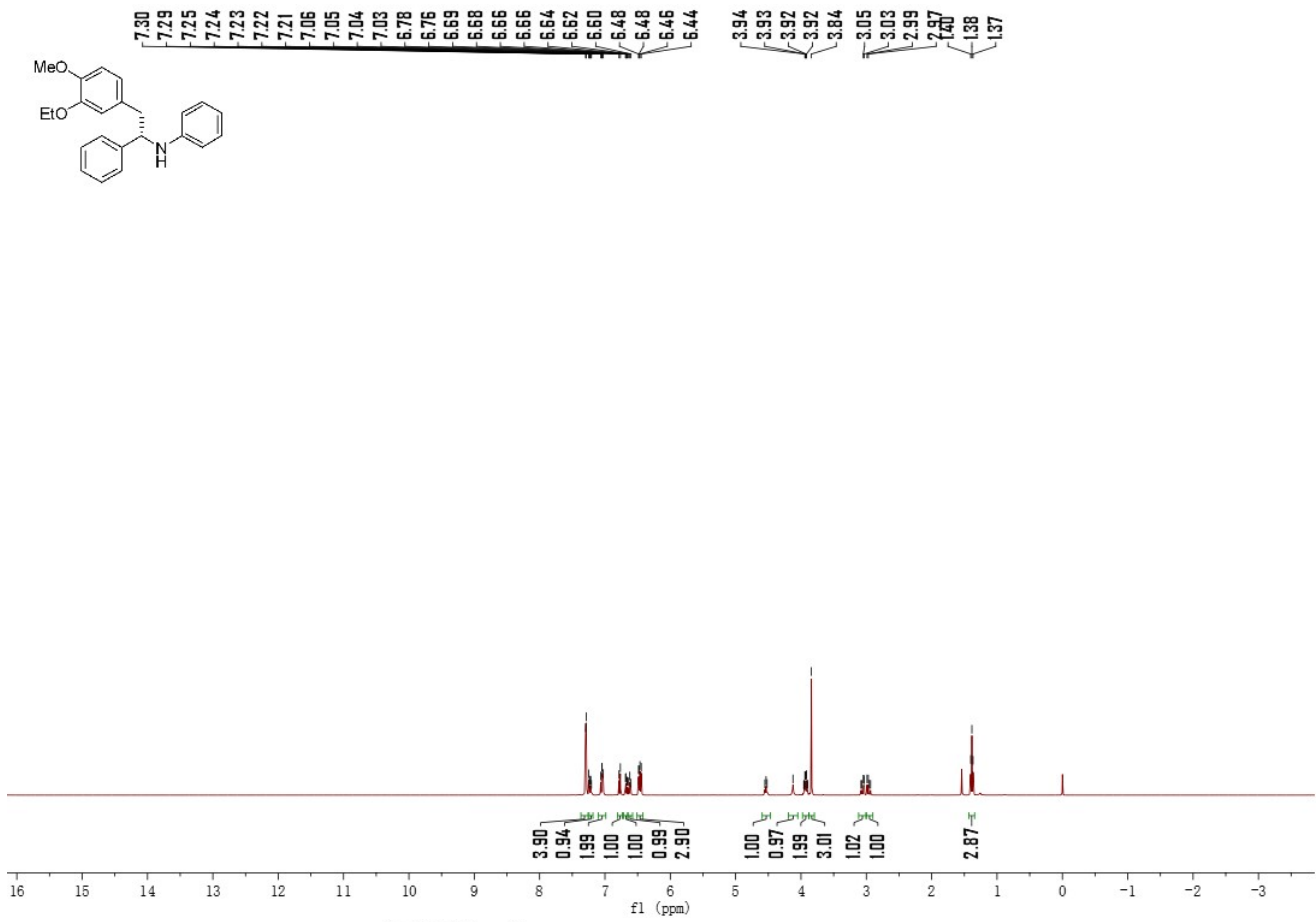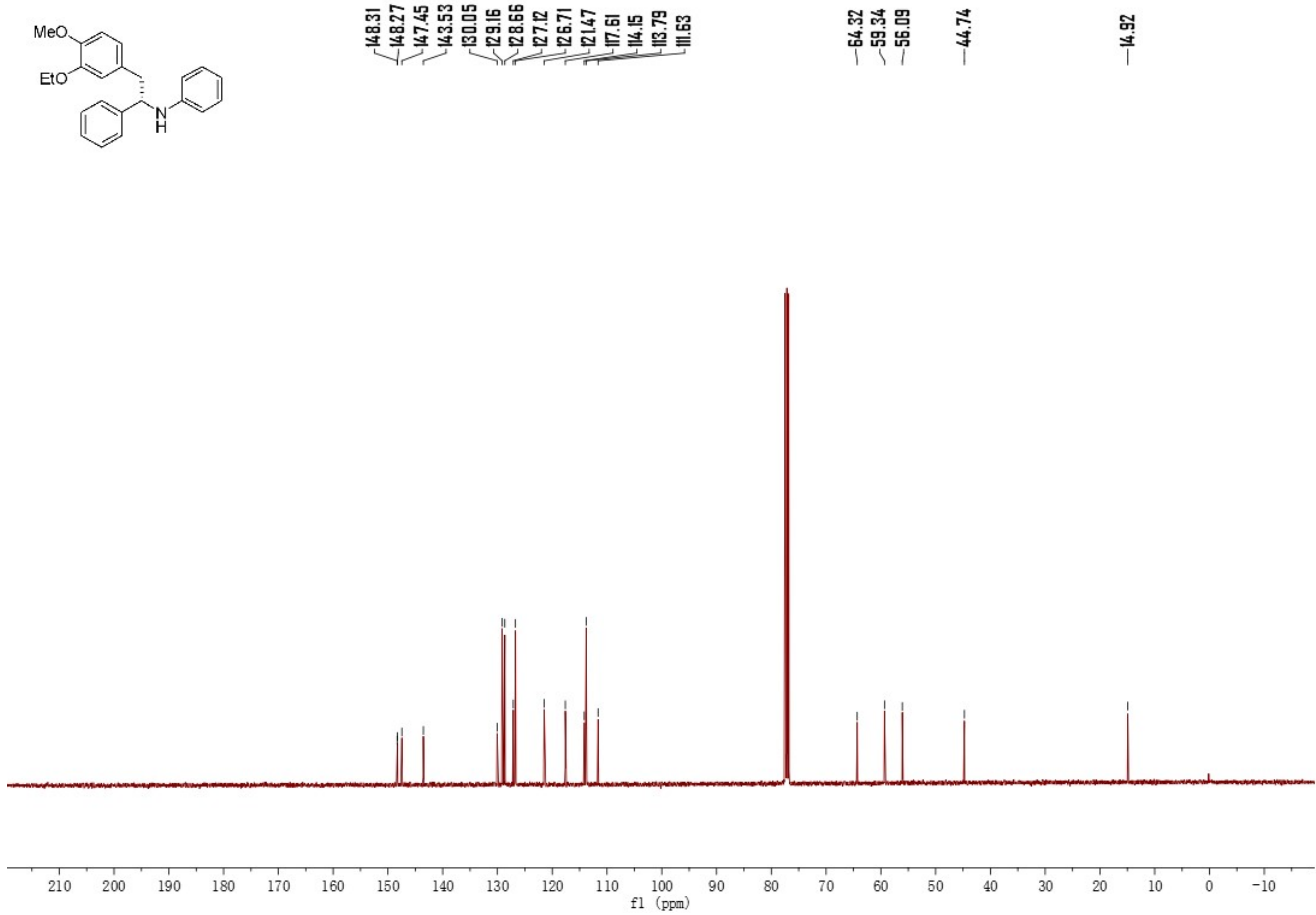

**(S)-N-(2-(4-fluorophenyl)-1-phenylethyl)aniline (3ja)**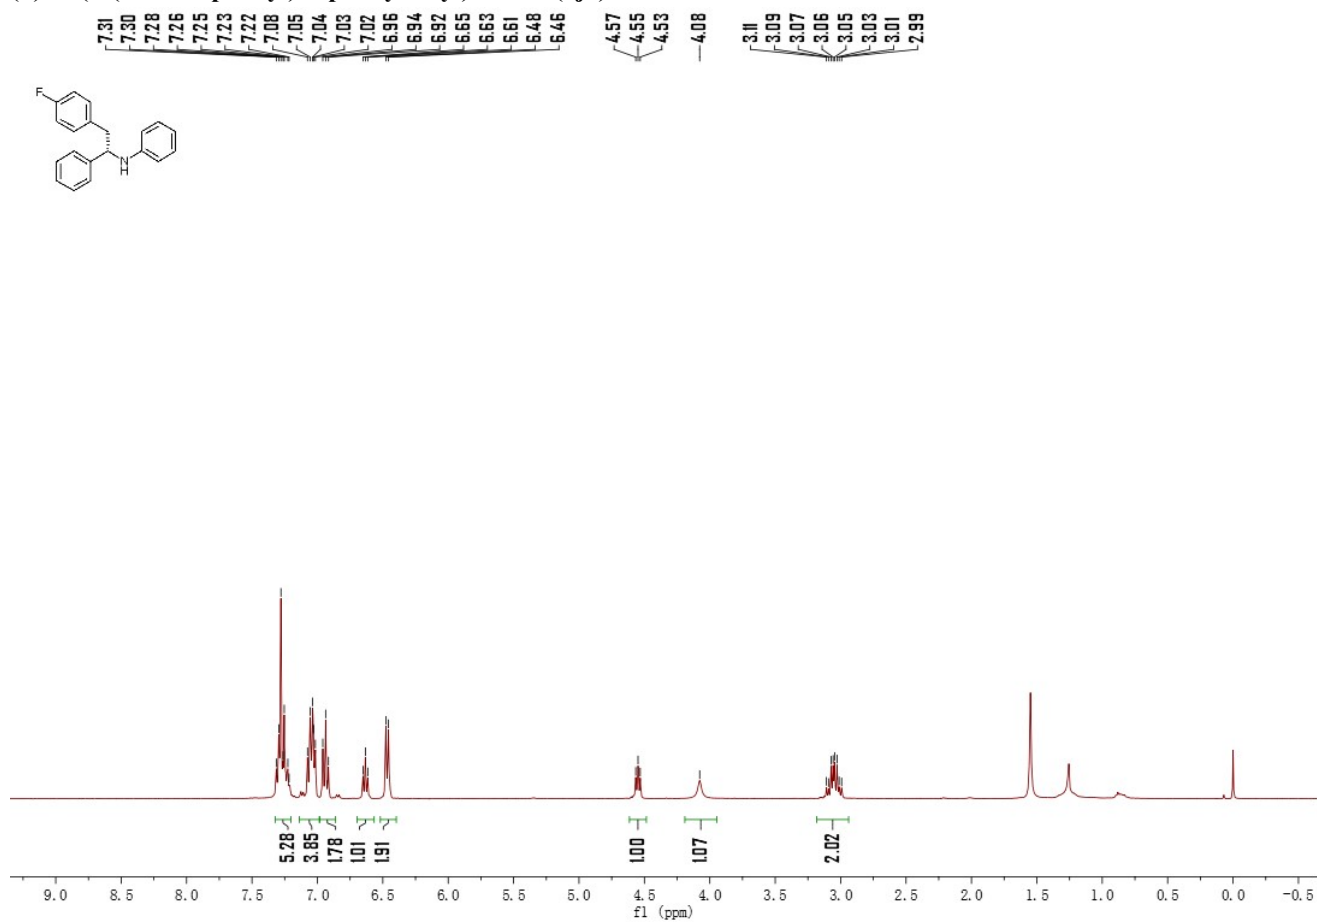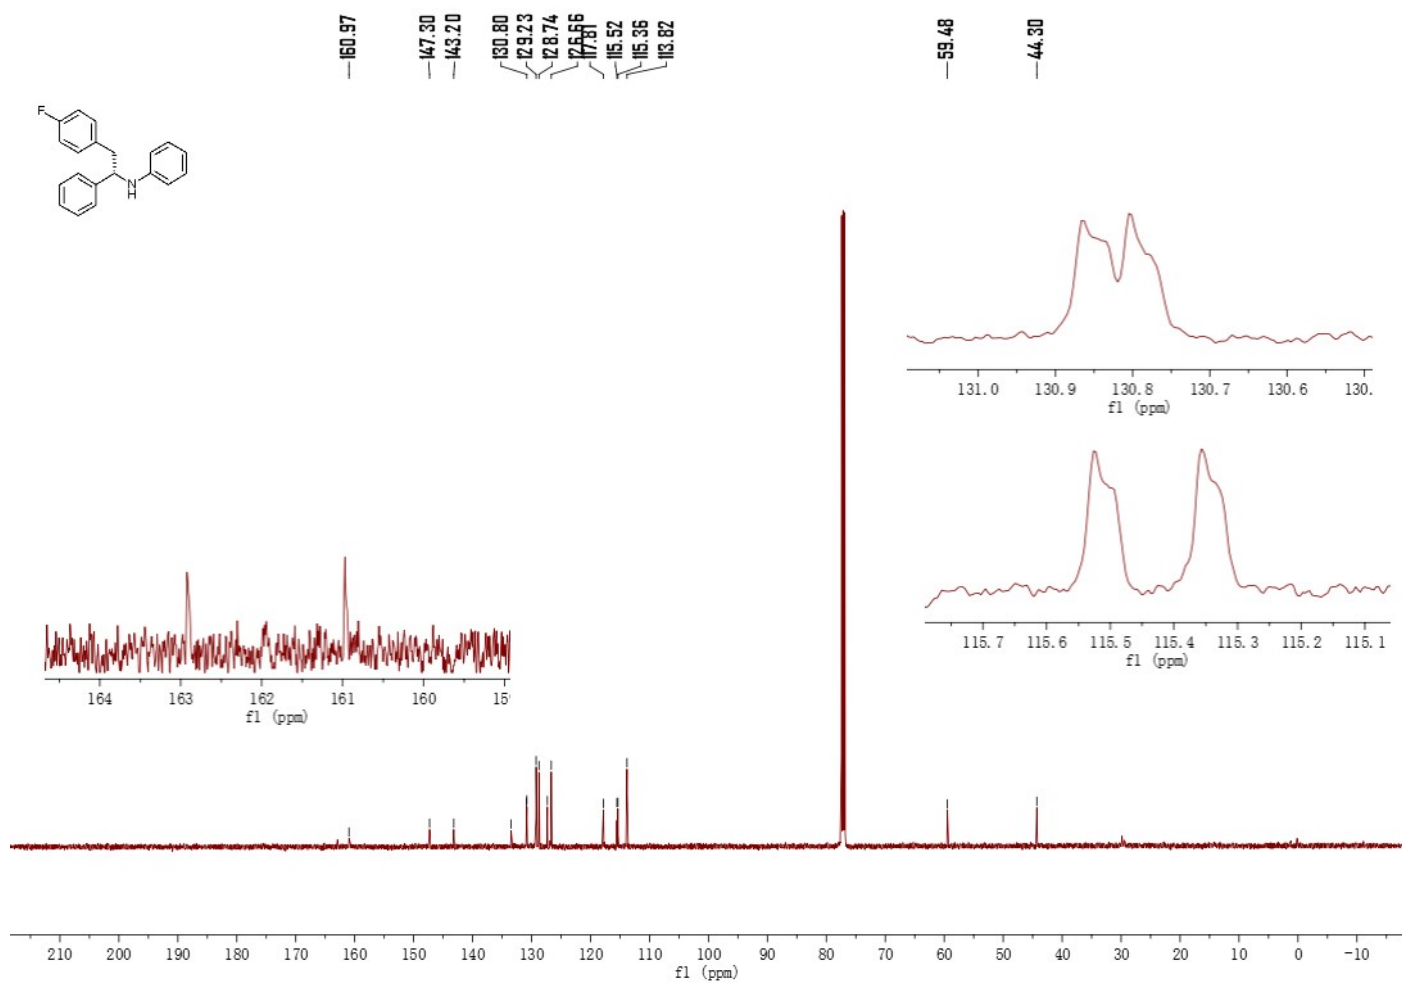

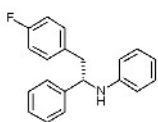

-116.23

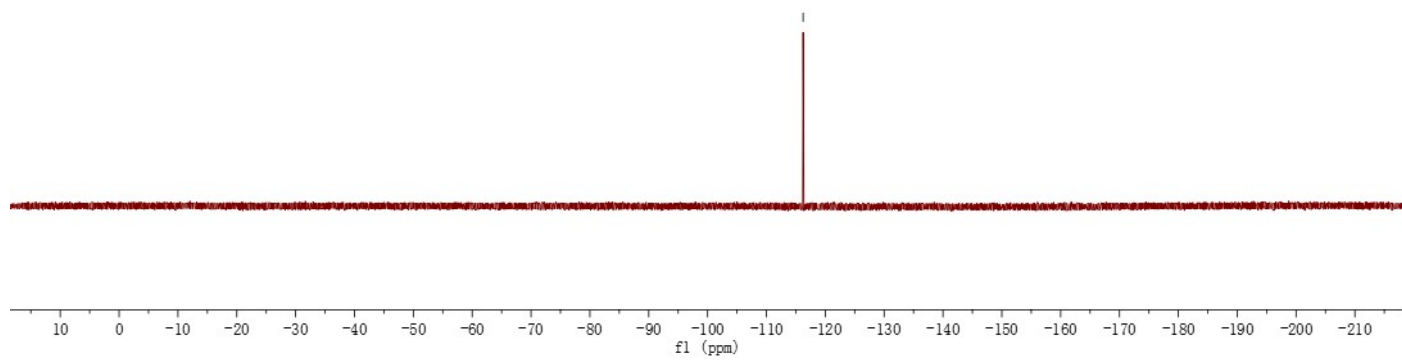

**(S)-N-(2-(3-chloro-4-methoxyphenyl)-1-phenylethyl)aniline (3ka)**

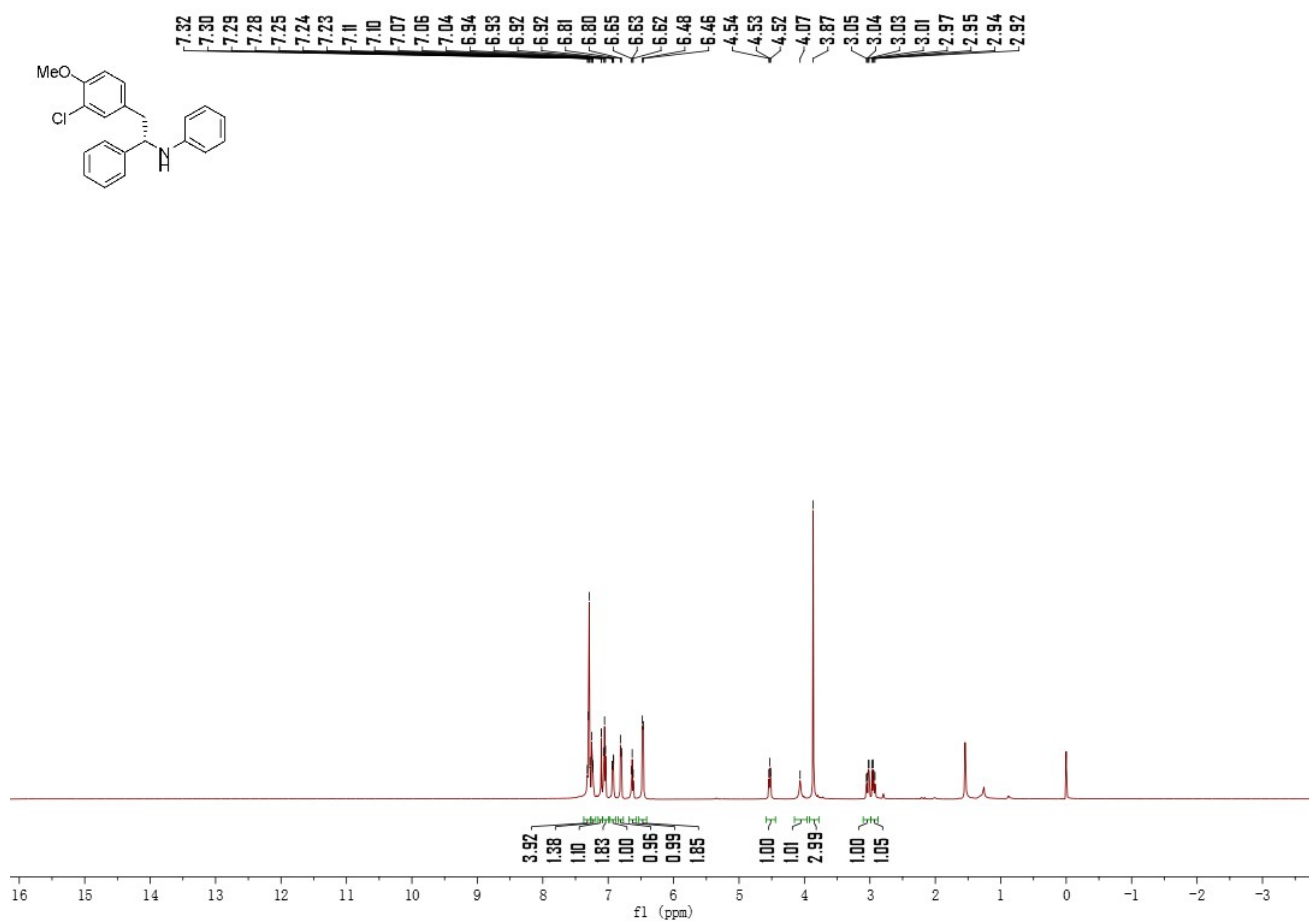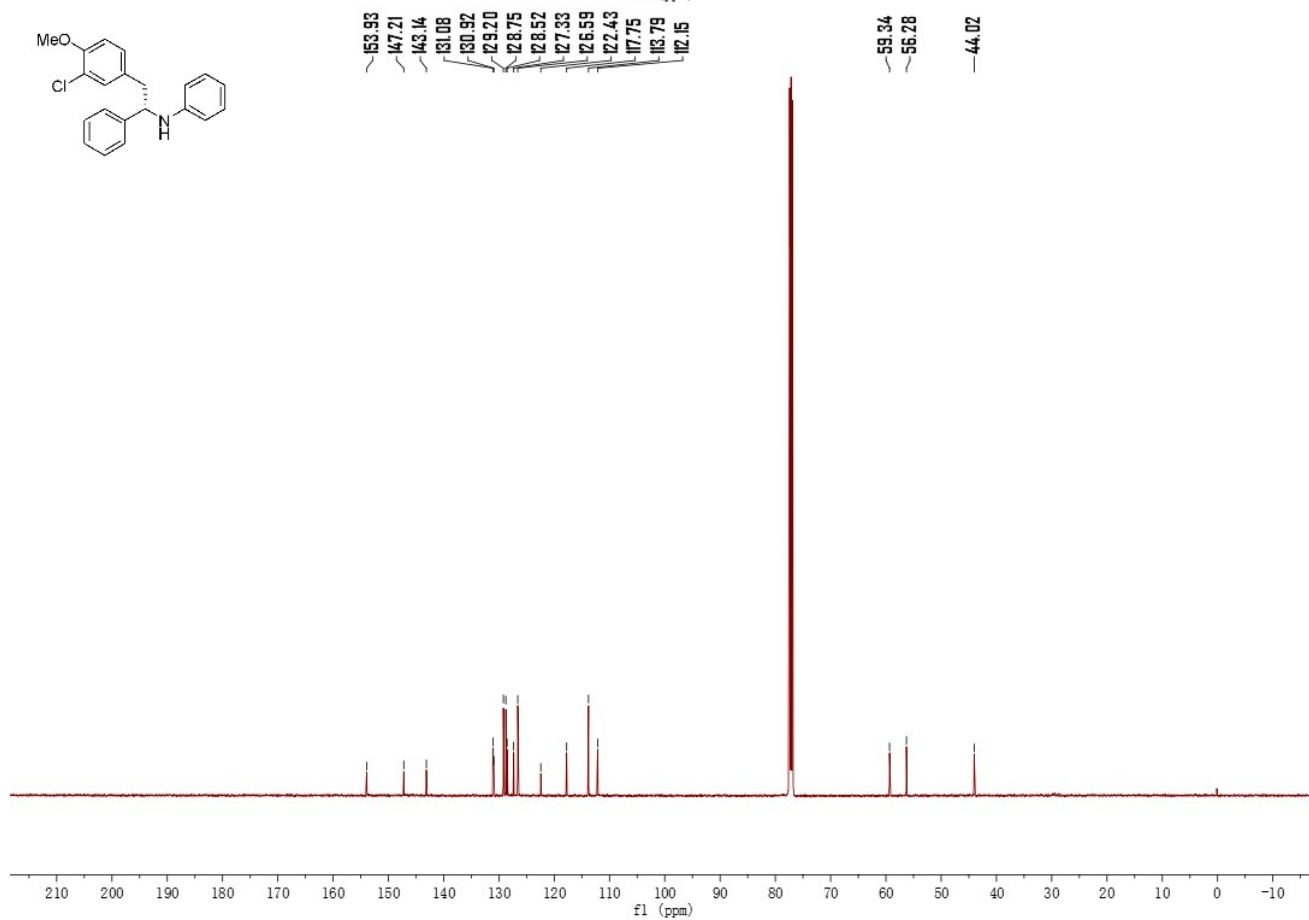

(*S*)-*N*-(2-(2-chloro-3-methoxyphenyl)-1-phenylethyl)aniline (3la)

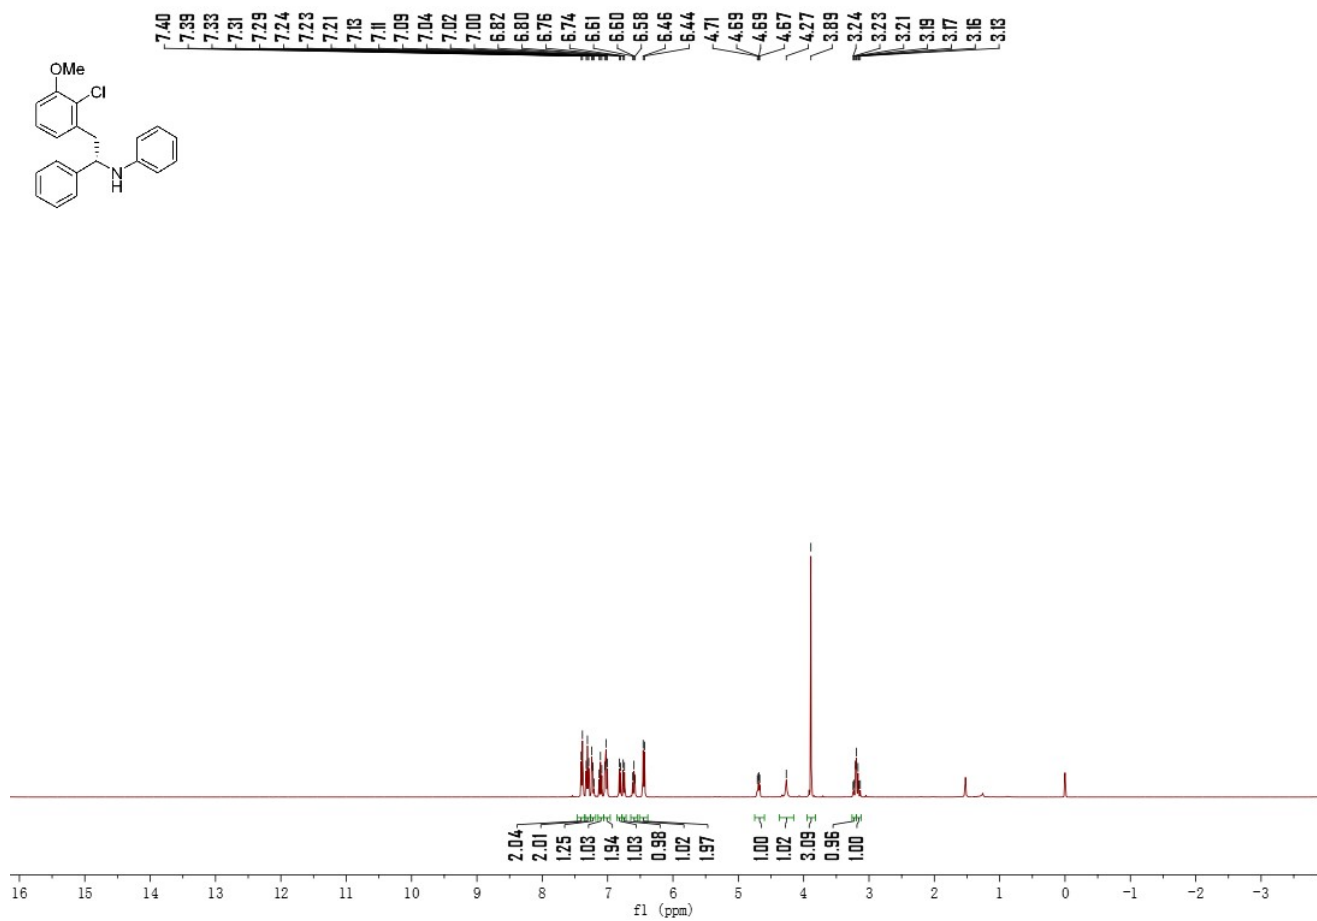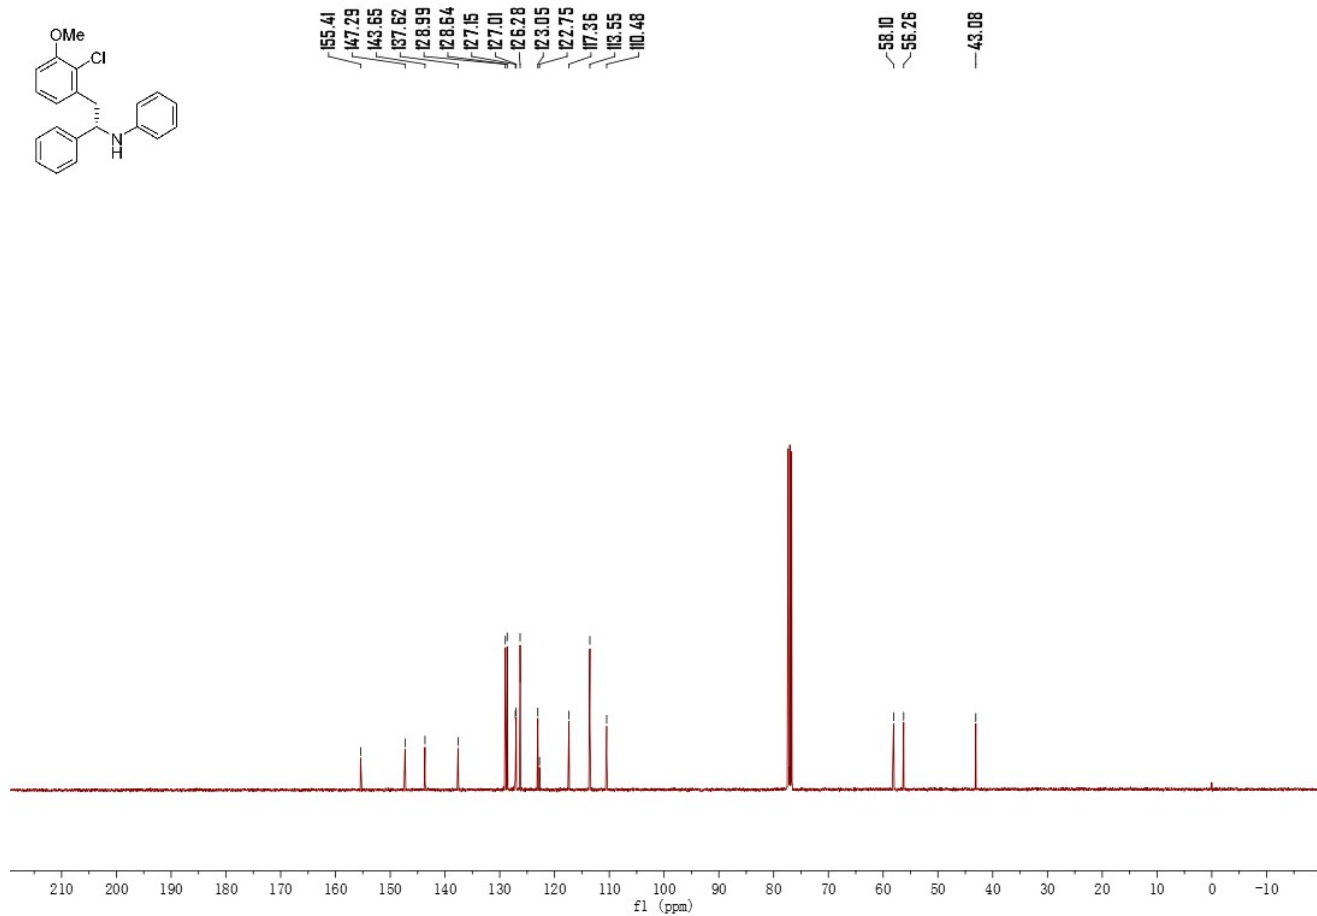

(S)-N-(2-(furan-2-yl)-1-phenylethyl)aniline (3ma)

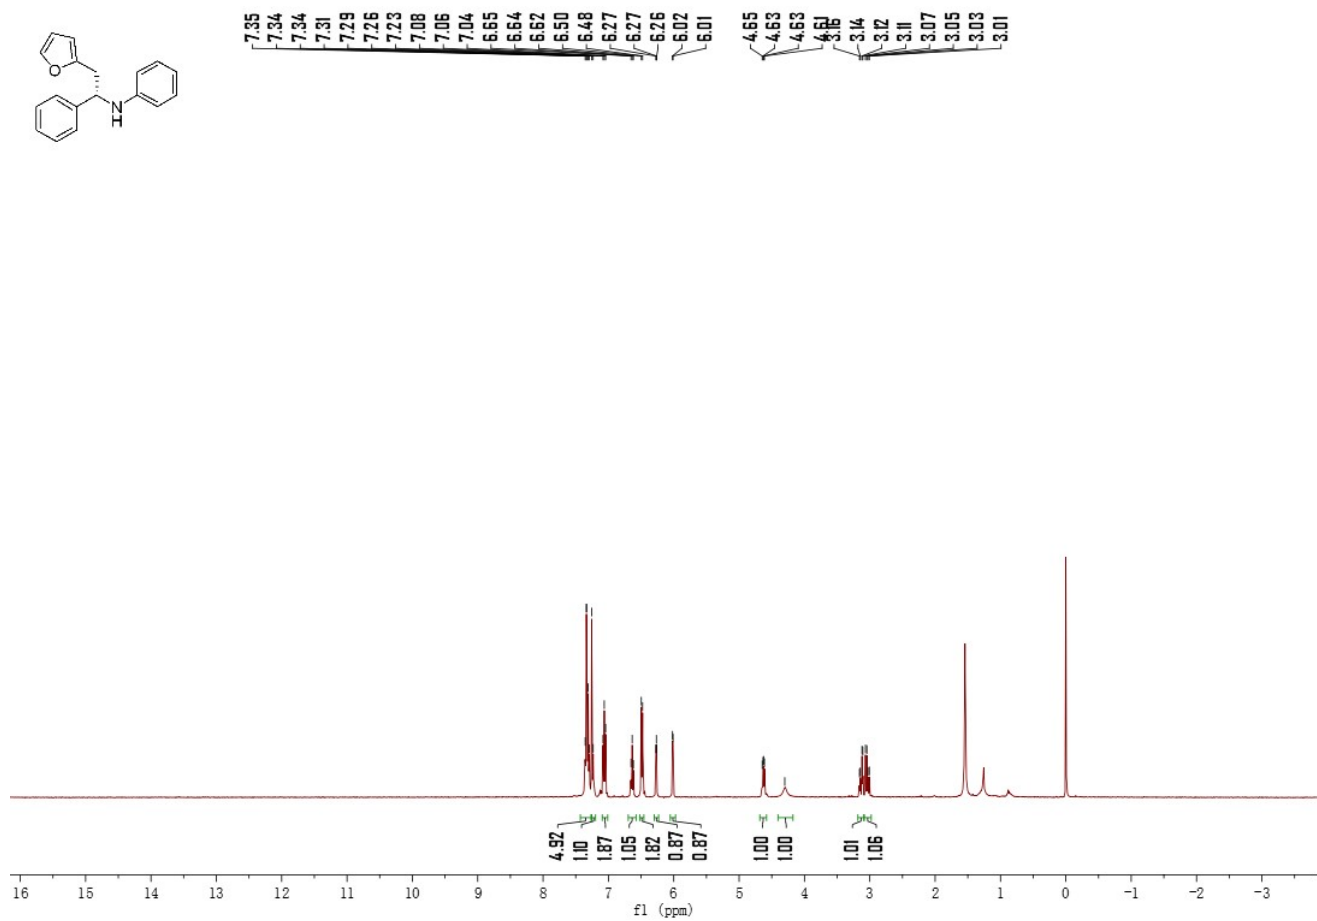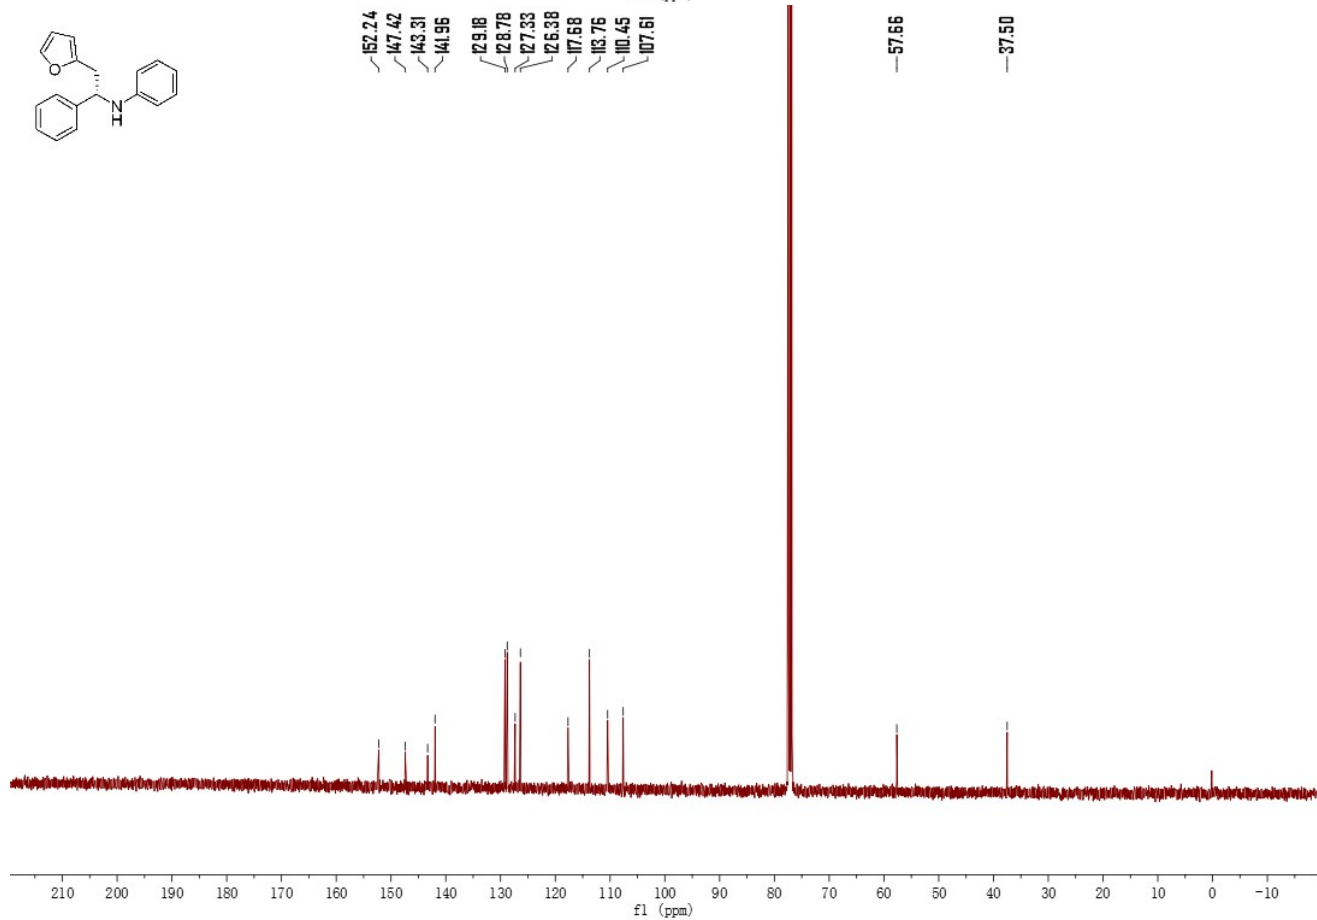

**(S)-N-(1-phenyl-2-(thiophen-2-yl)ethyl)aniline (3na)**

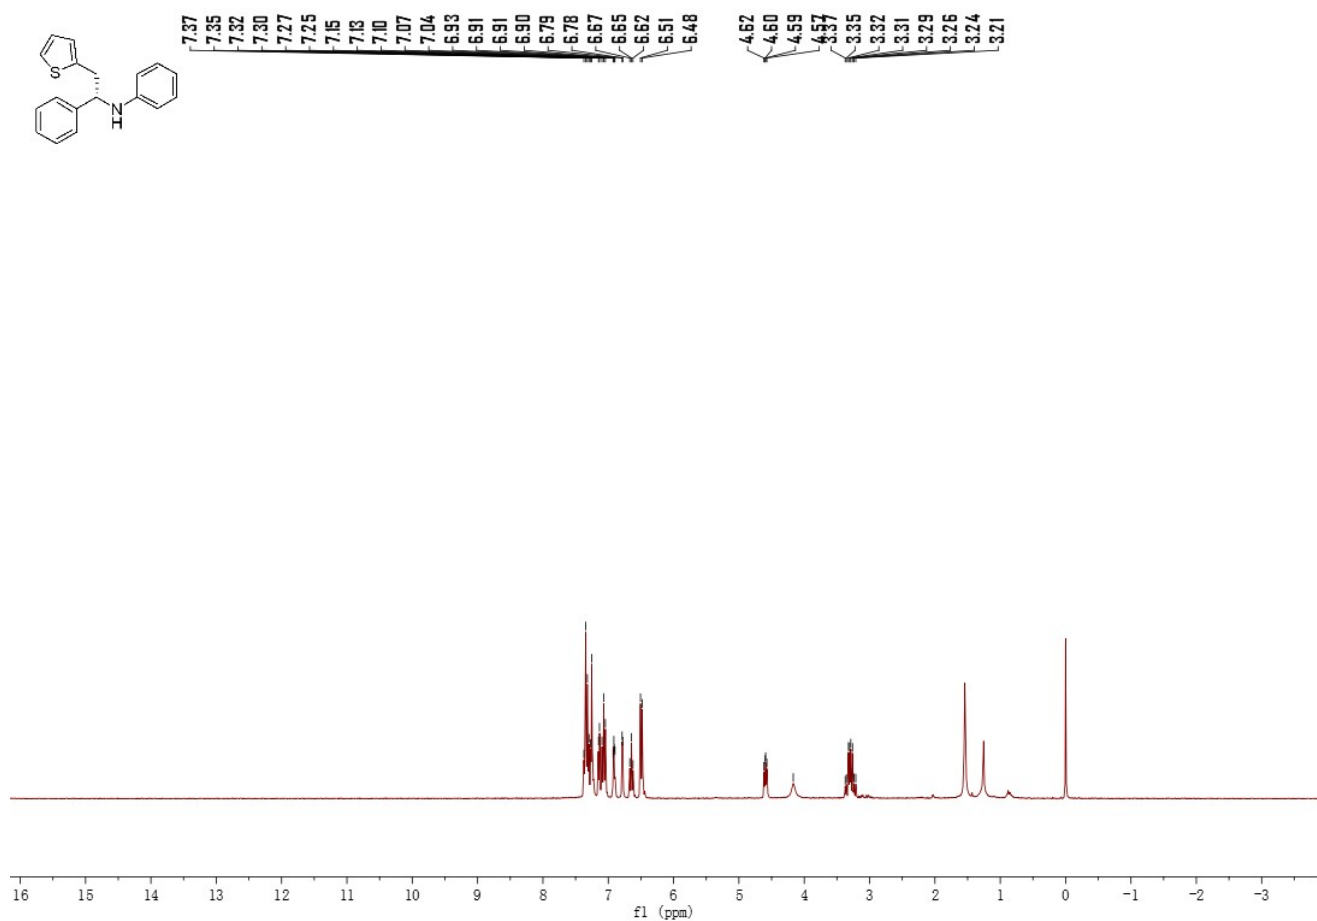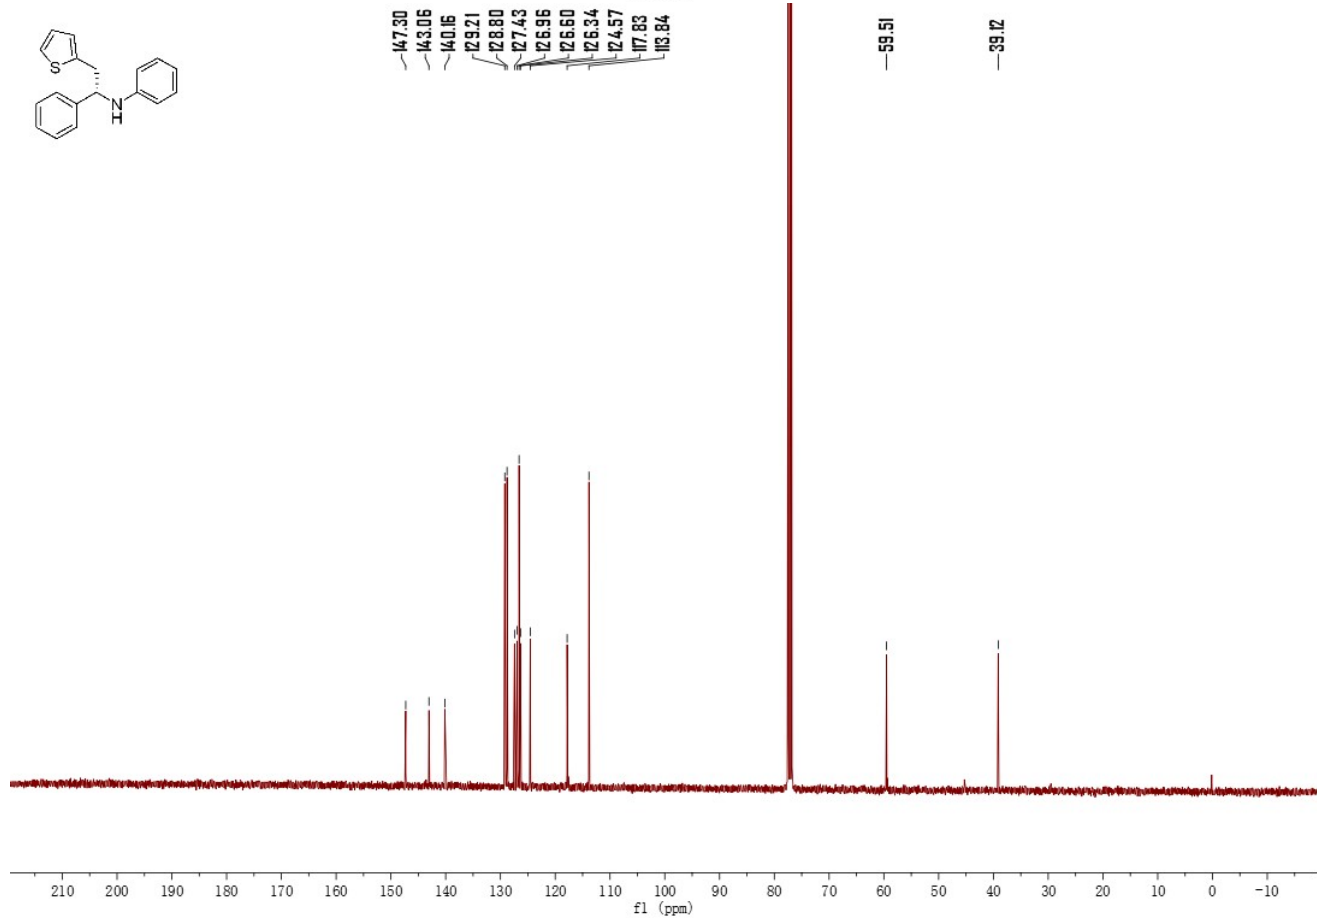

(*S*)-*N*-(1-phenylheptyl)aniline (30a)

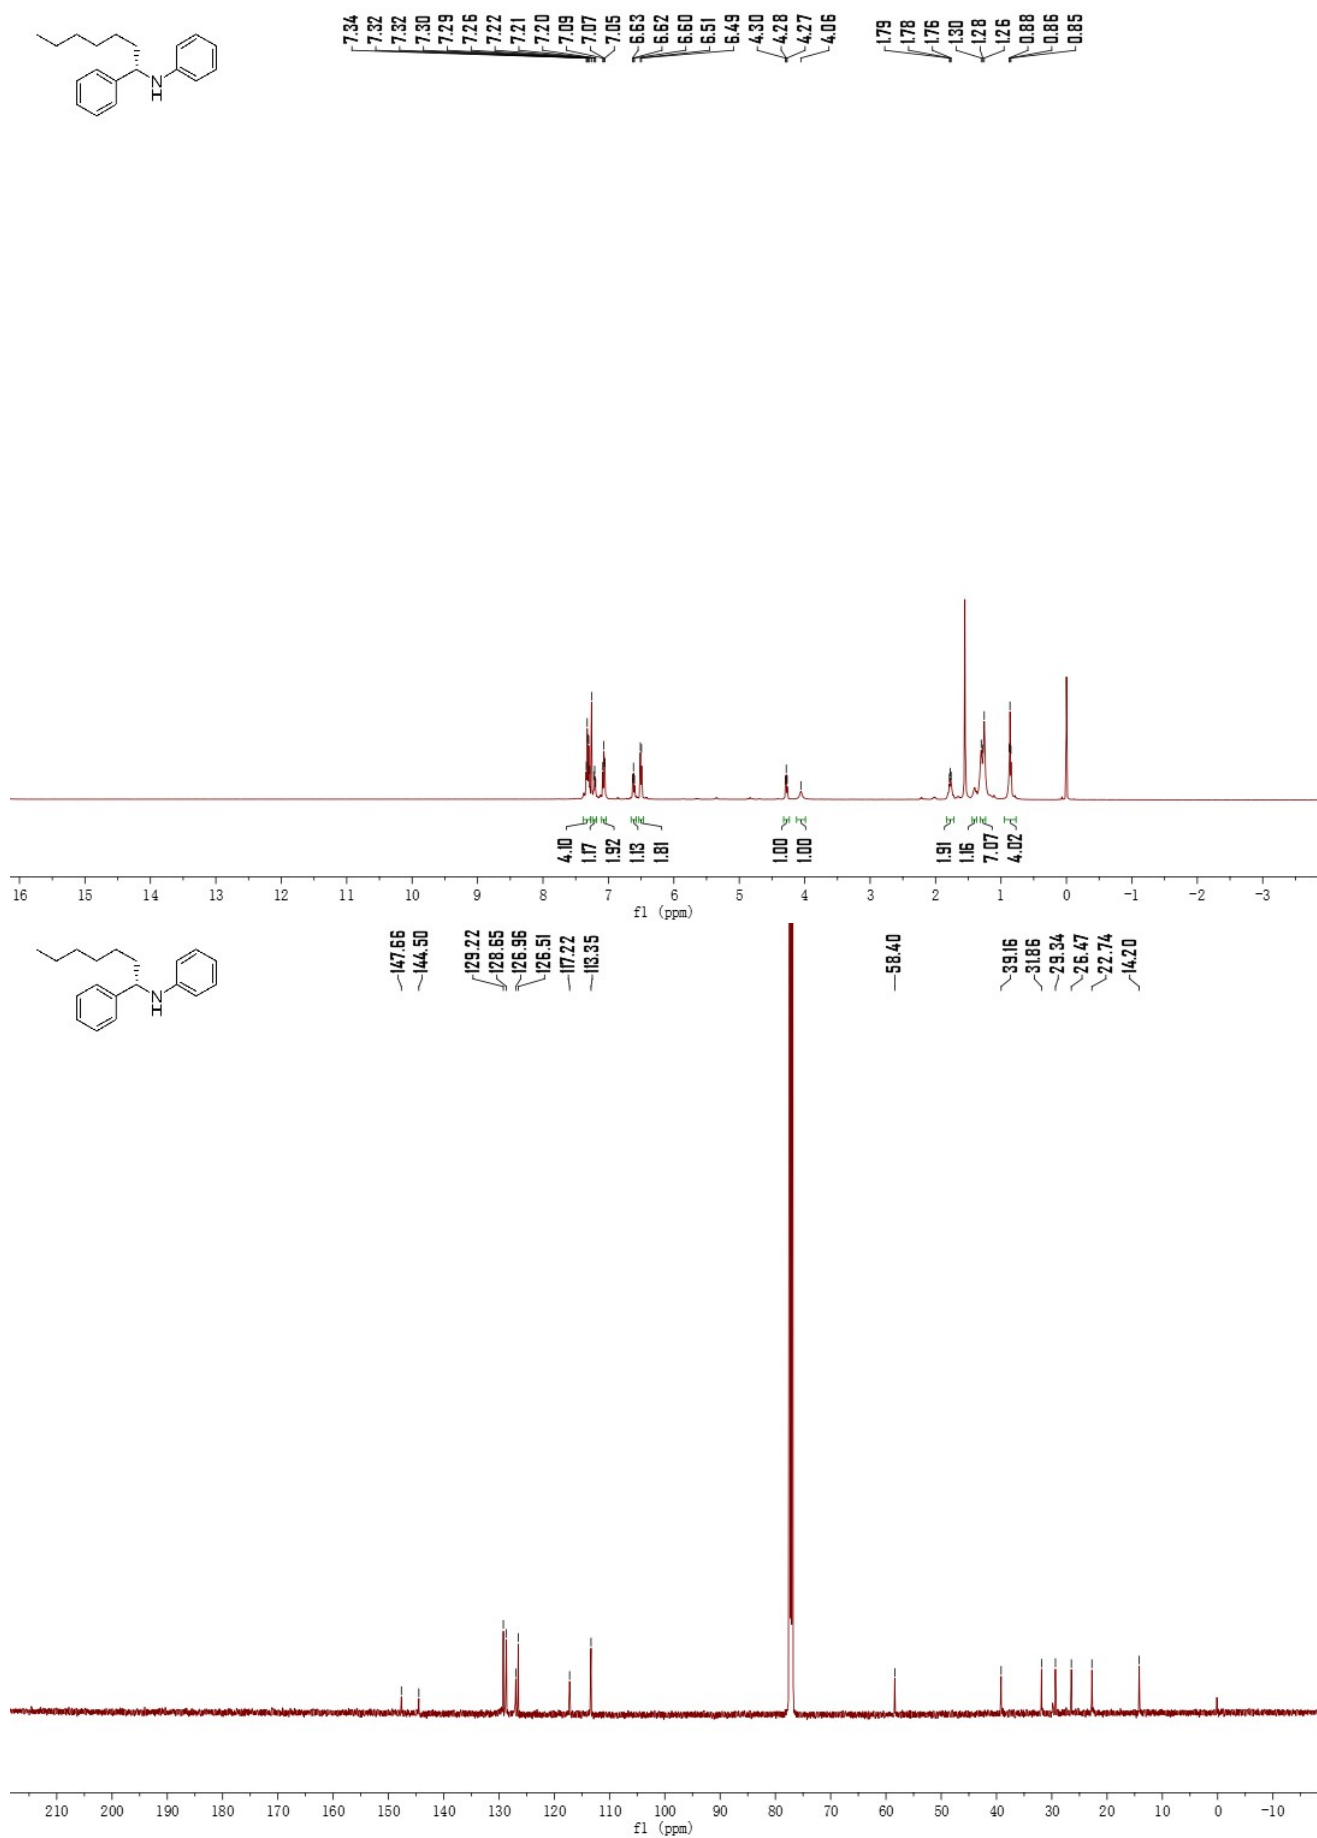

(S)-N-(1-(4-fluorophenyl)-2-phenylethyl)aniline (3ab)



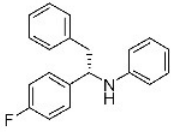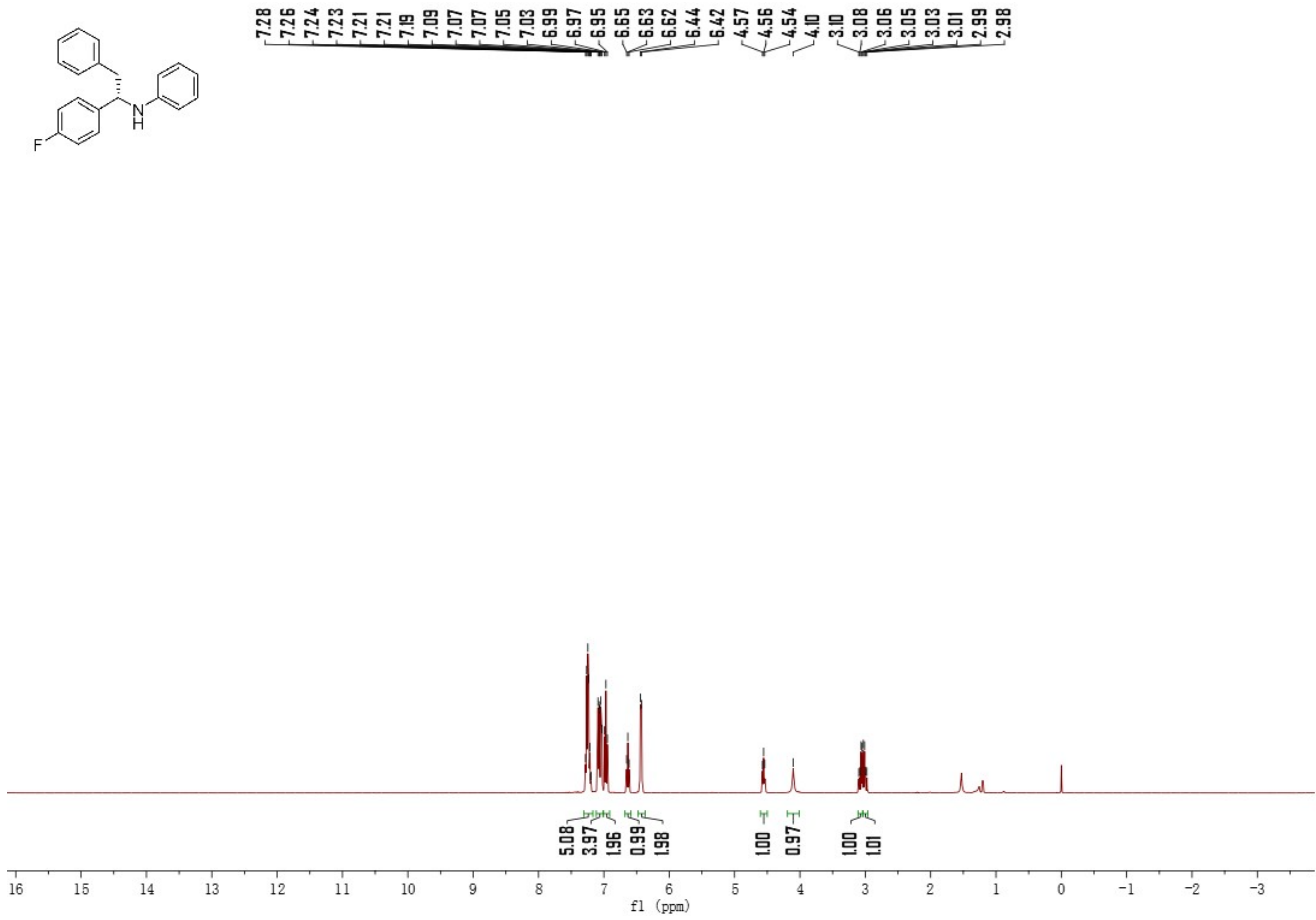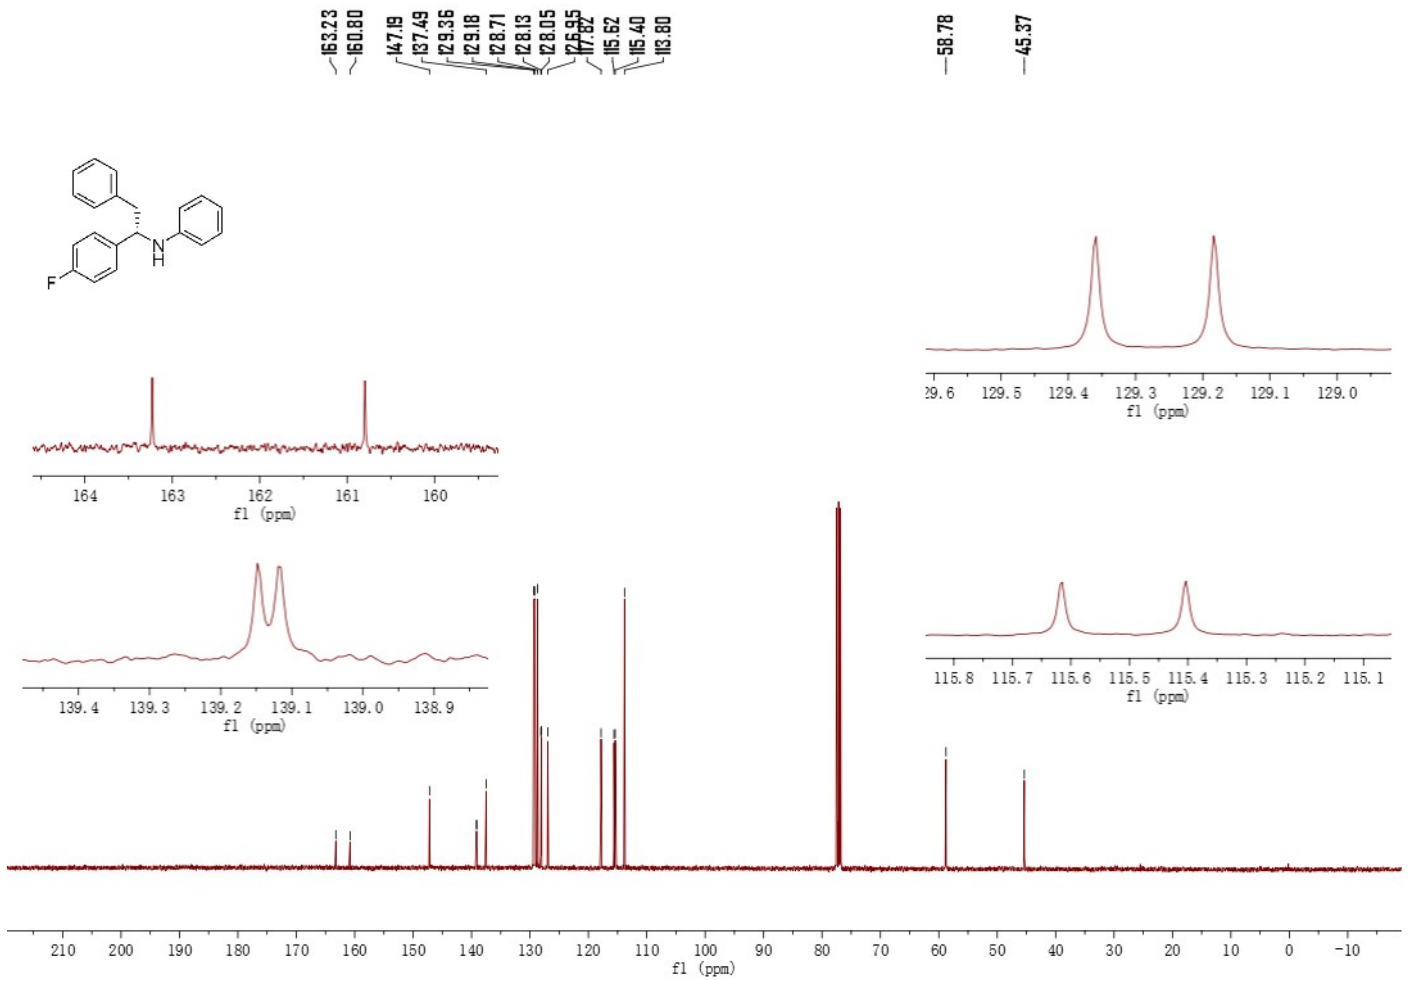

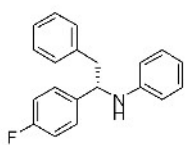

115.88

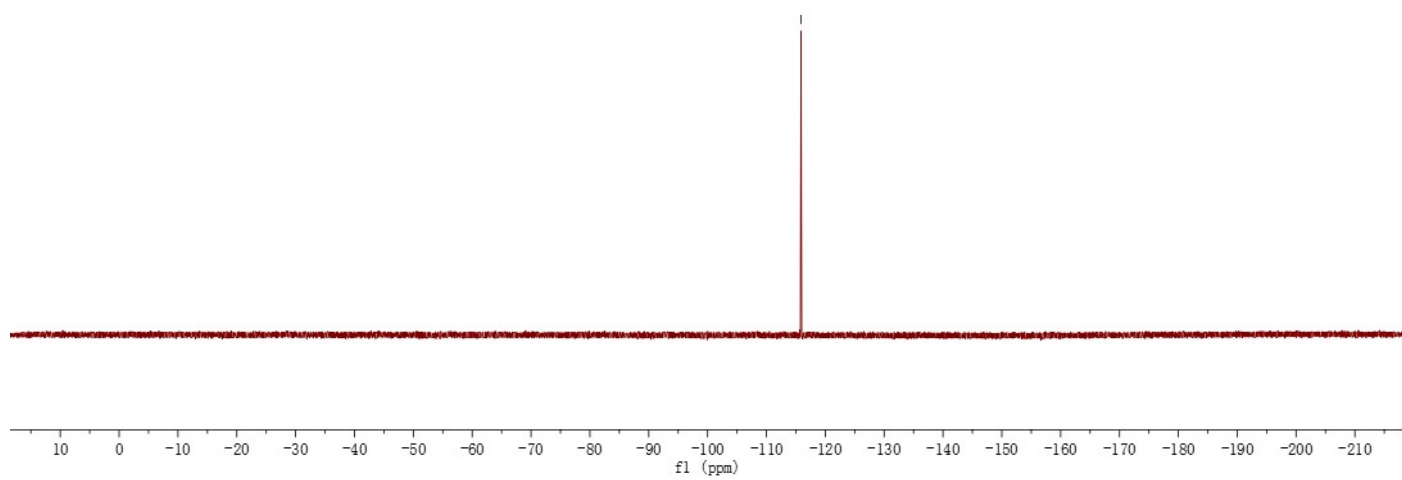

**(S)-N-(1-(4-bromophenyl)-2-phenylethyl)aniline (3ac)**

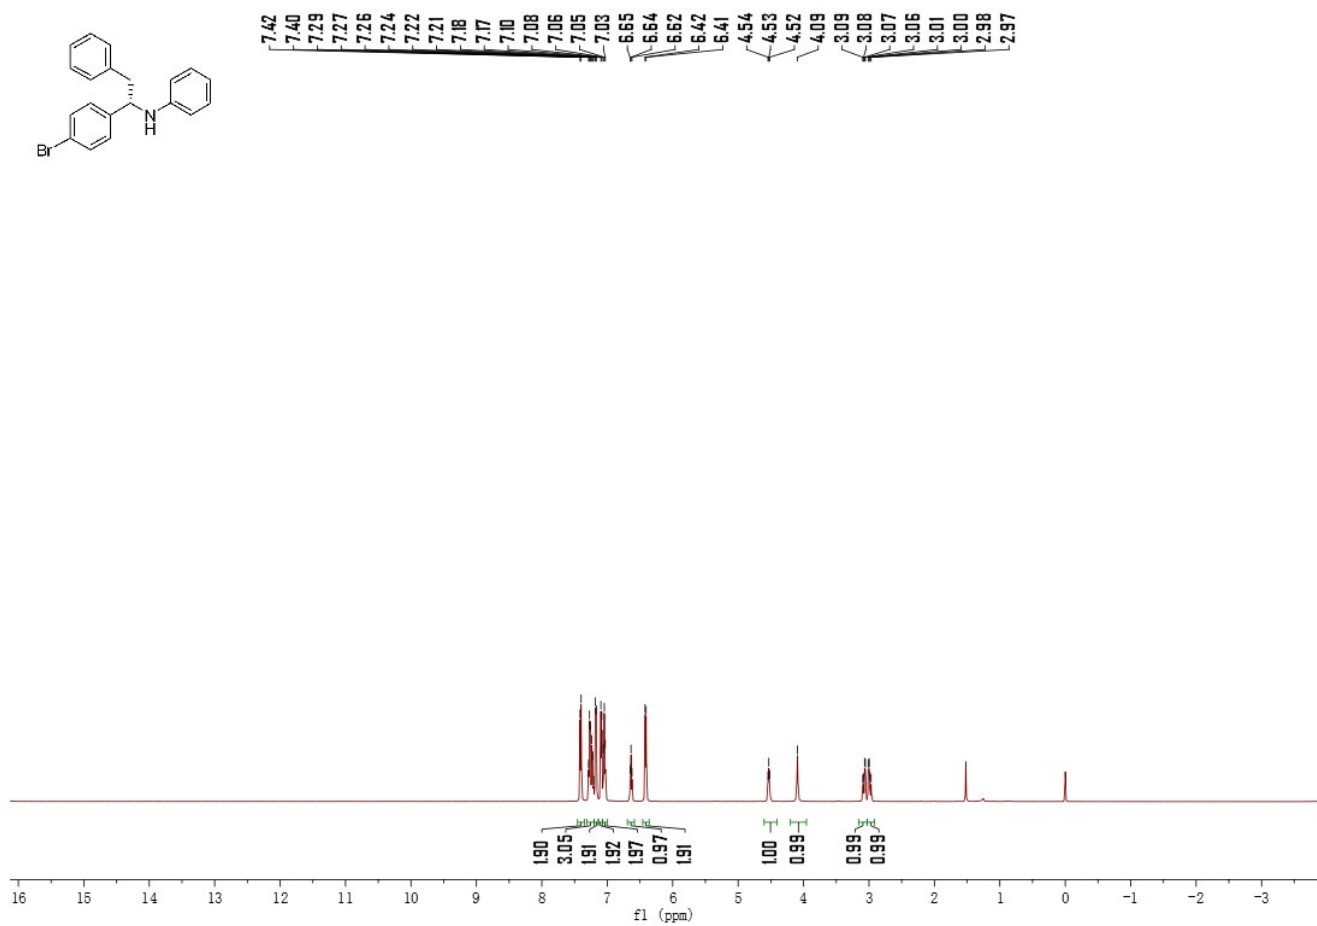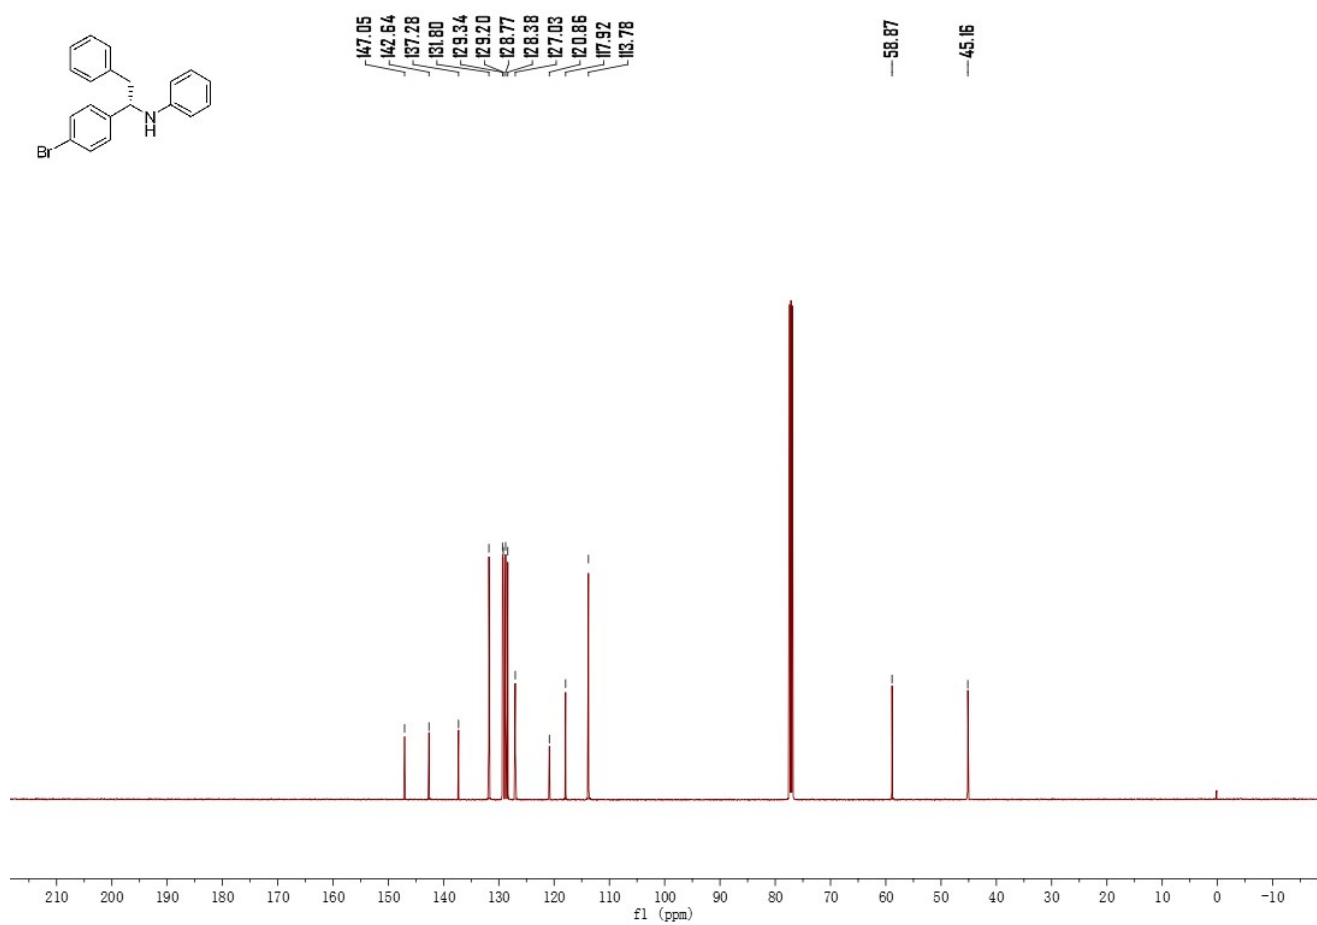

**(S)-N-(1-(4-iodophenyl)-2-phenylethyl)aniline (3ad)**

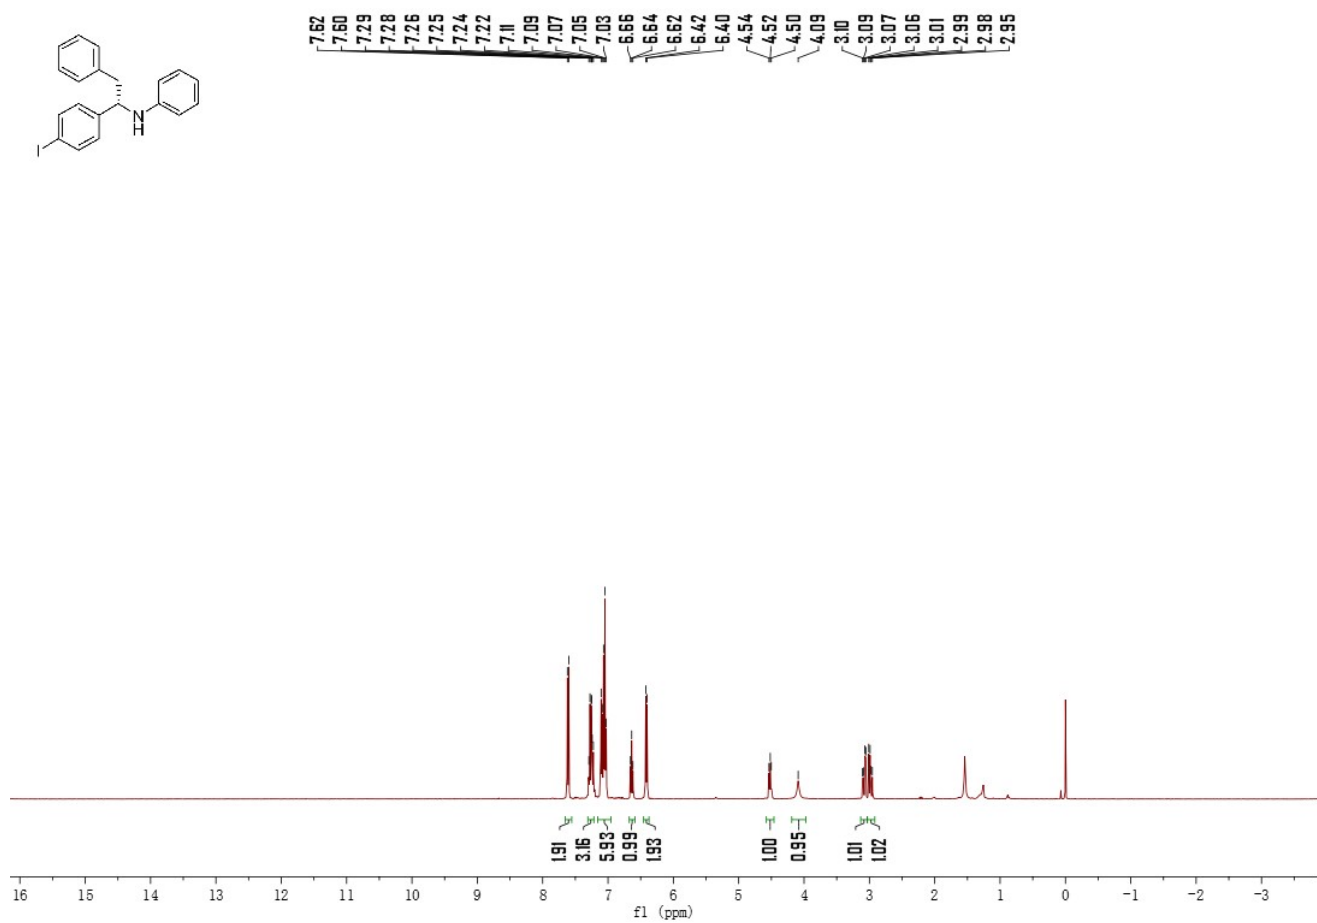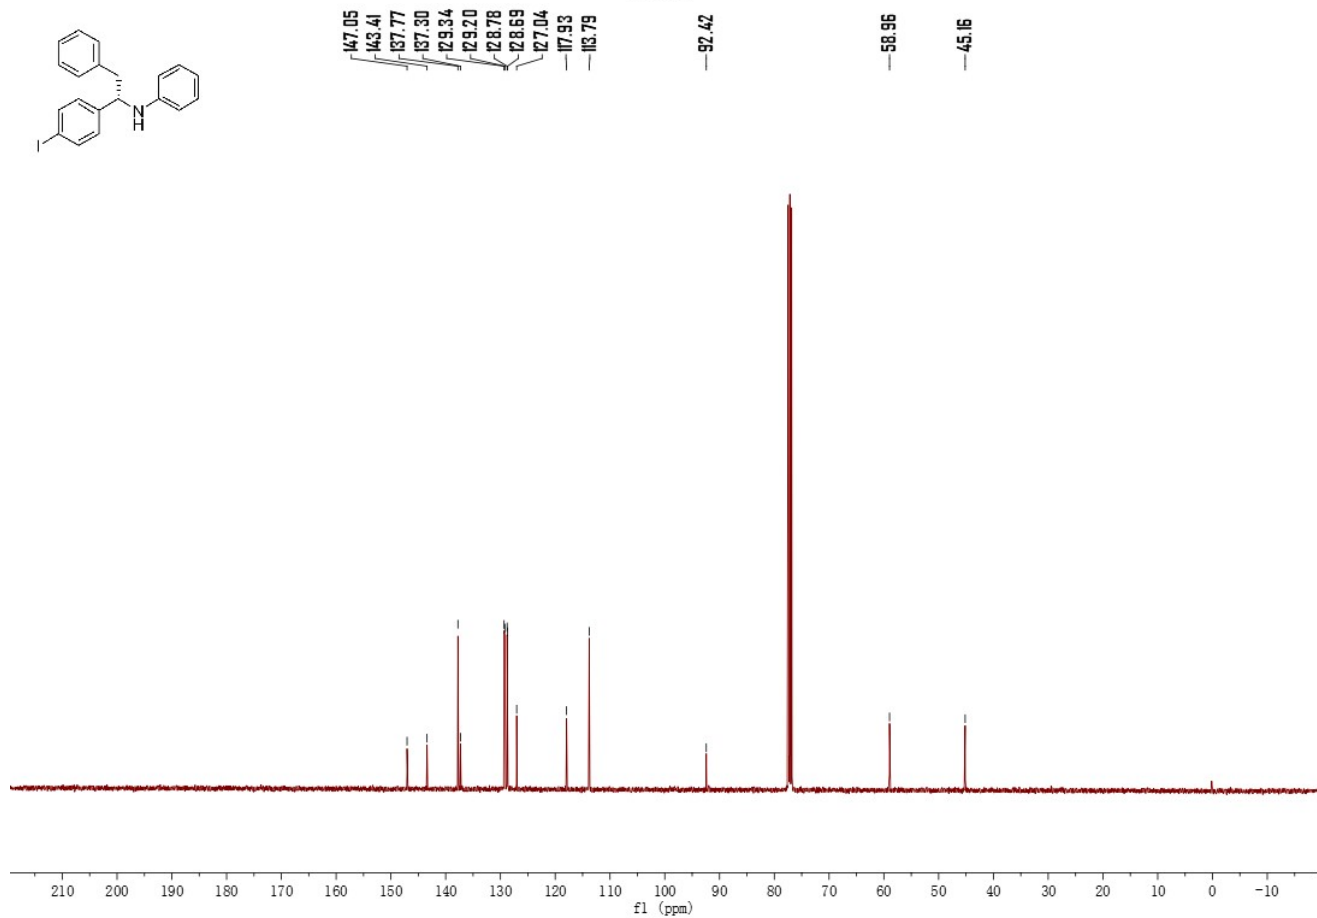

(*S*)-*N*-(2-phenyl-1-(4-(trifluoromethyl)phenyl)ethyl)aniline (3ae)

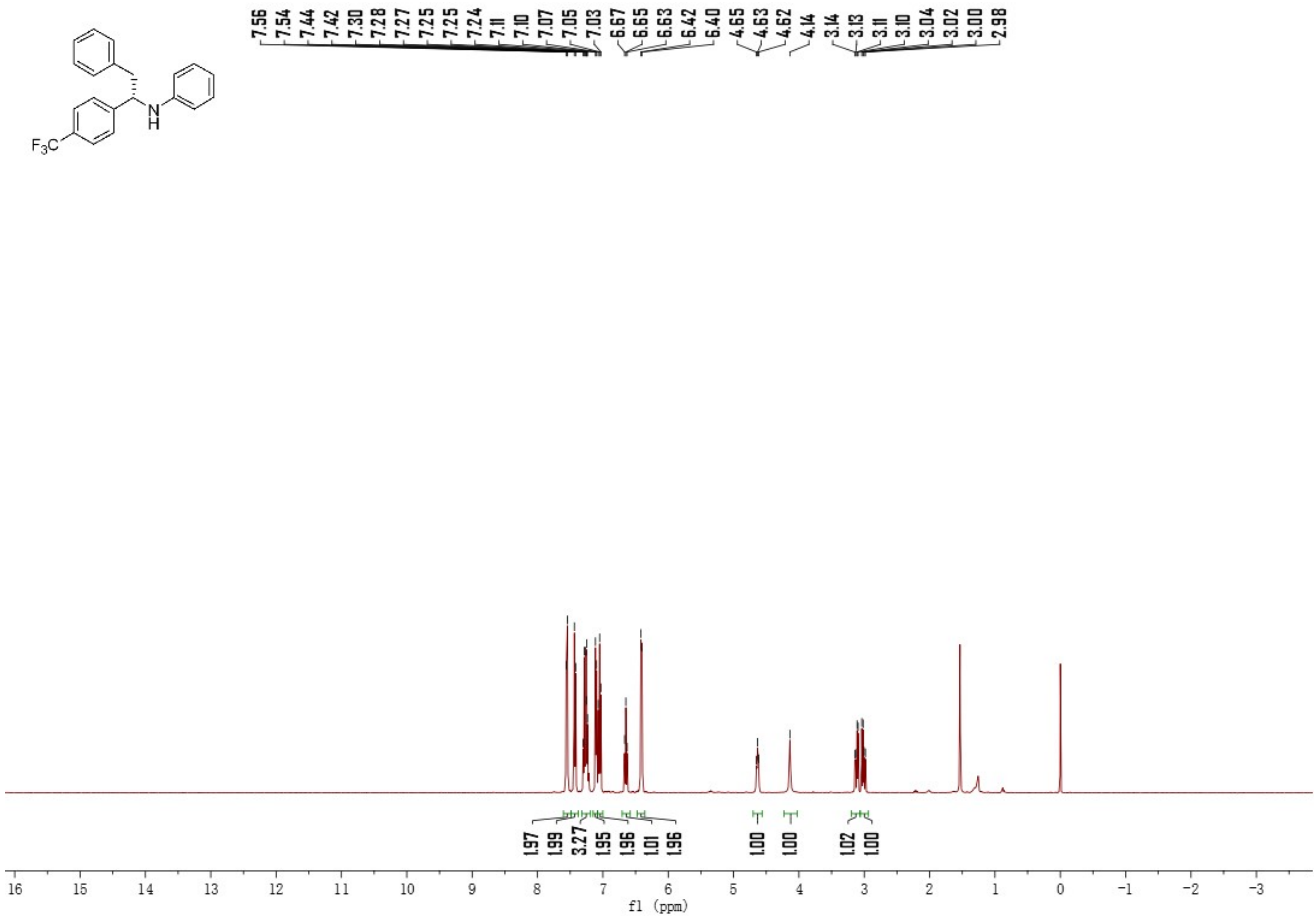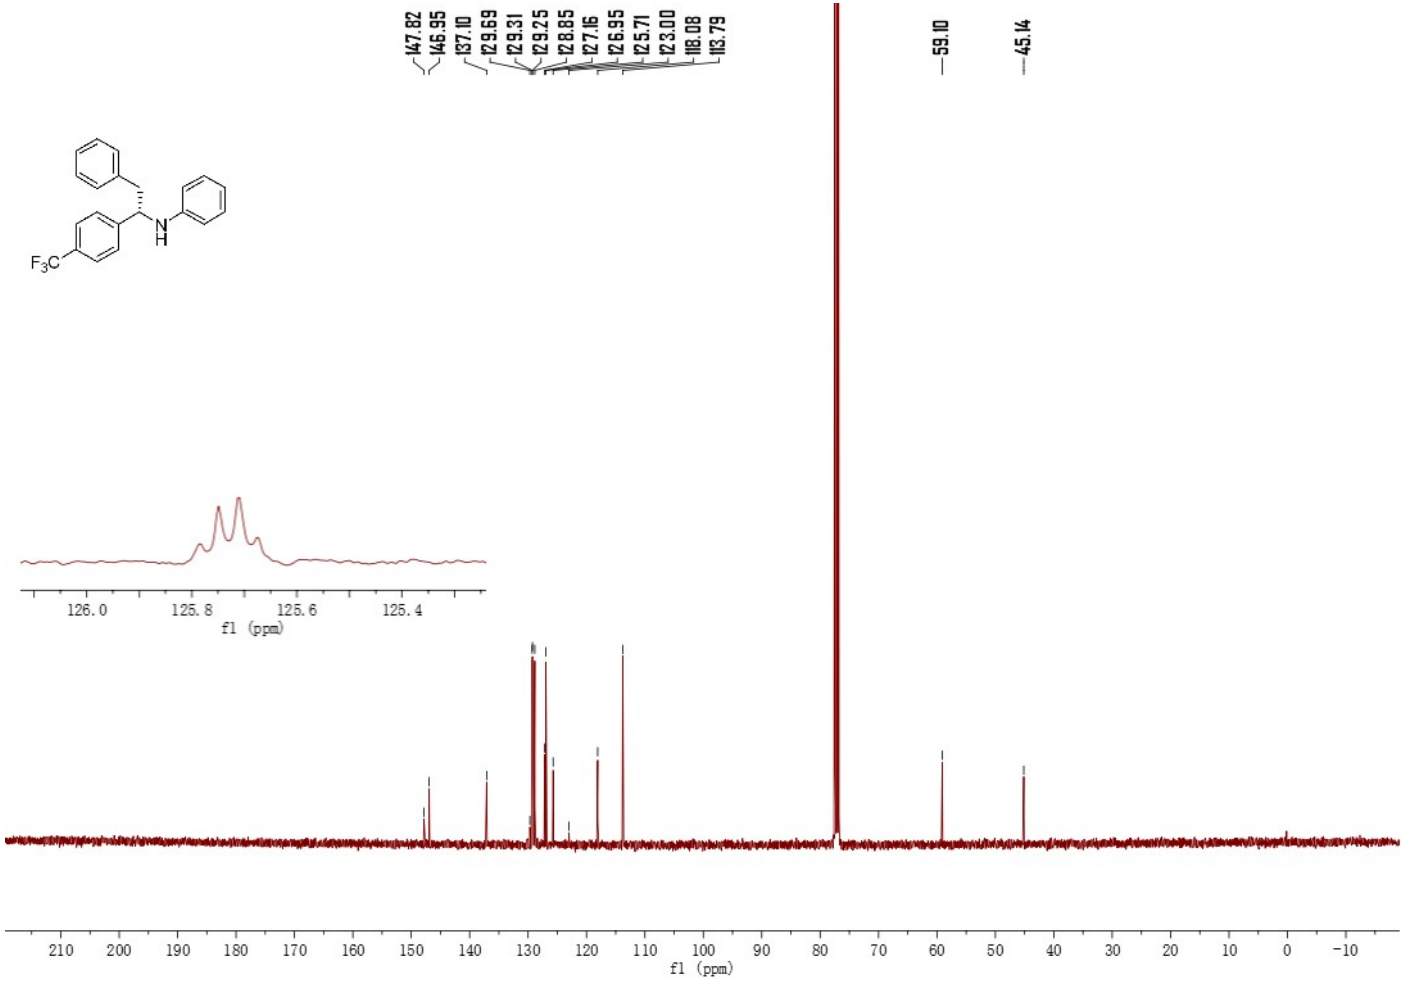

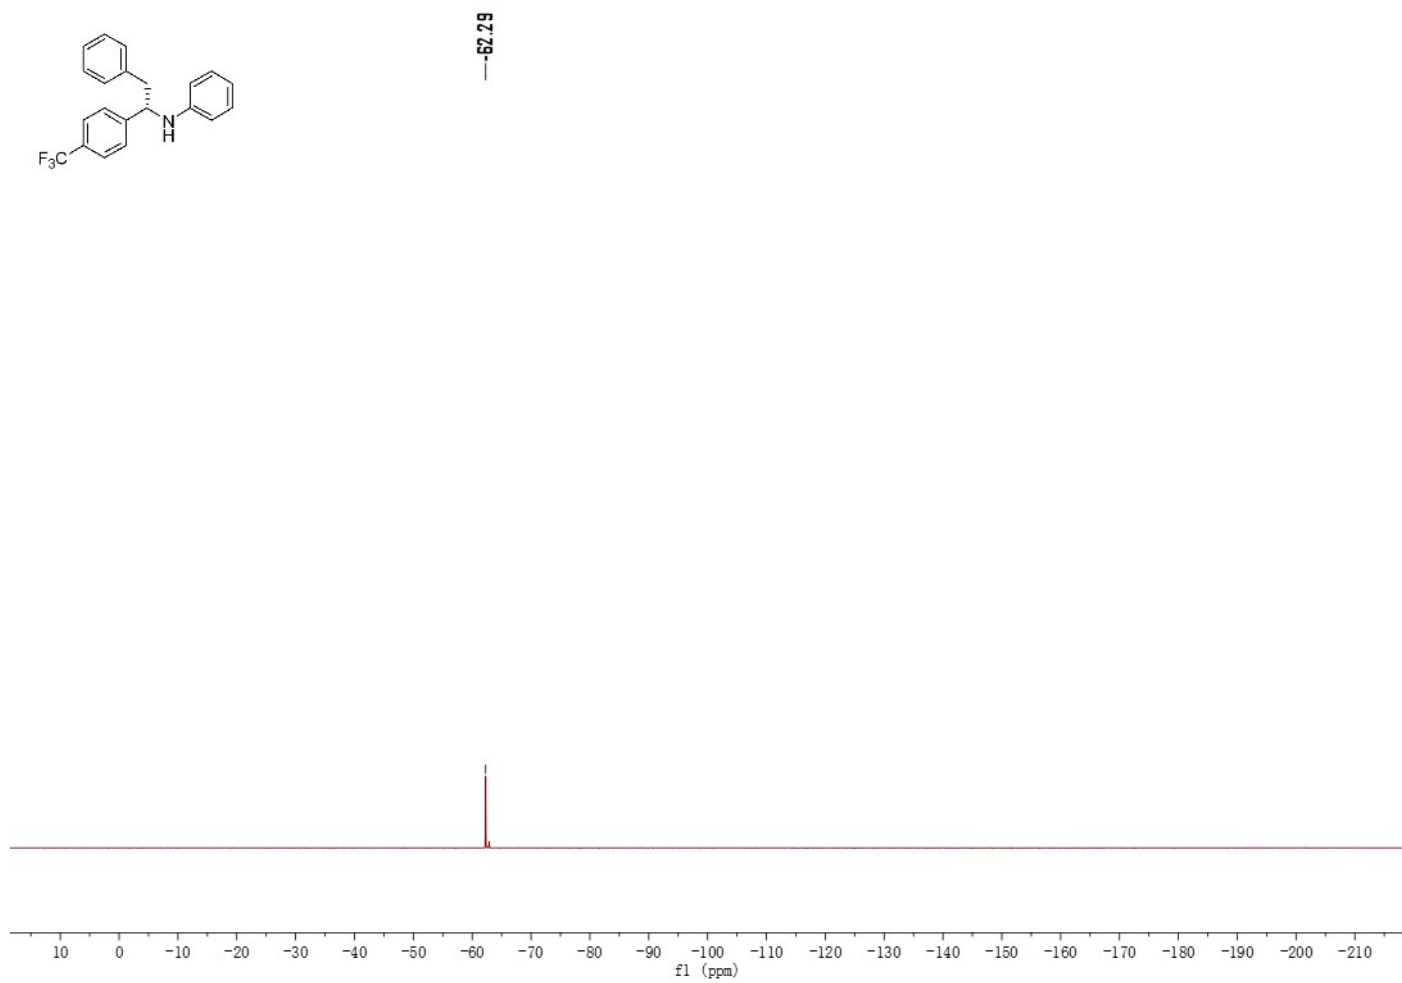

**(S)-N-(2-phenyl-1-(4-(trifluoromethoxy)phenyl)ethyl)aniline (3af)**

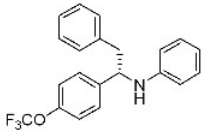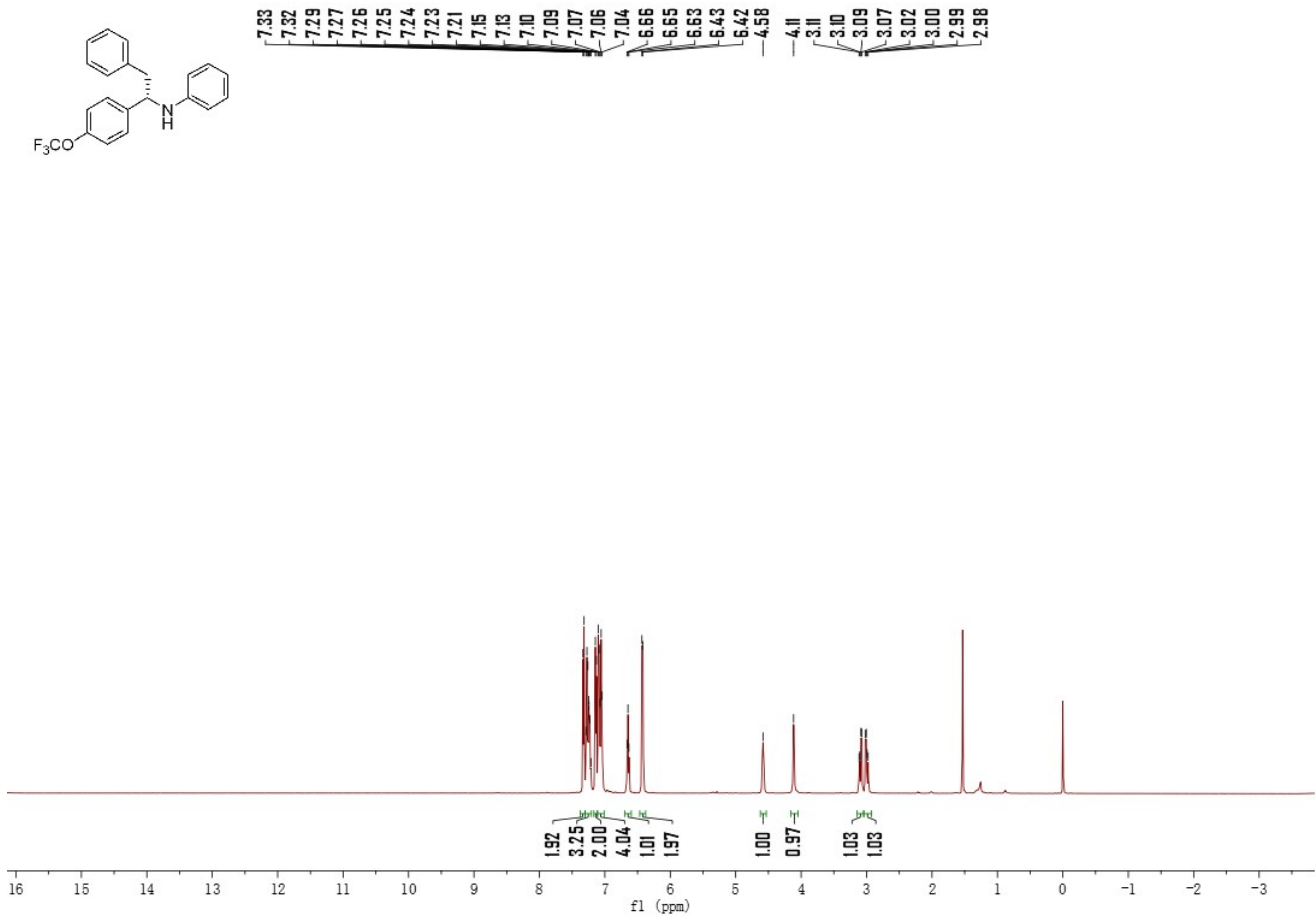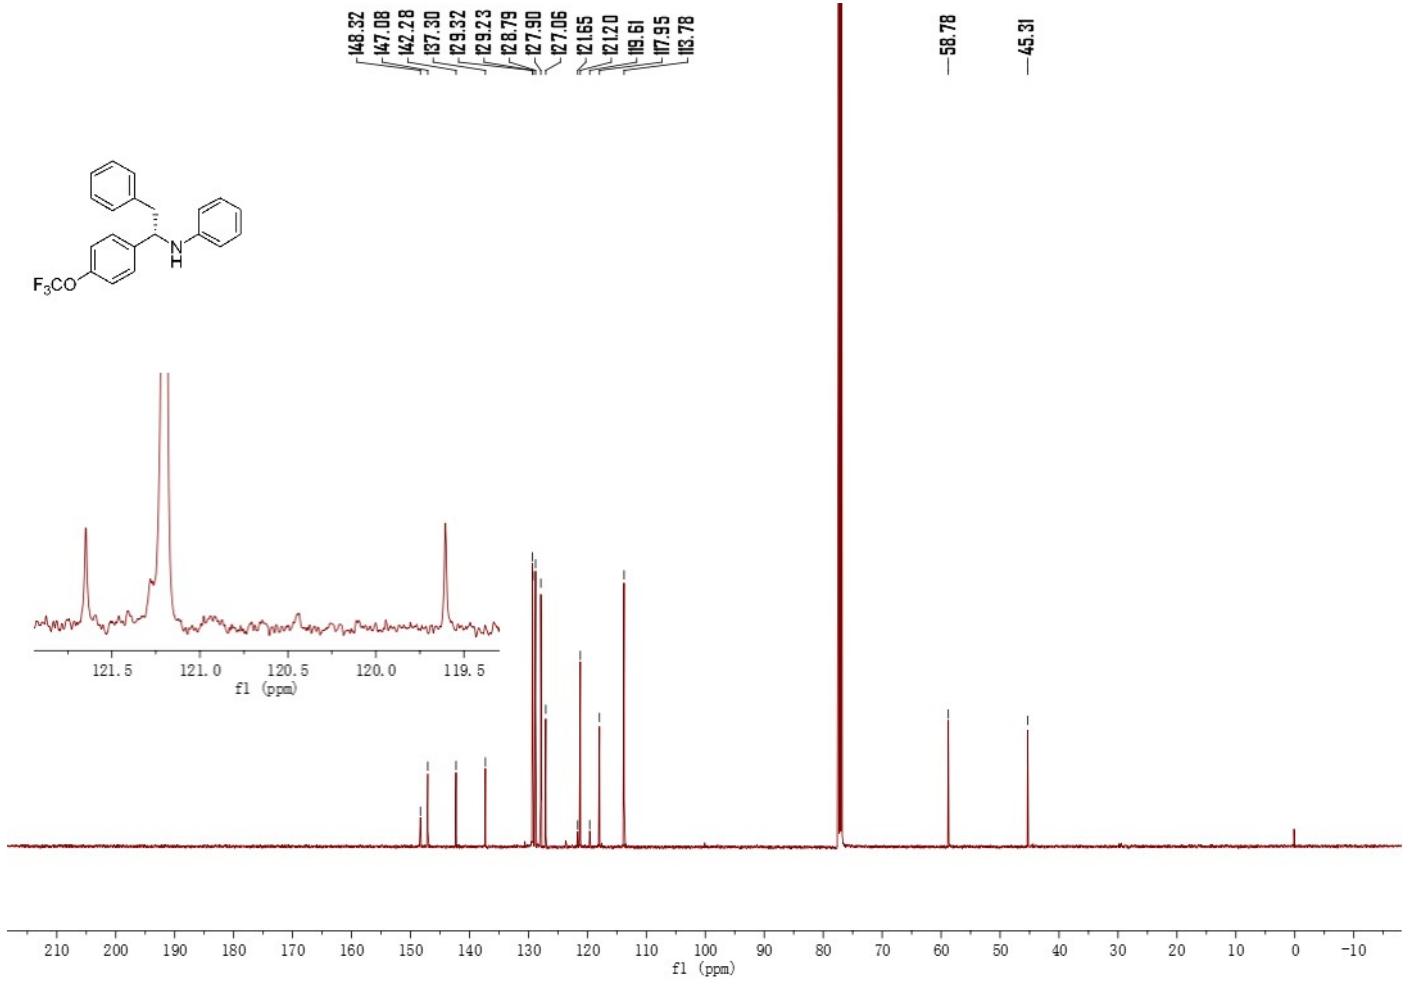

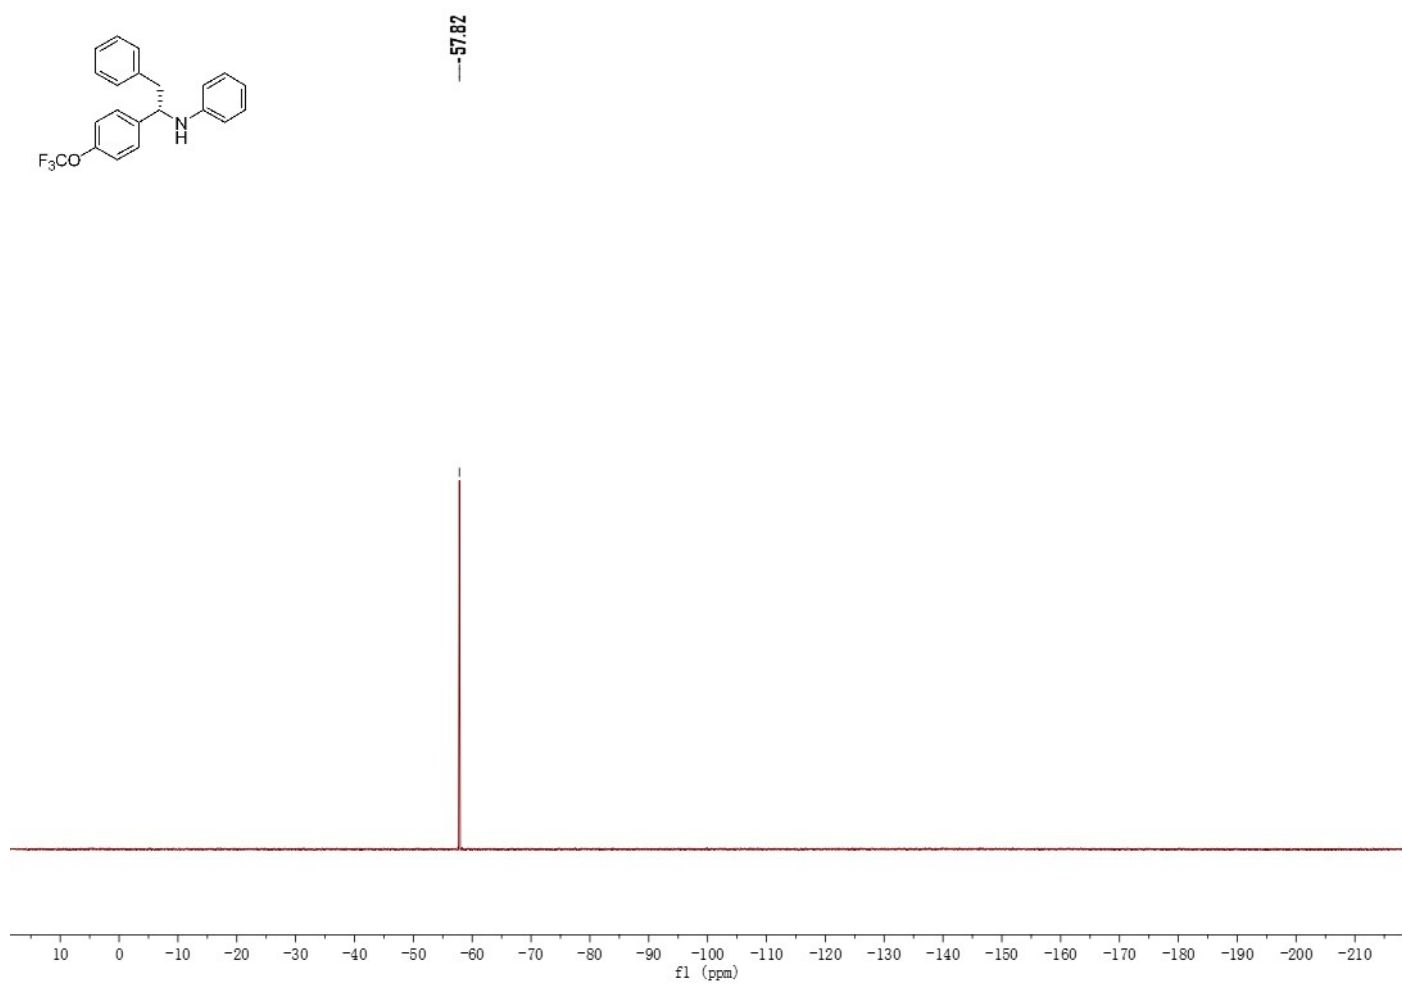

**(S)-N-(1-(4-methoxyphenyl)-2-phenylethyl)aniline (3ag)**



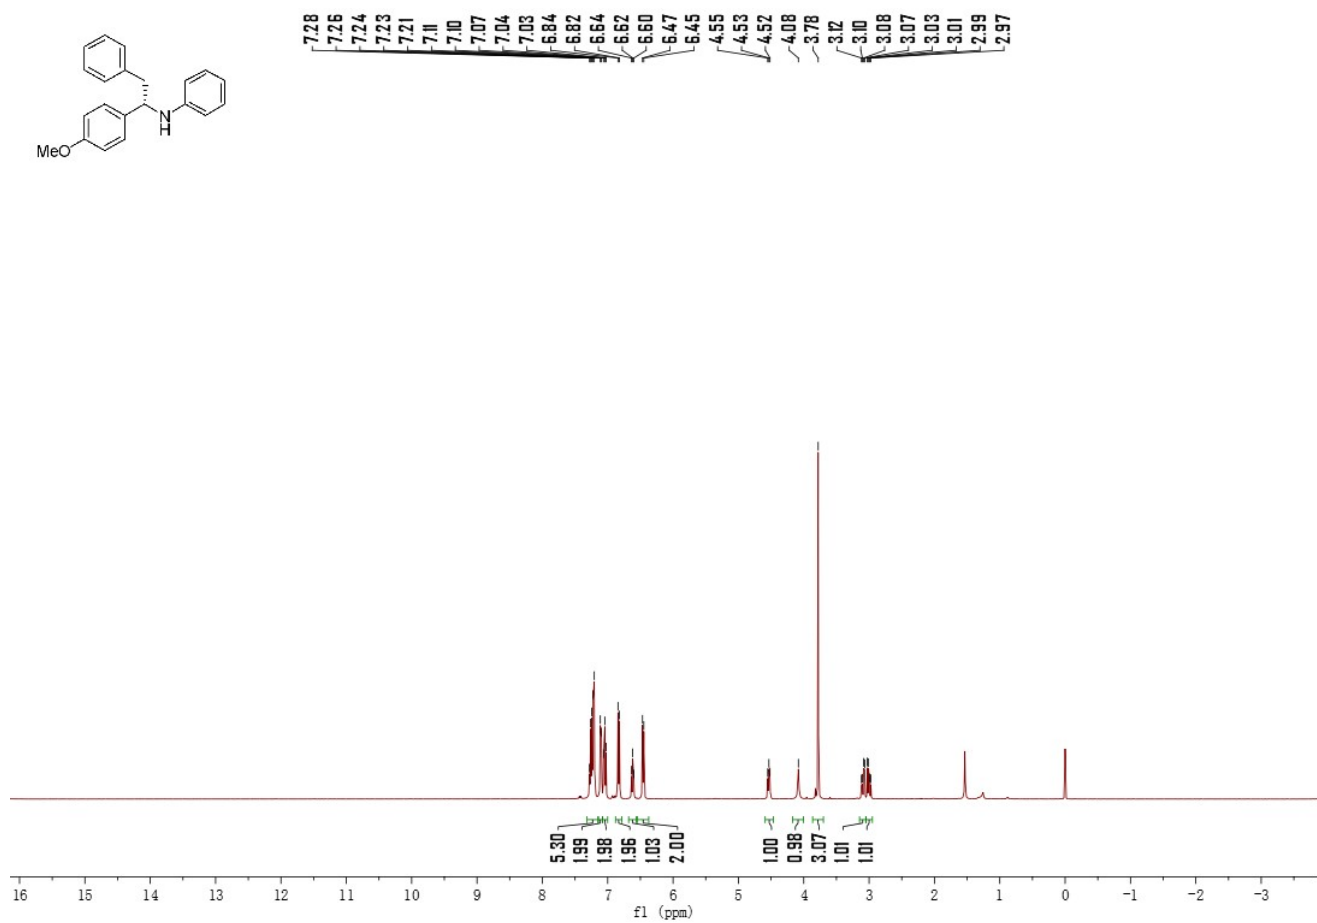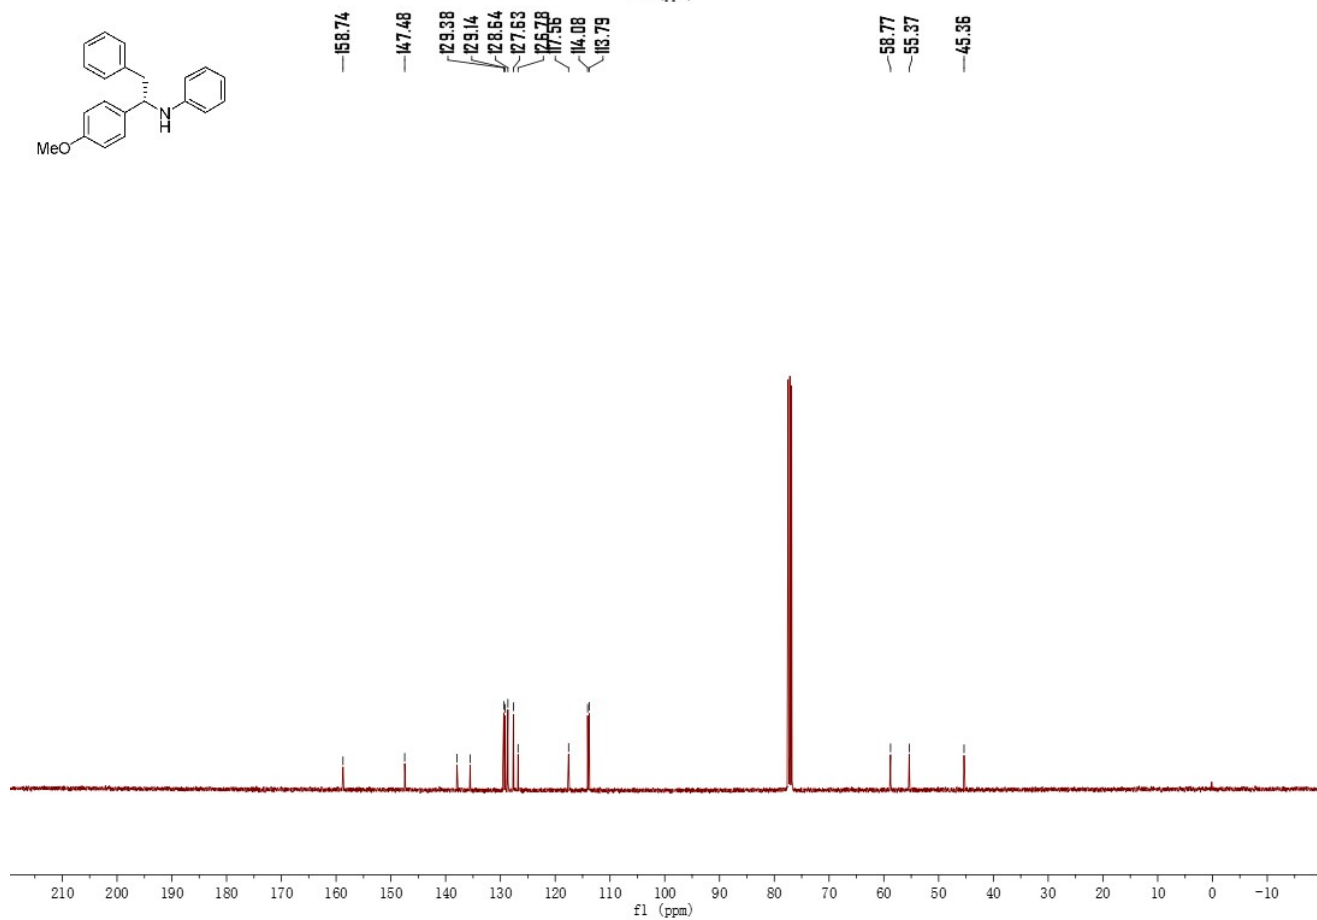

*(S)*-*N*-(2-phenyl-1-(*p*-tolyl)ethyl)aniline (3ah)

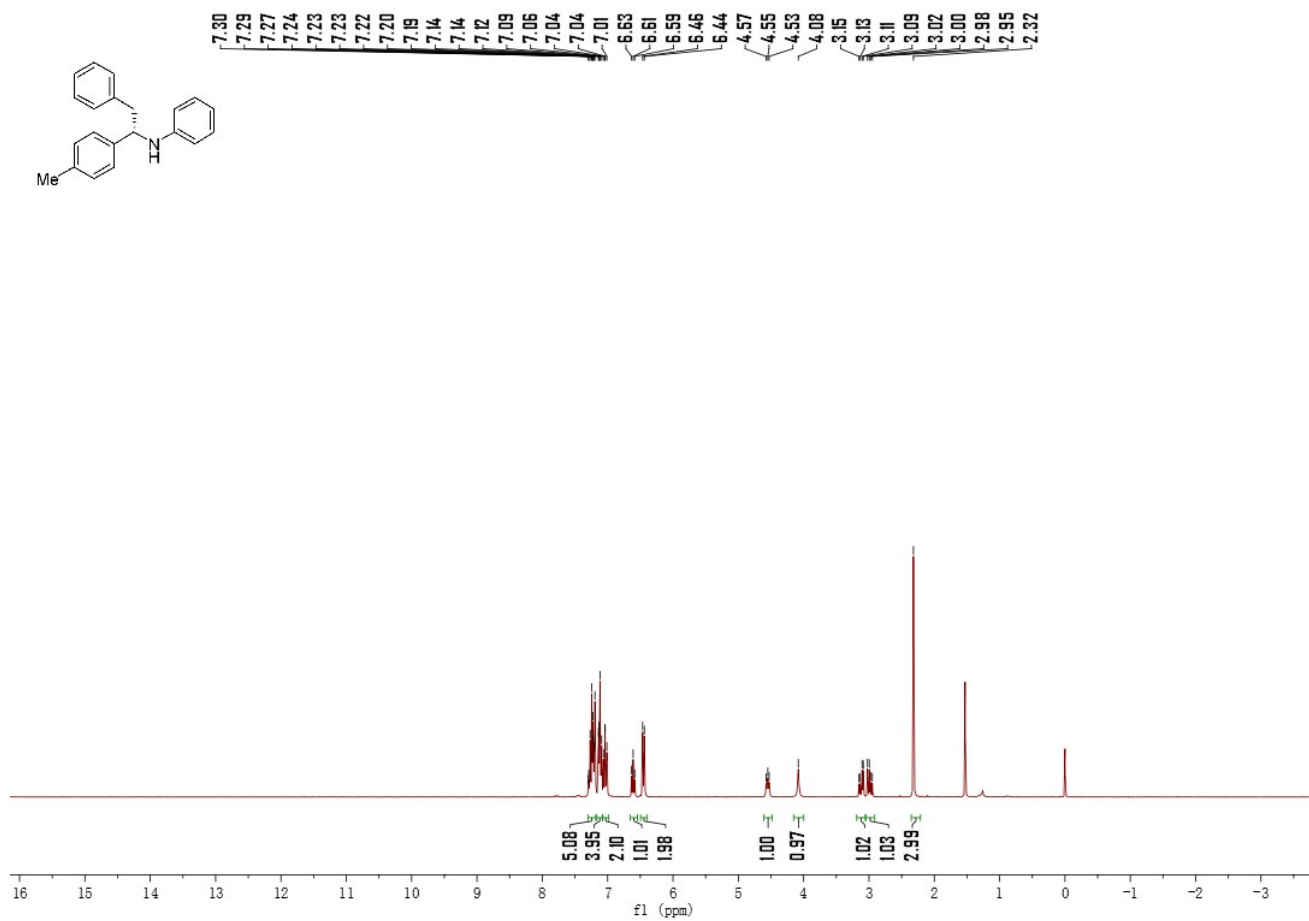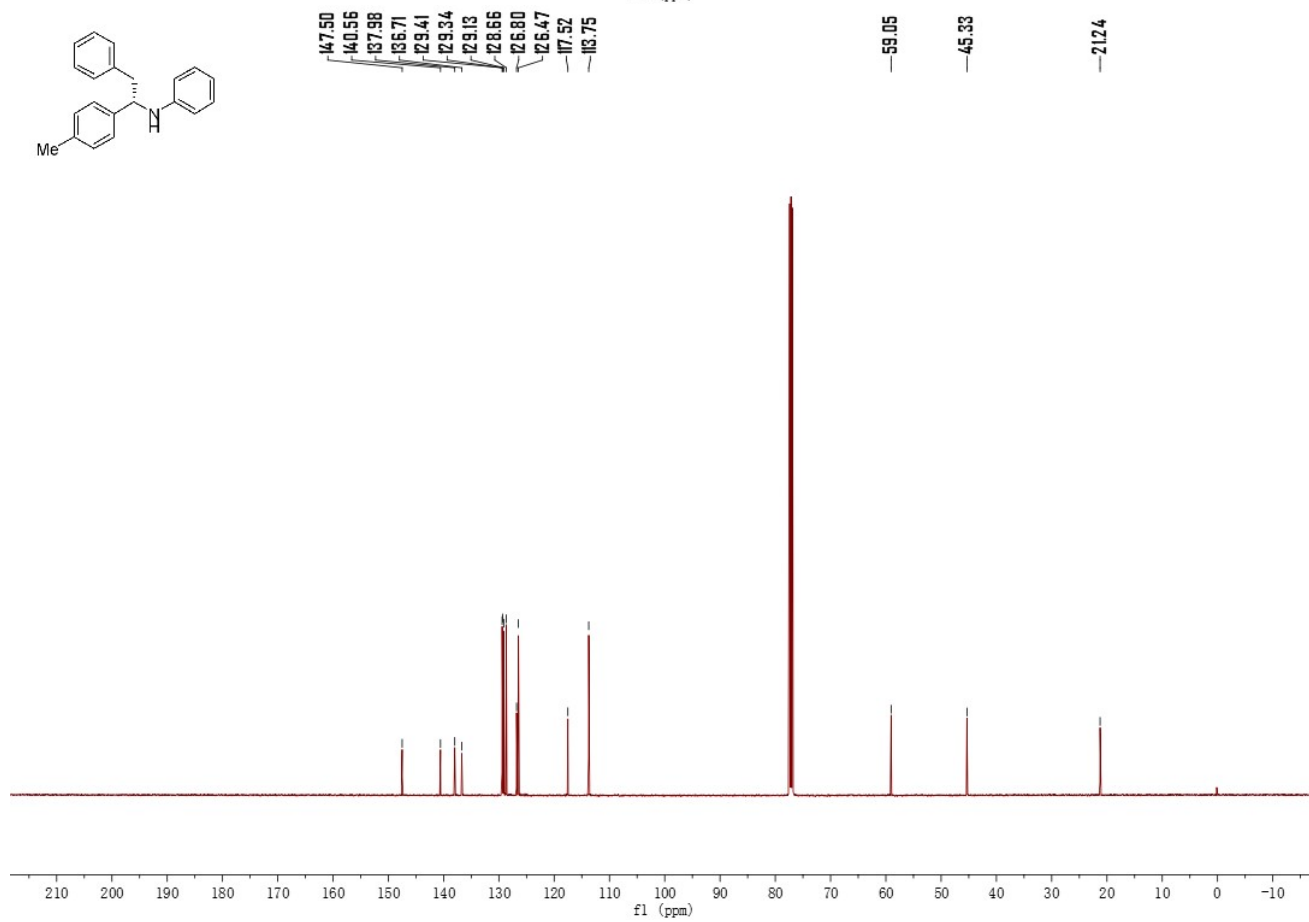

(*S*)-*N*-(2-phenyl-1-(2-(trifluoromethyl)phenyl)ethyl)aniline (3ai)

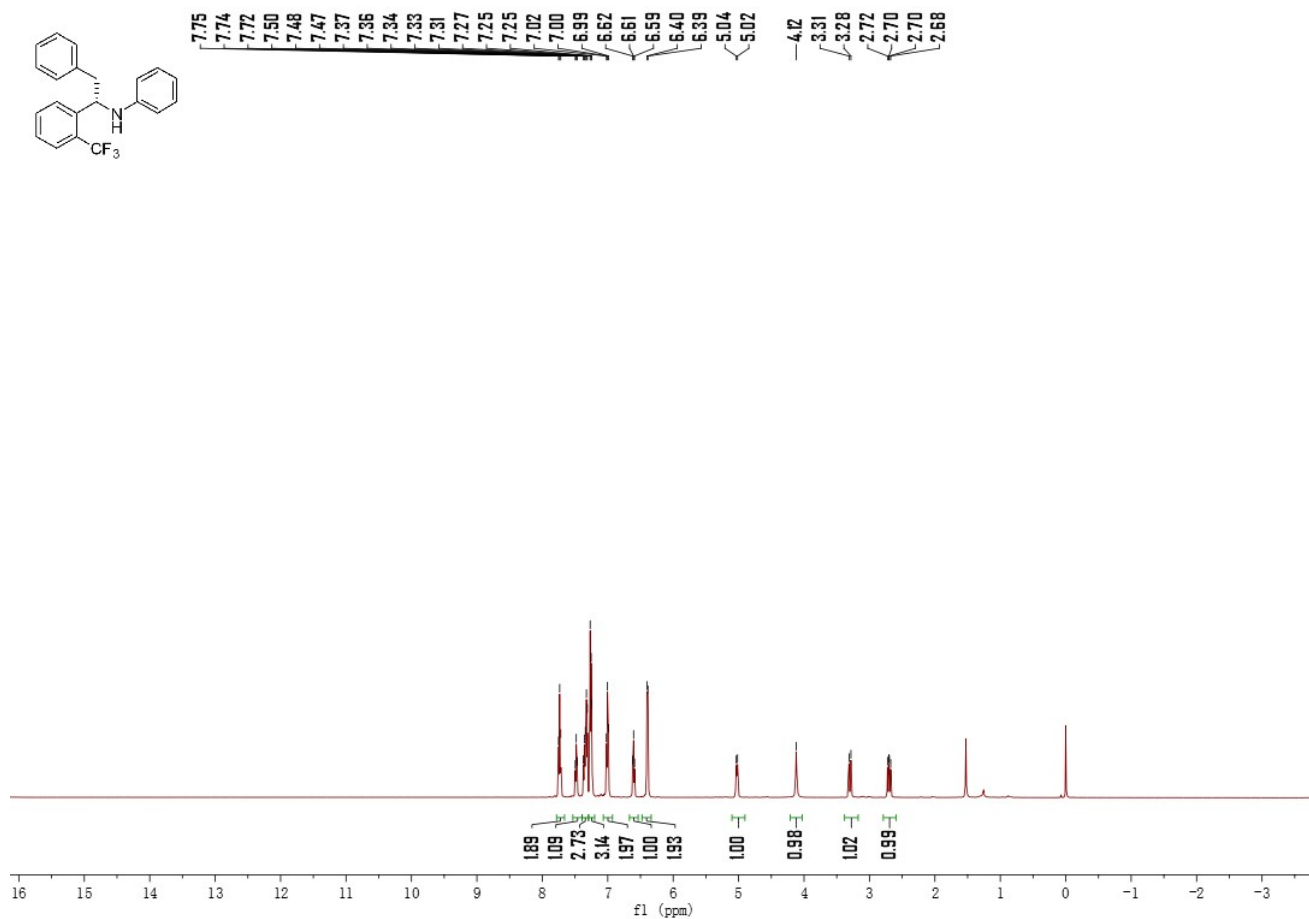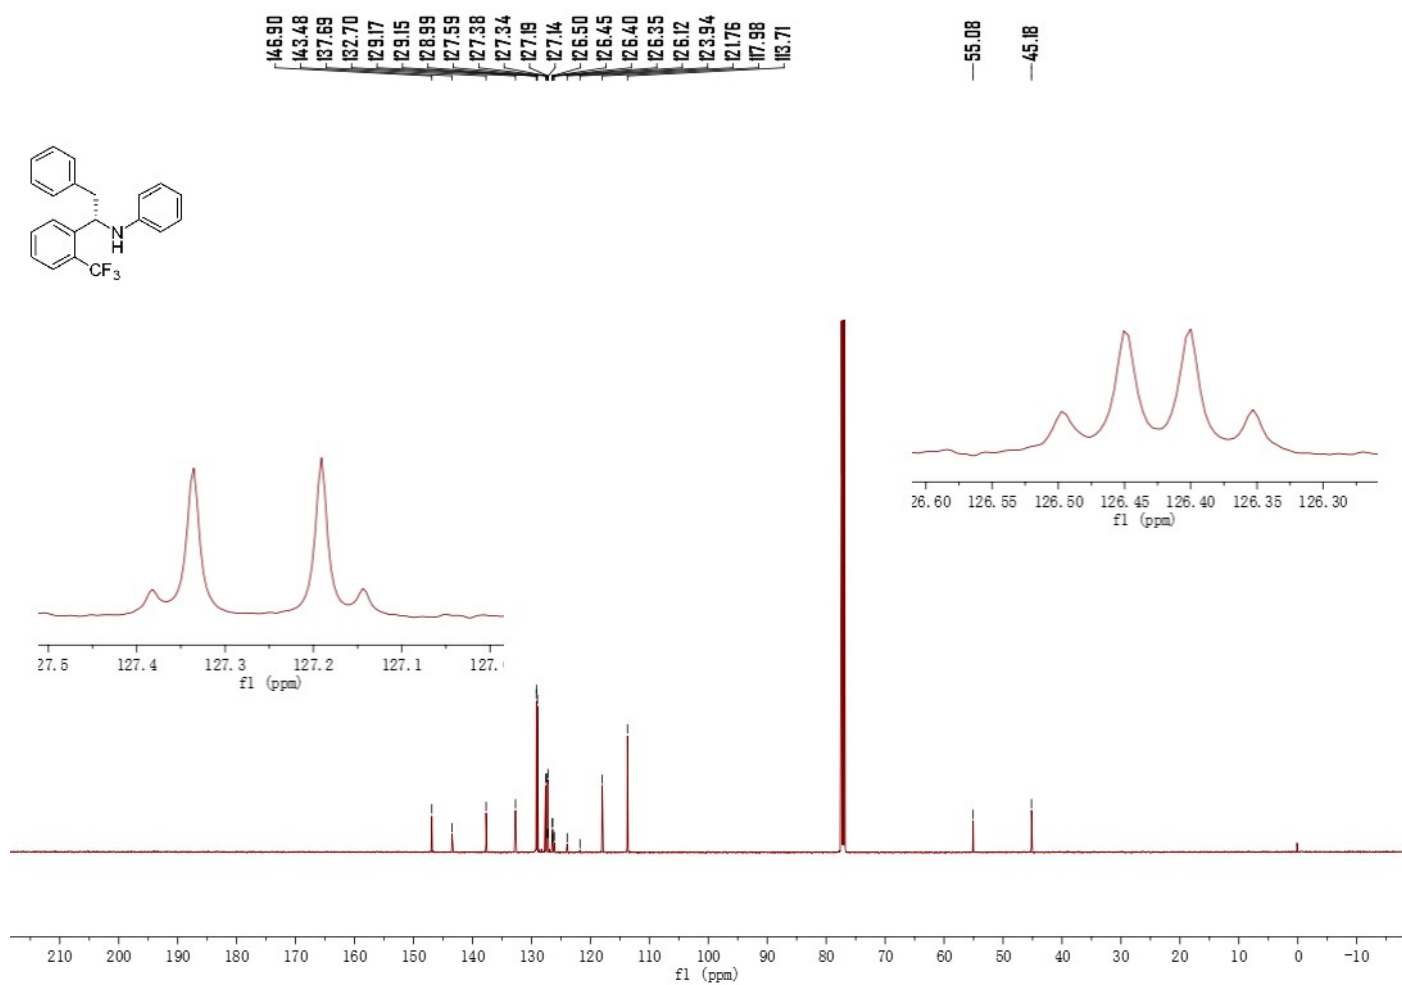

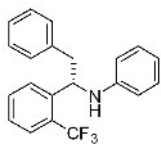

58.05

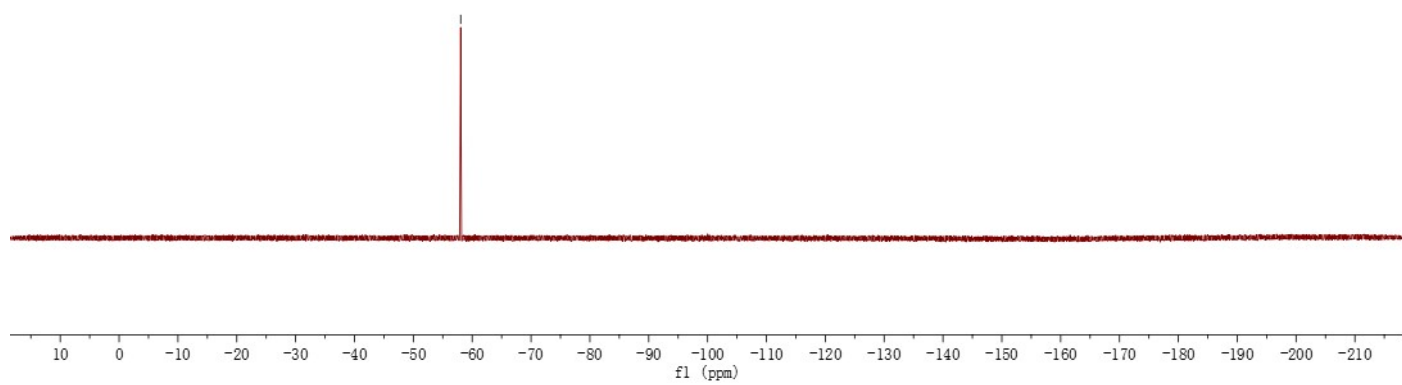

**(S)-N-(1-(3-fluorophenyl)-2-phenylethyl)aniline (3aj)**

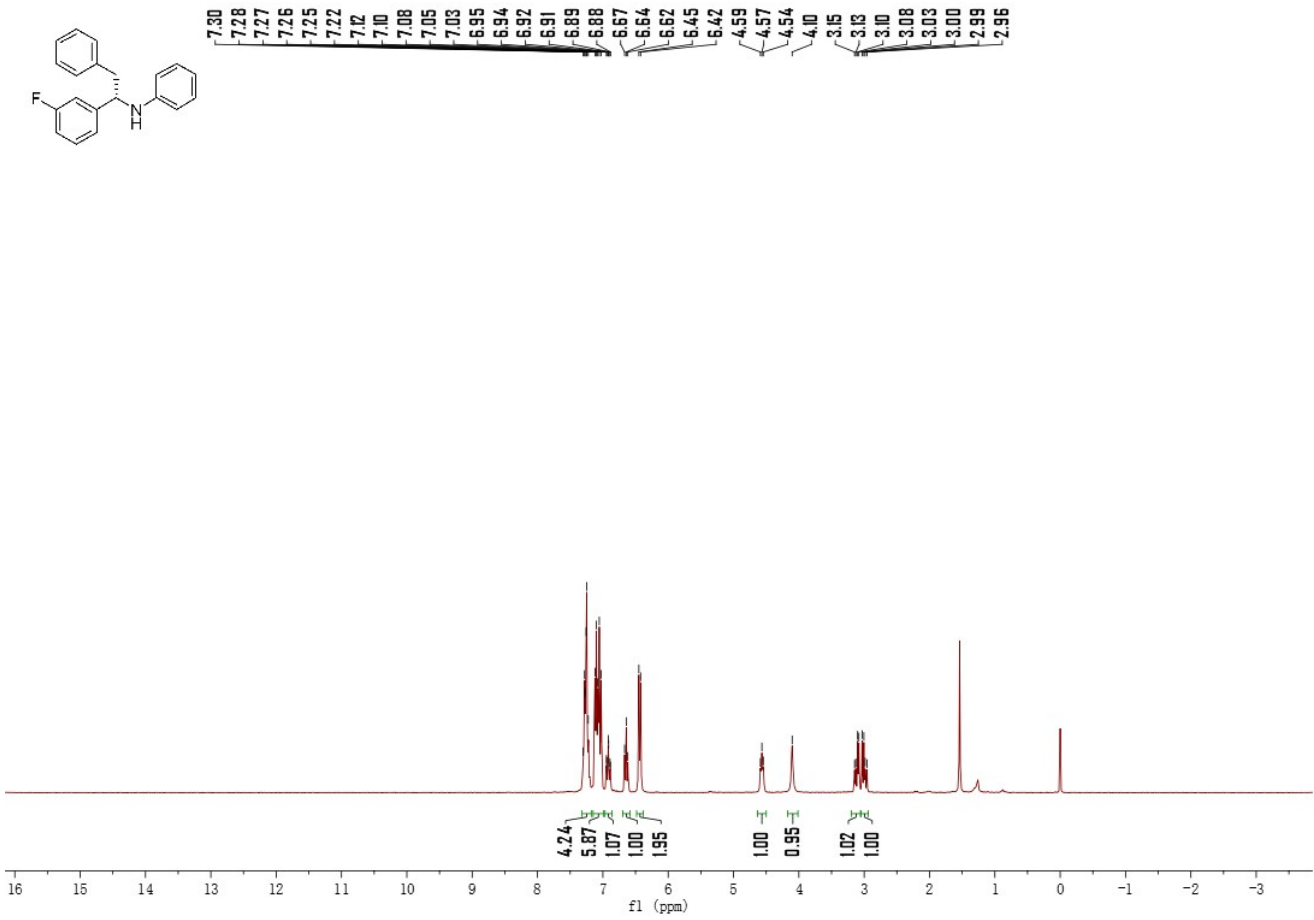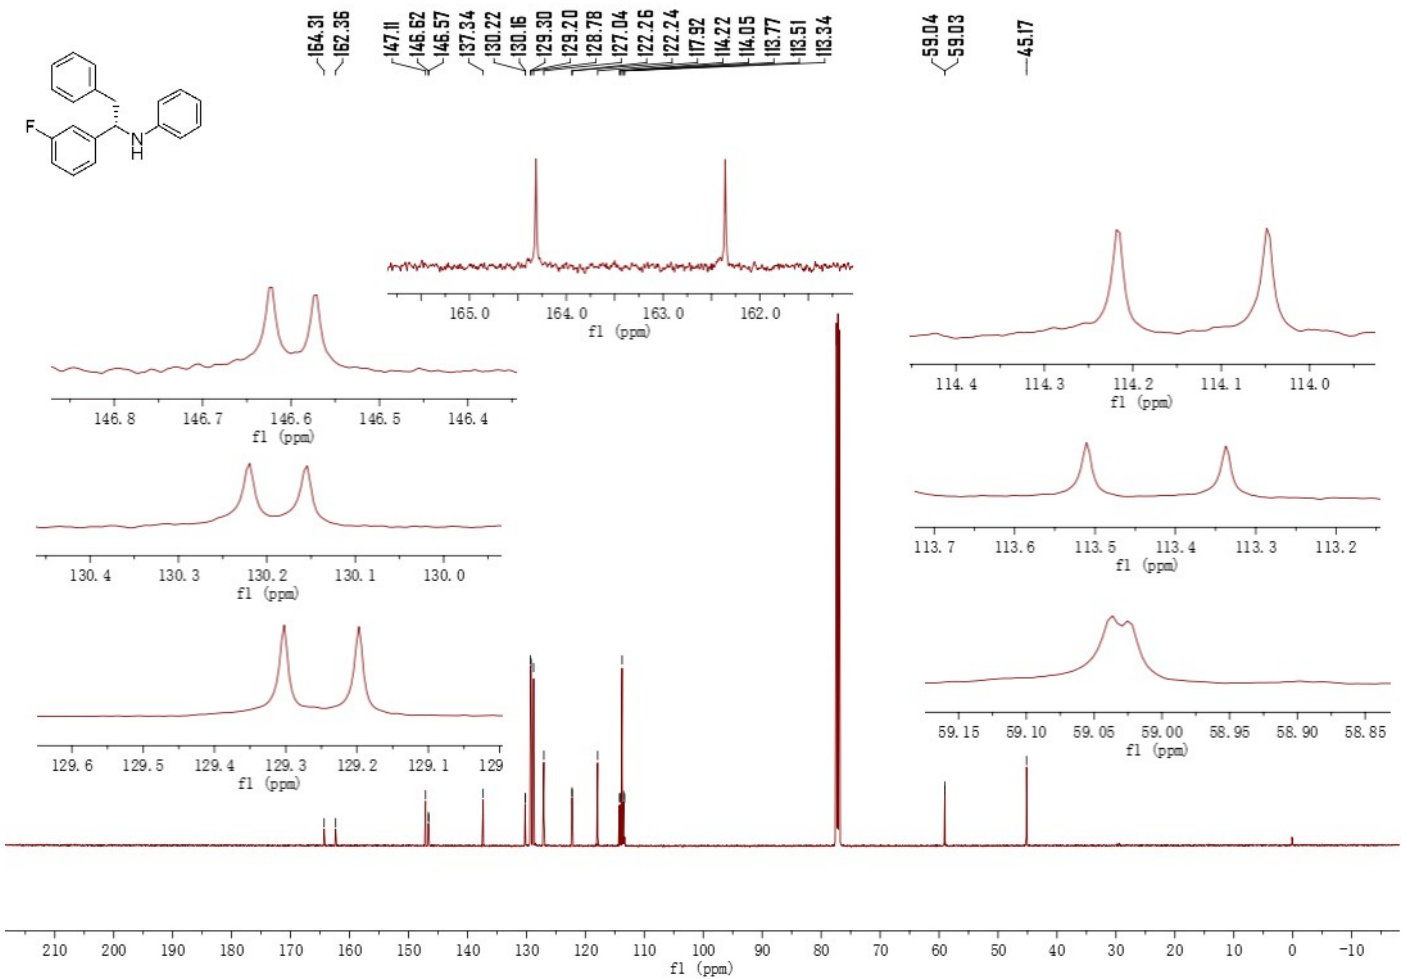

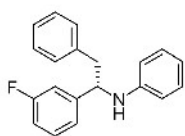

-112.88

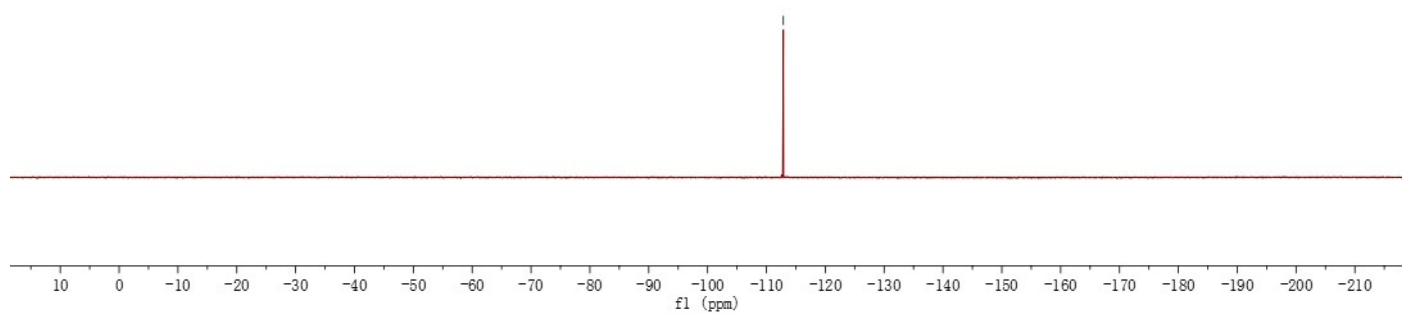

**(S)-N-(1-(3-bromophenyl)-2-phenylethyl)aniline (3ak)**

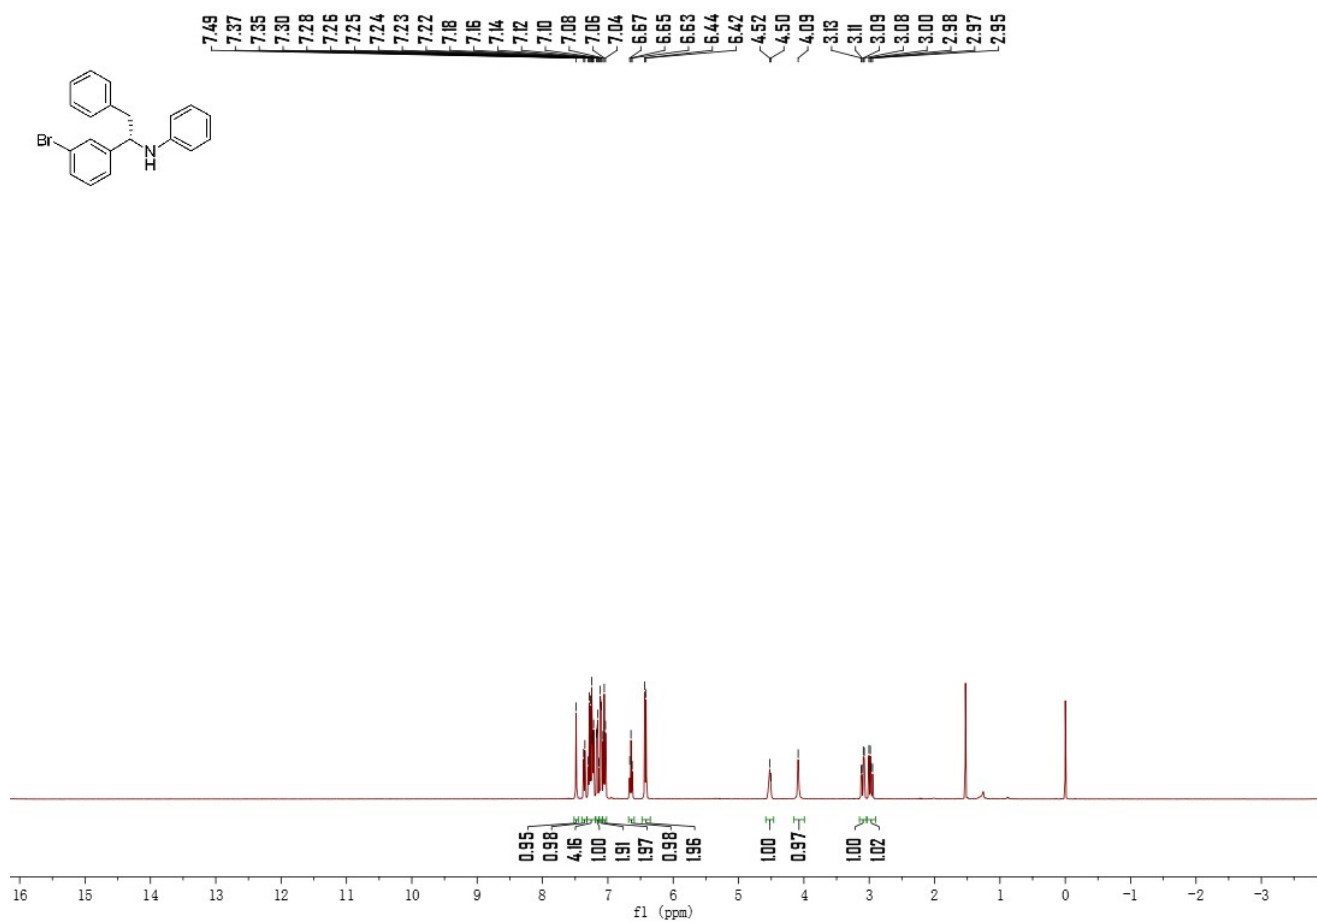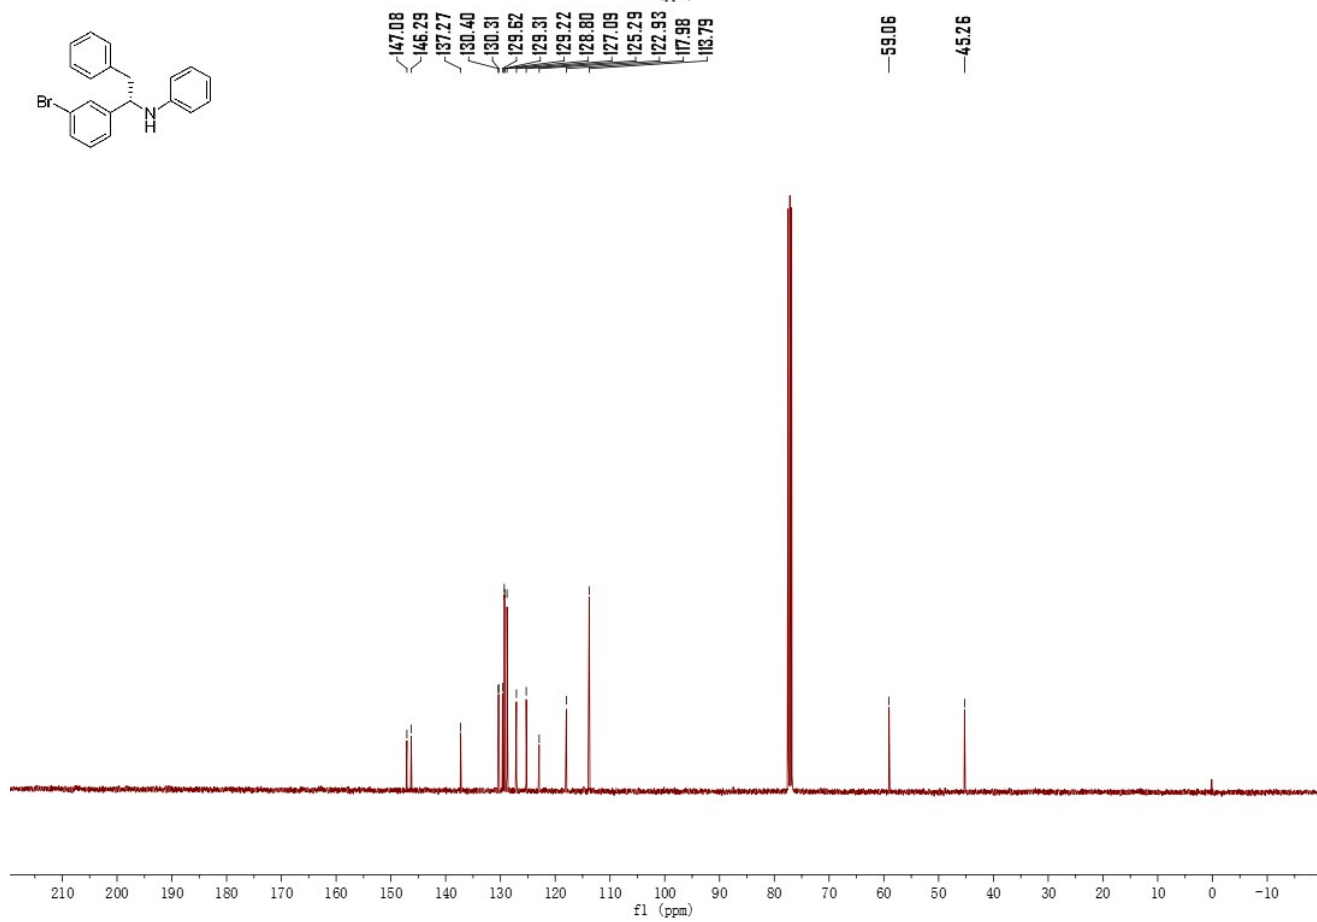

(S)-N-(1-(3-chloro-4-fluorophenyl)-2-phenylethyl)aniline (3a)

7.37  
7.36  
7.34  
7.34  
7.28  
7.26  
7.25  
7.23  
7.23  
7.18  
7.12  
7.12  
7.11  
7.09  
7.09  
7.07  
7.06  
7.06  
7.04  
7.01  
6.68  
6.66  
6.63  
6.43  
6.40  
4.53  
4.51  
4.49  
4.09  
3.09  
3.07  
3.05  
3.03  
3.01  
2.99  
2.97  
2.94

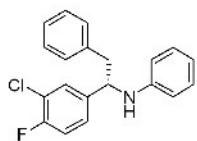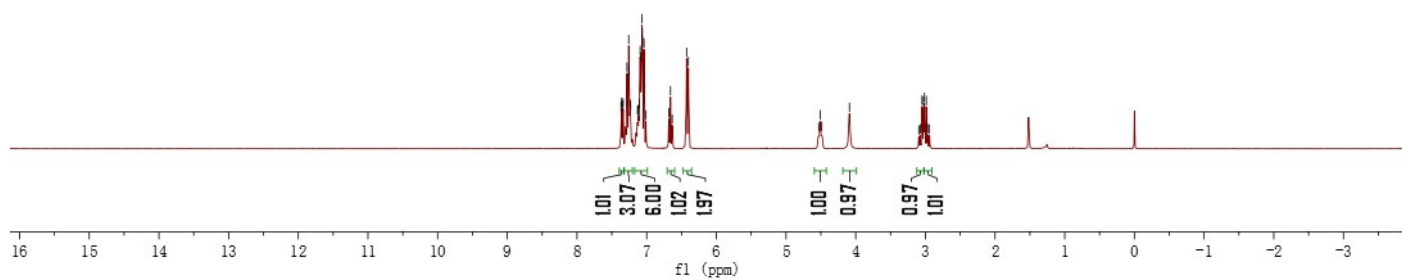

158.21  
156.24  
146.90  
140.76  
140.73  
137.02  
129.31  
129.25  
128.83  
128.61  
127.16  
126.26  
126.21  
121.30  
121.16  
118.12  
116.81  
116.64  
113.80  
58.60  
45.29

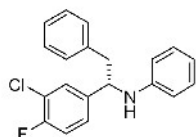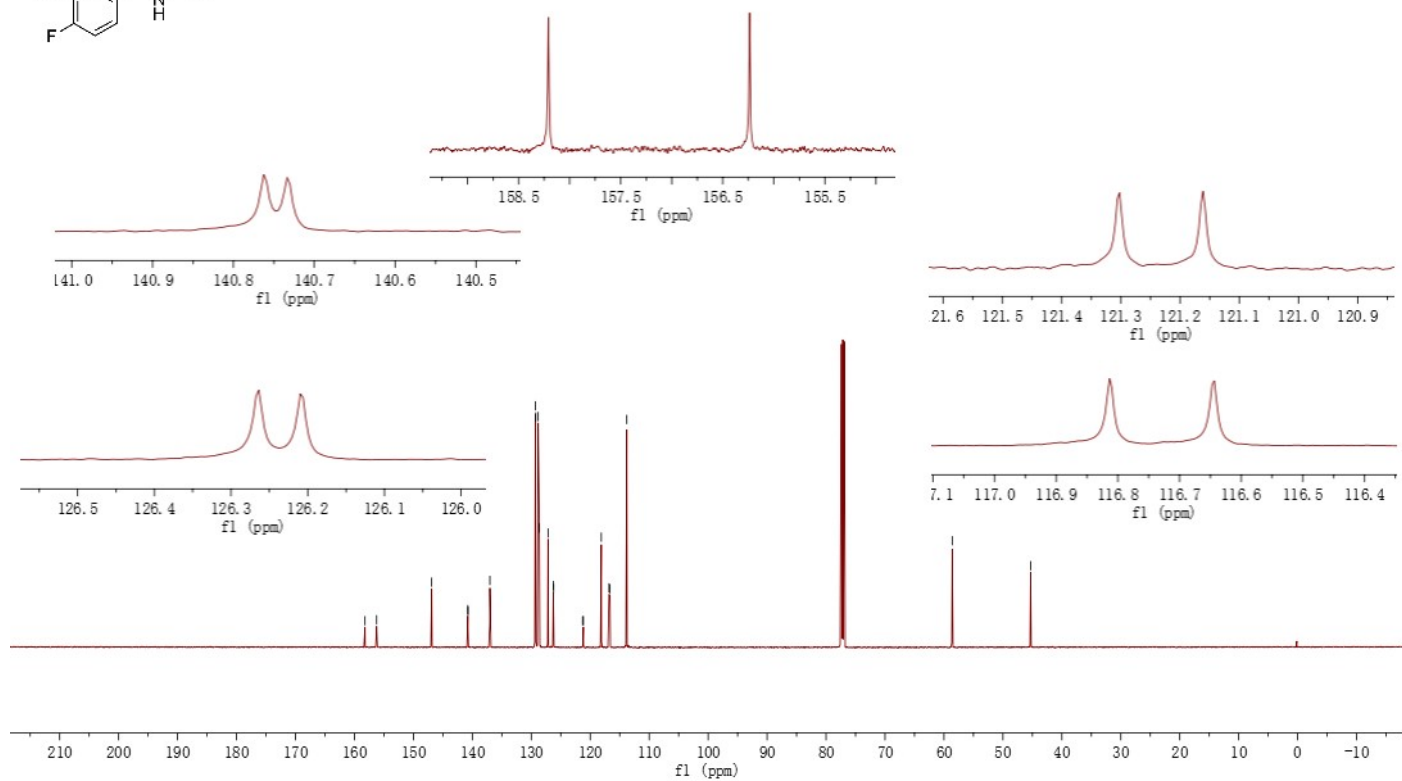



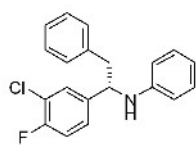

-117.87

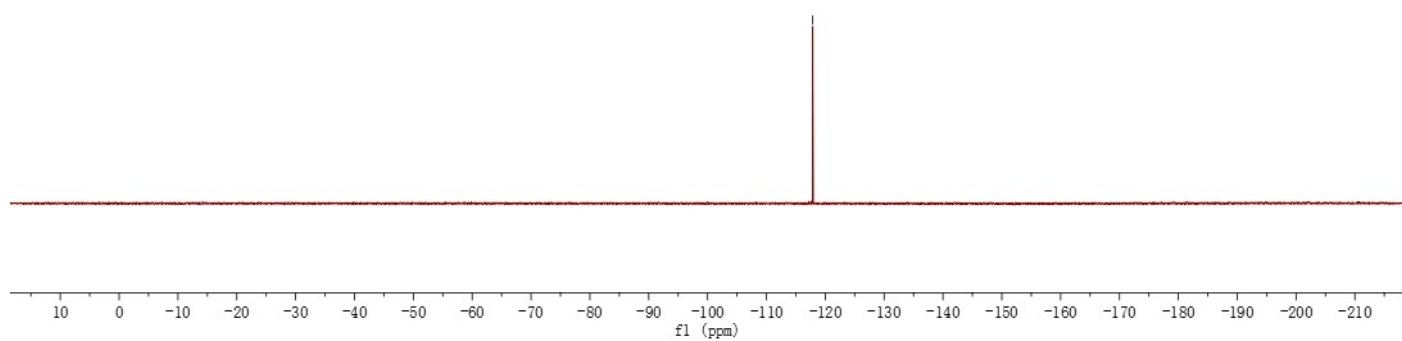

**(S)-N-(1-(naphthalen-2-yl)-2-phenylethyl)aniline (3am)**

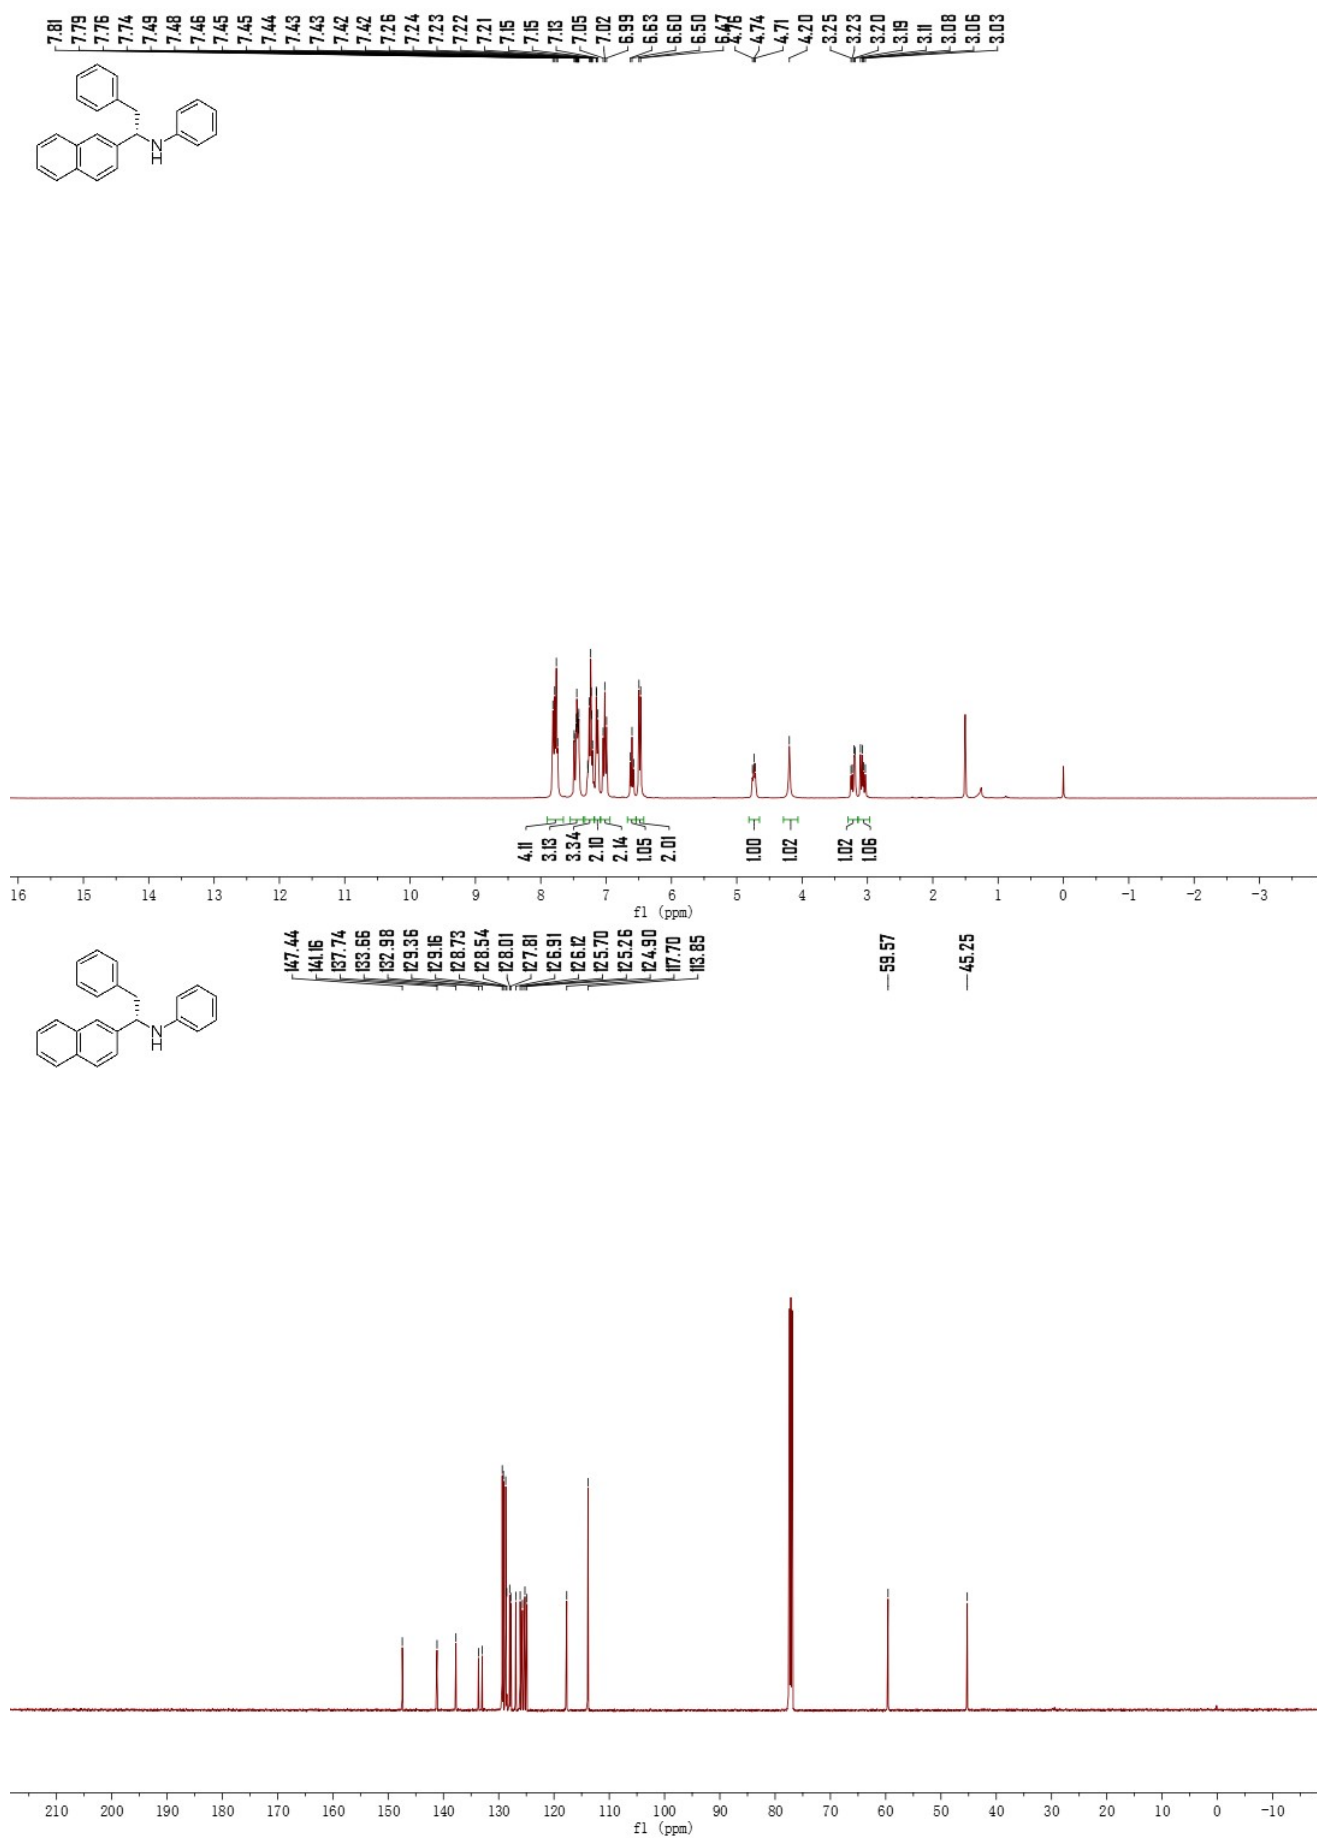

(*S*)-*N*-(2-phenyl-1-(thiophen-2-yl)ethyl)aniline (3a)

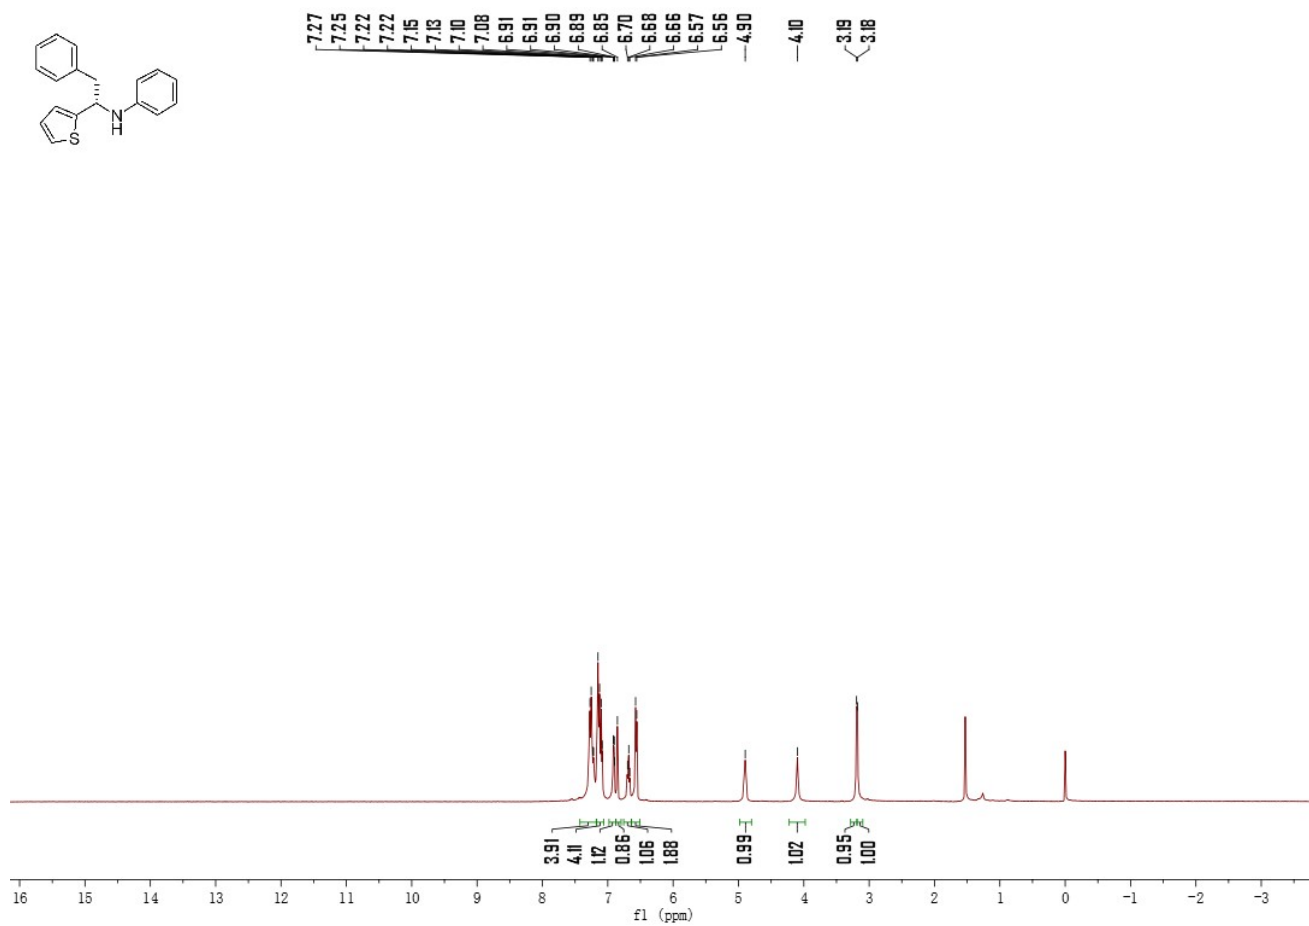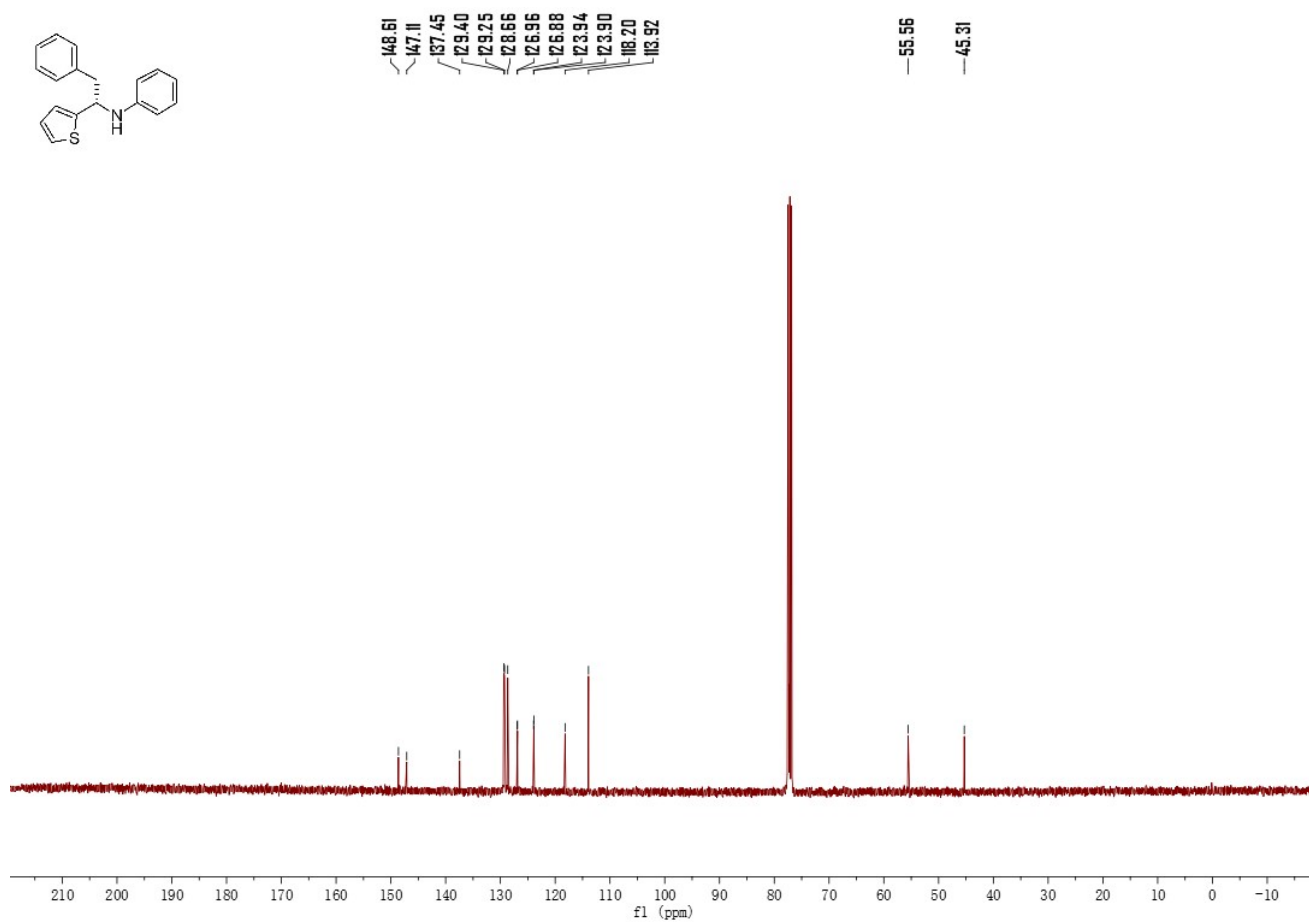

(*S*)-*N*-(2-phenyl-1-(thiophen-3-yl)ethyl)aniline (3a)

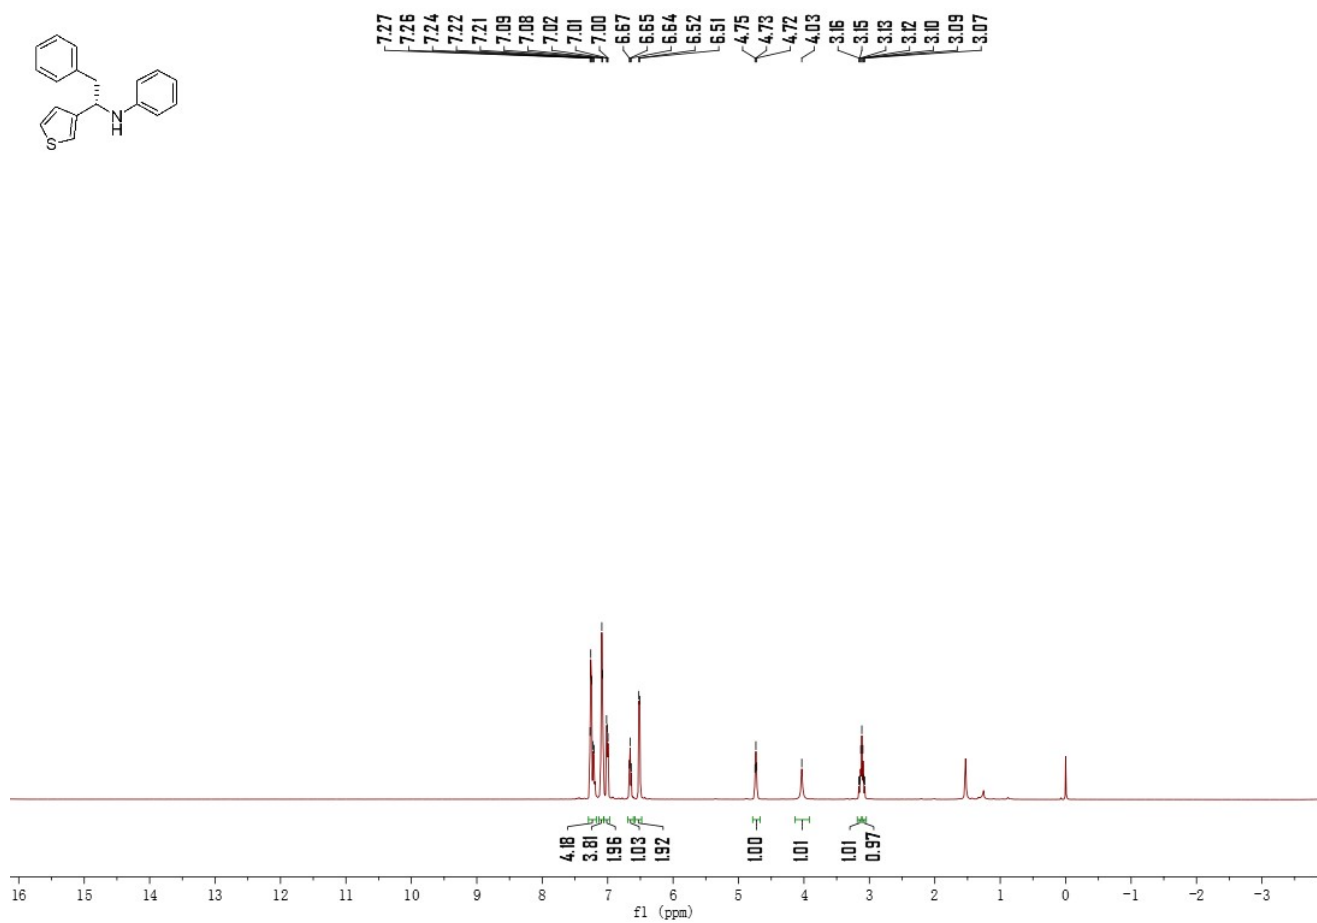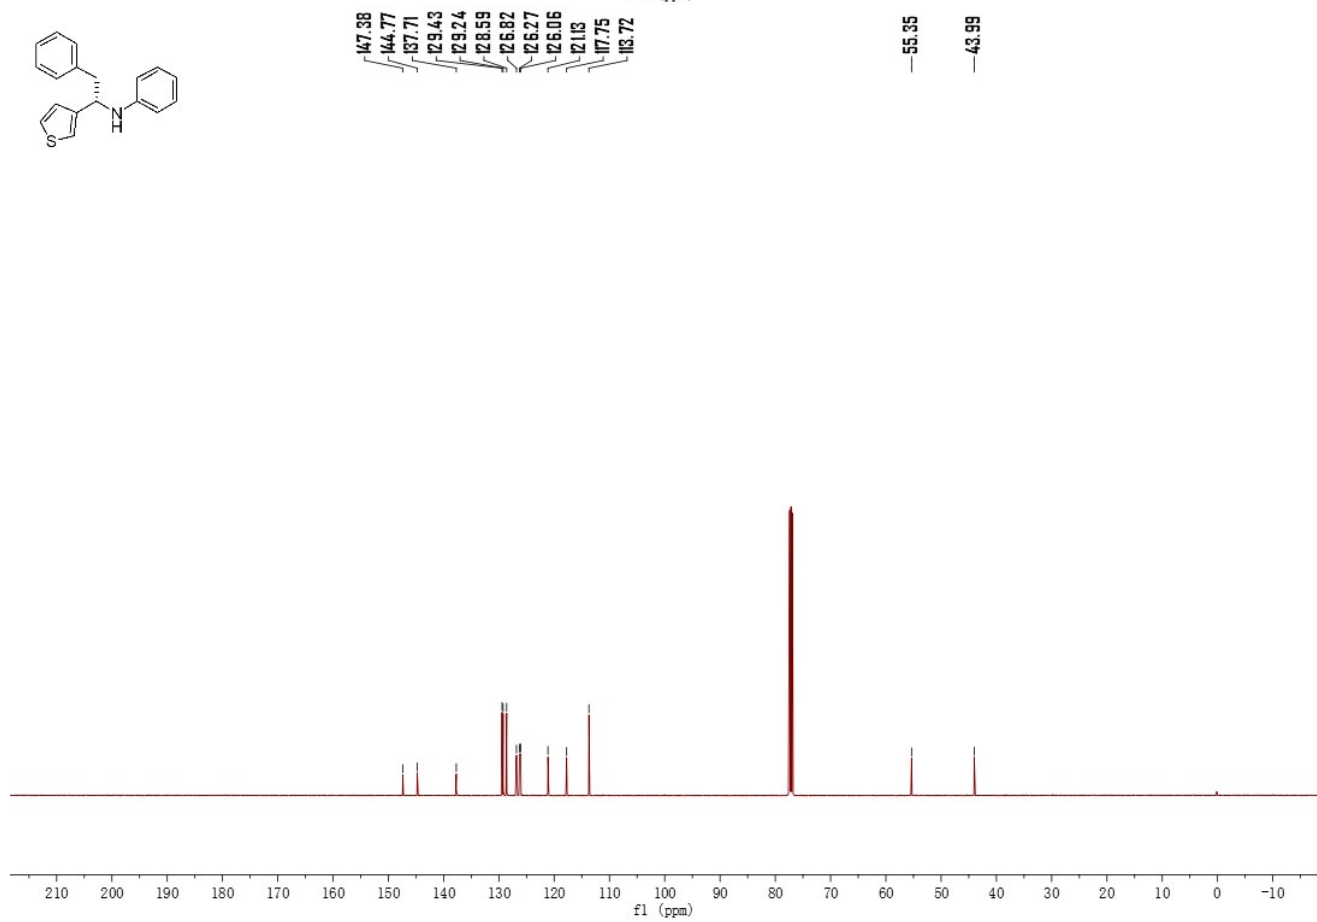

**(S)-N-(1-(furan-2-yl)-2-phenylethyl)aniline (3ap)**

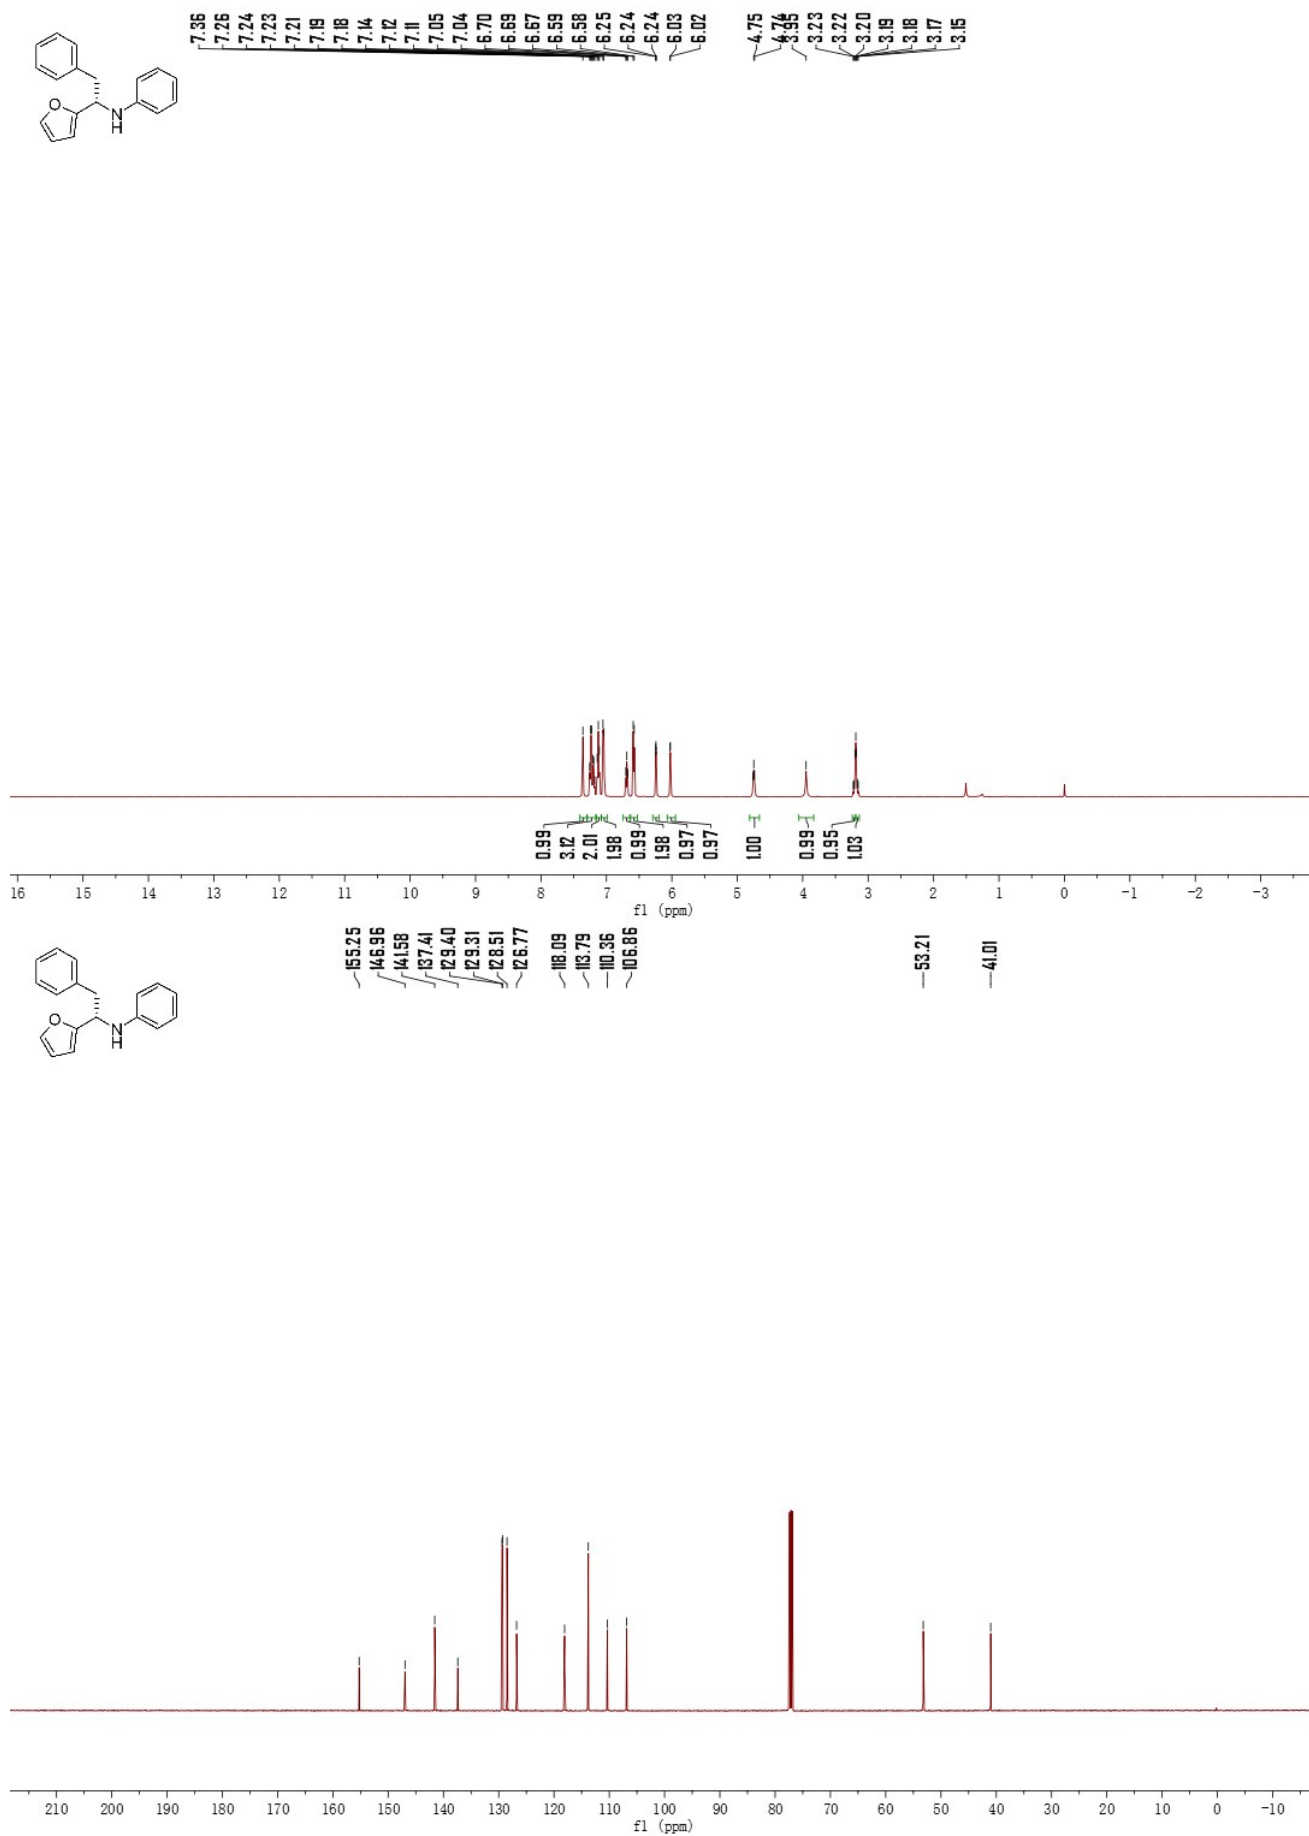

*(S)*-*N*-(1-(furan-3-yl)-2-phenylethyl)aniline (3aq)

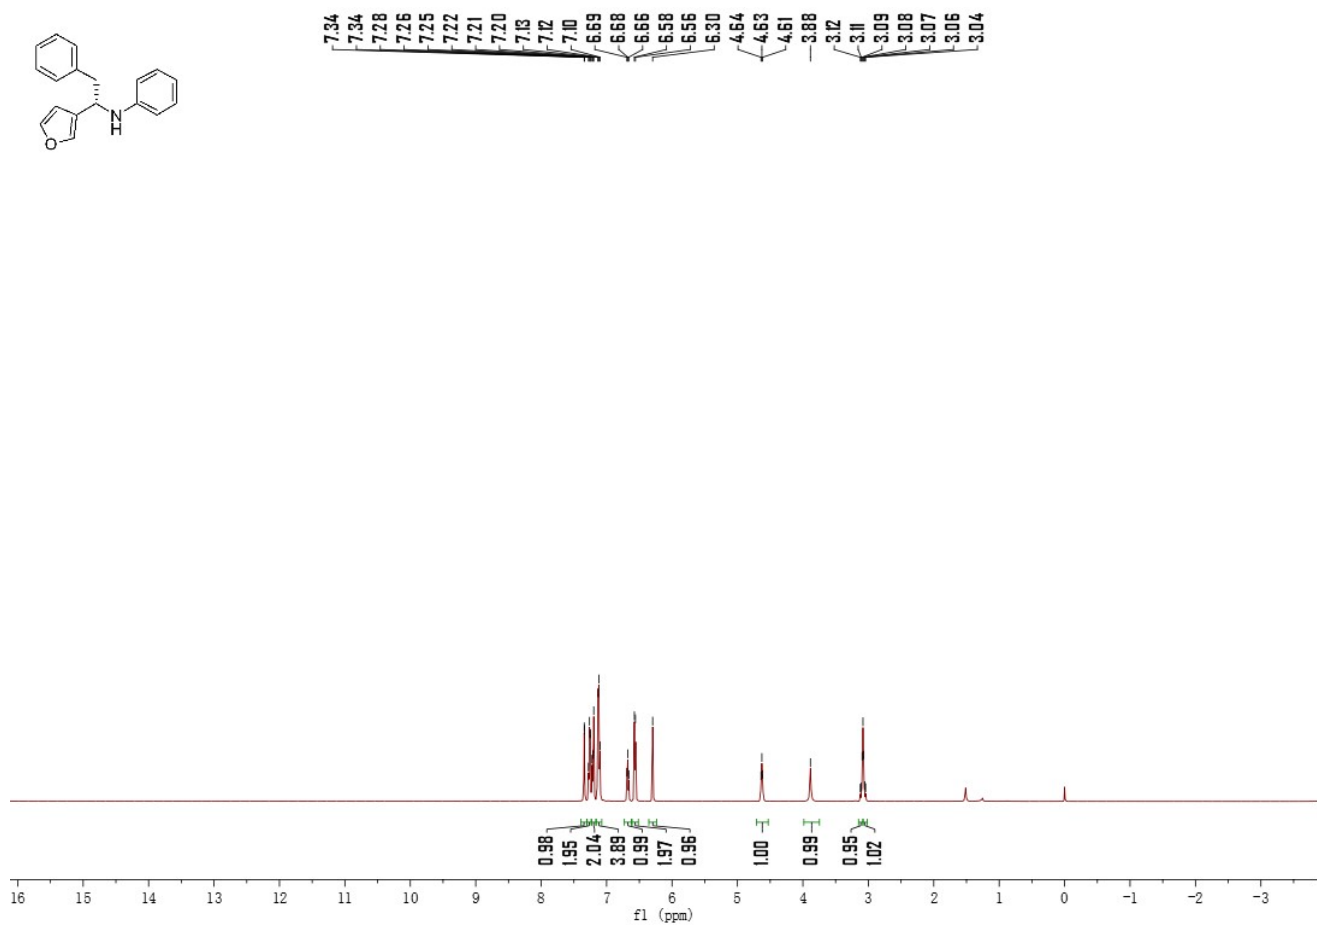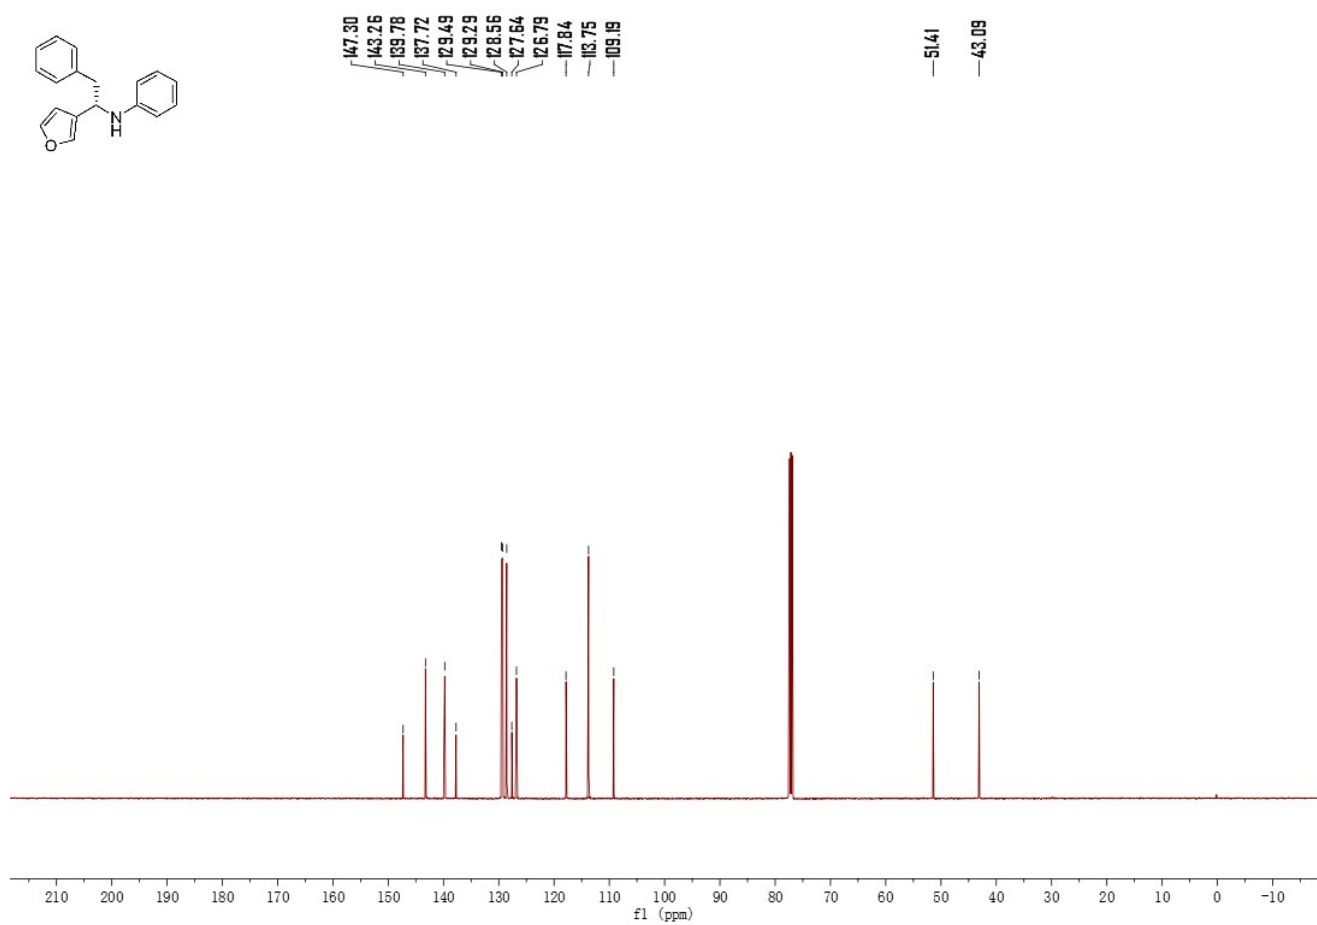

**(S)-N-(1-([1,1'-biphenyl]-4-yl)-2-phenylethyl)aniline (3ar)**

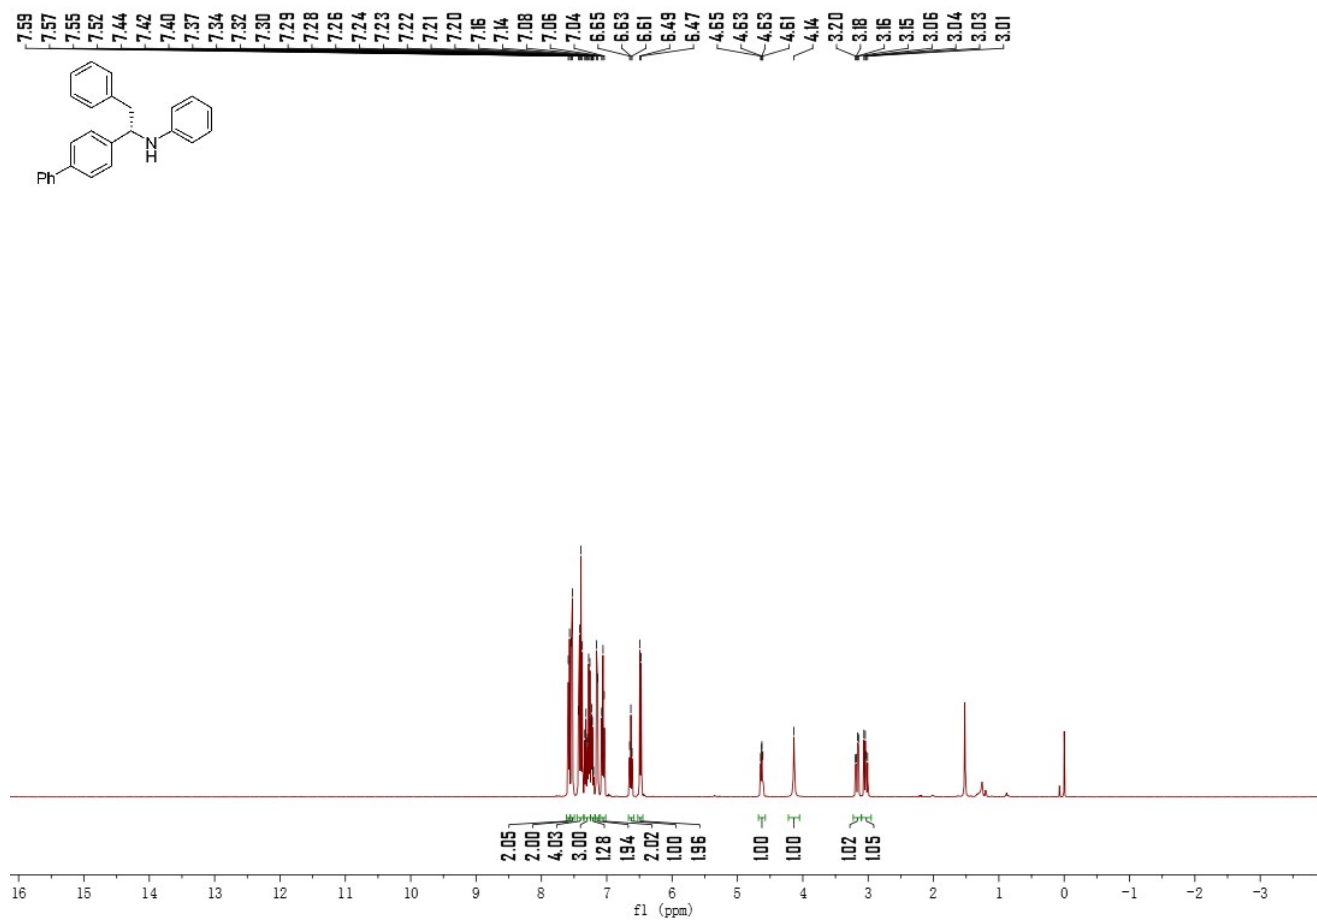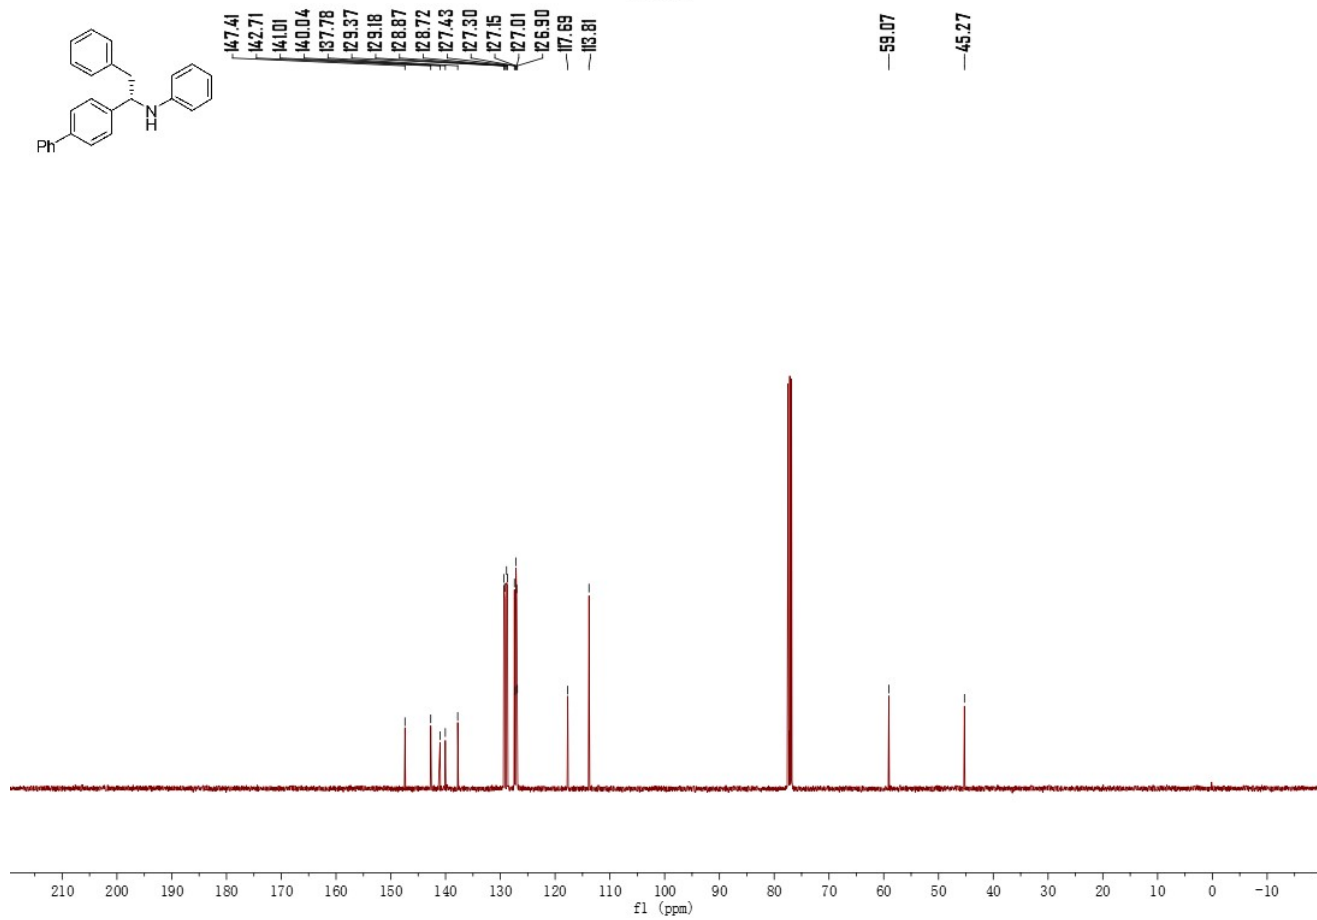

(S)-11-benzyl-10,11-dihydrodibenzo[*b,f*][1,4]oxazepine (3as)

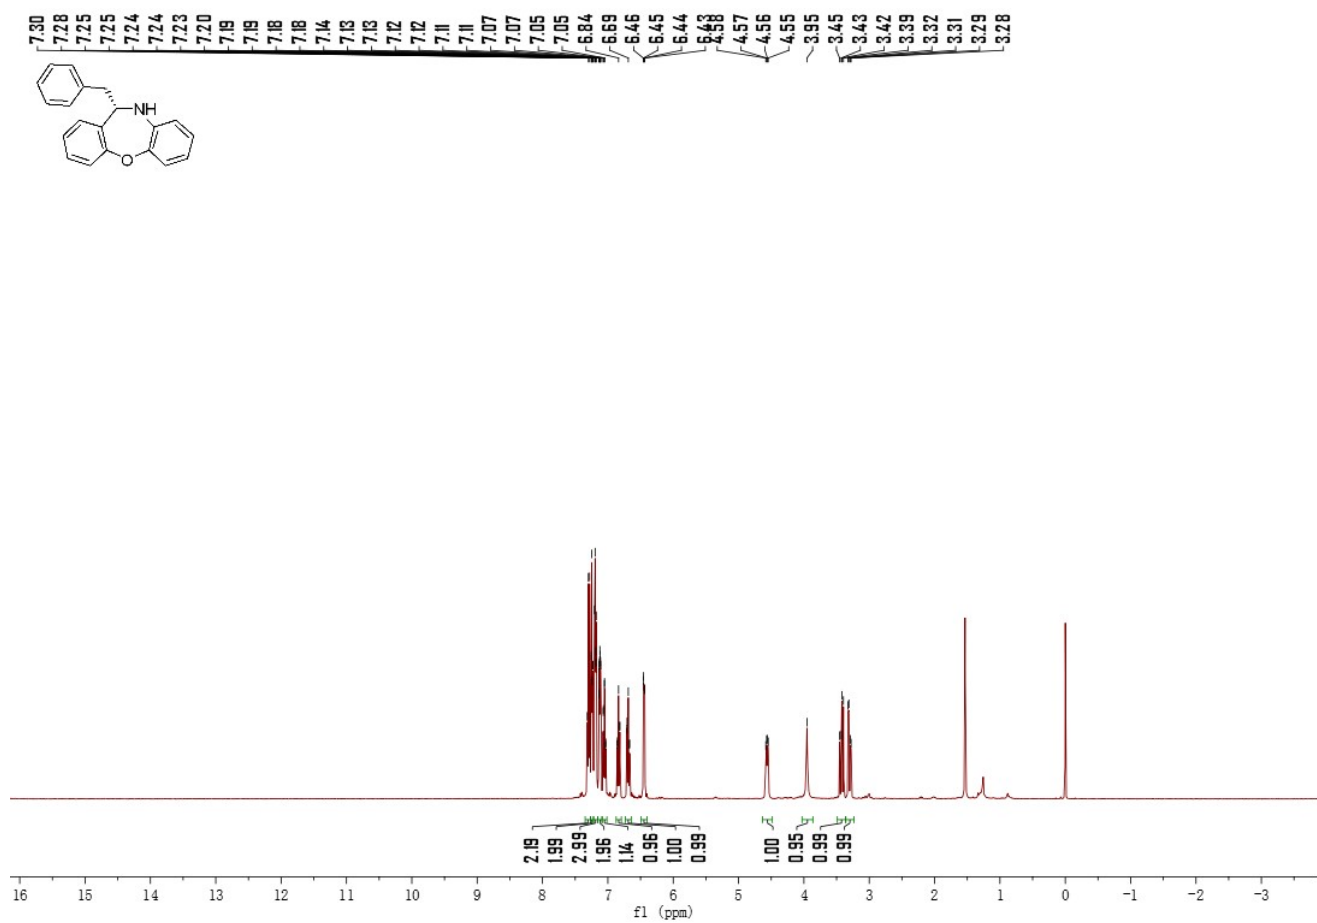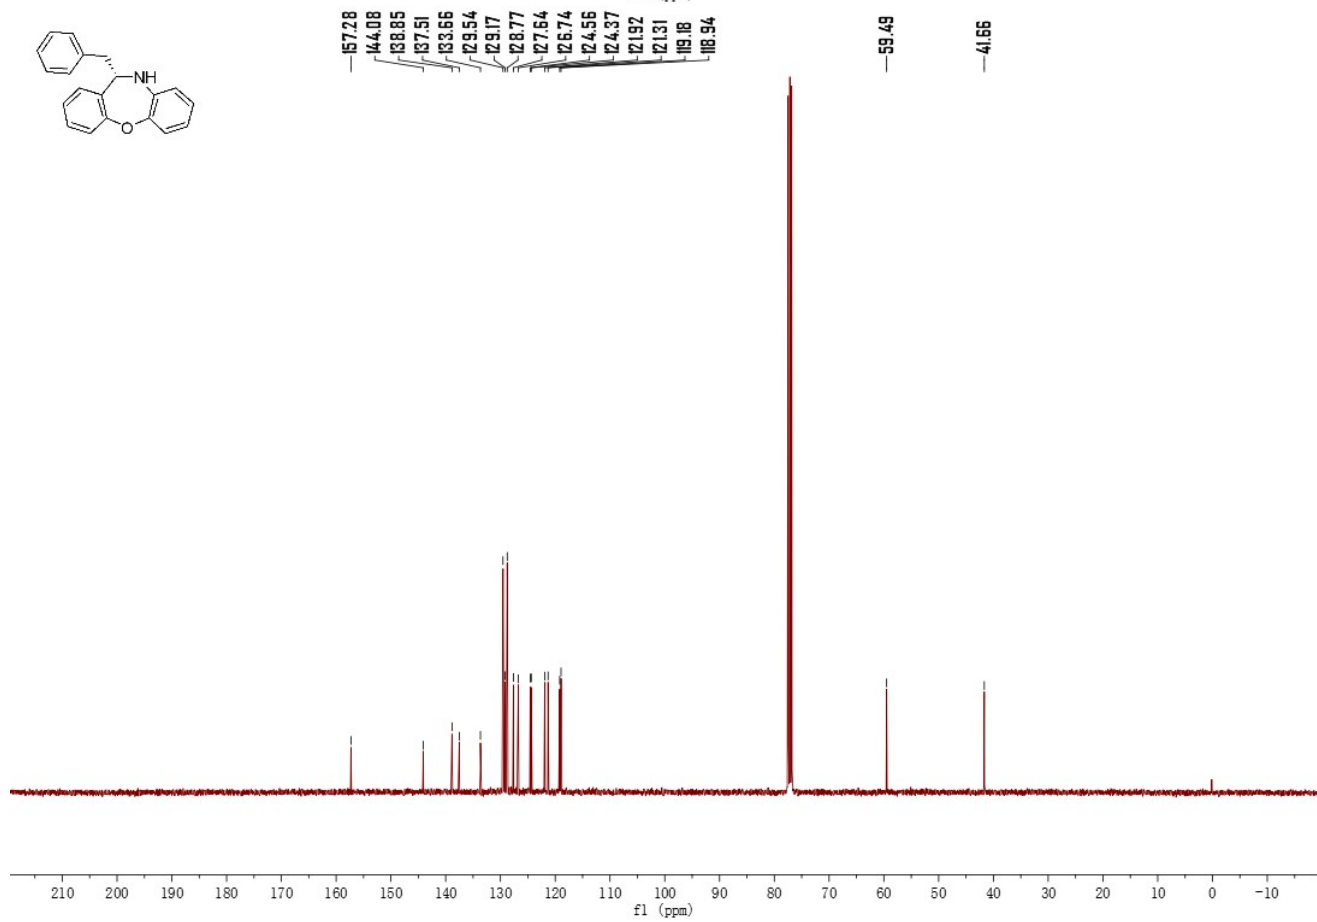

(S,E)-N-(1,4-diphenylbut-3-en-2-yl)aniline (3at)



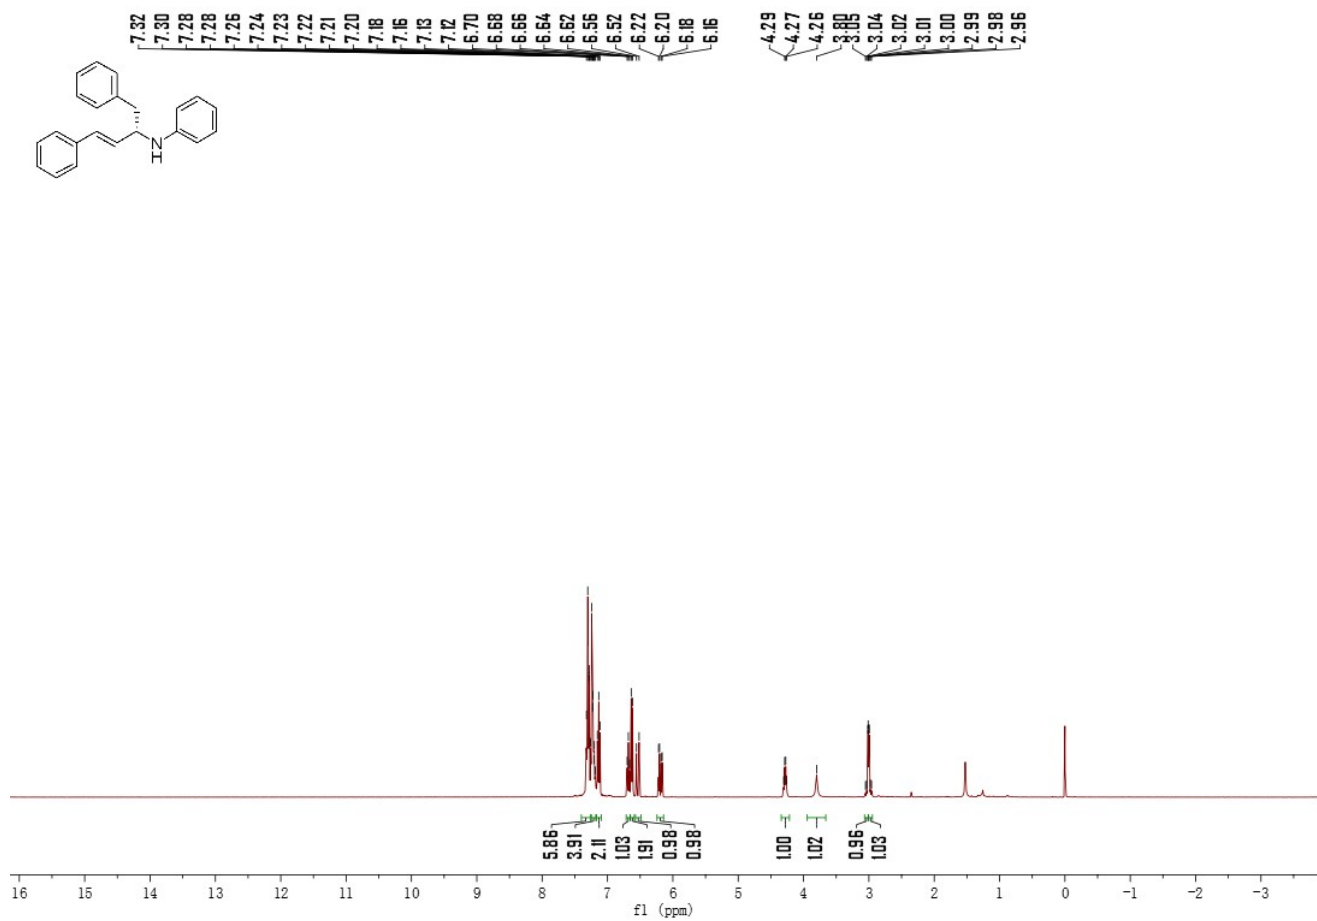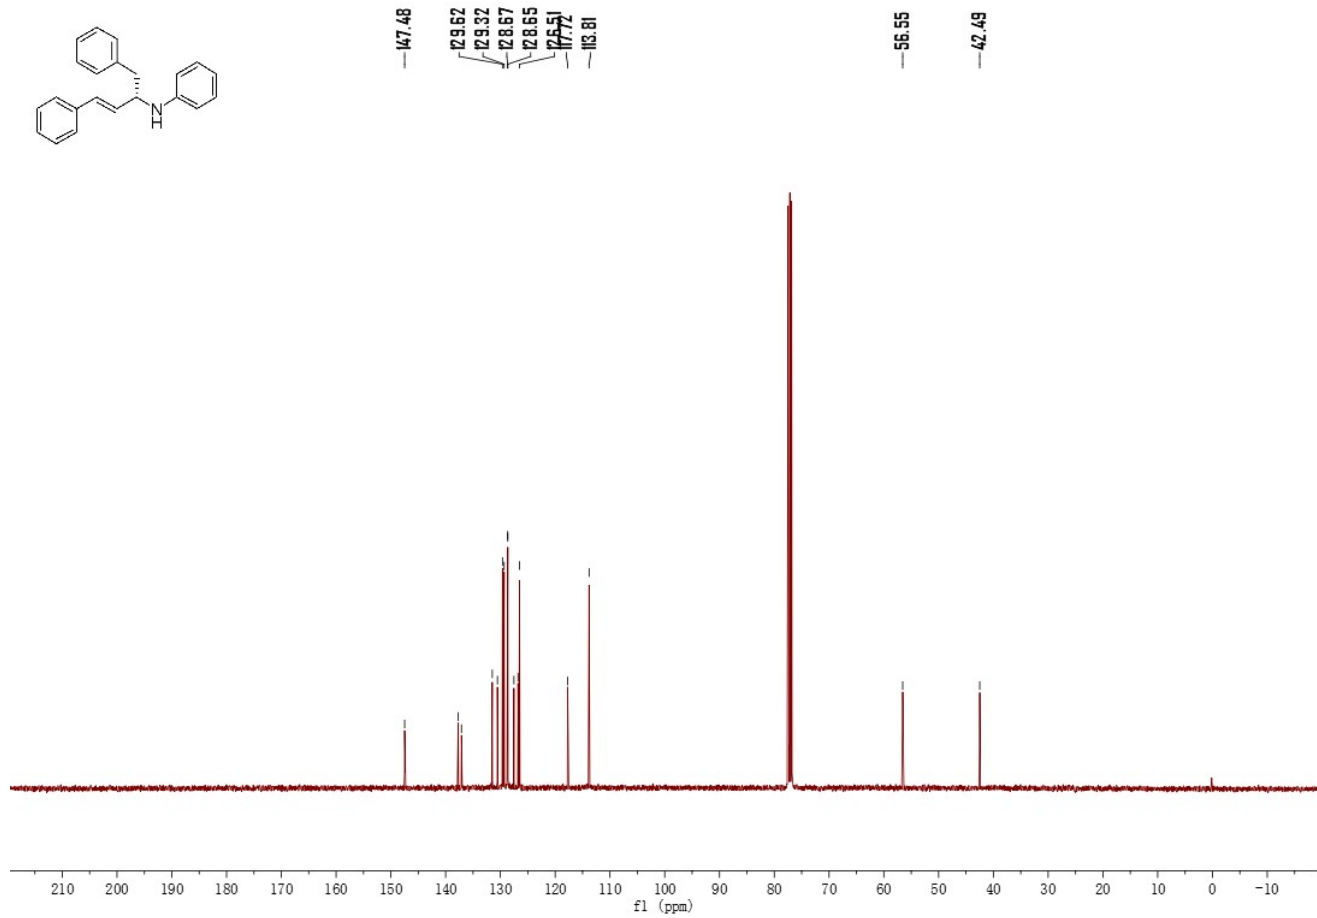

(S)-N-(1,2-diphenylethyl)-4-methoxyaniline (3au)

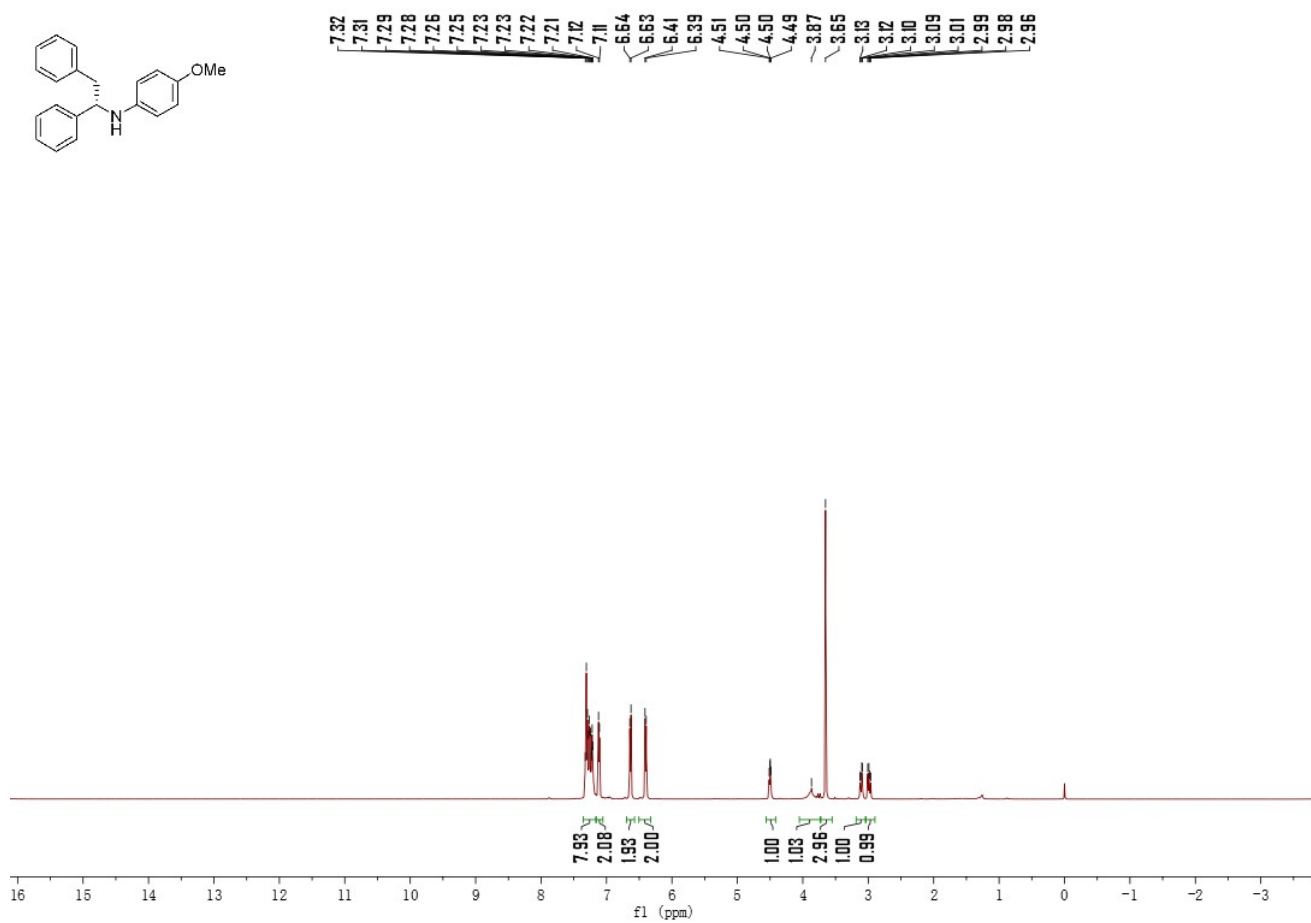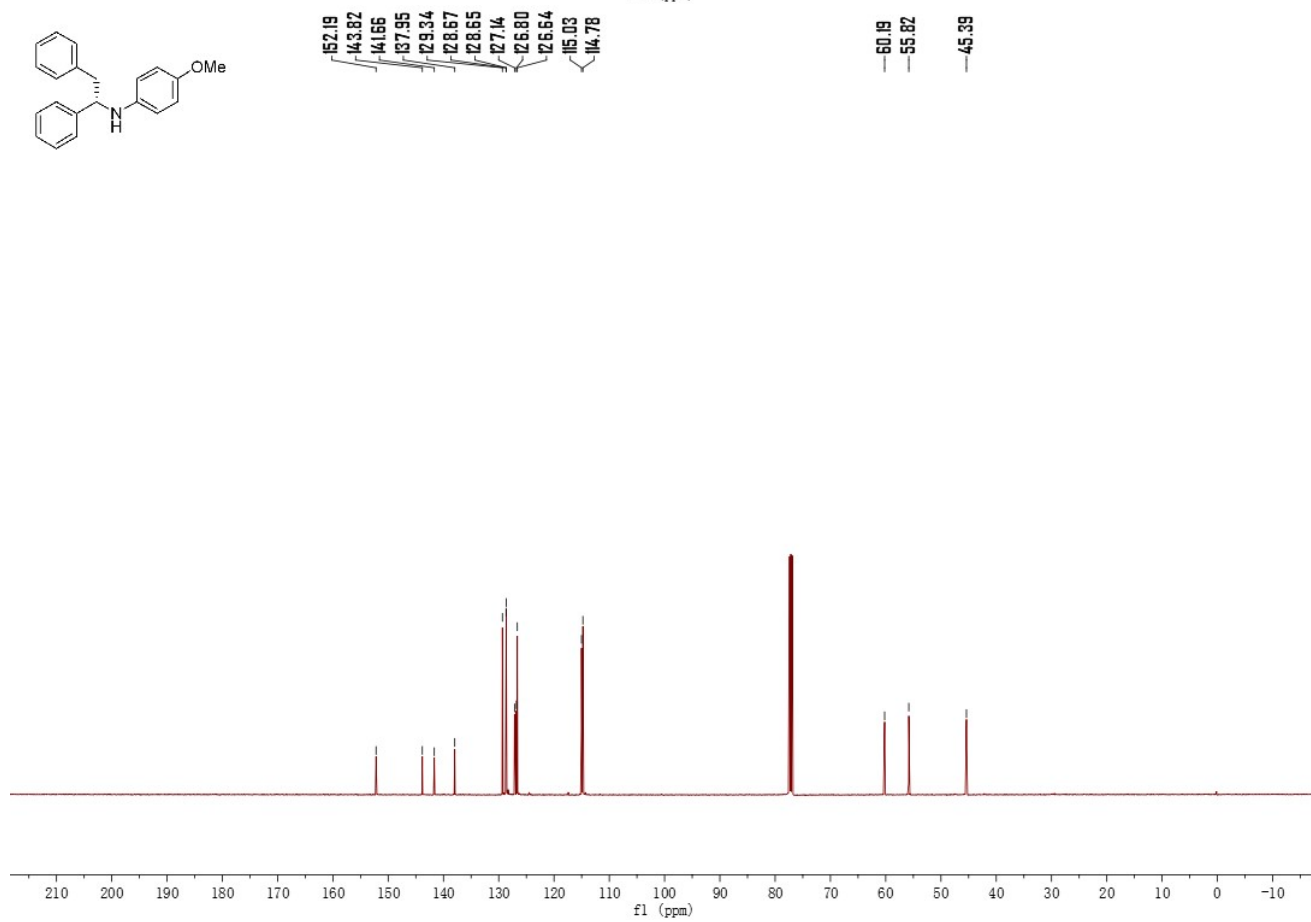

(S)-4-chloro-N-(1,2-diphenylethyl)aniline (3av)

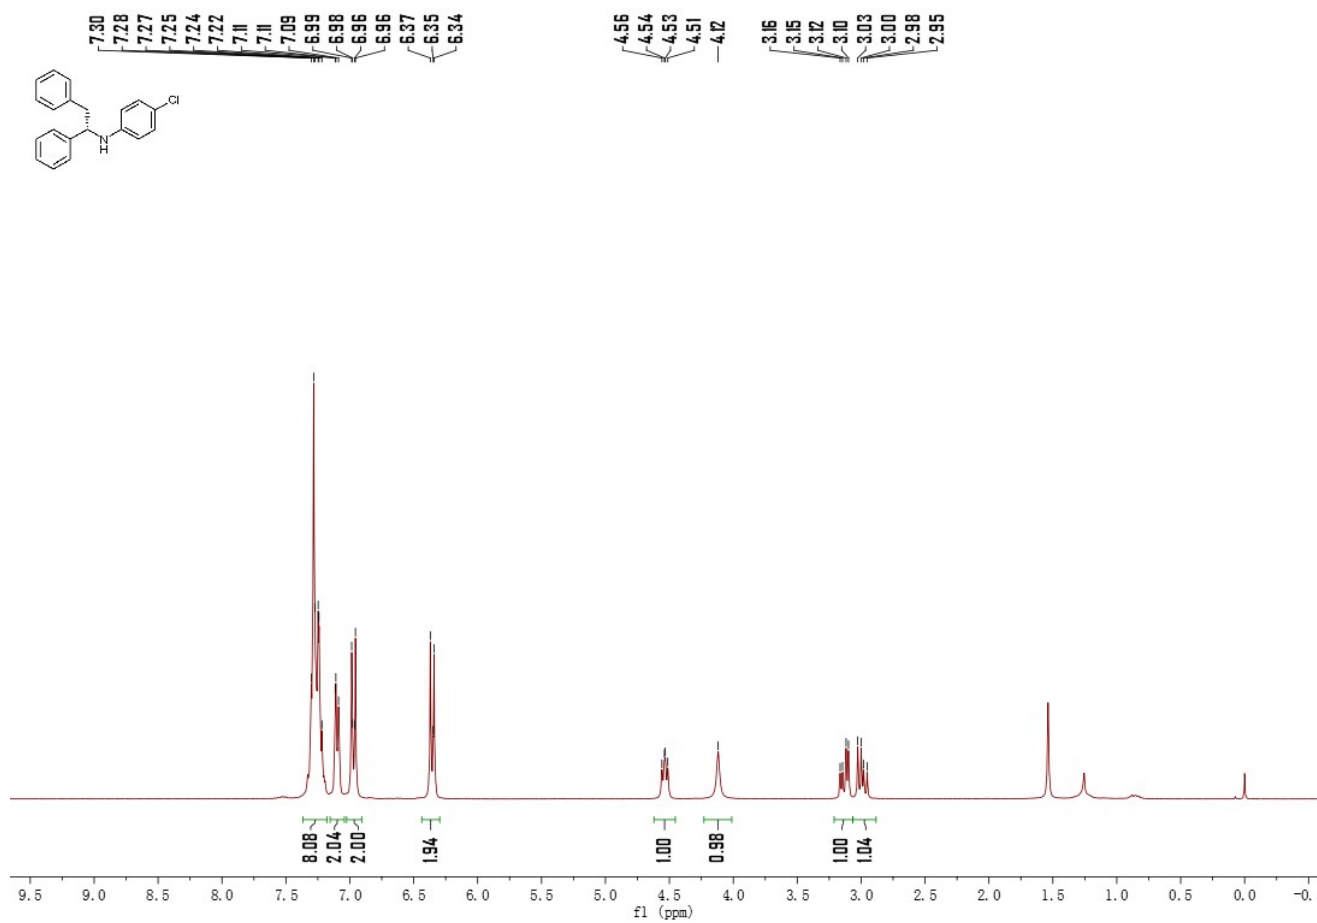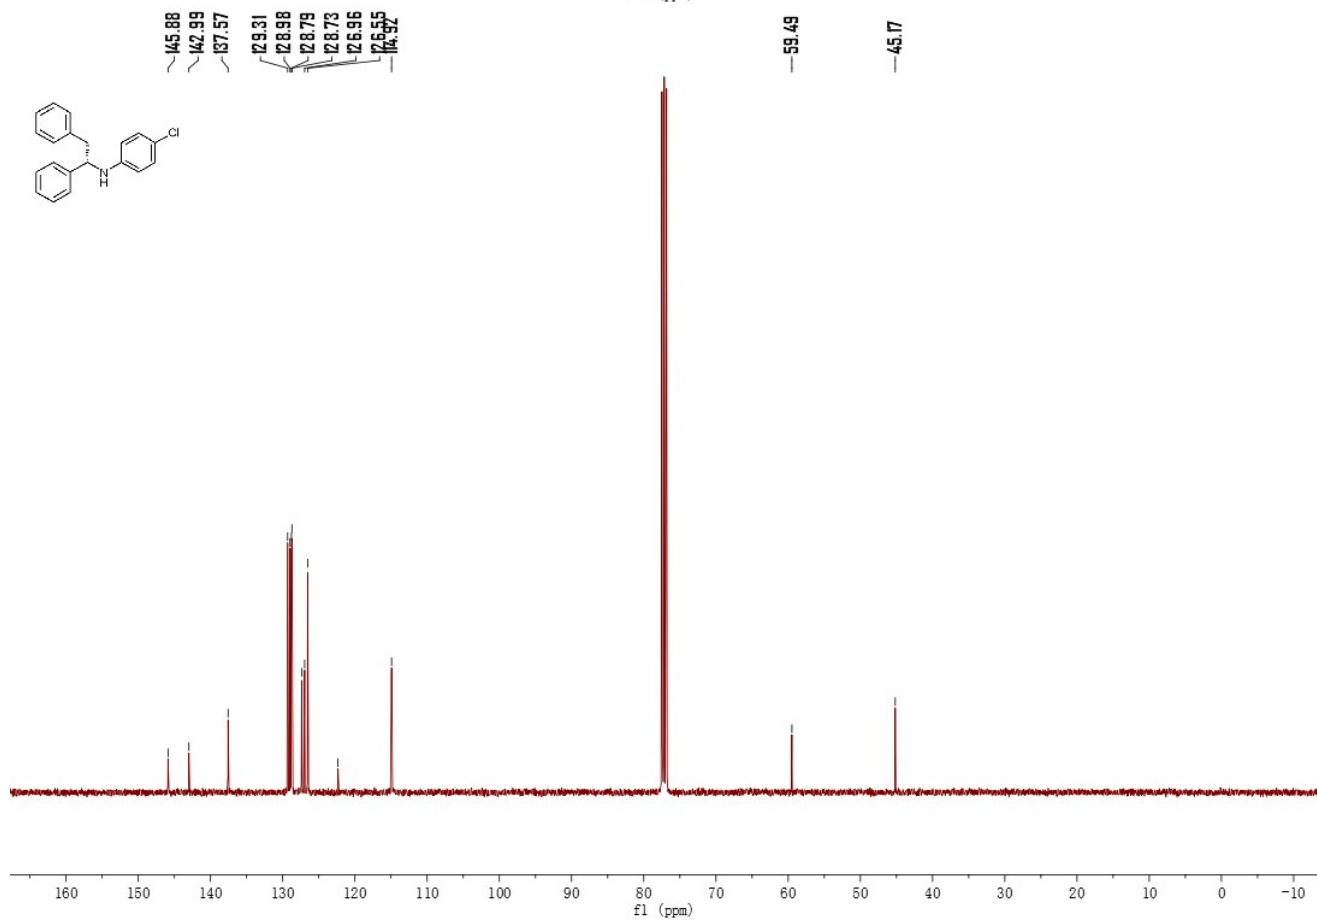

(S)-1,2-diphenylethan-1-amine (4)

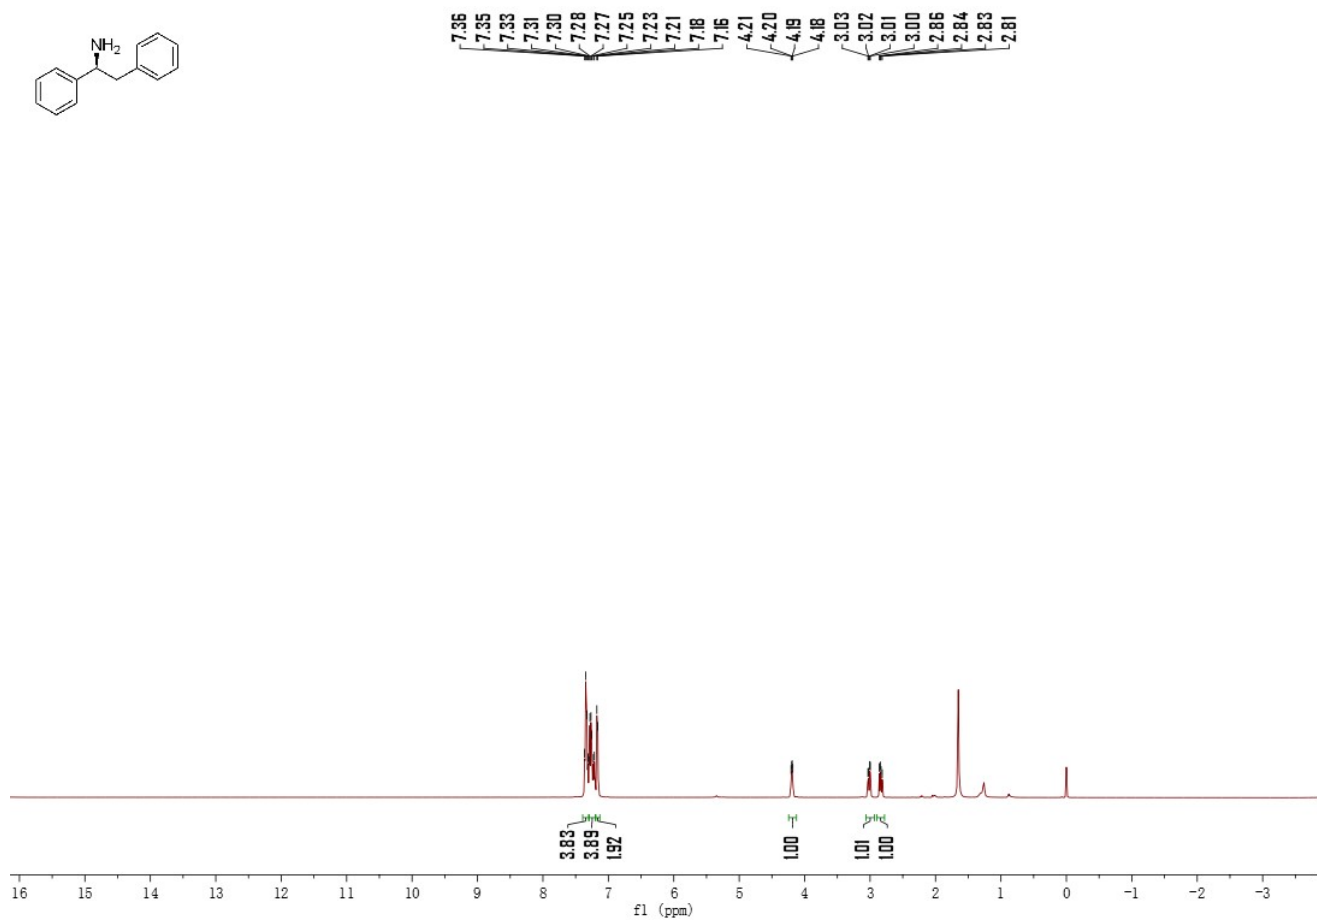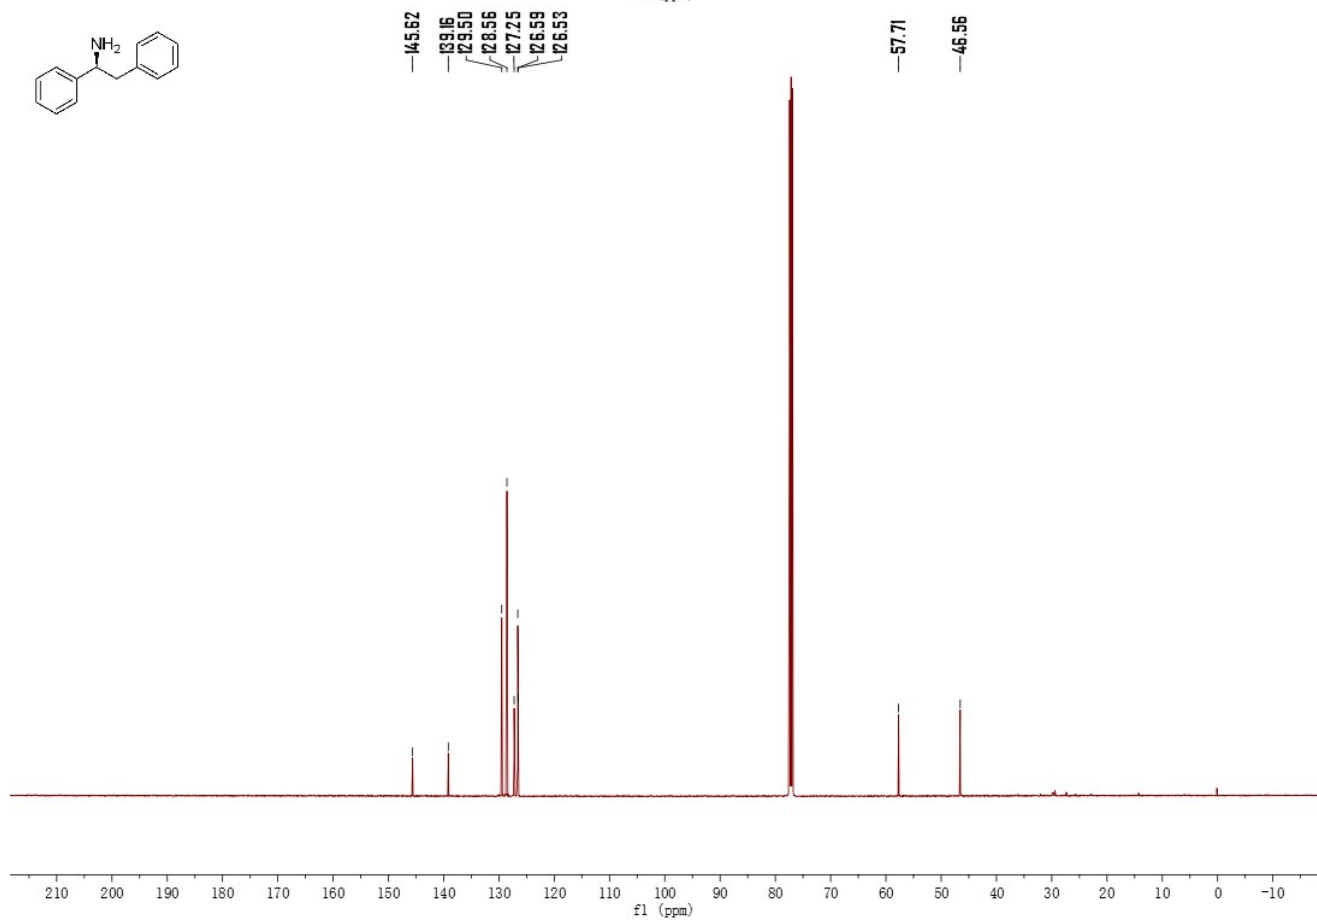

(S)-N-(1,2-diphenylethyl-2-d)aniline (*d*-3aa)

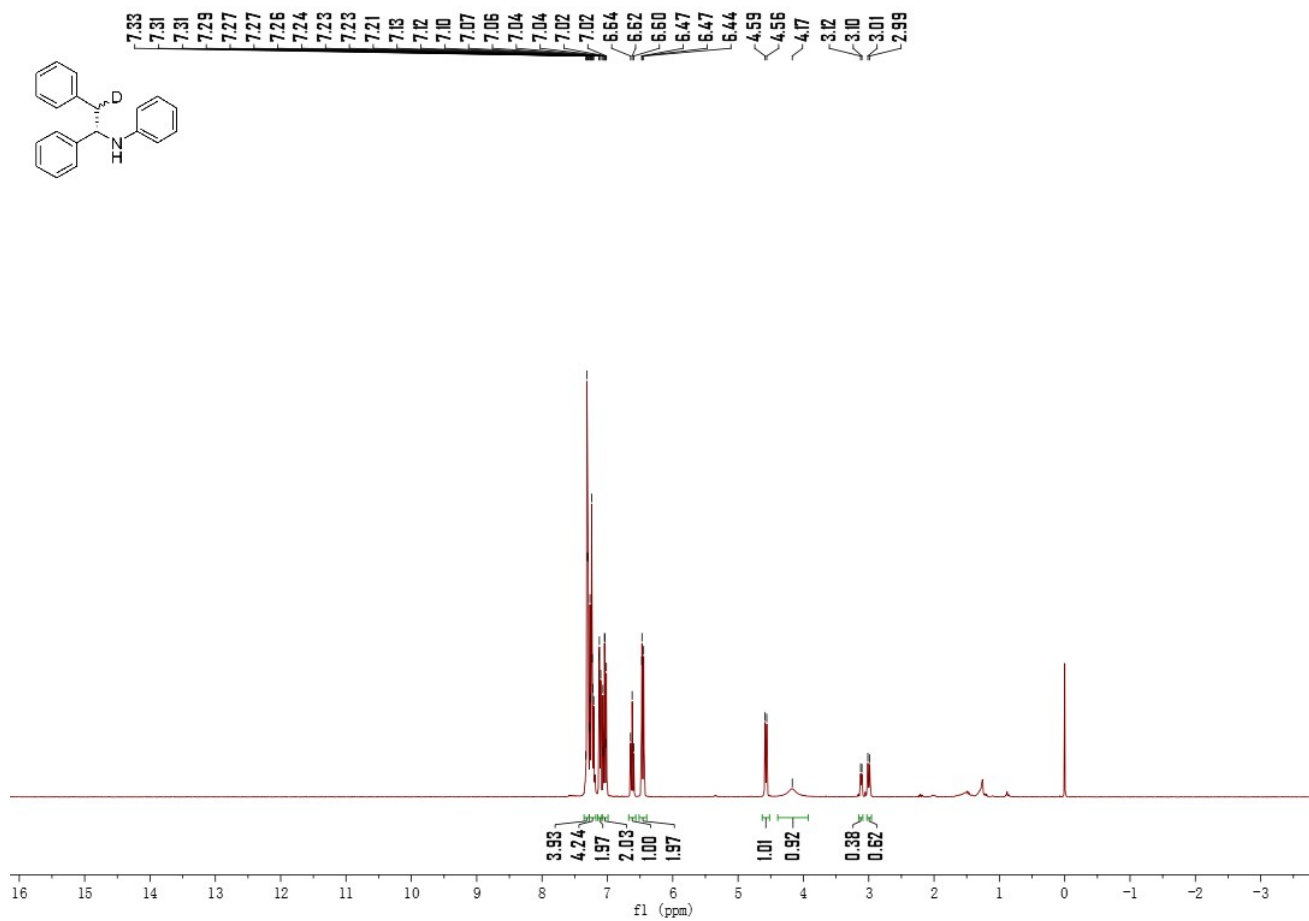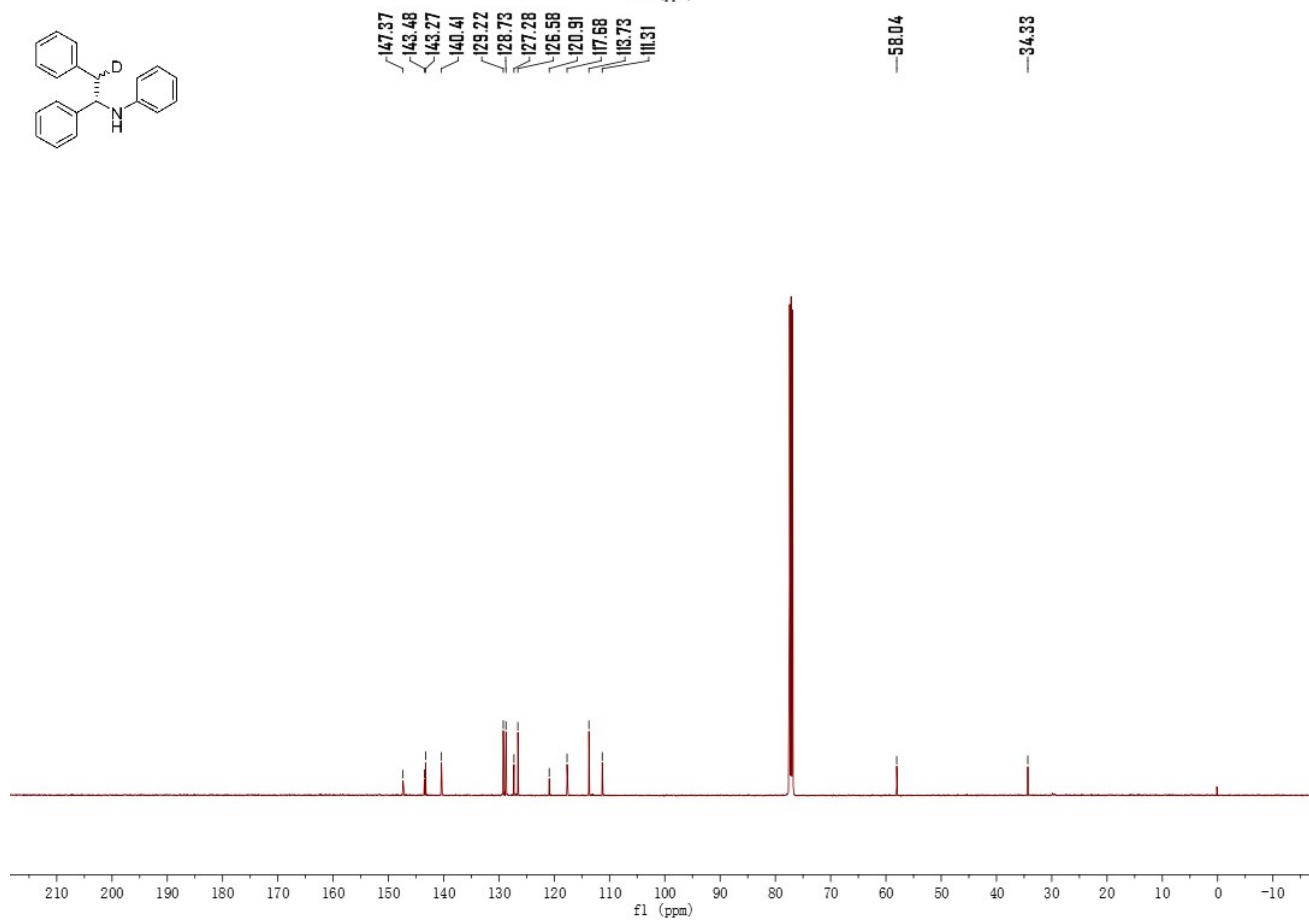

## VII. HPLC Spectra

**(S)-N-(1,2-diphenylethyl)aniline (3aa)**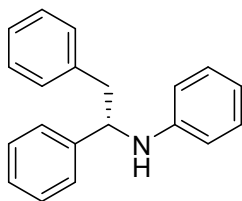HPLC Spectra of Chiral **3aa**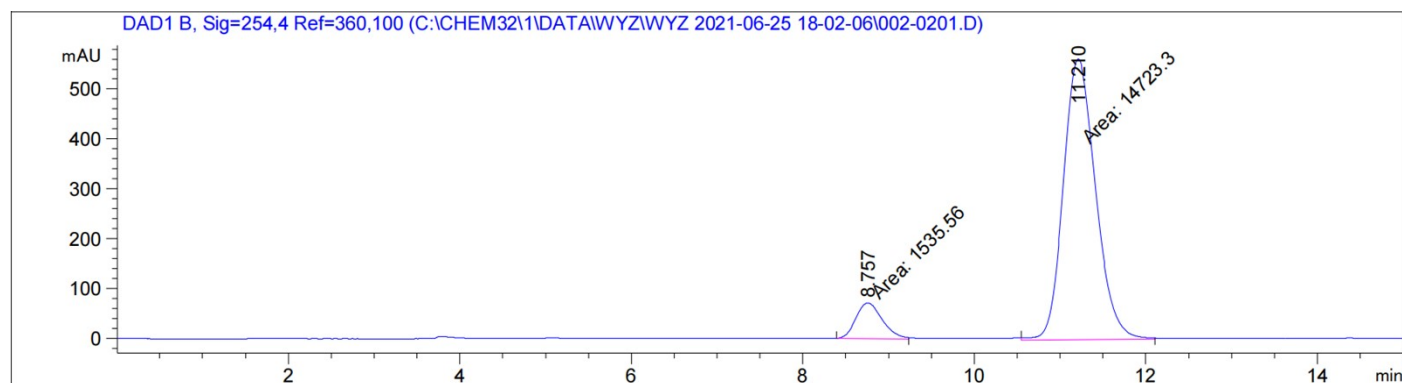

Signal 2: DAD1 B, Sig=254,4 Ref=360,100

| Peak # | RetTime [min] | Type | Width [min] | Area [mAU*s] | Area %  | Name |
|--------|---------------|------|-------------|--------------|---------|------|
| 1      | 8.757         | MM   | 0.3582      | 1535.55847   | 9.4445  | ?    |
| 2      | 11.210        | MM   | 0.4359      | 1.47233e4    | 90.5555 | ?    |

Totals : 1.62588e4

HPLC Spectra of Racemic **3aa**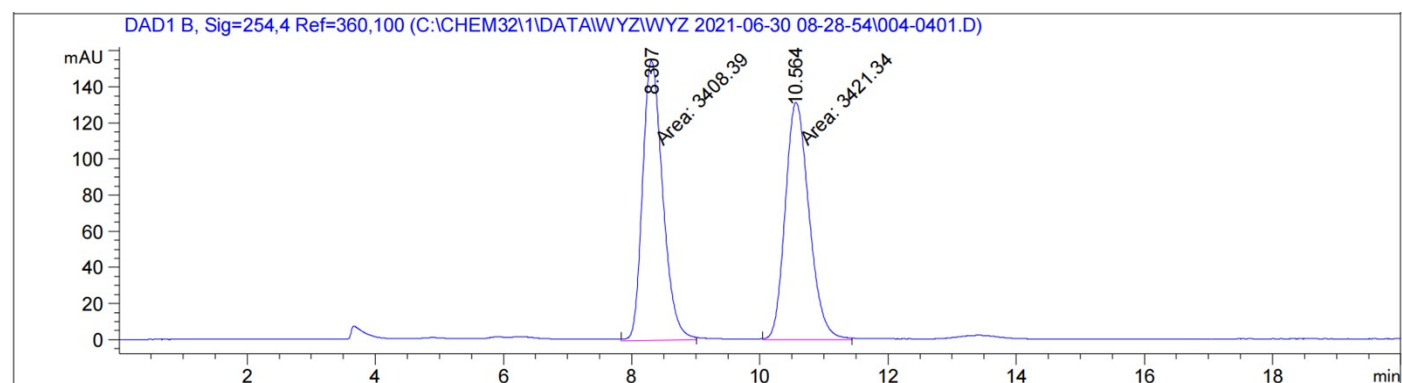

Signal 2: DAD1 B, Sig=254,4 Ref=360,100

| Peak # | RetTime [min] | Type | Width [min] | Area [mAU*s] | Area %  | Name |
|--------|---------------|------|-------------|--------------|---------|------|
| 1      | 8.307         | MM   | 0.3664      | 3408.39185   | 49.9052 | ?    |
| 2      | 10.564        | MM   | 0.4333      | 3421.33521   | 50.0948 | ?    |

Totals : 6829.72705

**(S)-N-(2-(3-methoxyphenyl)-1-phenylethyl)aniline (3ba)**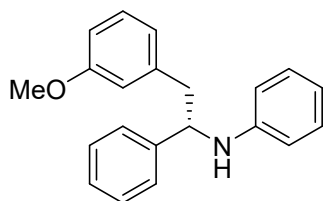**HPLC Spectra of Chiral 3ba**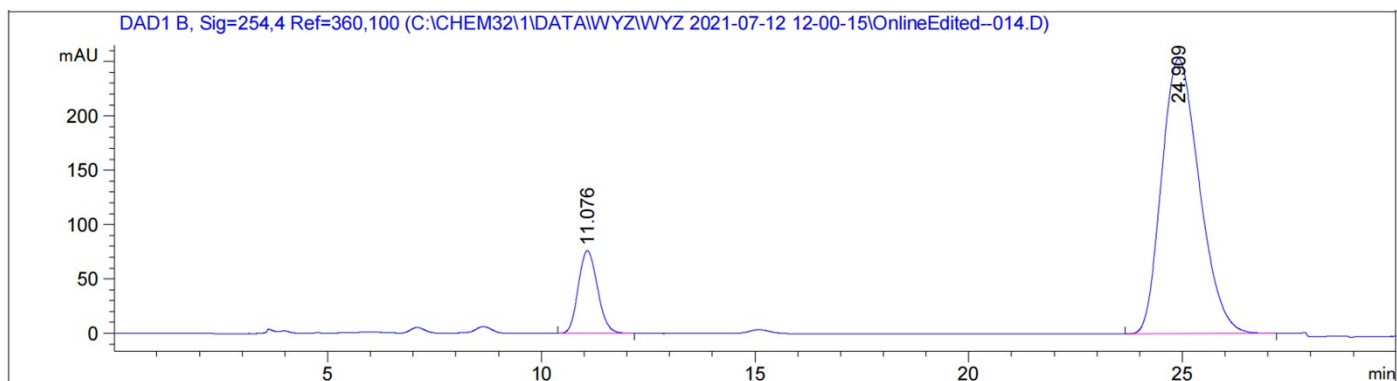

Signal 2: DAD1 B, Sig=254,4 Ref=360,100

| Peak # | RetTime [min] | Type | Width [min] | Area [mAU*s] | Height [mAU] | Area %  |
|--------|---------------|------|-------------|--------------|--------------|---------|
| 1      | 11.076        | BB   | 0.4916      | 2372.69312   | 76.12232     | 13.2638 |
| 2      | 24.909        | BB   | 0.9490      | 1.55158e4    | 253.16173    | 86.7362 |

Totals : 1.78884e4 329.28405

**HPLC Spectra of Racemic 3ba**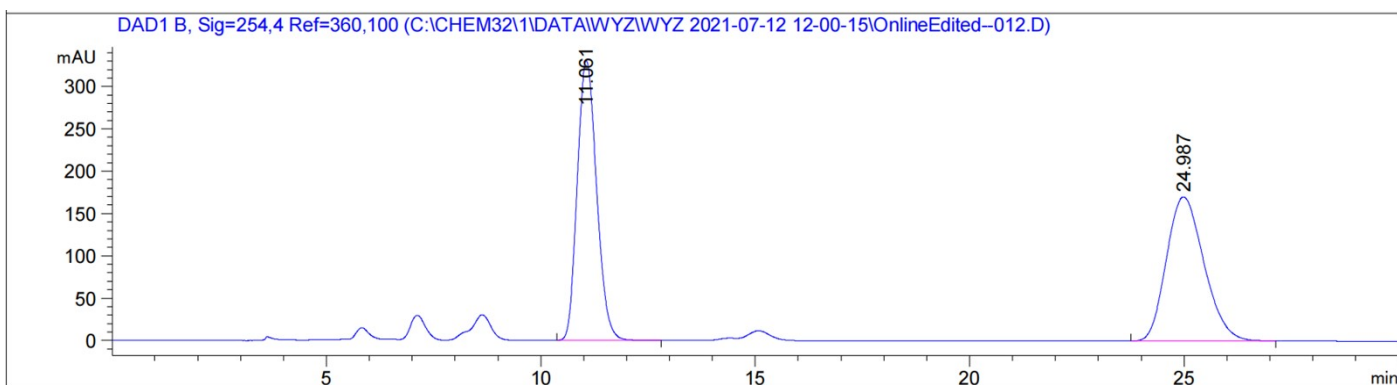

Signal 2: DAD1 B, Sig=254,4 Ref=360,100

| Peak # | RetTime [min] | Type | Width [min] | Area [mAU*s] | Height [mAU] | Area %  |
|--------|---------------|------|-------------|--------------|--------------|---------|
| 1      | 11.061        | BB   | 0.4955      | 1.03451e4    | 330.23853    | 49.9788 |
| 2      | 24.987        | BB   | 0.9299      | 1.03539e4    | 170.16026    | 50.0212 |

Totals : 2.06990e4 500.39879

**(S)-N-(2-(4-methoxyphenyl)-1-phenylethyl)aniline (3ca)**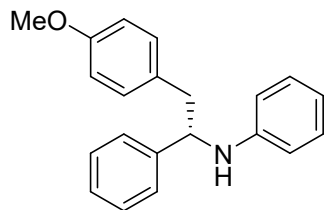**HPLC Spectra of Chiral 3ca**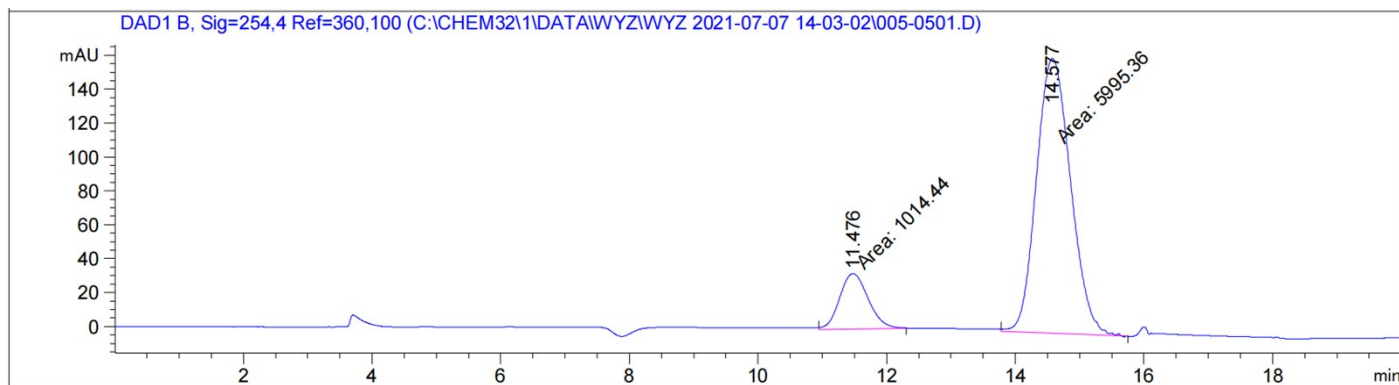

Signal 2: DAD1 B, Sig=254,4 Ref=360,100

| Peak # | RetTime [min] | Type | Width [min] | Area [mAU*s] | Area %  | Name |
|--------|---------------|------|-------------|--------------|---------|------|
| 1      | 11.476        | MM   | 0.5160      | 1014.44080   | 14.4717 | ?    |
| 2      | 14.577        | MM   | 0.6163      | 5995.36475   | 85.5283 | ?    |

Totals : 7009.80554

**HPLC Spectra of Racemic 3ca**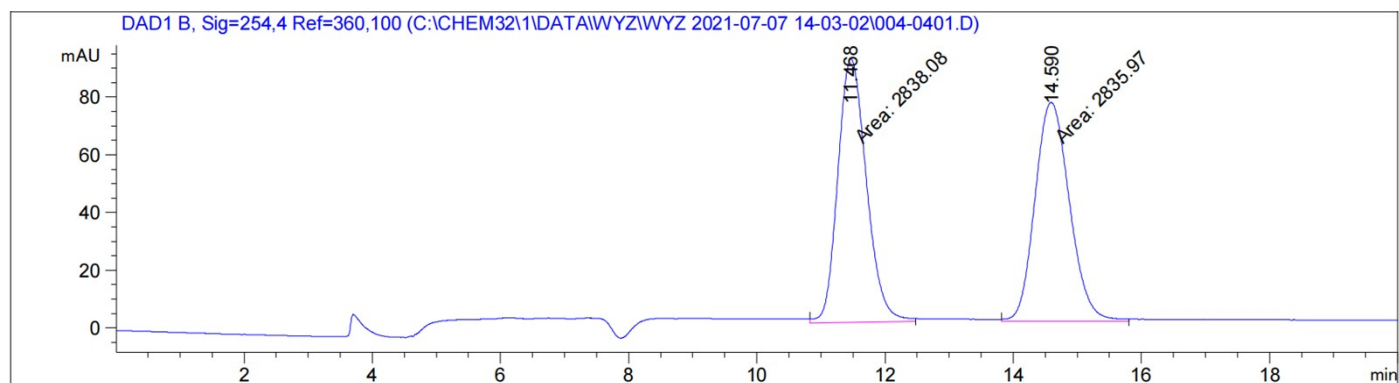

Signal 2: DAD1 B, Sig=254,4 Ref=360,100

| Peak # | RetTime [min] | Type | Width [min] | Area [mAU*s] | Area %  | Name |
|--------|---------------|------|-------------|--------------|---------|------|
| 1      | 11.468        | MM   | 0.5184      | 2838.08350   | 50.0186 | ?    |
| 2      | 14.590        | MM   | 0.6237      | 2835.96802   | 49.9814 | ?    |

Totals : 5674.05151



**(S)-N-(2-(2,3-dimethoxyphenyl)-1-phenylethyl)aniline (3da)**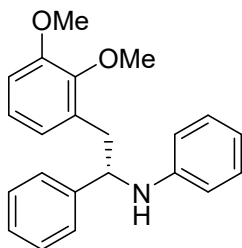**HPLC Spectra of Chiral 3da**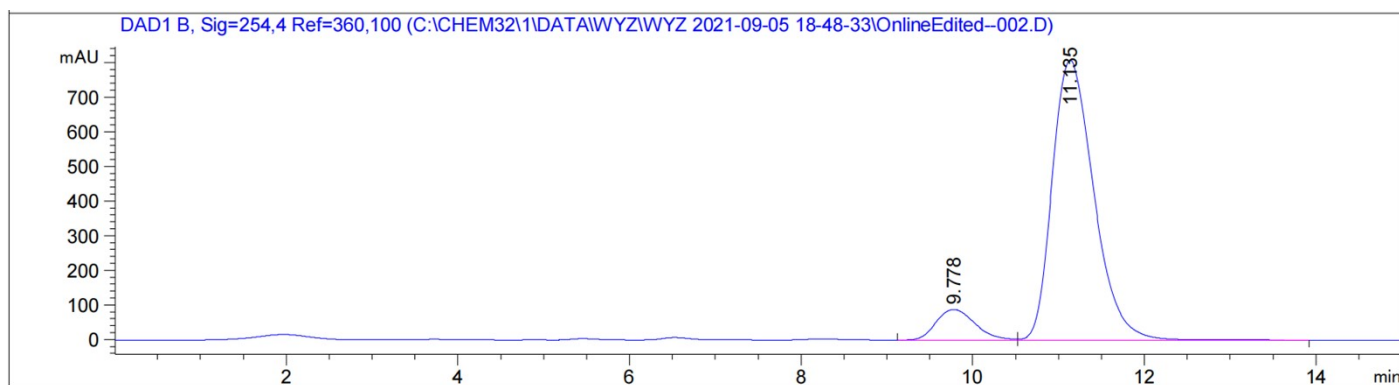

Signal 2: DAD1 B, Sig=254,4 Ref=360,100

| Peak # | RetTime [min] | Type | Width [min] | Area [mAU*s] | Area %  | Name |
|--------|---------------|------|-------------|--------------|---------|------|
| 1      | 9.778         | BV   | 0.4968      | 2776.96265   | 9.2833  | ?    |
| 2      | 11.135        | VB   | 0.5281      | 2.71367e4    | 90.7167 | ?    |

Totals : 2.99136e4

**HPLC Spectra of Racemic 3da**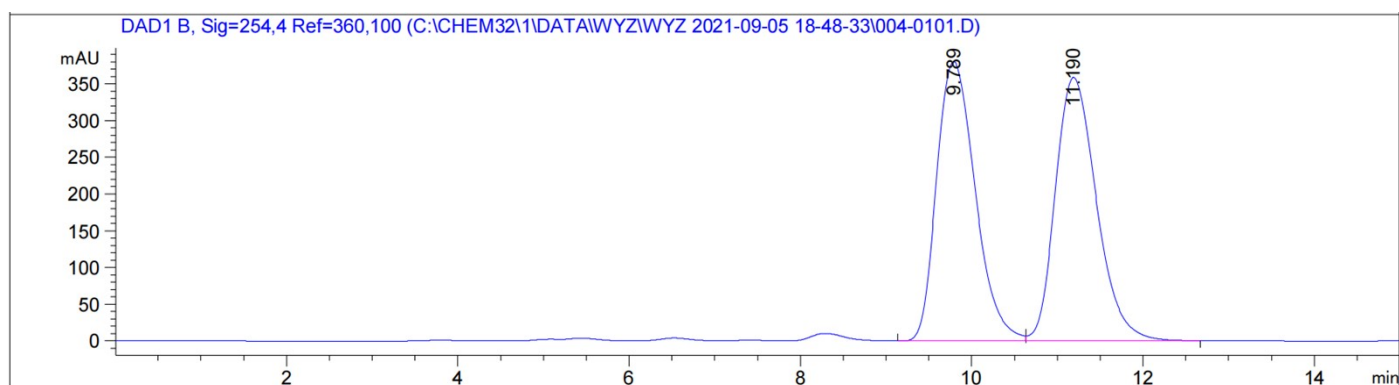

Signal 2: DAD1 B, Sig=254,4 Ref=360,100

| Peak # | RetTime [min] | Type | Width [min] | Area [mAU*s] | Area %  | Name |
|--------|---------------|------|-------------|--------------|---------|------|
| 1      | 9.789         | BV   | 0.4949      | 1.18958e4    | 49.8943 | ?    |
| 2      | 11.190        | VB   | 0.5226      | 1.19462e4    | 50.1057 | ?    |

Totals : 2.38420e4

**(S)-N-(2-(3,4-dimethoxyphenyl)-1-phenylethyl)aniline (3ea)**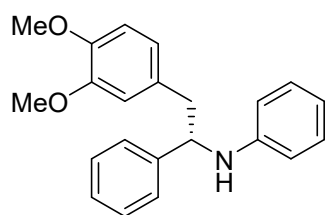**HPLC Spectra of Chiral 3ea**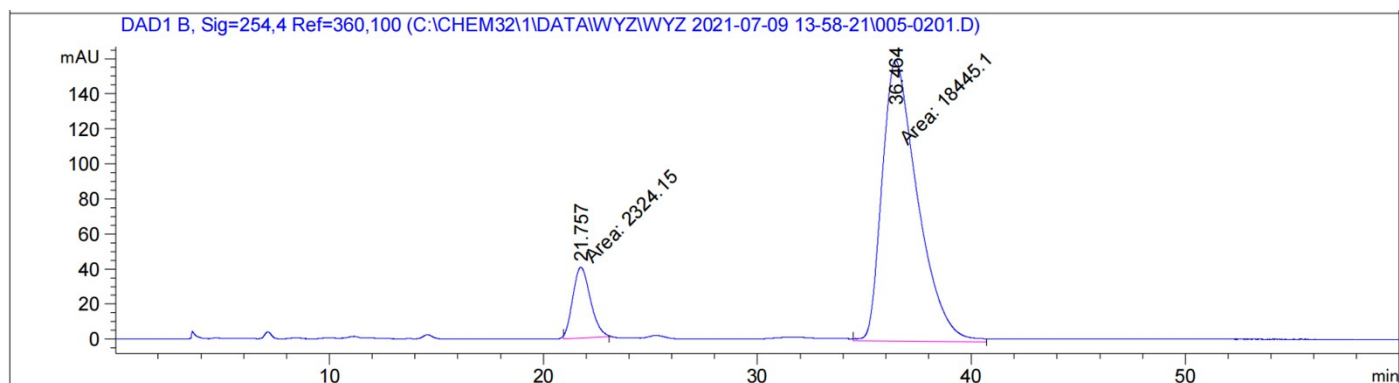

Signal 2: DAD1 B, Sig=254,4 Ref=360,100

| Peak # | RetTime [min] | Type | Width [min] | Area [mAU*s] | Height [mAU] | Area %  |
|--------|---------------|------|-------------|--------------|--------------|---------|
| 1      | 21.757        | MM   | 0.9584      | 2324.15137   | 40.41644     | 11.1904 |
| 2      | 36.464        | MM   | 1.9195      | 1.84451e4    | 160.15160    | 88.8096 |

Totals :                      2.07692e4    200.56803

**HPLC Spectra of Racemic 3ea**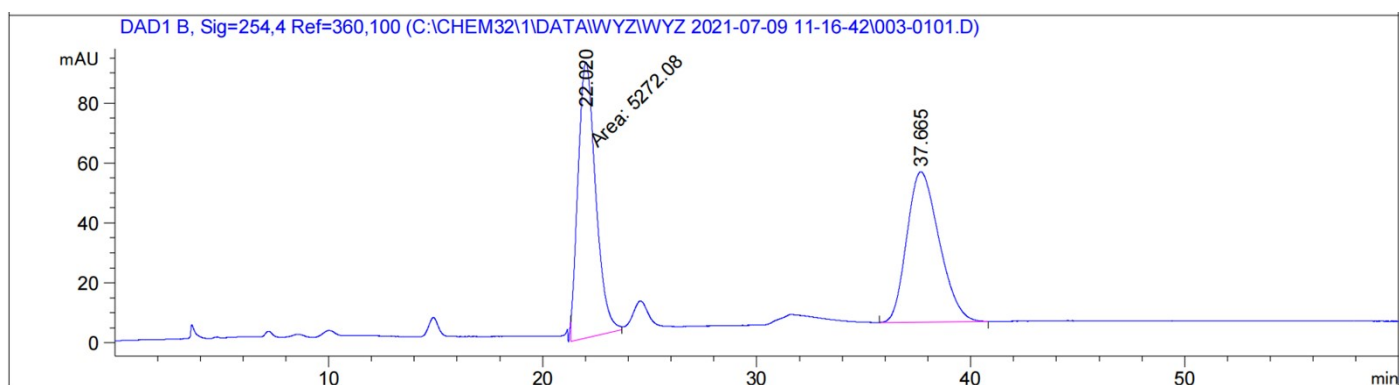

Signal 2: DAD1 B, Sig=254,4 Ref=360,100

| Peak # | RetTime [min] | Type | Width [min] | Area [mAU*s] | Height [mAU] | Area %  |
|--------|---------------|------|-------------|--------------|--------------|---------|
| 1      | 22.020        | MM   | 0.9562      | 5272.08496   | 91.89688     | 50.0251 |
| 2      | 37.665        | BB   | 1.2310      | 5266.79541   | 50.16089     | 49.9749 |

Totals :                      1.05389e4    142.05777

**(S)-N-(2-(3,5-dimethoxyphenyl)-1-phenylethyl)aniline (3fa)**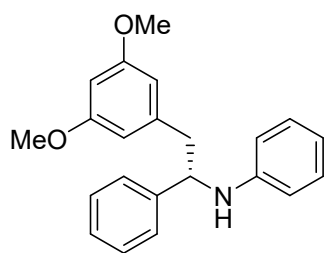**HPLC Spectra of Chiral 3fa**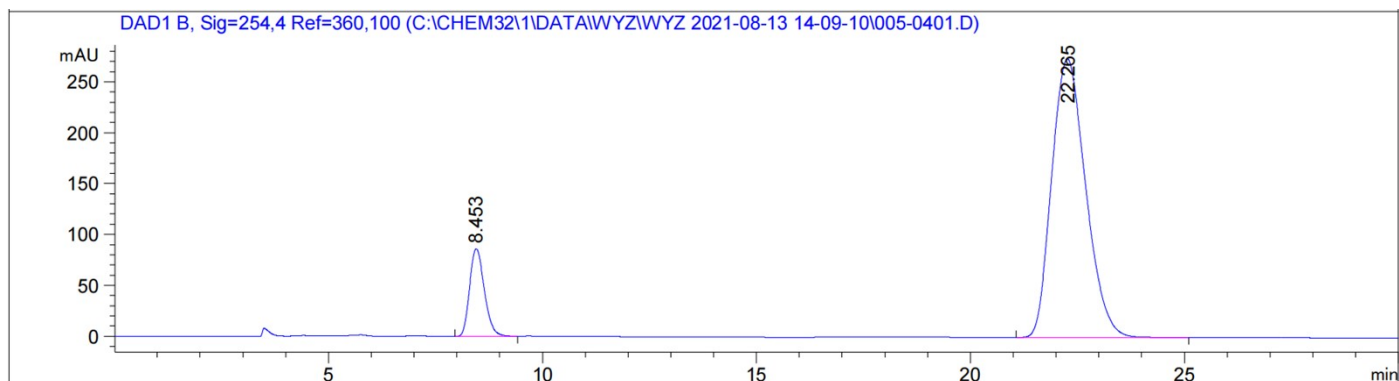

Signal 2: DAD1 B, Sig=254,4 Ref=360,100

| Peak # | RetTime [min] | Type | Width [min] | Area [mAU*s] | Area %  | Name |
|--------|---------------|------|-------------|--------------|---------|------|
| 1      | 8.453         | BB   | 0.3734      | 2064.53491   | 12.0235 | ?    |
| 2      | 22.265        | BB   | 0.8648      | 1.51063e4    | 87.9765 | ?    |

Totals : 1.71708e4

**HPLC Spectra of Racemic 3fa**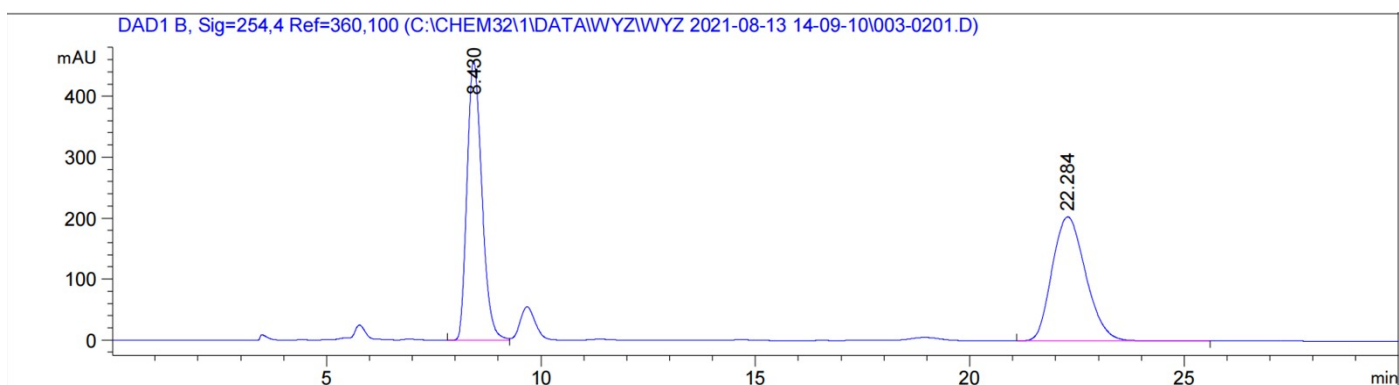

Signal 2: DAD1 B, Sig=254,4 Ref=360,100

| Peak # | RetTime [min] | Type | Width [min] | Area [mAU*s] | Area %  | Name |
|--------|---------------|------|-------------|--------------|---------|------|
| 1      | 8.430         | BV   | 0.3763      | 1.10084e4    | 49.9130 | ?    |
| 2      | 22.284        | BB   | 0.8558      | 1.10467e4    | 50.0870 | ?    |

Totals : 2.20551e4

**(S)-N-(1-phenyl-2-(3,4,5-trimethoxyphenyl)ethyl)aniline (3ga)**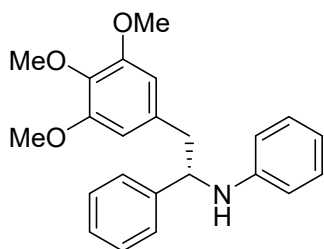**HPLC Spectra of Chiral 3ga**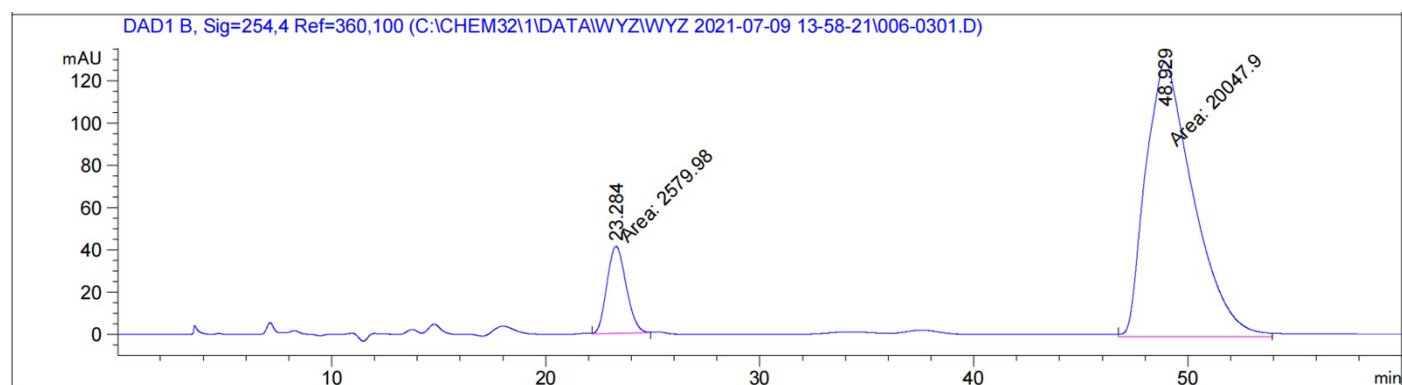

Signal 2: DAD1 B, Sig=254,4 Ref=360,100

| Peak # | RetTime [min] | Type | Width [min] | Area [mAU*s] | Height [mAU] | Area %  |
|--------|---------------|------|-------------|--------------|--------------|---------|
| 1      | 23.284        | MM   | 1.0433      | 2579.98389   | 41.21444     | 11.4018 |
| 2      | 48.929        | MM   | 2.5671      | 2.00479e4    | 130.15926    | 88.5982 |

Totals : 2.26279e4 171.37370

**HPLC Spectra of Racemic 3ga**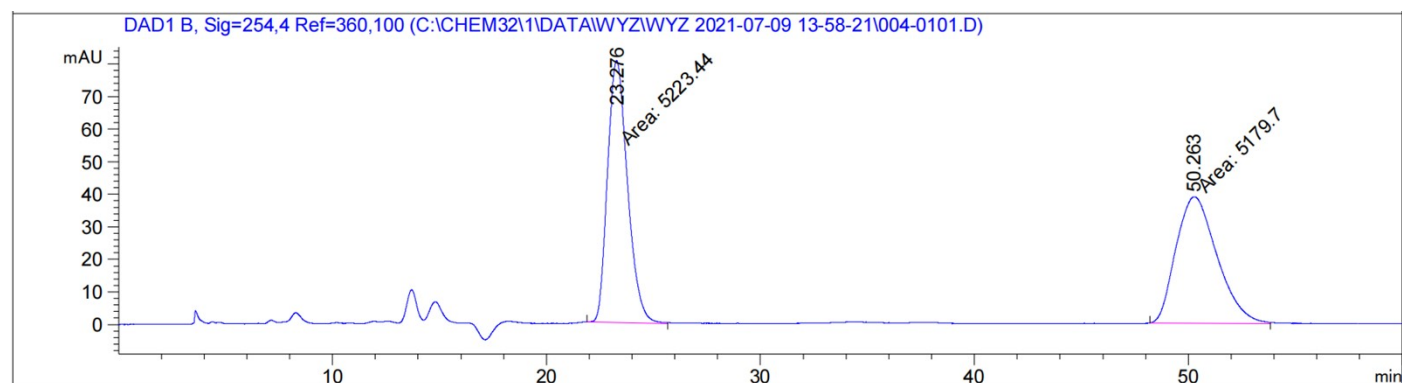

Signal 2: DAD1 B, Sig=254,4 Ref=360,100

| Peak # | RetTime [min] | Type | Width [min] | Area [mAU*s] | Height [mAU] | Area %  |
|--------|---------------|------|-------------|--------------|--------------|---------|
| 1      | 23.276        | MM   | 1.0823      | 5223.43848   | 80.43731     | 50.2102 |
| 2      | 50.263        | MM   | 2.2234      | 5179.69775   | 38.82799     | 49.7898 |

Totals : 1.04031e4 119.26530

**(S)-N-(2-(4-methoxy-3-methylphenyl)-1-phenylethyl)aniline (3ha)**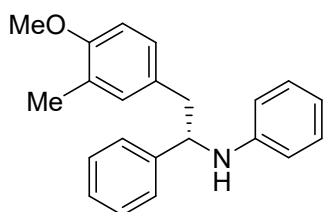**HPLC Spectra of Chiral 3ha**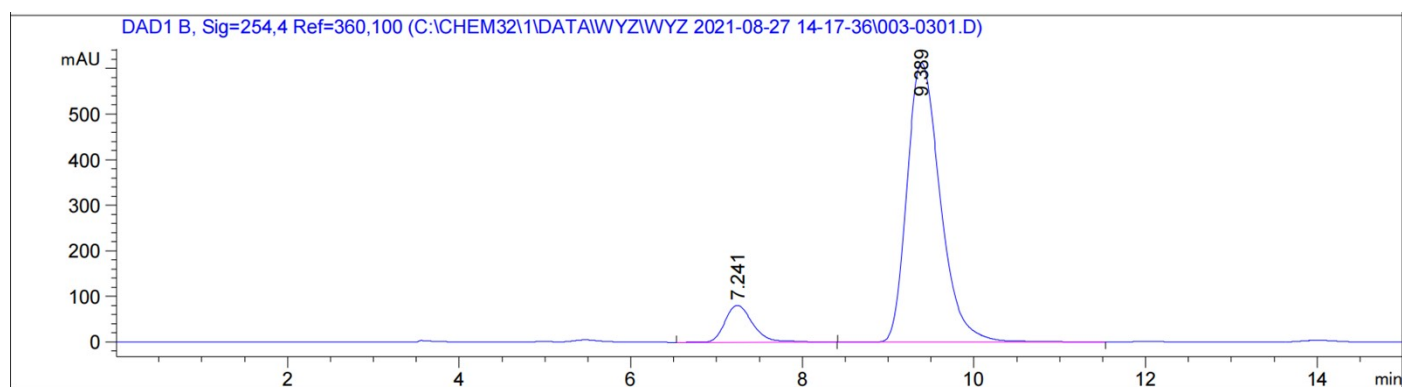

Signal 2: DAD1 B, Sig=254,4 Ref=360,100

| Peak # | RetTime [min] | Type | Width [min] | Area [mAU*s] | Area %  | Name |
|--------|---------------|------|-------------|--------------|---------|------|
| 1      | 7.241         | BB   | 0.3512      | 1842.16248   | 10.0346 | ?    |
| 2      | 9.389         | BB   | 0.4202      | 1.65160e4    | 89.9654 | ?    |

Totals : 1.83582e4

**HPLC Spectra of Racemic 3ha**

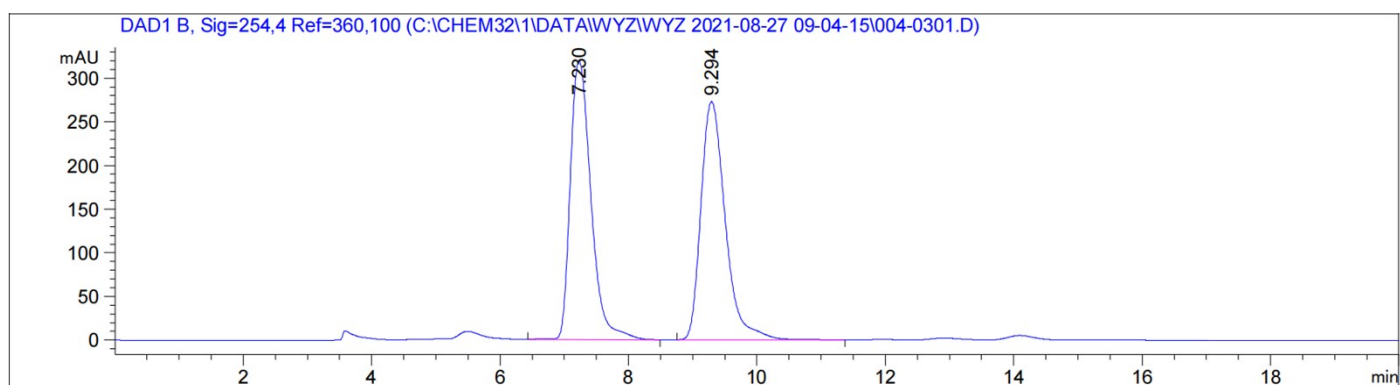

Signal 2: DAD1 B, Sig=254,4 Ref=360,100

| Peak # | RetTime [min] | Type | Width [min] | Area [mAU*s] | Area %  | Name |
|--------|---------------|------|-------------|--------------|---------|------|
| 1      | 7.230         | BB   | 0.3515      | 7151.96826   | 49.8730 | ?    |
| 2      | 9.294         | BB   | 0.4094      | 7188.40674   | 50.1270 | ?    |

Totals : 1.43404e4

### (S)-N-(2-(3-ethoxy-4-methoxyphenyl)-1-phenylethyl)aniline (3ia)

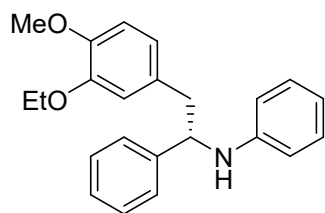

### HPLC Spectra of Chiral 3ia

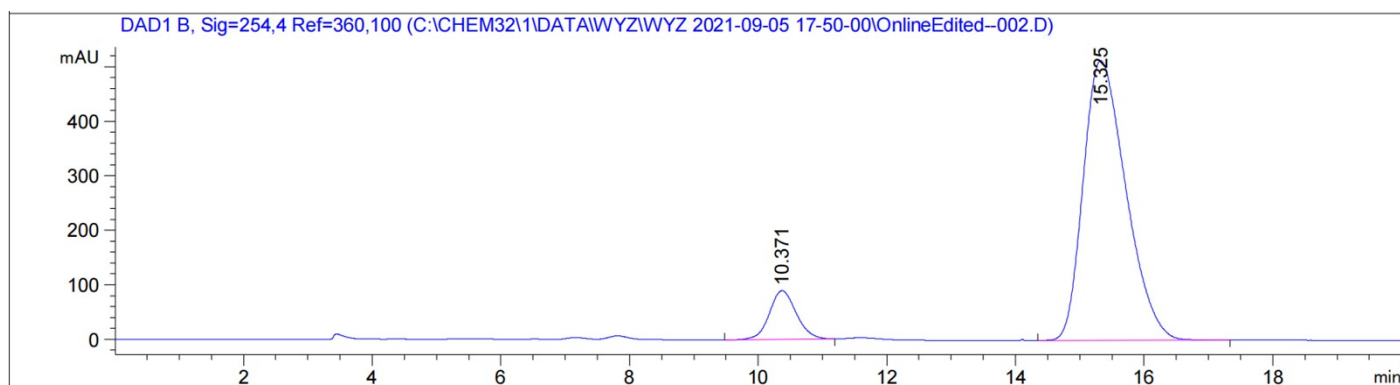

Signal 2: DAD1 B, Sig=254,4 Ref=360,100

| Peak # | RetTime [min] | Type | Width [min] | Area [mAU*s] | Area %  | Name |
|--------|---------------|------|-------------|--------------|---------|------|
| 1      | 10.371        | BB   | 0.4488      | 2618.36621   | 9.9718  | ?    |
| 2      | 15.325        | BB   | 0.7114      | 2.36392e4    | 90.0282 | ?    |

Totals : 2.62576e4

### HPLC Spectra of Racemic 3ia

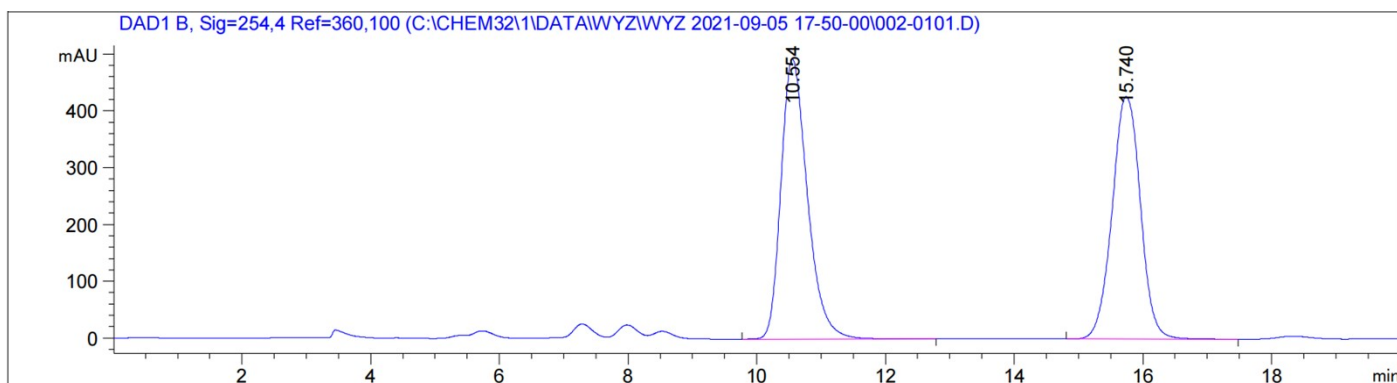

Signal 2: DAD1 B, Sig=254,4 Ref=360,100

| Peak # | RetTime [min] | Type | Width [min] | Area [mAU*s] | Area %  | Name |
|--------|---------------|------|-------------|--------------|---------|------|
| 1      | 10.554        | BB   | 0.4379      | 1.40232e4    | 51.8272 | ?    |
| 2      | 15.740        | BB   | 0.4724      | 1.30344e4    | 48.1728 | ?    |

Totals : 2.70577e4

### (S)-N-(2-(4-fluorophenyl)-1-phenylethyl)aniline (3ja)

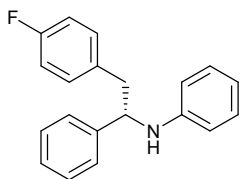

### HPLC Spectra of Chiral 3ja

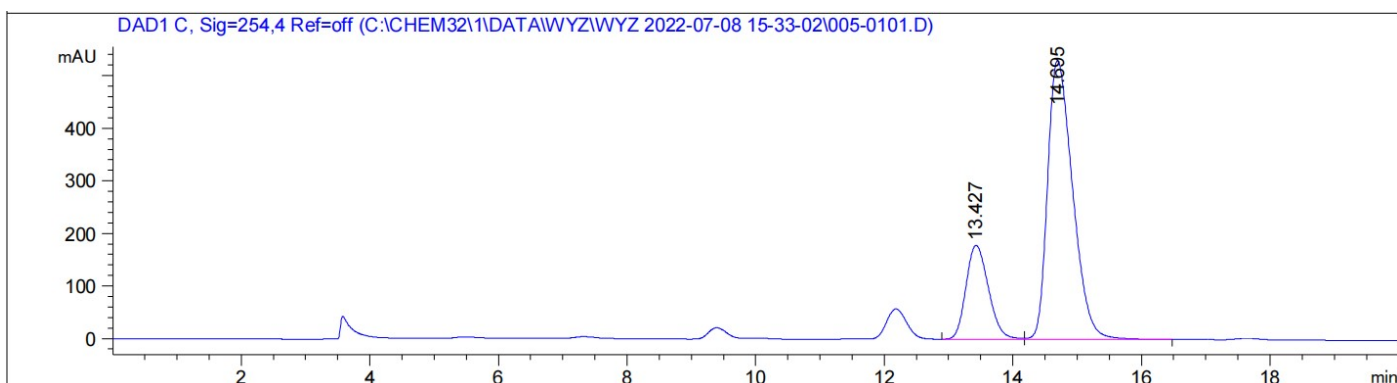

Signal 2: DAD1 C, Sig=254,4 Ref=off

| Peak # | RetTime [min] | Type | Width [min] | Area [mAU*s] | Height [mAU] | Area %  |
|--------|---------------|------|-------------|--------------|--------------|---------|
| 1      | 13.427        | BV   | 0.3796      | 4338.53320   | 178.45332    | 23.1891 |
| 2      | 14.695        | VB   | 0.4220      | 1.43708e4    | 530.54724    | 76.8109 |

Totals : 1.87094e4 709.00056

### HPLC Spectra of Racemic 3ja

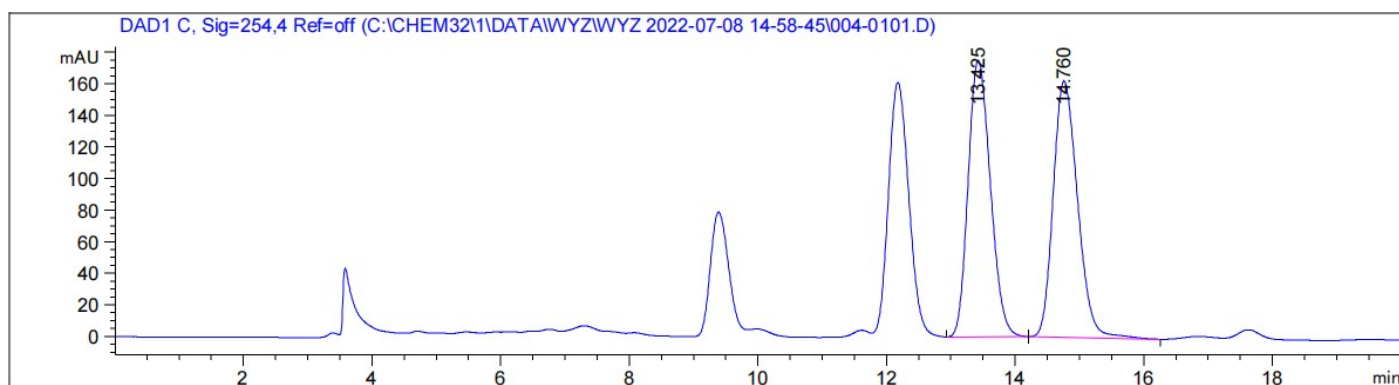

Signal 2: DAD1 C, Sig=254,4 Ref=off

| Peak # | RetTime [min] | Type | Width [min] | Area [mAU*s] | Height [mAU] | Area %  |
|--------|---------------|------|-------------|--------------|--------------|---------|
| 1      | 13.425        | BB   | 0.3761      | 4203.88086   | 175.08258    | 49.5717 |
| 2      | 14.760        | BB   | 0.4113      | 4276.52197   | 162.33228    | 50.4283 |

Totals : 8480.40283 337.41486

### (S)-N-(2-(3-chloro-4-methoxyphenyl)-1-phenylethyl)aniline (3ka)

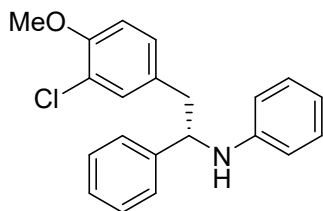

### HPLC Spectra of Chiral 3ka

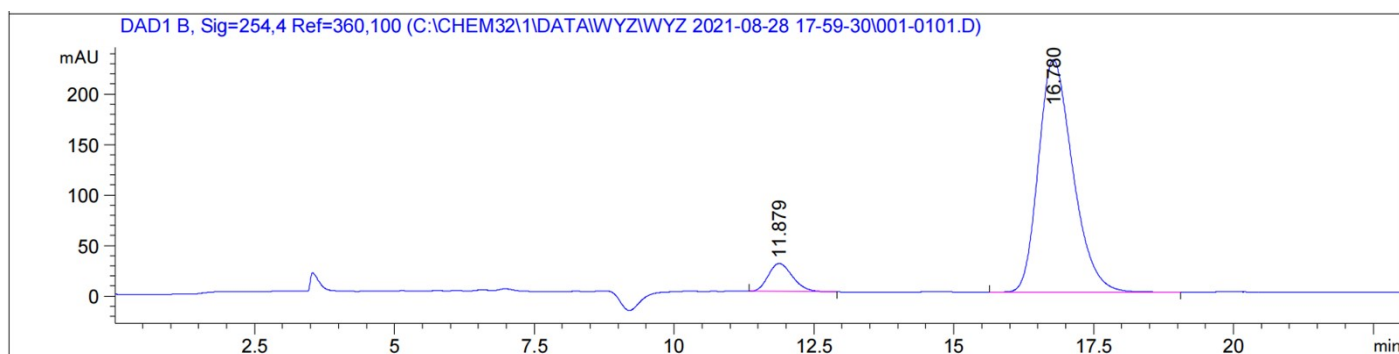

Signal 2: DAD1 B, Sig=254,4 Ref=360,100

| Peak # | RetTime [min] | Type | Width [min] | Area [mAU*s] | Area %  | Name |
|--------|---------------|------|-------------|--------------|---------|------|
| 1      | 11.879        | BB   | 0.4649      | 834.41772    | 7.8286  | ?    |
| 2      | 16.780        | BB   | 0.6559      | 9824.21875   | 92.1714 | ?    |

Totals : 1.06586e4

### HPLC Spectra of Racemic 3ka



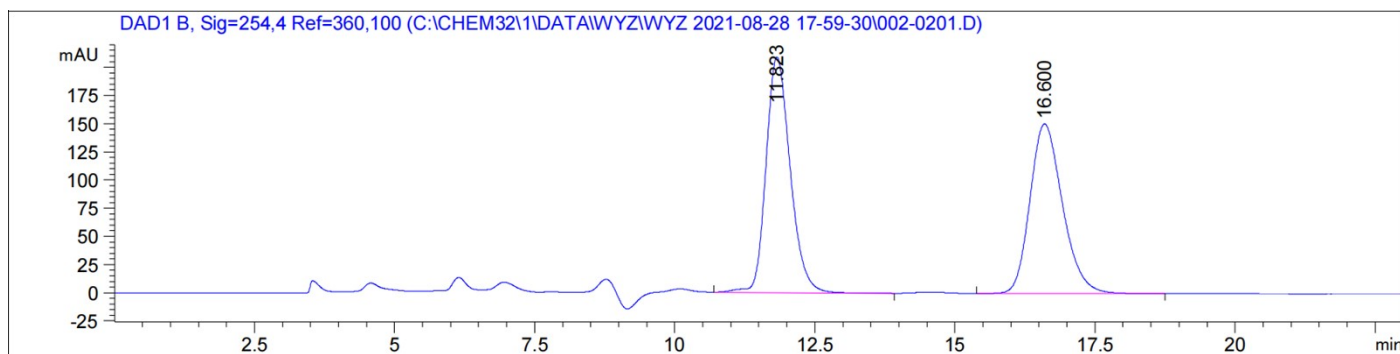

Signal 2: DAD1 B, Sig=254,4 Ref=360,100

| Peak # | RetTime [min] | Type | Width [min] | Area [mAU*s] | Area %  | Name |
|--------|---------------|------|-------------|--------------|---------|------|
| 1      | 11.823        | BB   | 0.4617      | 6261.45801   | 50.7255 | ?    |
| 2      | 16.600        | BB   | 0.6217      | 6082.34424   | 49.2745 | ?    |

Totals : 1.23438e4

**(S)-N-(2-(2-chloro-3-methoxyphenyl)-1-phenylethyl)aniline (3la)**

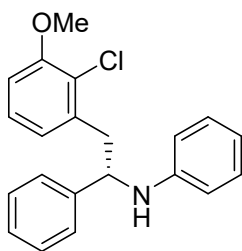

**HPLC Spectra of Chiral 3la**

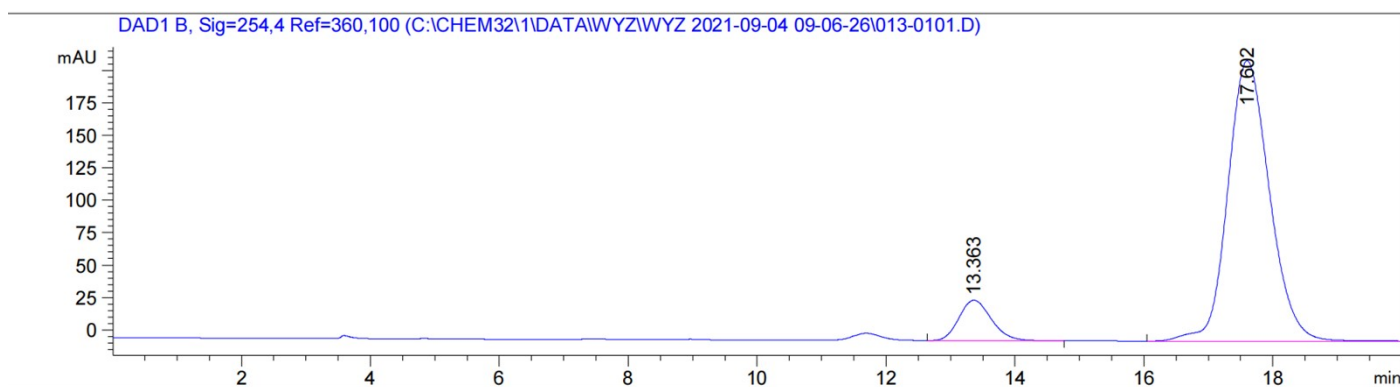

Signal 2: DAD1 B, Sig=254,4 Ref=360,100

| Peak # | RetTime [min] | Type | Width [min] | Area [mAU*s] | Area %  | Name |
|--------|---------------|------|-------------|--------------|---------|------|
| 1      | 13.363        | BB   | 0.5420      | 1090.99097   | 10.0955 | ?    |
| 2      | 17.602        | BBA  | 0.6962      | 9715.75098   | 89.9045 | ?    |

Totals : 1.08067e4

**HPLC Spectra of Racemic 3la**

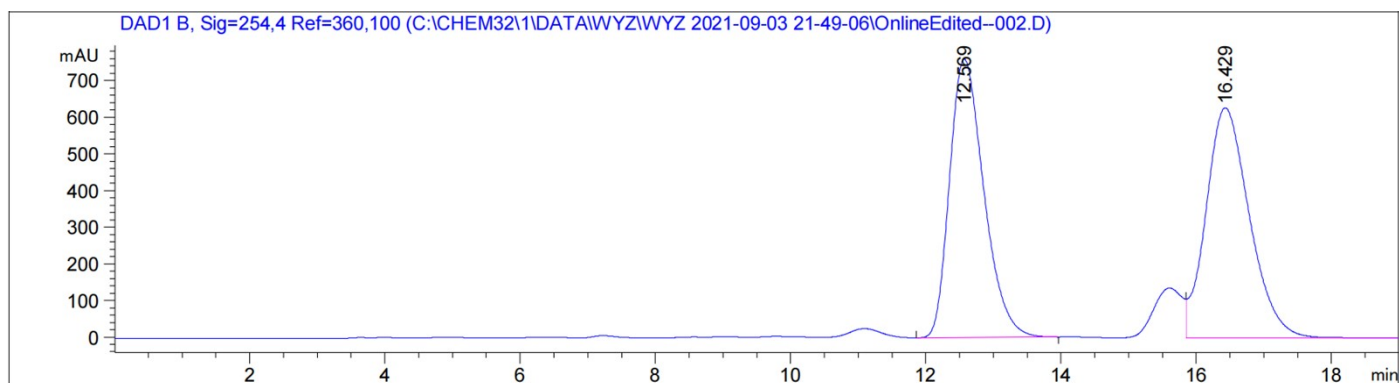

Signal 2: DAD1 B, Sig=254,4 Ref=360,100

| Peak # | RetTime [min] | Type | Width [min] | Area [mAU*s] | Area %  | Name |
|--------|---------------|------|-------------|--------------|---------|------|
| 1      | 12.569        | BB   | 0.5448      | 2.67851e4    | 48.8066 | ?    |
| 2      | 16.429        | VBA  | 0.6856      | 2.80950e4    | 51.1934 | ?    |

Totals : 5.48801e4

### (S)-N-(2-(furan-2-yl)-1-phenylethyl)aniline (3ma)

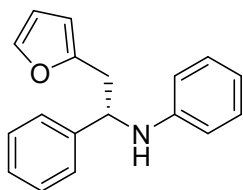

### HPLC Spectra of Chiral 3ma

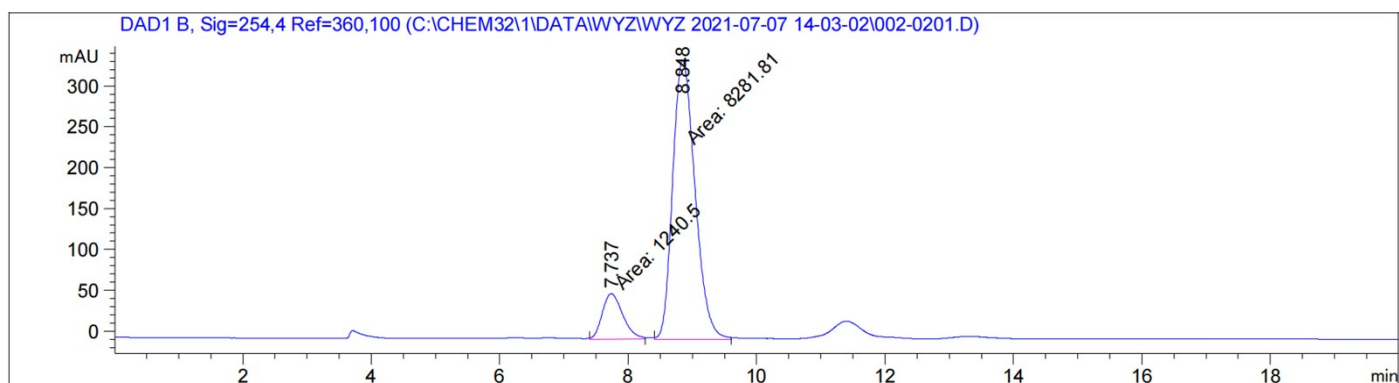

Signal 2: DAD1 B, Sig=254,4 Ref=360,100

| Peak # | RetTime [min] | Type | Width [min] | Area [mAU*s] | Area %  | Name |
|--------|---------------|------|-------------|--------------|---------|------|
| 1      | 7.737         | MM   | 0.3708      | 1240.49646   | 13.0273 | ?    |
| 2      | 8.848         | MM   | 0.4031      | 8281.80957   | 86.9727 | ?    |

Totals : 9522.30603

### HPLC Spectra of Racemic 3ma

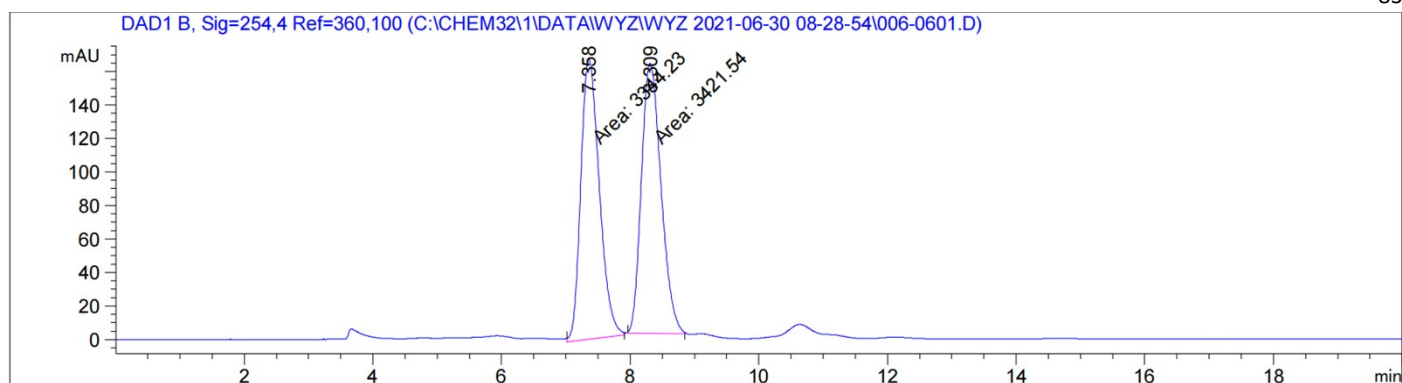

Signal 2: DAD1 B, Sig=254,4 Ref=360,100

| Peak # | RetTime [min] | Type | Width [min] | Area [mAU*s] | Area %  | Name |
|--------|---------------|------|-------------|--------------|---------|------|
| 1      | 7.358         | MM   | 0.3334      | 3344.22607   | 49.4287 | ?    |
| 2      | 8.309         | MM   | 0.3537      | 3421.53662   | 50.5713 | ?    |

Totals : 6765.76270

### (S)-N-(1-phenyl-2-(thiophen-2-yl)ethyl)aniline (3na)



### HPLC Spectra of Chiral 3na

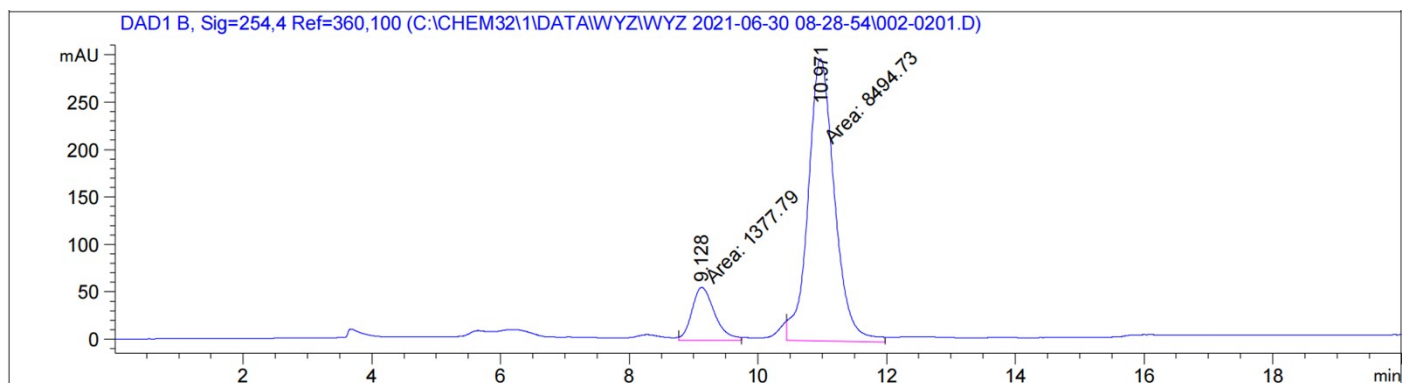

Signal 2: DAD1 B, Sig=254,4 Ref=360,100

| Peak # | RetTime [min] | Type | Width [min] | Area [mAU*s] | Area %  | Name |
|--------|---------------|------|-------------|--------------|---------|------|
| 1      | 9.128         | MM   | 0.4107      | 1377.79016   | 13.9558 | ?    |
| 2      | 10.971        | MM   | 0.4758      | 8494.73145   | 86.0442 | ?    |

Totals : 9872.52161

### HPLC Spectra of Racemic 3na

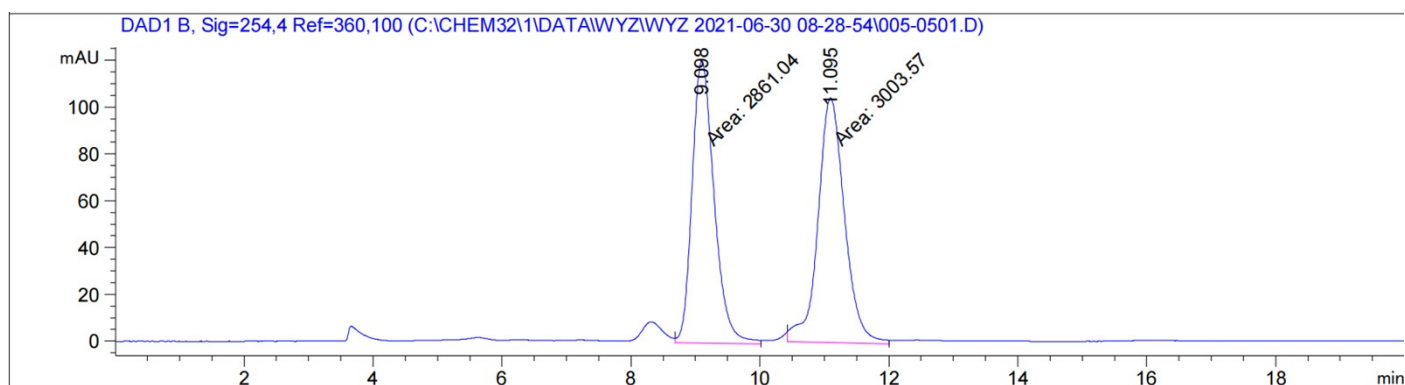

Signal 2: DAD1 B, Sig=254,4 Ref=360,100

| Peak # | RetTime [min] | Type | Width [min] | Area [mAU*s] | Area %  | Name |
|--------|---------------|------|-------------|--------------|---------|------|
| 1      | 9.098         | MM   | 0.3955      | 2861.04370   | 48.7849 | ?    |
| 2      | 11.095        | MM   | 0.4783      | 3003.56982   | 51.2151 | ?    |

Totals : 5864.61353

### (S)-N-(1-phenylheptyl)aniline (30a)

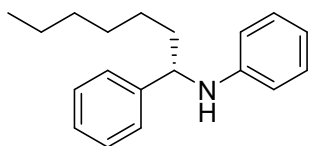

### HPLC Spectra of Chiral 30a

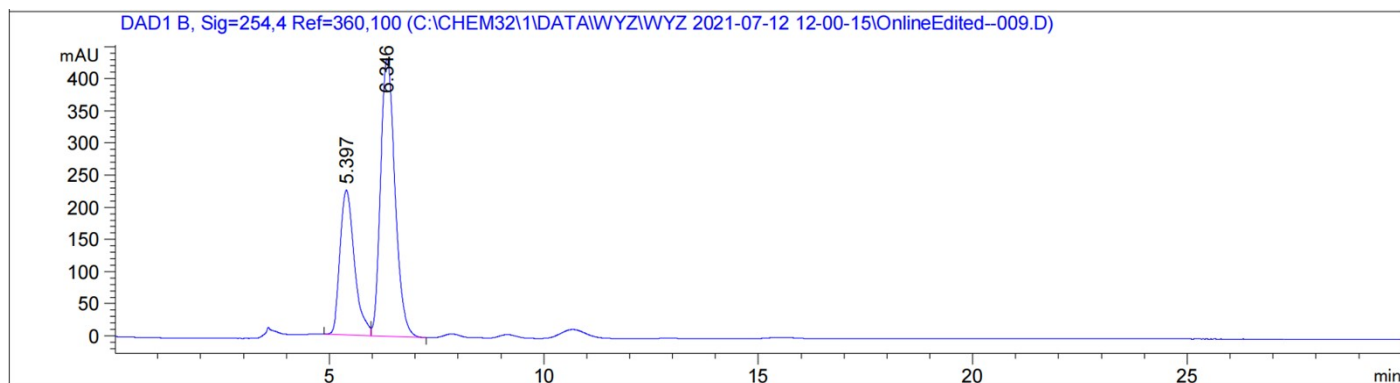

Signal 2: DAD1 B, Sig=254,4 Ref=360,100

| Peak # | RetTime [min] | Type | Width [min] | Area [mAU*s] | Height [mAU] | Area %  |
|--------|---------------|------|-------------|--------------|--------------|---------|
| 1      | 5.397         | BV   | 0.3657      | 5288.68164   | 225.47072    | 34.3003 |
| 2      | 6.346         | VB   | 0.3696      | 1.01301e4    | 431.90103    | 65.6997 |

Totals : 1.54188e4 657.37175

### HPLC Spectra of Racemic 30a

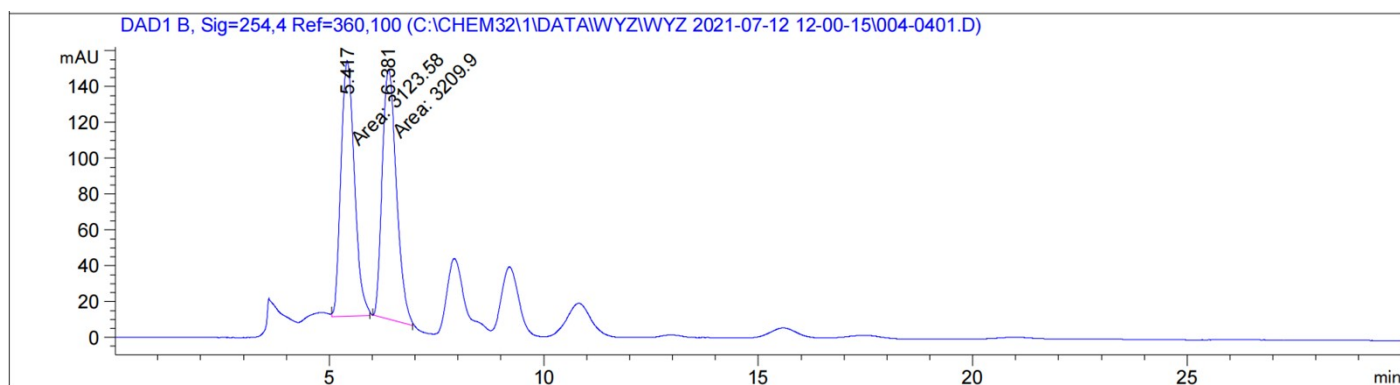

Signal 2: DAD1 B, Sig=254,4 Ref=360,100

| Peak # | RetTime [min] | Type | Width [min] | Area [mAU*s] | Height [mAU] | Area %  |
|--------|---------------|------|-------------|--------------|--------------|---------|
| 1      | 5.417         | MM   | 0.3648      | 3123.58154   | 142.71191    | 49.3185 |
| 2      | 6.381         | MM   | 0.3841      | 3209.90308   | 139.29749    | 50.6815 |

Totals : 6333.48462 282.00940

**(S)-N-(1-(4-fluorophenyl)-2-phenylethyl)aniline (3ab)**

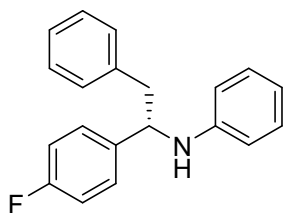

**HPLC Spectra of Chiral 3ab**

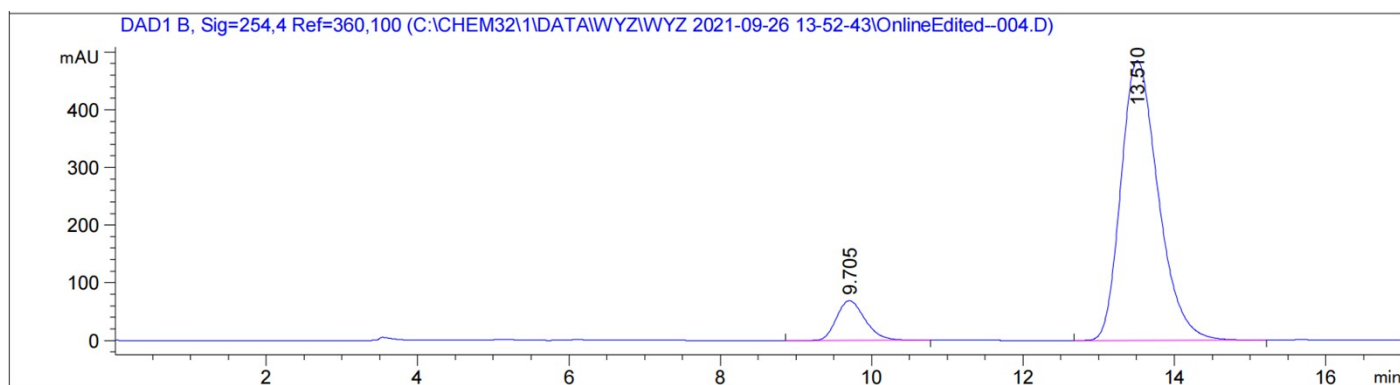

Signal 2: DAD1 B, Sig=254,4 Ref=360,100

| Peak # | RetTime [min] | Type | Width [min] | Area [mAU*s] | Area %  | Name |
|--------|---------------|------|-------------|--------------|---------|------|
| 1      | 9.705         | BB   | 0.4079      | 1805.39014   | 9.8013  | ?    |
| 2      | 13.510        | BB   | 0.5296      | 1.66144e4    | 90.1987 | ?    |

Totals : 1.84198e4

**HPLC Spectra of Racemic 3ab**

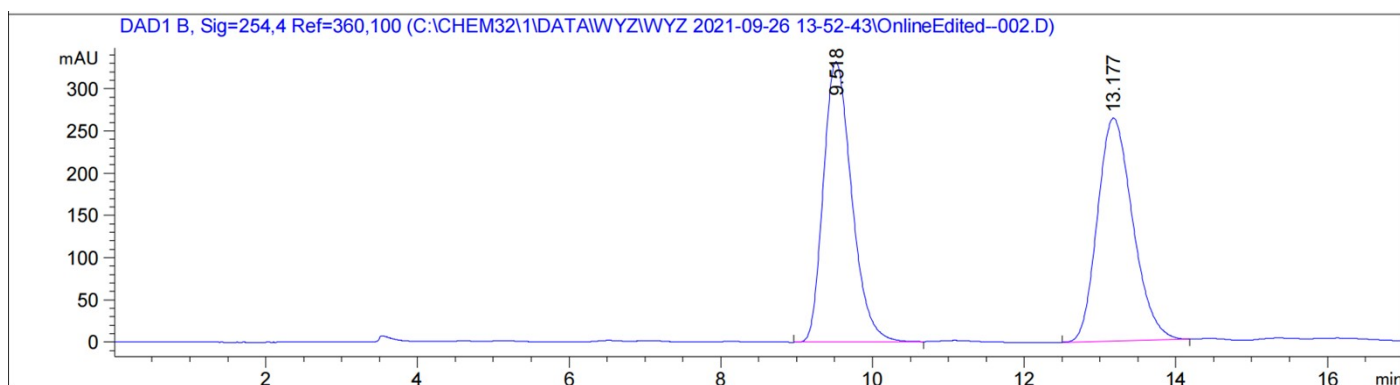

Signal 2: DAD1 B, Sig=254,4 Ref=360,100

| Peak # | RetTime [min] | Type | Width [min] | Area [mAU*s] | Area %  | Name |
|--------|---------------|------|-------------|--------------|---------|------|
| 1      | 9.518         | BB   | 0.4044      | 8603.94336   | 50.2281 | ?    |
| 2      | 13.177        | BB   | 0.5029      | 8525.80371   | 49.7719 | ?    |

Totals : 1.71297e4

**(S)-N-(1-(4-bromophenyl)-2-phenylethyl)aniline (3ac)**

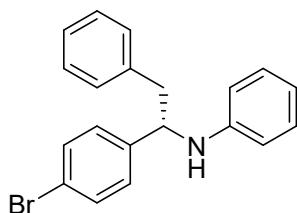

**HPLC Spectra of Chiral 3ac**

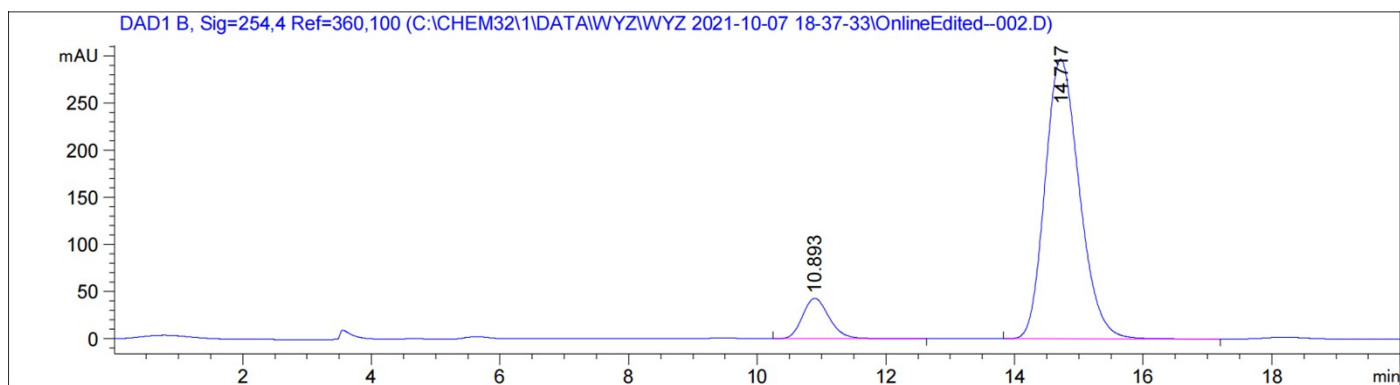

Signal 2: DAD1 B, Sig=254,4 Ref=360,100

| Peak # | RetTime [min] | Type | Width [min] | Area [mAU*s] | Area %  | Name |
|--------|---------------|------|-------------|--------------|---------|------|
| 1      | 10.893        | BB   | 0.4457      | 1234.72742   | 10.0766 | ?    |
| 2      | 14.717        | BB   | 0.5743      | 1.10186e4    | 89.9234 | ?    |

Totals : 1.22534e4

**HPLC Spectra of Racemic 3ac**

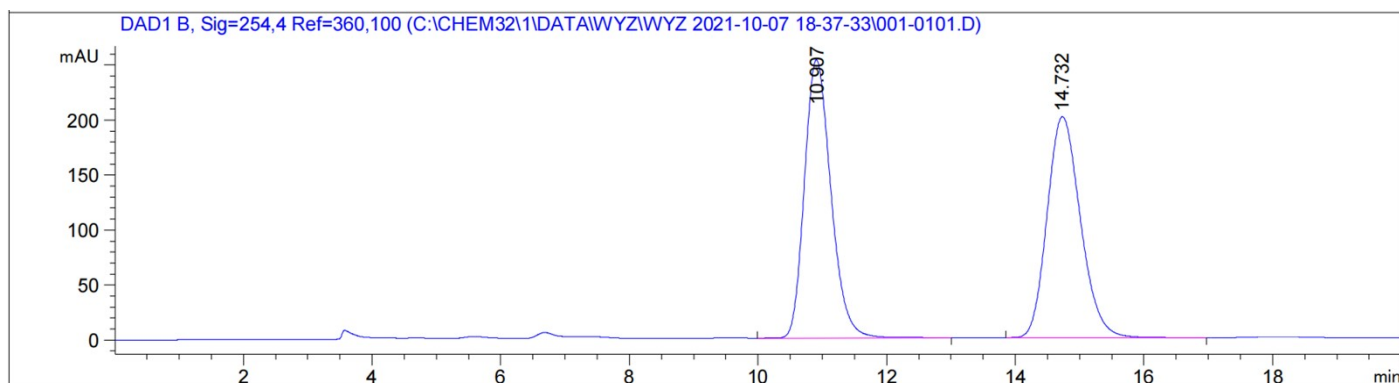

Signal 2: DAD1 B, Sig=254,4 Ref=360,100

| Peak # | RetTime [min] | Type | Width [min] | Area [mAU*s] | Area %  | Name |
|--------|---------------|------|-------------|--------------|---------|------|
| 1      | 10.907        | BB   | 0.4435      | 7234.68457   | 50.0203 | ?    |
| 2      | 14.732        | BB   | 0.5574      | 7228.80859   | 49.9797 | ?    |

Totals : 1.44635e4

### (S)-N-(1-(4-iodophenyl)-2-phenylethyl)aniline (3ad)

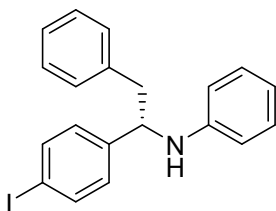

### HPLC Spectra of Chiral 3ad

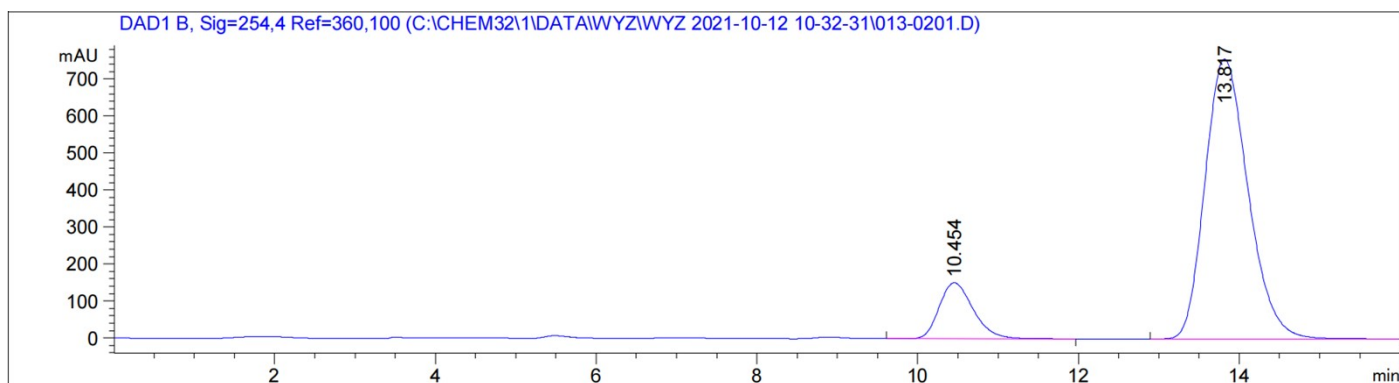

Signal 2: DAD1 B, Sig=254,4 Ref=360,100

| Peak # | RetTime [min] | Type | Width [min] | Area [mAU*s] | Height [mAU] | Area %  |
|--------|---------------|------|-------------|--------------|--------------|---------|
| 1      | 10.454        | BB   | 0.4561      | 4436.89844   | 151.31656    | 13.6369 |
| 2      | 13.817        | BBA  | 0.5793      | 2.80991e4    | 756.57672    | 86.3631 |

Totals : 3.25360e4 907.89328

### HPLC Spectra of Racemic 3ad

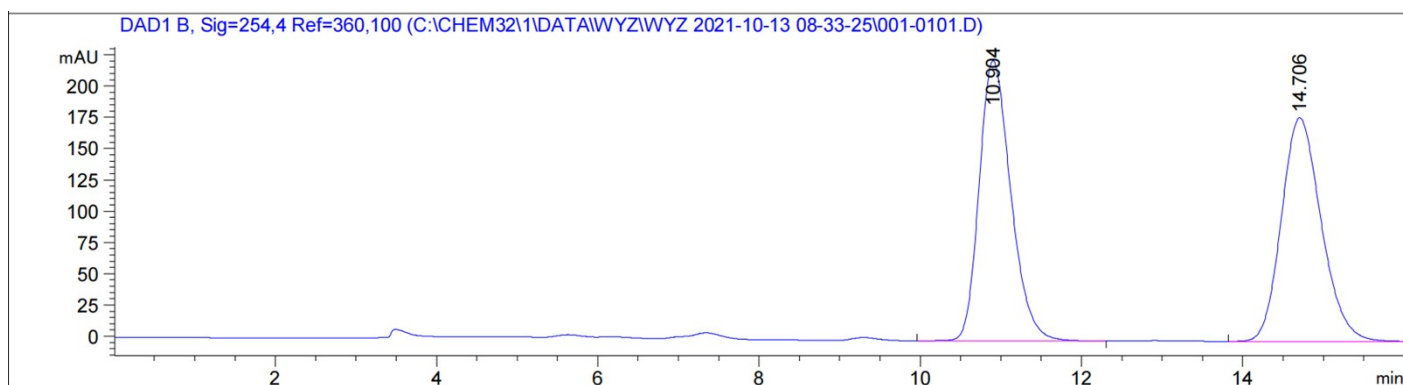

Signal 2: DAD1 B, Sig=254,4 Ref=360,100

| Peak # | RetTime [min] | Type | Width [min] | Area [mAU*s] | Area %  | Name |
|--------|---------------|------|-------------|--------------|---------|------|
| 1      | 10.904        | BB   | 0.4208      | 6122.90723   | 49.9847 | ?    |
| 2      | 14.706        | BBA  | 0.5299      | 6126.65527   | 50.0153 | ?    |

Totals : 1.22496e4

**(S)-N-(2-phenyl-1-(4-(trifluoromethyl)phenyl)ethyl)aniline (3ae)**

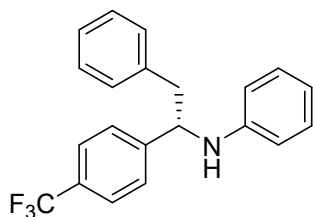

**HPLC Spectra of Chiral 3ae**

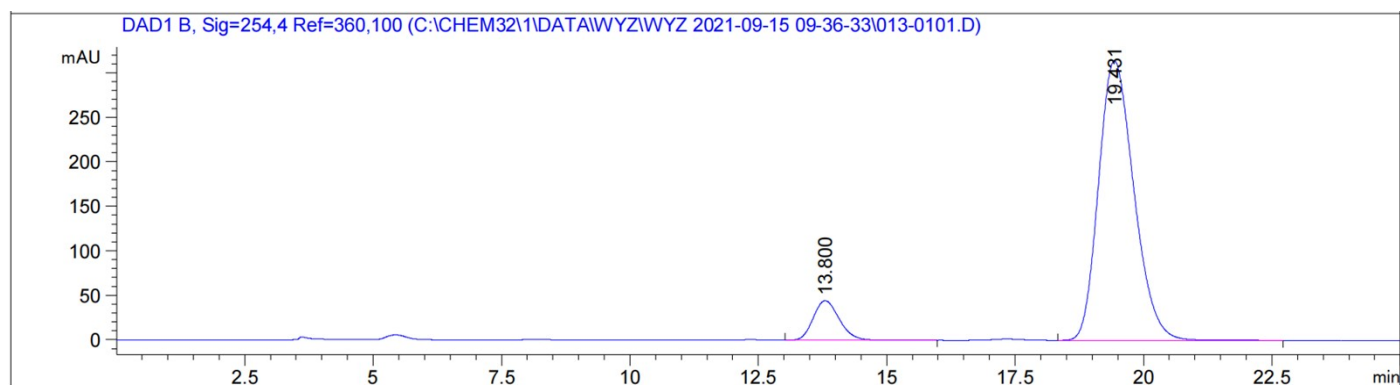

Signal 2: DAD1 B, Sig=254,4 Ref=360,100

| Peak # | RetTime [min] | Type | Width [min] | Area [mAU*s] | Area %  | Name |
|--------|---------------|------|-------------|--------------|---------|------|
| 1      | 13.800        | BB   | 0.5450      | 1566.49207   | 9.4383  | ?    |
| 2      | 19.431        | BB   | 0.7437      | 1.50307e4    | 90.5617 | ?    |

Totals : 1.65972e4

**HPLC Spectra of Racemic 3ae**



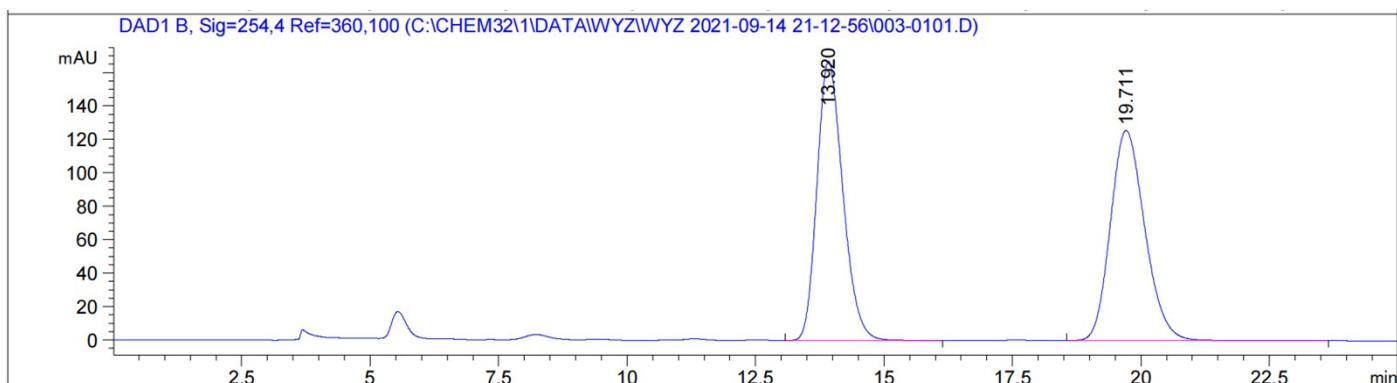

Signal 2: DAD1 B, Sig=254,4 Ref=360,100

| Peak # | RetTime [min] | Type | Width [min] | Area [mAU*s] | Area %  | Name |
|--------|---------------|------|-------------|--------------|---------|------|
| 1      | 13.920        | BB   | 0.5424      | 5846.78613   | 50.0027 | ?    |
| 2      | 19.711        | BB   | 0.7166      | 5846.15430   | 49.9973 | ?    |

Totals : 1.16929e4

**(S)-N-(2-phenyl-1-(4-(trifluoromethoxy)phenyl)ethyl)aniline (3af)**

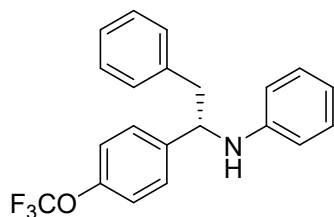

**HPLC Spectra of Chiral 3af**

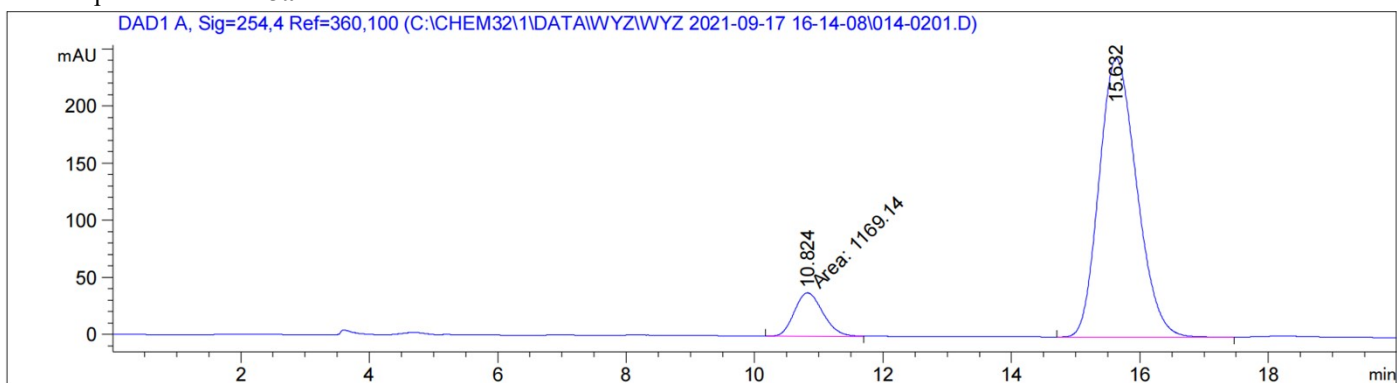

Signal 1: DAD1 A, Sig=254,4 Ref=360,100

| Peak # | RetTime [min] | Type | Width [min] | Area [mAU*s] | Height [mAU] | Area %  |
|--------|---------------|------|-------------|--------------|--------------|---------|
| 1      | 10.824        | MF   | 0.5142      | 1169.14233   | 37.89658     | 10.5588 |
| 2      | 15.632        | BB   | 0.6363      | 9903.50586   | 243.62817    | 89.4412 |

Totals : 1.10726e4 281.52476

**HPLC Spectra of Racemic 3af**

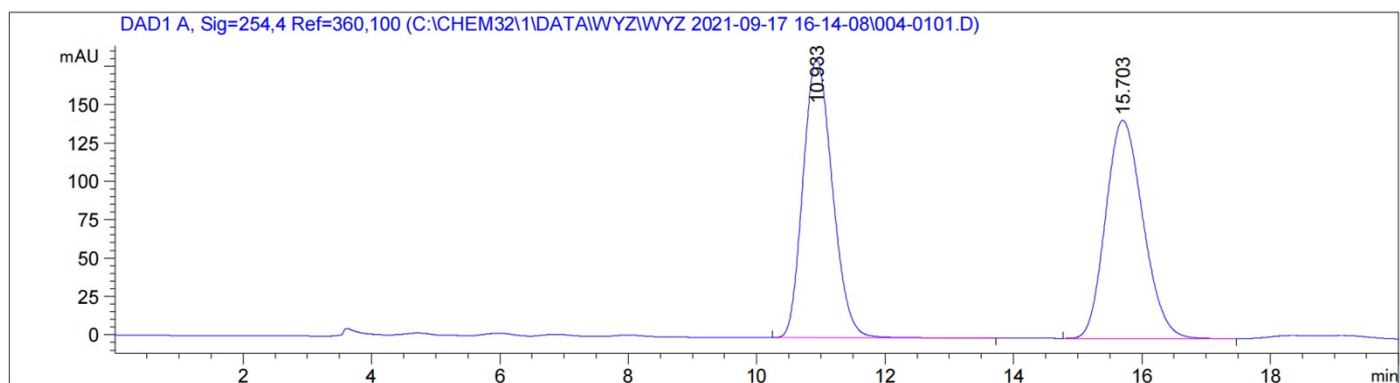

Signal 1: DAD1 A, Sig=254,4 Ref=360,100

| Peak # | RetTime [min] | Type | Width [min] | Area [mAU*s] | Height [mAU] | Area %  |
|--------|---------------|------|-------------|--------------|--------------|---------|
| 1      | 10.933        | BB   | 0.4967      | 5760.39990   | 181.27107    | 50.0311 |
| 2      | 15.703        | BB   | 0.6342      | 5753.24414   | 142.15414    | 49.9689 |

Totals : 1.15136e4 323.42522

(S)-N-(1-(4-methoxyphenyl)-2-phenylethyl)aniline (3ag)

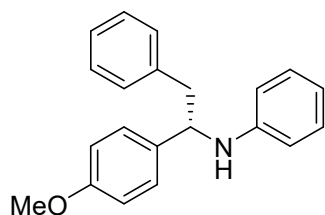

HPLC Spectra of Chiral 3ag

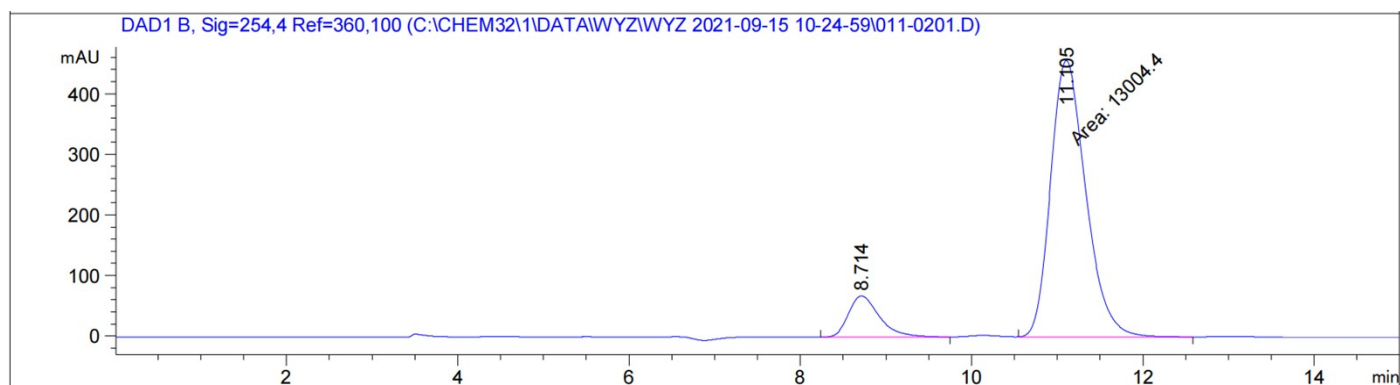

Signal 2: DAD1 B, Sig=254,4 Ref=360,100

| Peak # | RetTime [min] | Type | Width [min] | Area [mAU*s] | Area %  | Name |
|--------|---------------|------|-------------|--------------|---------|------|
| 1      | 8.714         | BB   | 0.3811      | 1695.64783   | 11.5349 | ?    |
| 2      | 11.105        | FM   | 0.4753      | 1.30044e4    | 88.4651 | ?    |

Totals : 1.47001e4

HPLC Spectra of Racemic 3ag

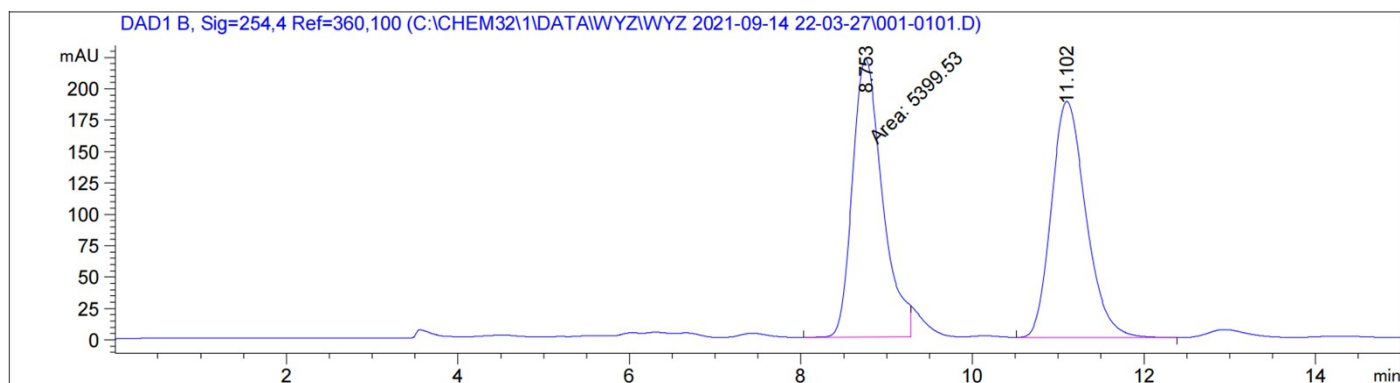

Signal 2: DAD1 B, Sig=254,4 Ref=360,100

| Peak # | RetTime [min] | Type | Width [min] | Area [mAU*s] | Area %  | Name |
|--------|---------------|------|-------------|--------------|---------|------|
| 1      | 8.753         | MF   | 0.4057      | 5399.52588   | 50.5932 | ?    |
| 2      | 11.102        | BB   | 0.4329      | 5272.90576   | 49.4068 | ?    |

Totals : 1.06724e4

### (S)-N-(2-phenyl-1-(p-tolyl)ethyl)aniline (3ah)

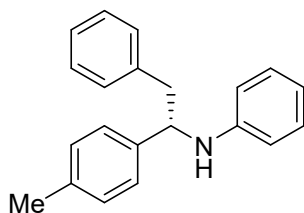

### HPLC Spectra of Chiral 3ah

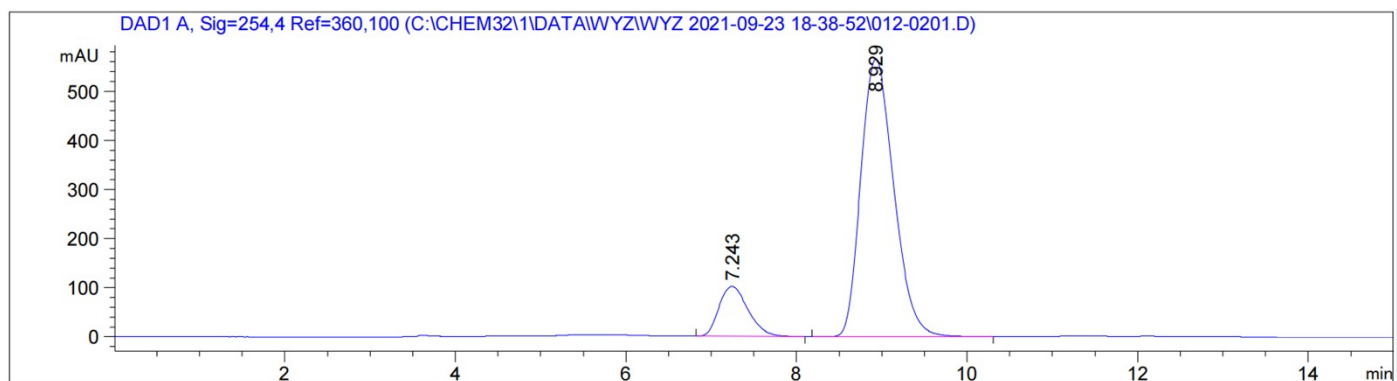

Signal 1: DAD1 A, Sig=254,4 Ref=360,100

| Peak # | RetTime [min] | Type | Width [min] | Area [mAU*s] | Area %  | Name |
|--------|---------------|------|-------------|--------------|---------|------|
| 1      | 7.243         | BB   | 0.3723      | 2402.28442   | 13.6834 | ?    |
| 2      | 8.929         | BB   | 0.4206      | 1.51539e4    | 86.3166 | ?    |

Totals : 1.75562e4

### HPLC Spectra of Racemic 3ah

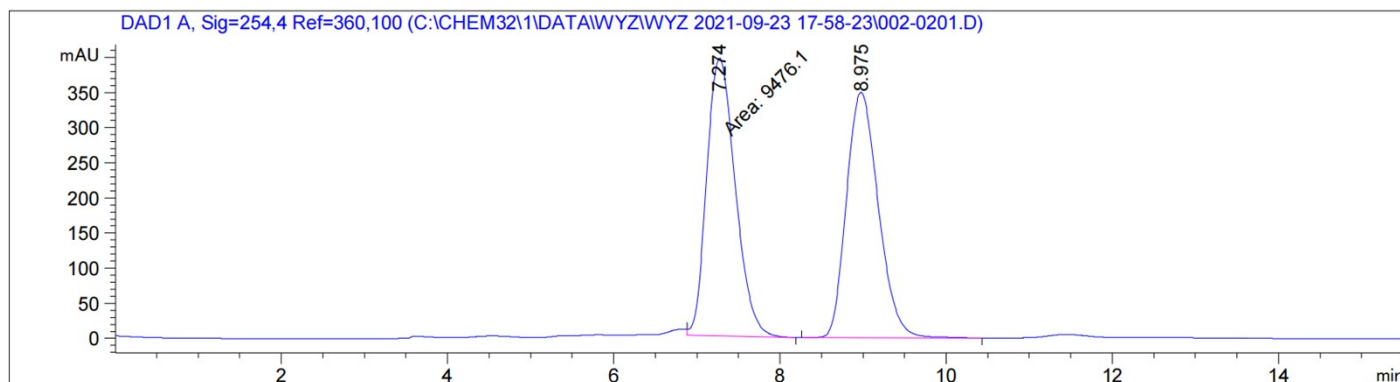

Signal 1: DAD1 A, Sig=254,4 Ref=360,100

| Peak # | RetTime [min] | Type | Width [min] | Area [mAU*s] | Area %  | Name |
|--------|---------------|------|-------------|--------------|---------|------|
| 1      | 7.274         | FM   | 0.3992      | 9476.09668   | 50.4104 | ?    |
| 2      | 8.975         | BB   | 0.4175      | 9321.81836   | 49.5896 | ?    |

Totals : 1.87979e4

**(S)-N-(2-phenyl-1-(2-(trifluoromethyl)phenyl)ethyl)aniline (3ai)**

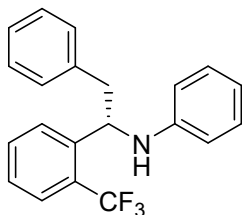

**HPLC Spectra of Chiral 3ai**

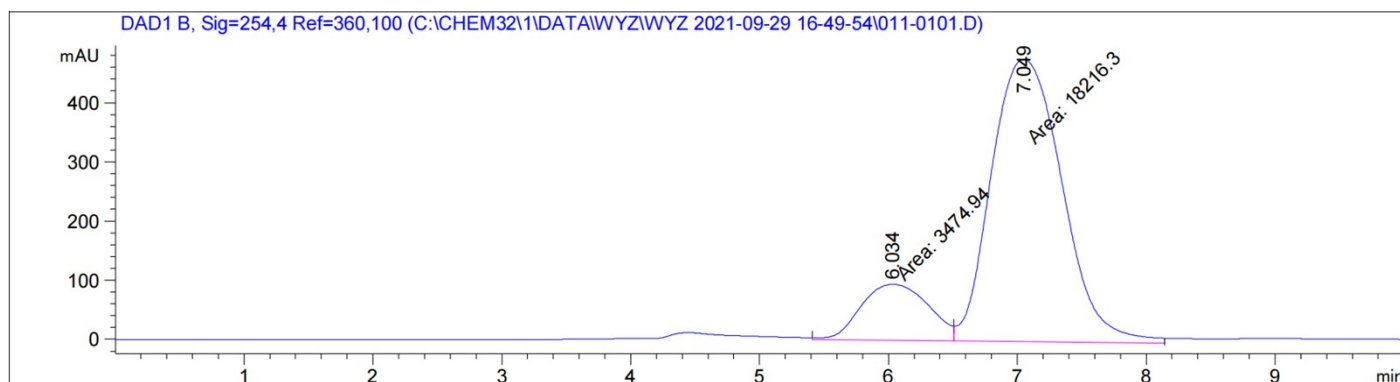

Signal 2: DAD1 B, Sig=254,4 Ref=360,100

| Peak # | RetTime [min] | Type | Width [min] | Area [mAU*s] | Area %  | Name |
|--------|---------------|------|-------------|--------------|---------|------|
| 1      | 6.034         | MF   | 0.6089      | 3474.93555   | 16.0200 | ?    |
| 2      | 7.049         | FM   | 0.6353      | 1.82163e4    | 83.9800 | ?    |

Totals : 2.16912e4

**HPLC Spectra of Racemic 3ai**

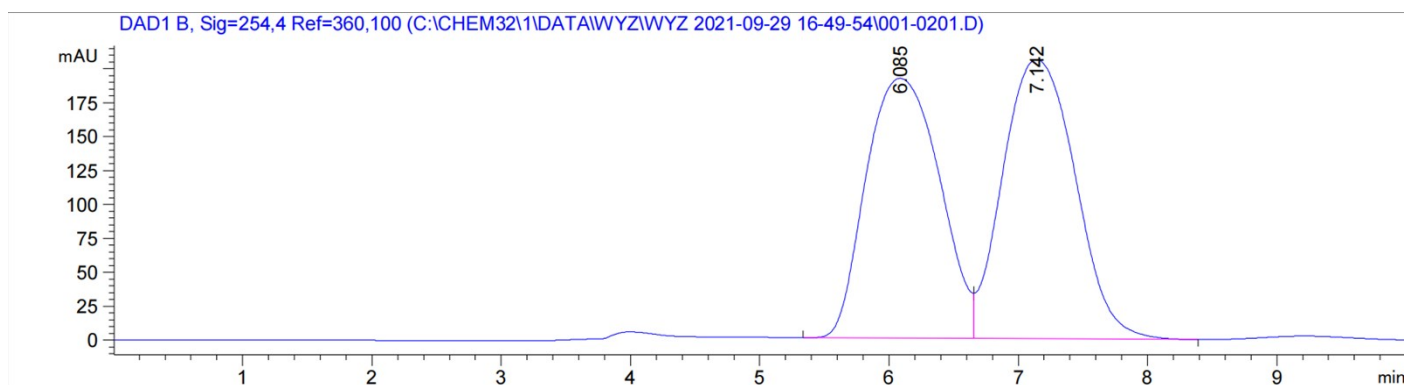

Signal 2: DAD1 B, Sig=254,4 Ref=360,100

| Peak # | RetTime [min] | Type | Width [min] | Area [mAU*s] | Area %  | Name |
|--------|---------------|------|-------------|--------------|---------|------|
| 1      | 6.085         | BV   | 0.6597      | 7578.36621   | 48.5481 | ?    |
| 2      | 7.142         | VB   | 0.6351      | 8031.65576   | 51.4519 | ?    |

Totals : 1.56100e4

**(S)-N-(1-(3-fluorophenyl)-2-phenylethyl)aniline (3aj)**

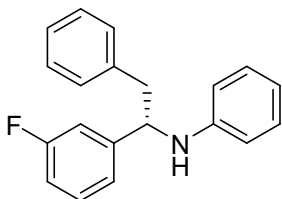

**HPLC Spectra of Chiral 3aj**

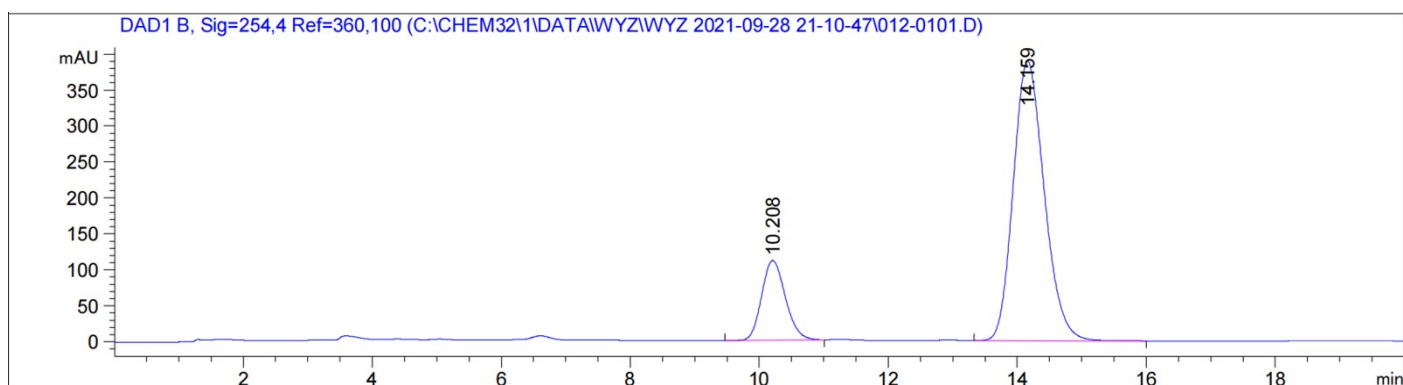

Signal 2: DAD1 B, Sig=254,4 Ref=360,100

| Peak # | RetTime [min] | Type | Width [min] | Area [mAU*s] | Height [mAU] | Area %  |
|--------|---------------|------|-------------|--------------|--------------|---------|
| 1      | 10.208        | BB   | 0.3981      | 2828.20239   | 110.69870    | 17.9193 |
| 2      | 14.159        | BB   | 0.5189      | 1.29548e4    | 388.65002    | 82.0807 |

Totals : 1.57830e4 499.34872

**HPLC Spectra of Racemic 3aj**

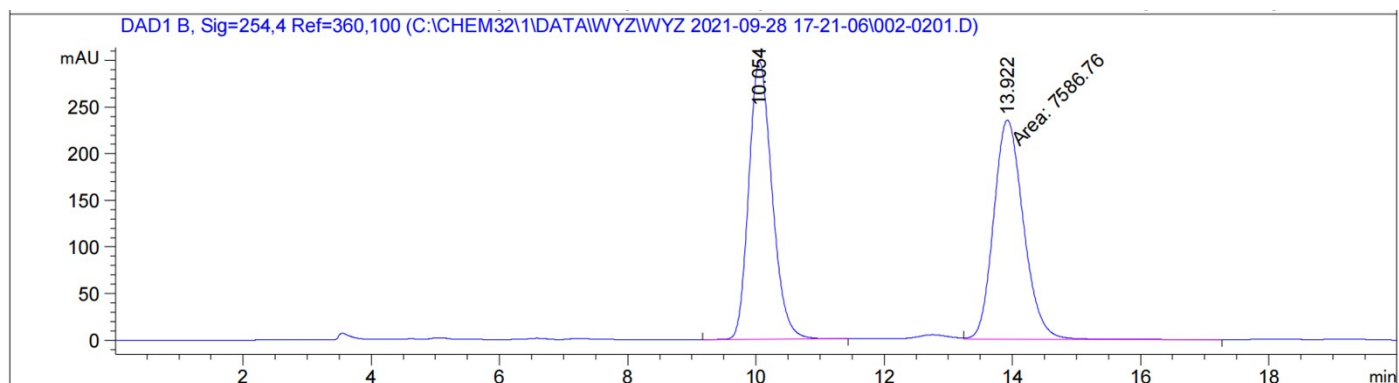

Signal 2: DAD1 B, Sig=254,4 Ref=360,100

| Peak # | RetTime [min] | Type | Width [min] | Area [mAU*s] | Height [mAU] | Area %  |
|--------|---------------|------|-------------|--------------|--------------|---------|
| 1      | 10.054        | BB   | 0.3928      | 7541.97363   | 298.50449    | 49.8520 |
| 2      | 13.922        | FM   | 0.5377      | 7586.76465   | 235.17218    | 50.1480 |

Totals : 1.51287e4 533.67667

**(S)-N-(1-(3-bromophenyl)-2-phenylethyl)aniline (3ak)**

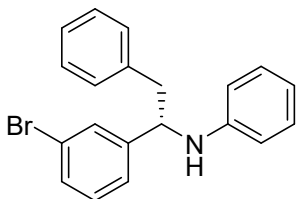

**HPLC Spectra of Chiral 3ak**

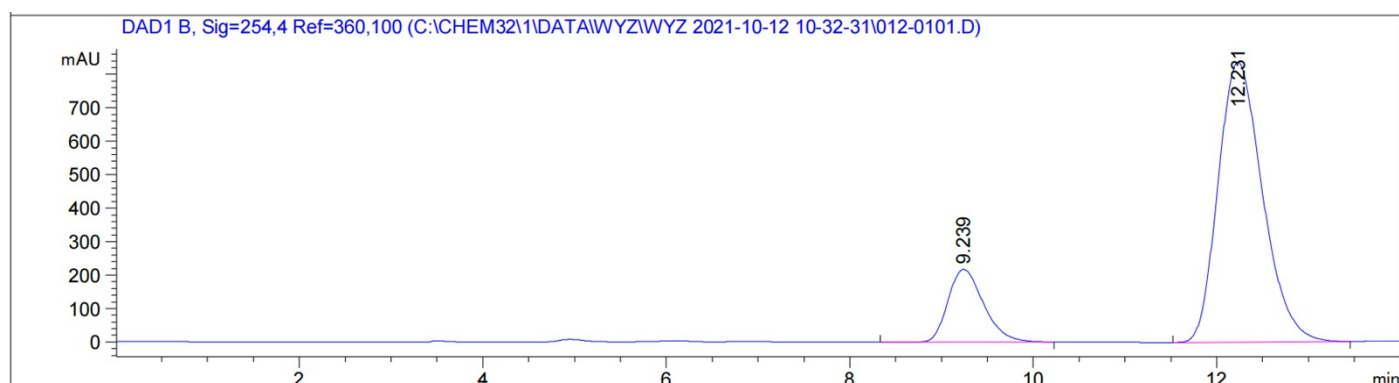

Signal 2: DAD1 B, Sig=254,4 Ref=360,100

| Peak # | RetTime [min] | Type | Width [min] | Area [mAU*s] | Height [mAU] | Area %  |
|--------|---------------|------|-------------|--------------|--------------|---------|
| 1      | 9.239         | BB   | 0.4187      | 5863.01025   | 217.36635    | 17.2579 |
| 2      | 12.231        | BB   | 0.5264      | 2.81099e4    | 835.72778    | 82.7421 |

Totals : 3.39729e4 1053.09413

**HPLC Spectra of Racemic 3ak**

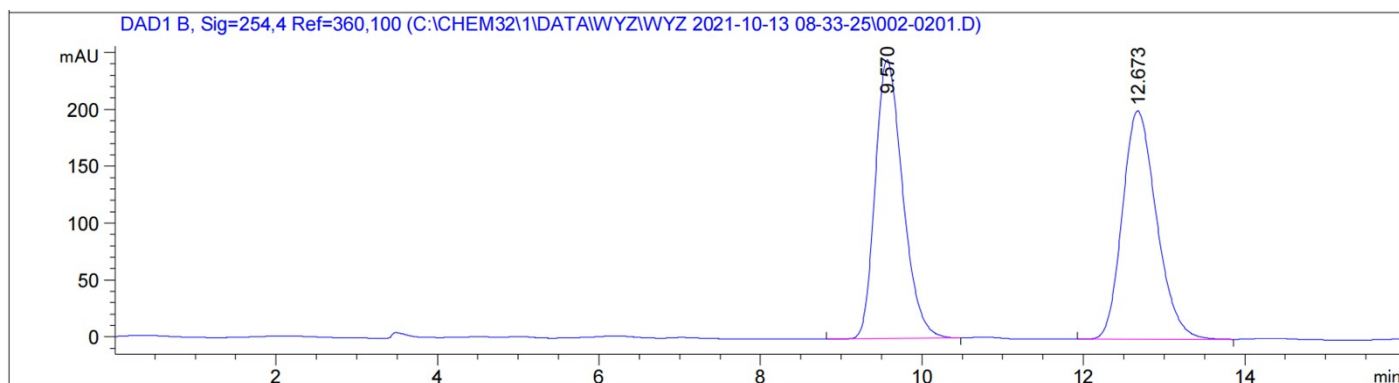

Signal 2: DAD1 B, Sig=254,4 Ref=360,100

| Peak # | RetTime [min] | Type | Width [min] | Area [mAU*s] | Area %  | Name |
|--------|---------------|------|-------------|--------------|---------|------|
| 1      | 9.570         | BB   | 0.3665      | 5809.09570   | 49.5891 | ?    |
| 2      | 12.673        | BB   | 0.4532      | 5905.37402   | 50.4109 | ?    |

Totals : 1.17145e4

**(S)-N-(1-(3-chloro-4-fluorophenyl)-2-phenylethyl)aniline (3a1)**

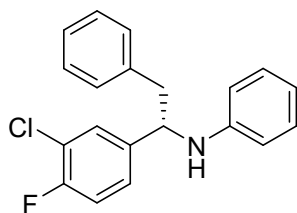

**HPLC Spectra of Chiral 3a1**

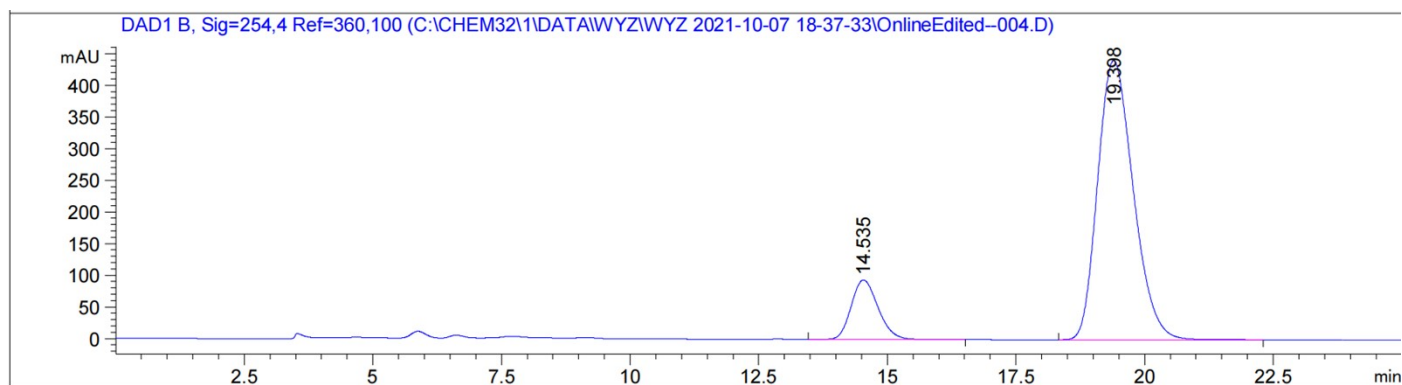

Signal 2: DAD1 B, Sig=254,4 Ref=360,100

| Peak # | RetTime [min] | Type | Width [min] | Area [mAU*s] | Area %  | Name |
|--------|---------------|------|-------------|--------------|---------|------|
| 1      | 14.535        | BB   | 0.5651      | 3430.31201   | 13.9267 | ?    |
| 2      | 19.398        | BB   | 0.7506      | 2.12008e4    | 86.0733 | ?    |

Totals : 2.46311e4

**HPLC Spectra of Racemic 3a1**

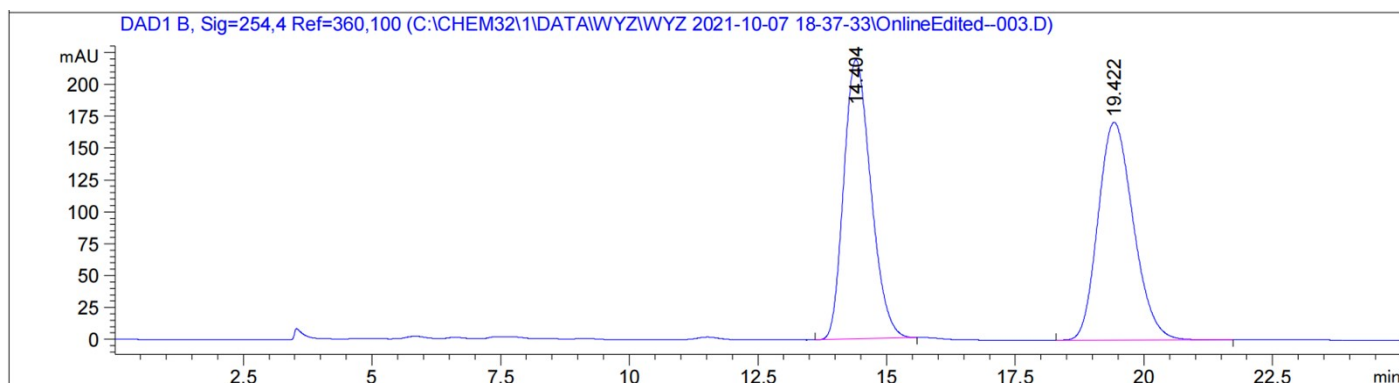

Signal 2: DAD1 B, Sig=254,4 Ref=360,100

| Peak # | RetTime [min] | Type | Width [min] | Area [mAU*s] | Area %  | Name |
|--------|---------------|------|-------------|--------------|---------|------|
| 1      | 14.404        | BB   | 0.5710      | 8019.70117   | 49.6328 | ?    |
| 2      | 19.422        | BB   | 0.7437      | 8138.36865   | 50.3672 | ?    |

Totals : 1.61581e4

**(S)-N-(1-(naphthalen-2-yl)-2-phenylethyl)aniline (3am)**

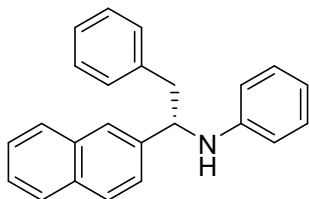

**HPLC Spectra of Chiral 3am**

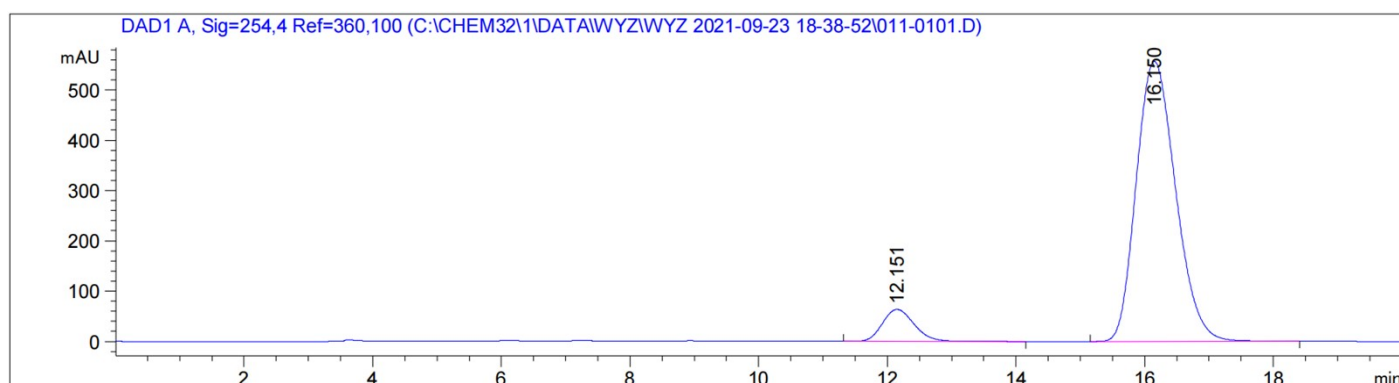

Signal 1: DAD1 A, Sig=254,4 Ref=360,100

| Peak # | RetTime [min] | Type | Width [min] | Area [mAU*s] | Area %  | Name |
|--------|---------------|------|-------------|--------------|---------|------|
| 1      | 12.151        | BB   | 0.5358      | 2179.75806   | 8.4419  | ?    |
| 2      | 16.150        | BB   | 0.6672      | 2.36409e4    | 91.5581 |      |

Totals : 2.58207e4

**HPLC Spectra of Racemic 3am**



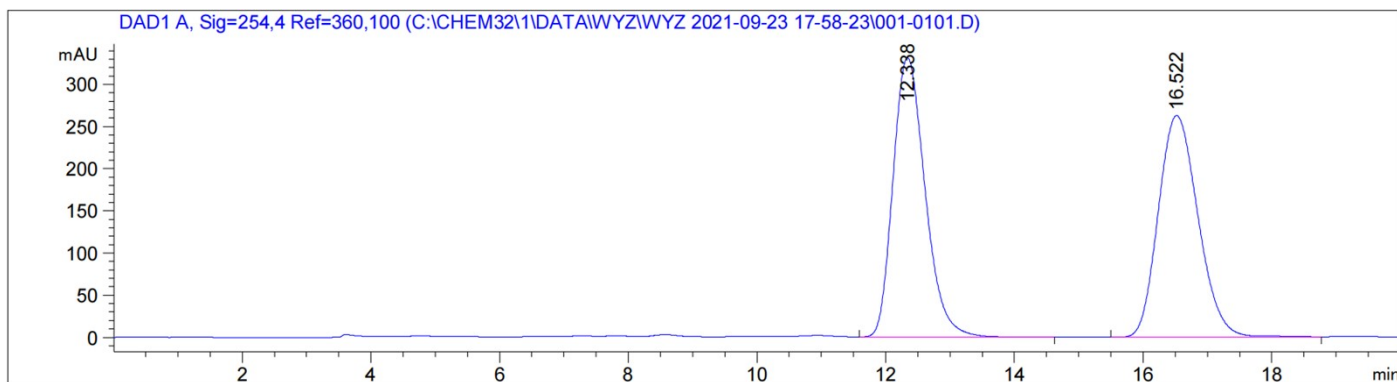

Signal 1: DAD1 A, Sig=254,4 Ref=360,100

| Peak # | RetTime [min] | Type | Width [min] | Area [mAU*s] | Area %  | Name |
|--------|---------------|------|-------------|--------------|---------|------|
| 1      | 12.338        | BB   | 0.5397      | 1.14677e4    | 50.4349 | ?    |
| 2      | 16.522        | BB   | 0.6742      | 1.12699e4    | 49.5651 | ?    |

Totals : 2.27375e4

### (S)-N-(2-phenyl-1-(thiophen-2-yl)ethyl)aniline (3an)

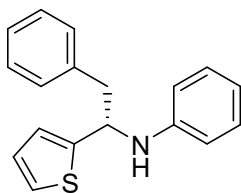

### HPLC Spectra of Chiral 3an

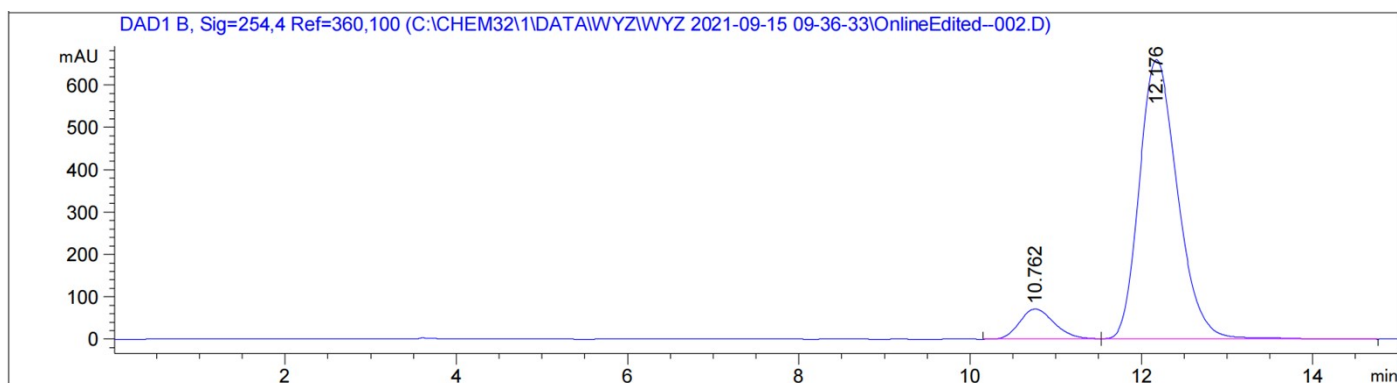

Signal 2: DAD1 B, Sig=254,4 Ref=360,100

| Peak # | RetTime [min] | Type | Width [min] | Area [mAU*s] | Area %  | Name |
|--------|---------------|------|-------------|--------------|---------|------|
| 1      | 10.762        | BV   | 0.4415      | 2020.25610   | 8.9618  | ?    |
| 2      | 12.176        | VB   | 0.4830      | 2.05228e4    | 91.0382 | ?    |

Totals : 2.25430e4

### HPLC Spectra of Racemic 3an

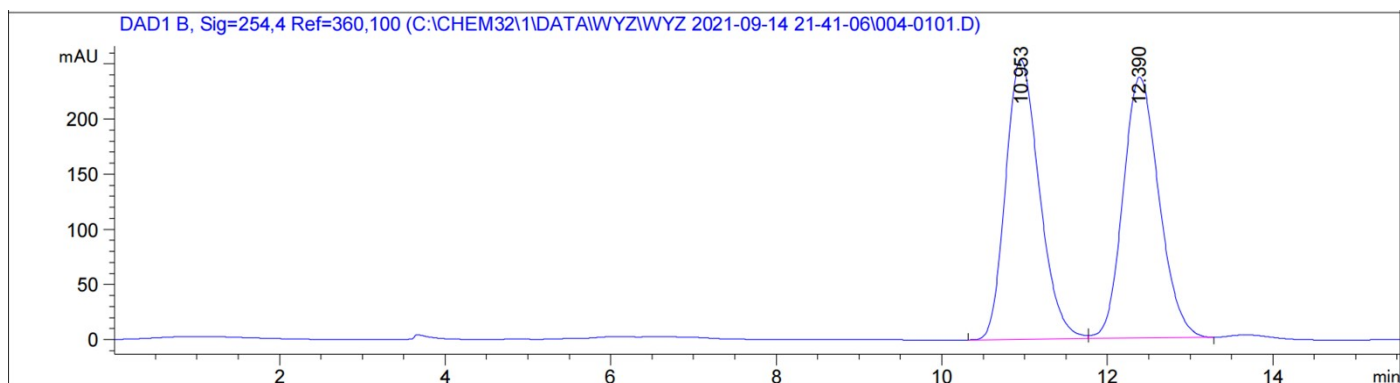

Signal 2: DAD1 B, Sig=254,4 Ref=360,100

| Peak # | RetTime [min] | Type | Width [min] | Area [mAU*s] | Area %  | Name |
|--------|---------------|------|-------------|--------------|---------|------|
| 1      | 10.953        | BV   | 0.4405      | 7180.03174   | 50.1043 | ?    |
| 2      | 12.390        | VB   | 0.4687      | 7150.12500   | 49.8957 | ?    |

Totals : 1.43302e4

**(S)-N-(2-phenyl-1-(thiophen-3-yl)ethyl)aniline (3ao)**

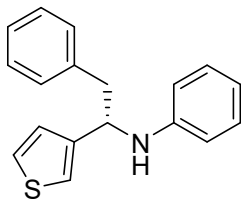

**HPLC Spectra of Chiral 3ao**

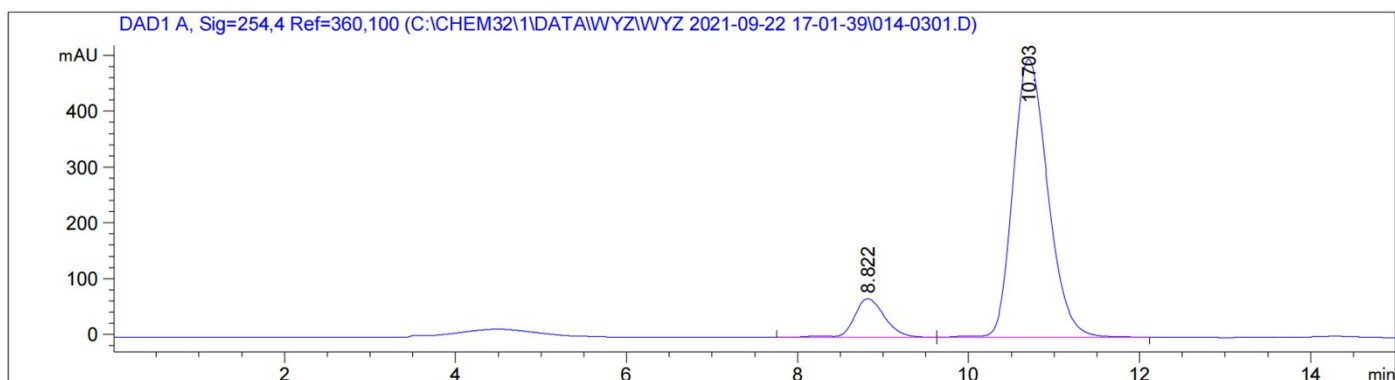

Signal 1: DAD1 A, Sig=254,4 Ref=360,100

| Peak # | RetTime [min] | Type | Width [min] | Area [mAU*s] | Area %  | Name |
|--------|---------------|------|-------------|--------------|---------|------|
| 1      | 8.822         | VB R | 0.3765      | 1721.36646   | 10.9314 | ?    |
| 2      | 10.703        | BB   | 0.4403      | 1.40256e4    | 89.0686 | ?    |

Totals : 1.57470e4

**HPLC Spectra of Racemic 3ao**

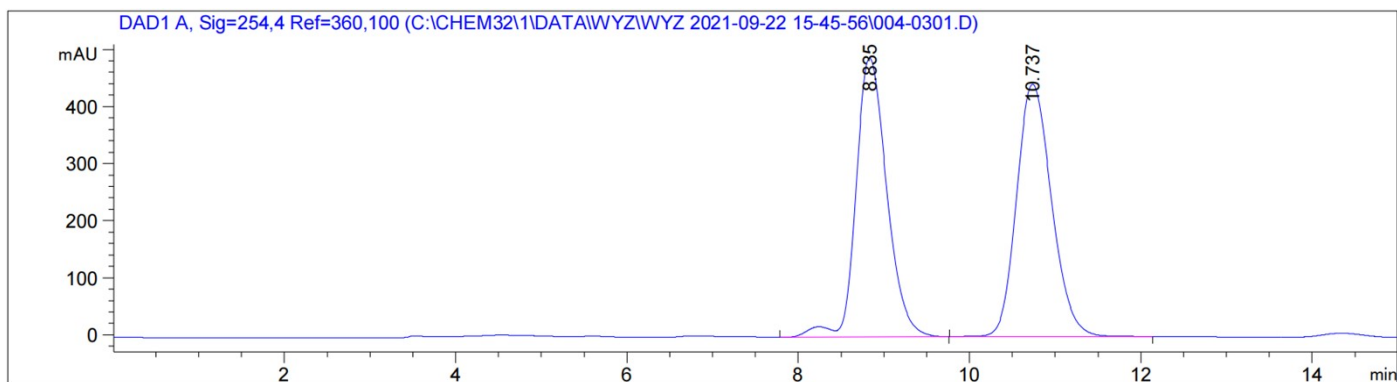

Signal 1: DAD1 A, Sig=254,4 Ref=360,100

| Peak # | RetTime [min] | Type | Width [min] | Area [mAU*s] | Area %  | Name |
|--------|---------------|------|-------------|--------------|---------|------|
| 1      | 8.835         | VB R | 0.3814      | 1.23111e4    | 49.3784 | ?    |
| 2      | 10.737        | BB   | 0.4446      | 1.26210e4    | 50.6216 | ?    |

Totals : 2.49321e4

### (S)-N-(1-(furan-2-yl)-2-phenylethyl)aniline (3ap)

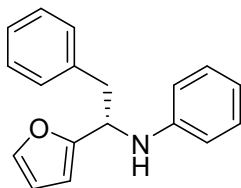

### HPLC Spectra of Chiral 3ap

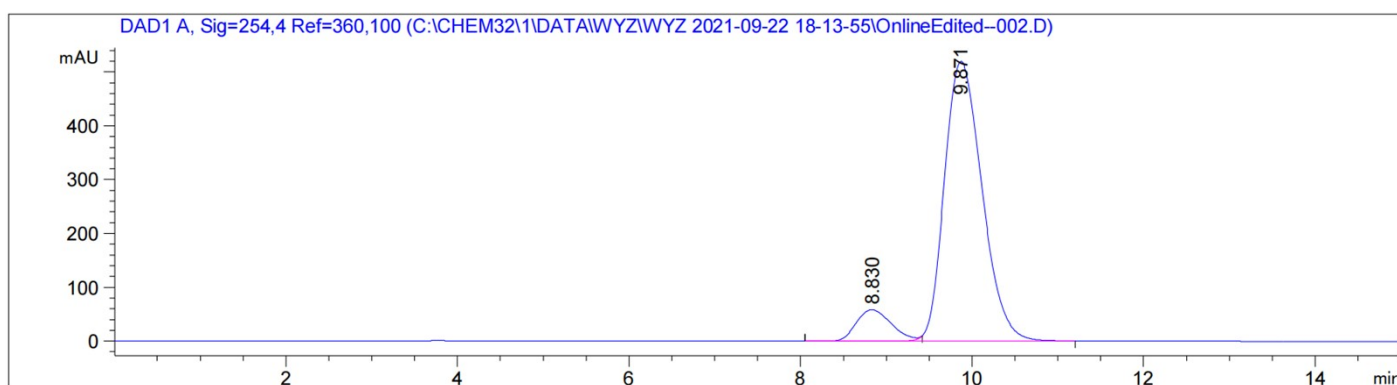

Signal 1: DAD1 A, Sig=254,4 Ref=360,100

| Peak # | RetTime [min] | Type | Width [min] | Area [mAU*s] | Area %  | Name |
|--------|---------------|------|-------------|--------------|---------|------|
| 1      | 8.830         | BV E | 0.4469      | 1649.48486   | 9.4489  | ?    |
| 2      | 9.871         | VB R | 0.4808      | 1.58075e4    | 90.5511 | ?    |

Totals : 1.74570e4

### HPLC Spectra of Racemic 3ap

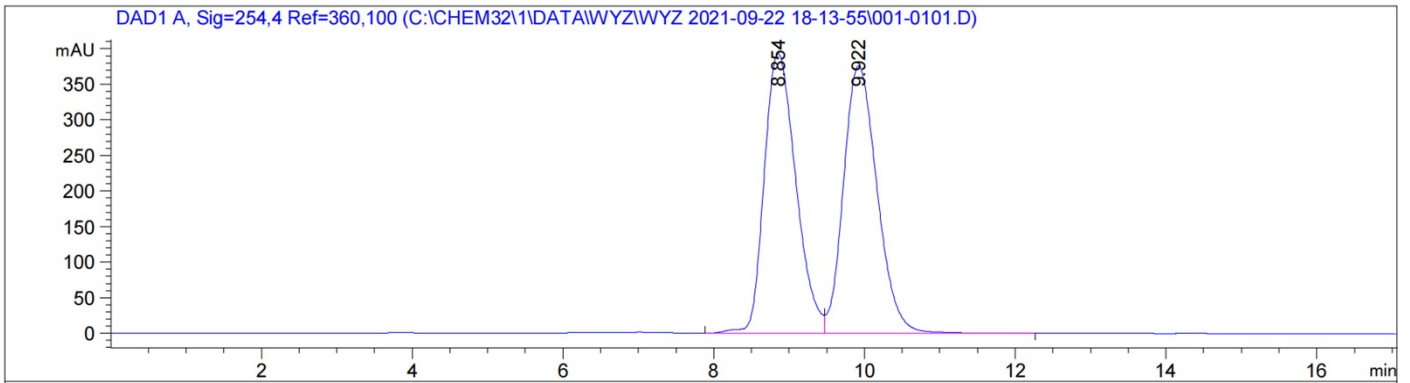

Signal 1: DAD1 A, Sig=254,4 Ref=360,100

| Peak # | RetTime [min] | Type | Width [min] | Area [mAU*s] | Area %  | Name |
|--------|---------------|------|-------------|--------------|---------|------|
| 1      | 8.854         | BV   | 0.4607      | 1.14902e4    | 49.6399 | ?    |
| 2      | 9.922         | VB   | 0.4859      | 1.16569e4    | 50.3601 | ?    |

Totals : 2.31471e4

**(S)-N-(1-(furan-3-yl)-2-phenylethyl)aniline (3aq)**

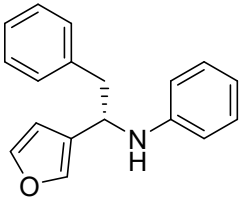

**HPLC Spectra of Chiral 3aq**

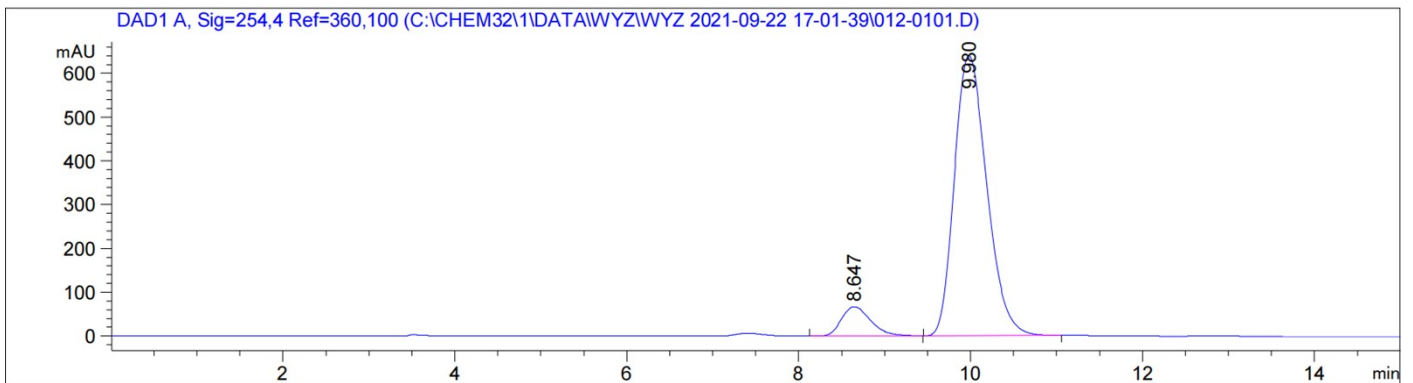

Signal 1: DAD1 A, Sig=254,4 Ref=360,100

| Peak # | RetTime [min] | Type | Width [min] | Area [mAU*s] | Area %  | Name |
|--------|---------------|------|-------------|--------------|---------|------|
| 1      | 8.647         | BB   | 0.3677      | 1577.39795   | 8.5907  | ?    |
| 2      | 9.980         | BB   | 0.4119      | 1.67843e4    | 91.4093 | ?    |

Totals : 1.83616e4

**HPLC Spectra of Racemic 3aq**

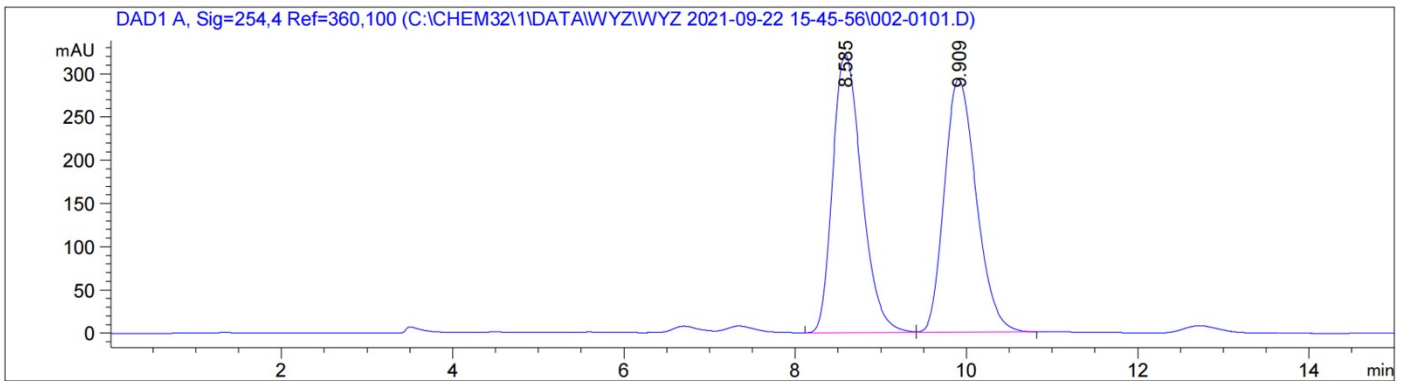

Signal 1: DAD1 A, Sig=254,4 Ref=360,100

| Peak # | RetTime [min] | Type | Width [min] | Area [mAU*s] | Area %  | Name |
|--------|---------------|------|-------------|--------------|---------|------|
| 1      | 8.585         | BV   | 0.3687      | 7580.08838   | 50.0014 | ?    |
| 2      | 9.909         | VB   | 0.4065      | 7579.66260   | 49.9986 | ?    |

Totals : 1.51598e4

**(S)-N-(1-([1,1'-biphenyl]-4-yl)-2-phenylethyl)aniline (3ar)**

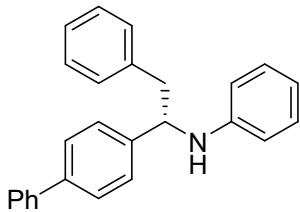

**HPLC Spectra of Chiral 3ar**

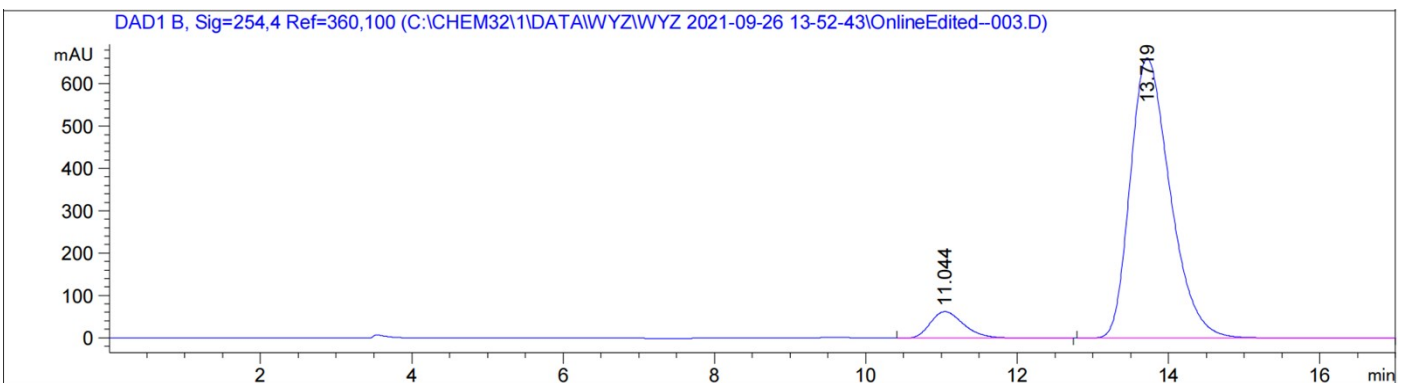

Signal 2: DAD1 B, Sig=254,4 Ref=360,100

| Peak # | RetTime [min] | Type | Width [min] | Area [mAU*s] | Area %  | Name |
|--------|---------------|------|-------------|--------------|---------|------|
| 1      | 11.044        | BB   | 0.4744      | 1943.83862   | 7.3954  |      |
| 2      | 13.719        | BBA  | 0.5647      | 2.43405e4    | 92.6046 | ?    |

Totals : 2.62843e4

HPLC Spectra of Racemic **3ar**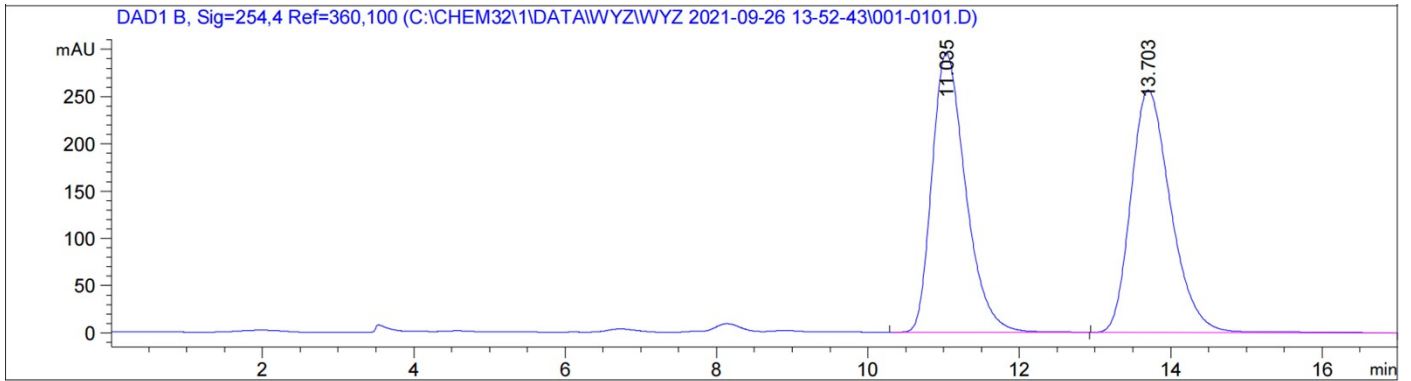

Signal 2: DAD1 B, Sig=254,4 Ref=360,100

| Peak # | RetTime [min] | Type | Width [min] | Area [mAU*s] | Area %  | Name |
|--------|---------------|------|-------------|--------------|---------|------|
| 1      | 11.035        | BB   | 0.4771      | 9154.16895   | 49.3942 |      |
| 2      | 13.703        | BBA  | 0.5622      | 9378.70703   | 50.6058 | ?    |

Totals : 1.85329e4

(S)-11-benzyl-10,11-dihydrodibenzo[*b,f*][1,4]oxazepine (**3as**)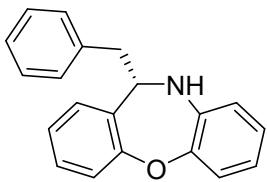HPLC Spectra of Chiral **3as**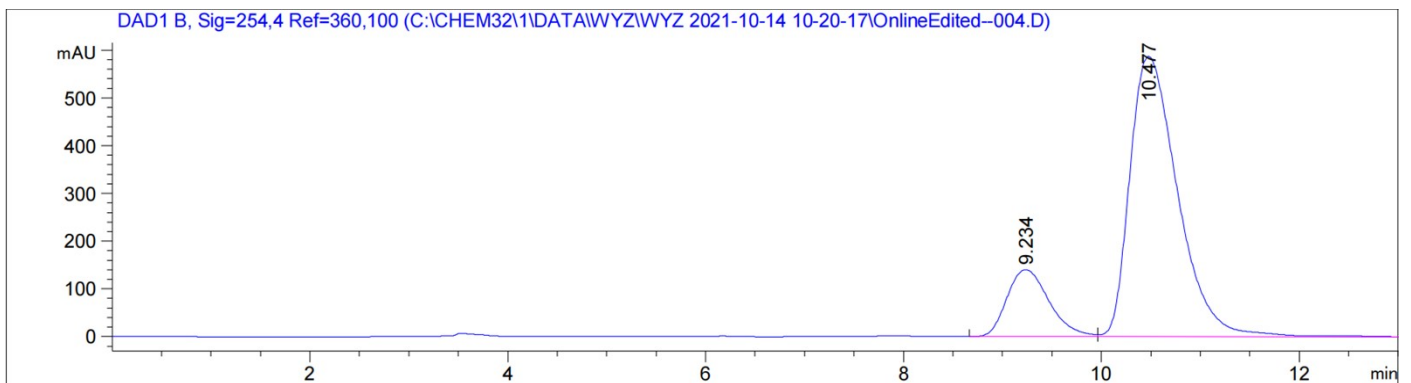

Signal 2: DAD1 B, Sig=254,4 Ref=360,100

| Peak # | RetTime [min] | Type | Width [min] | Area [mAU*s] | Height [mAU] | Area %  |
|--------|---------------|------|-------------|--------------|--------------|---------|
| 1      | 9.234         | BV   | 0.4644      | 4131.66016   | 139.95602    | 17.3211 |
| 2      | 10.477        | VV R | 0.5229      | 1.97217e4    | 587.13428    | 82.6789 |

Totals : 2.38534e4 727.09030

HPLC Spectra of Racemic **3as**

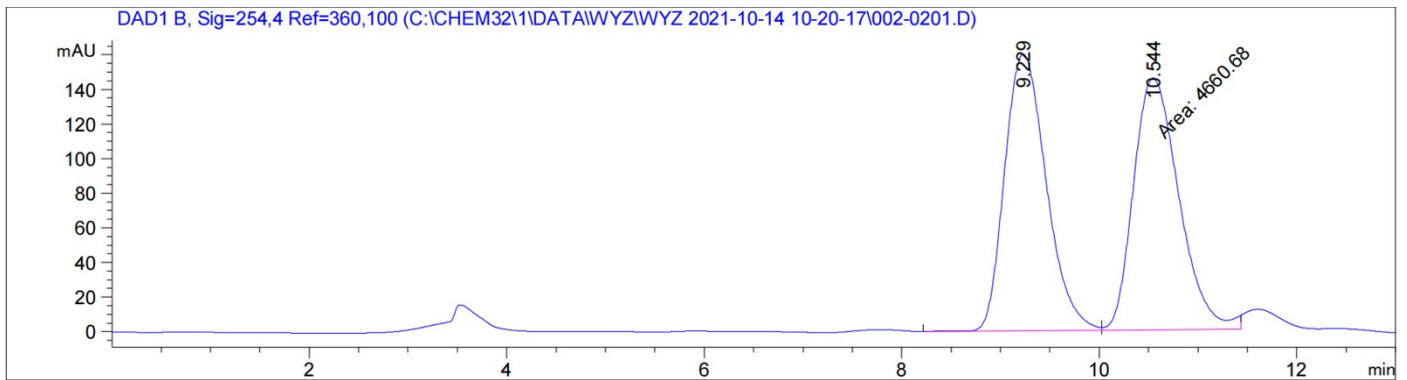

Signal 2: DAD1 B, Sig=254,4 Ref=360,100

| Peak # | RetTime [min] | Type | Width [min] | Area [mAU*s] | Height [mAU] | Area %  |
|--------|---------------|------|-------------|--------------|--------------|---------|
| 1      | 9.229         | BV   | 0.4617      | 4681.77100   | 159.83073    | 50.1129 |
| 2      | 10.544        | MF   | 0.5337      | 4660.67871   | 145.54997    | 49.8871 |

Totals :                                    9342.44971    305.38071

**(S,E)-N-(1,4-diphenylbut-3-en-2-yl)aniline (3at)**

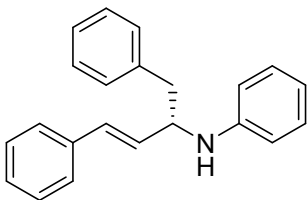

**HPLC Spectra of Chiral 3at**

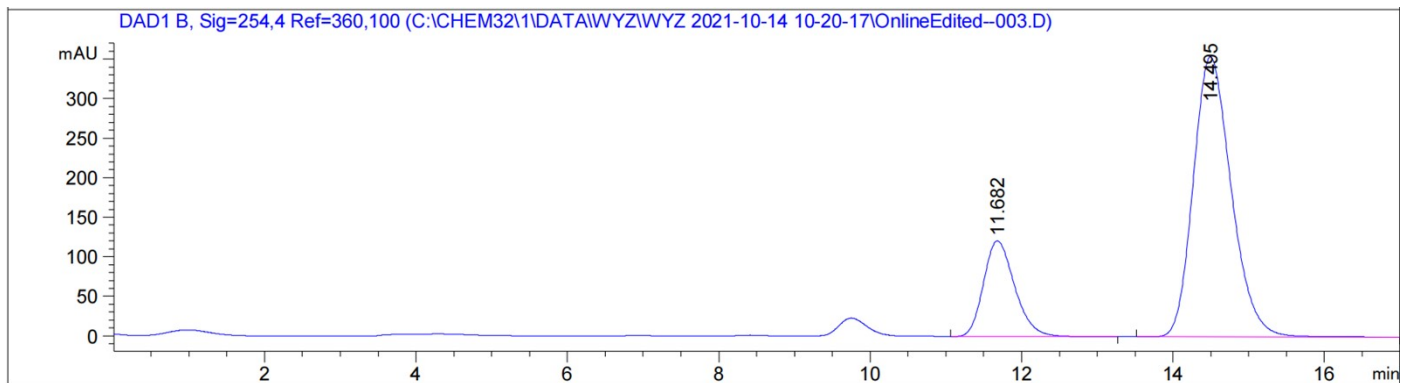

Signal 2: DAD1 B, Sig=254,4 Ref=360,100

| Peak # | RetTime [min] | Type | Width [min] | Area [mAU*s] | Height [mAU] | Area %  |
|--------|---------------|------|-------------|--------------|--------------|---------|
| 1      | 11.682        | BB   | 0.4420      | 3466.85352   | 121.09499    | 21.9196 |
| 2      | 14.495        | BBA  | 0.5387      | 1.23494e4    | 354.27261    | 78.0804 |

Totals :                                    1.58162e4    475.36760

**HPLC Spectra of Racemic 3at**

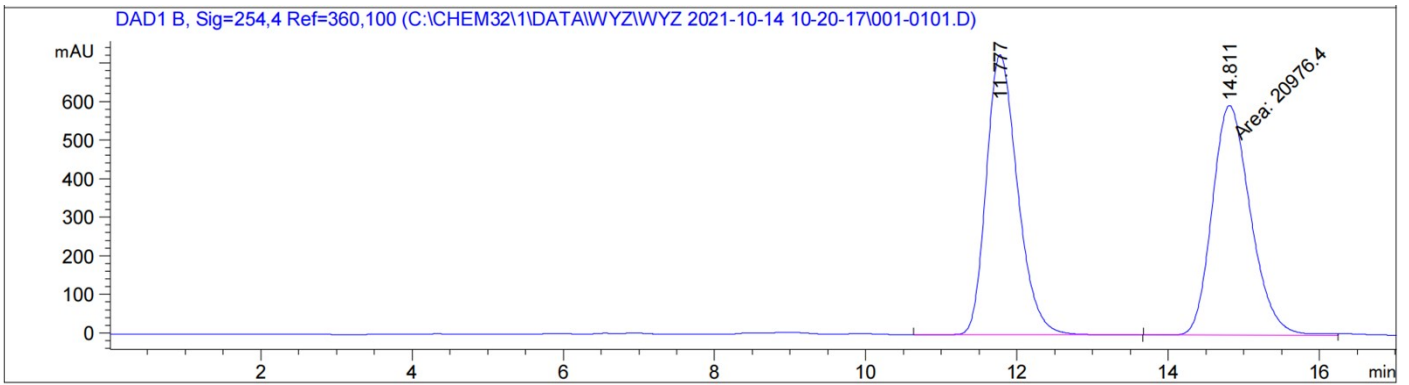

Signal 2: DAD1 B, Sig=254,4 Ref=360,100

| Peak # | RetTime [min] | Type | Width [min] | Area [mAU*s] | Height [mAU] | Area %  |
|--------|---------------|------|-------------|--------------|--------------|---------|
| 1      | 11.777        | BB   | 0.4440      | 2.08993e4    | 725.72937    | 49.9080 |
| 2      | 14.811        | MF   | 0.5878      | 2.09764e4    | 594.75940    | 50.0920 |

Totals : 4.18758e4 1320.48877

**(S)-N-(1,2-diphenylethyl)-4-methoxyaniline (3au)**

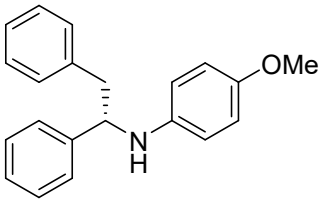

**HPLC Spectra of Chiral 3au**

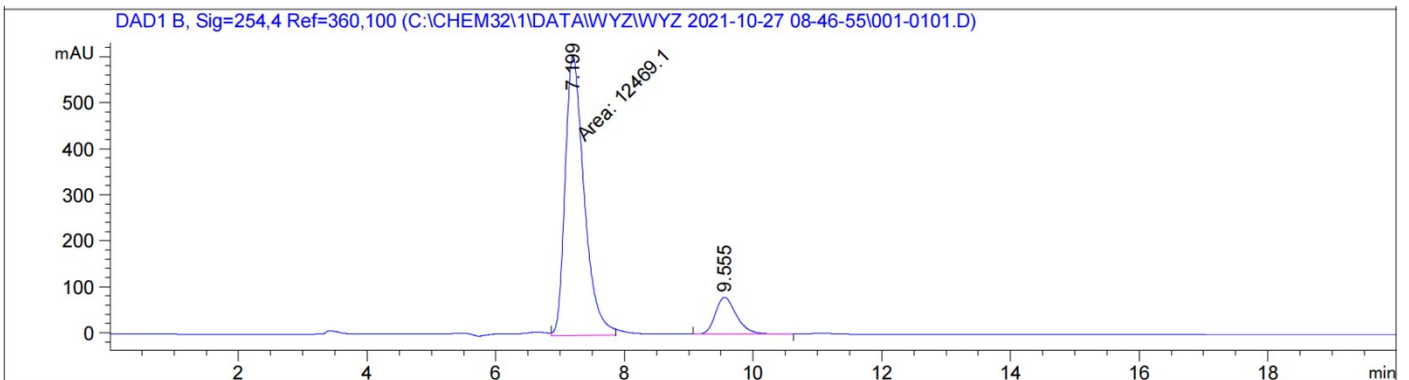

Signal 2: DAD1 B, Sig=254,4 Ref=360,100

| Peak # | RetTime [min] | Type | Width [min] | Area [mAU*s] | Area %  | Name |
|--------|---------------|------|-------------|--------------|---------|------|
| 1      | 7.199         | MF   | 0.3430      | 1.24691e4    | 87.2290 | ?    |
| 2      | 9.555         | BB   | 0.3457      | 1825.56482   | 12.7710 | ?    |

Totals : 1.42947e4

**HPLC Spectra of Racemic 3au**



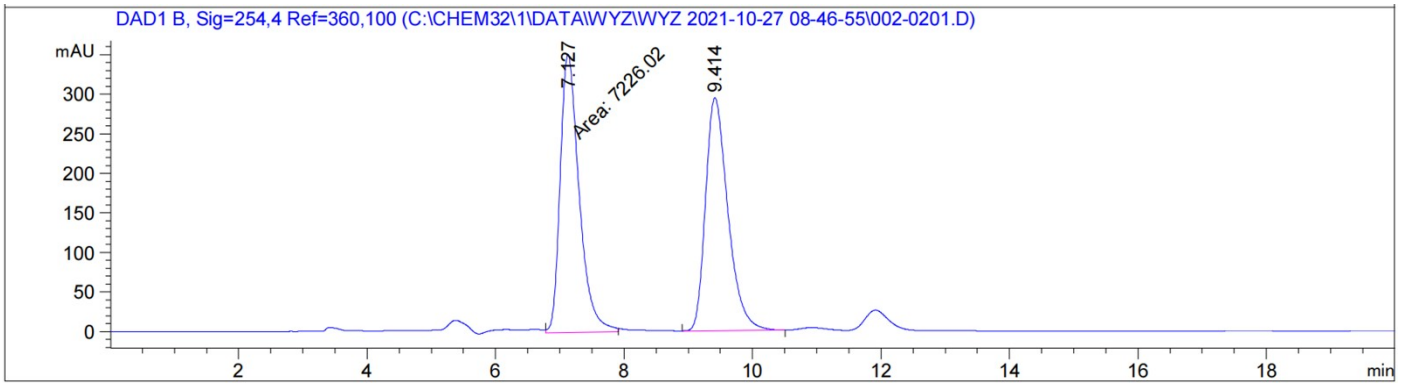

Signal 2: DAD1 B, Sig=254,4 Ref=360,100

| Peak # | RetTime [min] | Type | Width [min] | Area [mAU*s] | Area %  | Name |
|--------|---------------|------|-------------|--------------|---------|------|
| 1      | 7.127         | MF   | 0.3425      | 7226.02490   | 50.3448 | ?    |
| 2      | 9.414         | BB   | 0.3705      | 7127.05078   | 49.6552 | ?    |

Totals : 1.43531e4

**(S)-4-chloro-N-(1,2-diphenylethyl)aniline (3av)**

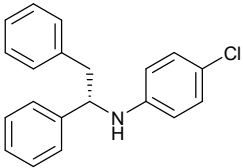

**HPLC Spectra of Chiral 3av**

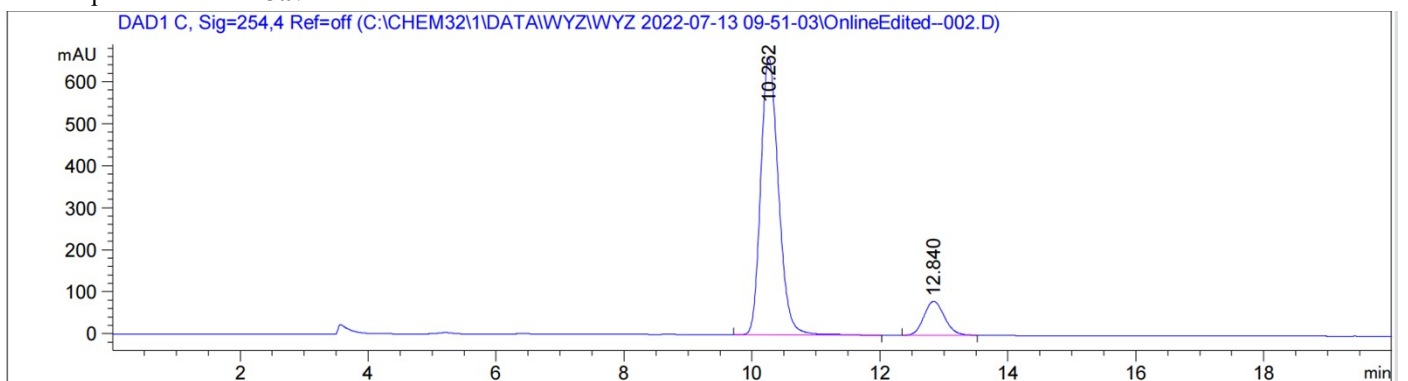

Signal 2: DAD1 C, Sig=254,4 Ref=off

| Peak # | RetTime [min] | Type | Width [min] | Area [mAU*s] | Height [mAU] | Area %  |
|--------|---------------|------|-------------|--------------|--------------|---------|
| 1      | 10.262        | BB   | 0.3006      | 1.26932e4    | 659.35785    | 87.6786 |
| 2      | 12.840        | BB   | 0.3465      | 1783.76685   | 80.51026     | 12.3214 |

Totals : 1.44770e4 739.86811

**HPLC Spectra of Racemic 3av**

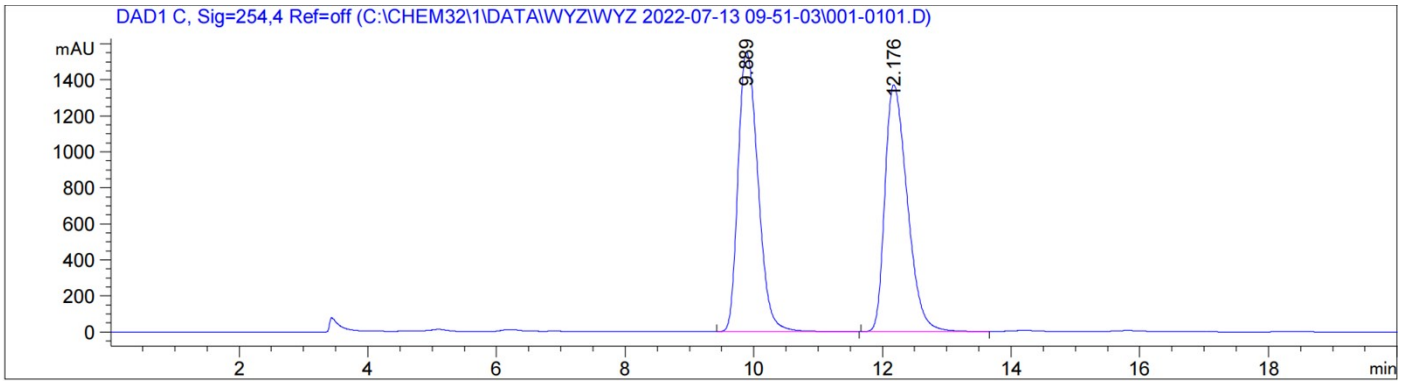

Signal 2: DAD1 C, Sig=254,4 Ref=off

| Peak # | RetTime [min] | Type | Width [min] | Area [mAU*s] | Height [mAU] | Area %  |
|--------|---------------|------|-------------|--------------|--------------|---------|
| 1      | 9.889         | BB   | 0.3405      | 3.33078e4    | 1551.36316   | 50.2134 |
| 2      | 12.176        | BB   | 0.3772      | 3.30246e4    | 1370.14331   | 49.7866 |

Totals :                      6.63324e4   2921.50647

#### (S)-1,2-diphenylethan-1-amine (4)

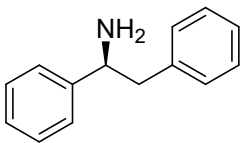

#### HPLC Spectra of Chiral 4

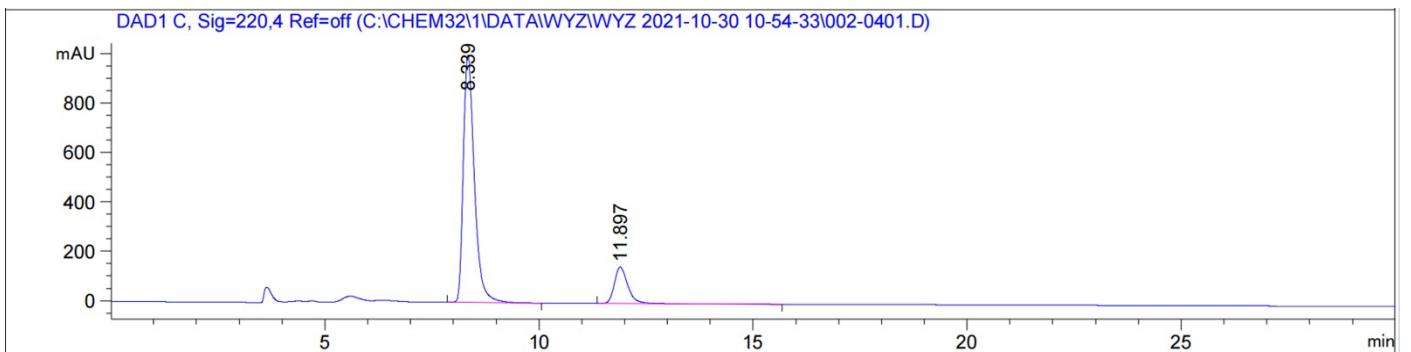

Signal 3: DAD1 C, Sig=220,4 Ref=off

| Peak # | RetTime [min] | Type | Width [min] | Area [mAU*s] | Area %  | Name |
|--------|---------------|------|-------------|--------------|---------|------|
| 1      | 8.339         | BB   | 0.2779      | 1.80125e4    | 84.9133 | ?    |
| 2      | 11.897        | BB   | 0.3300      | 3200.30469   | 15.0867 | ?    |

Totals :                      2.12128e4

#### HPLC Spectra of Racemic 4

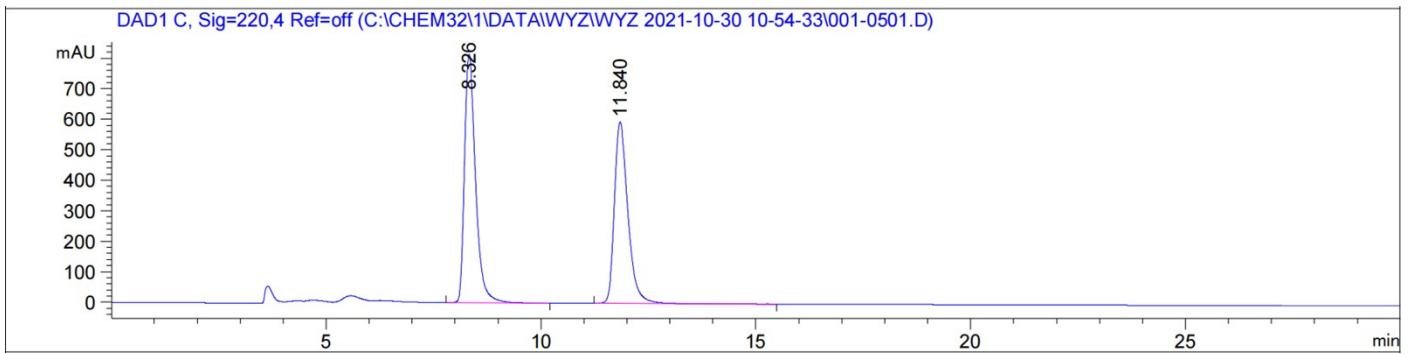

Signal 3: DAD1 C, Sig=220,4 Ref=off

| Peak # | RetTime [min] | Type | Width [min] | Area [mAU*s] | Area %  | Name |
|--------|---------------|------|-------------|--------------|---------|------|
| 1      | 8.326         | BB   | 0.2763      | 1.45434e4    | 52.8268 | ?    |
| 2      | 11.840        | BV R | 0.3326      | 1.29869e4    | 47.1732 | ?    |

Totals : 2.75303e4

(S)-N-(1,2-diphenylethyl-2-d)aniline (*d*-3aa)

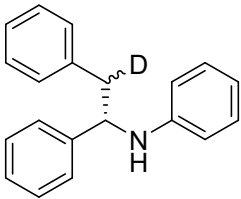

HPLC Spectra of Chiral *d*-3aa

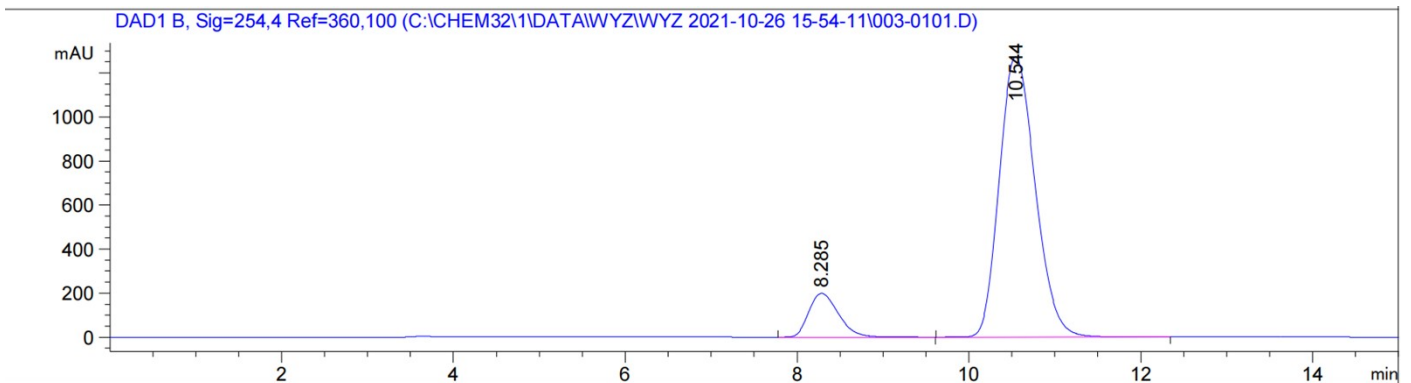

Signal 2: DAD1 B, Sig=254,4 Ref=360,100

| Peak # | RetTime [min] | Type | Width [min] | Area [mAU*s] | Area %  | Name |
|--------|---------------|------|-------------|--------------|---------|------|
| 1      | 8.285         | BB   | 0.3750      | 4756.96826   | 11.4173 | ?    |
| 2      | 10.544        | BB   | 0.4541      | 3.69077e4    | 88.5827 | ?    |

Totals : 4.16646e4

HPLC Spectra of Racemic *d*-3aa

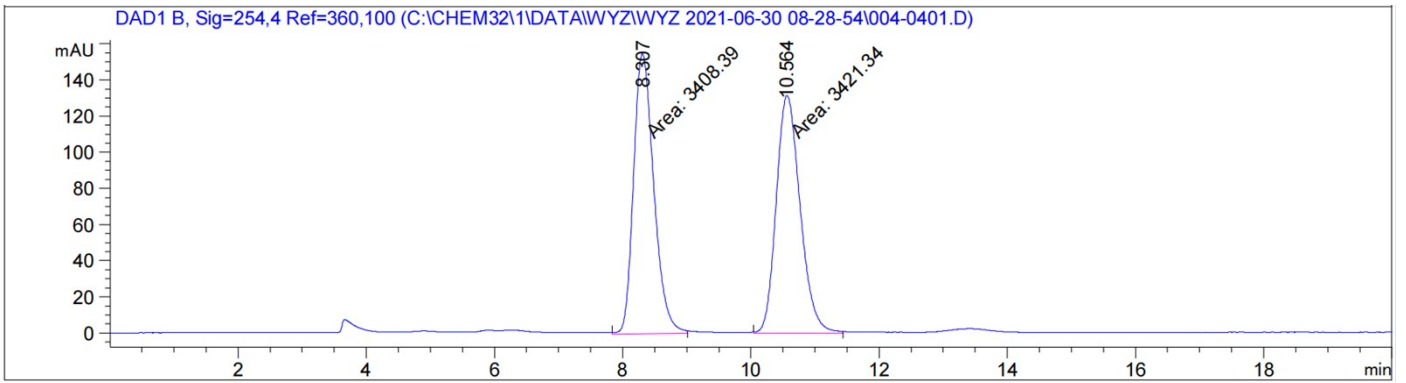

Signal 2: DAD1 B, Sig=254,4 Ref=360,100

| Peak # | RetTime [min] | Type | Width [min] | Area [mAU*s] | Area %  | Name |
|--------|---------------|------|-------------|--------------|---------|------|
| 1      | 8.307         | MM   | 0.3664      | 3408.39185   | 49.9052 | ?    |
| 2      | 10.564        | MM   | 0.4333      | 3421.33521   | 50.0948 | ?    |

Totals : 6829.72705

### VIII. References

1. Y.-Z. Wang, L. Cheng, L. Liu and C.-J. Li, *Tetrahedron* 2021, **80**, 131889.
2. J. G. Ruano, J. Aleman, I. Alonso, A. Parra, V. Marcos and J. Aguirre, *Chem. Eur. J.* 2007, **13**, 6179.
3. S. Kim, Y. K. Choi, J. Hong, J. Park and M.-J. Kim, *Tetrahedron Lett.* 2013, **54**, 1185.
4. (a) Y.-Z. Wang, L. Cheng, L. Liu and C.-J. Li, *Tetrahedron* 2021, **80**, 131889; (b) H. Wang, X.-J. Dai and C.-J. Li, *Nat. Chem.* 2017, **9**, 374.
5. D. Blanco-Ania, P. H.H. Hermkens, L. A.J.M. Sliedregt, H. W. Scheeren and F. P.J.T. Rutjes, *Tetrahedron* 2009, **65**, 5393.
6. A. F. Garrido-Castro, G. Andrea, M. C. Maestro and J. Alemán, *Chem. Commun.* 2020, **56**, 3769.
7. K. Gao, C.-B. Yu, W. Li, Y.-G. Zhou and X.-M. Zhang, *Chem. Commun.* 2011, **47**, 7845.
